# Supplementary material for: Genome-wide identification and characterization of the AP2/ERF gene family in loblolly pine (Pinus taeda L.)
Source: PeerJ. 2024 May 21;12:e17388. doi: 10.7717/peerj.17388 (PMC11122039; doi:10.7717/peerj.17388)
Supplement: Supplemental Information 4 [file peerj-12-17388-s004.xlsx]

## Sheet: Sheet1
Table S1. The protein sequences and coding sequences of the AP2/ERF gene family in loblolly pine.
Gene ID	ACCESSION	Gene location	Protein sequence	Coding sequence
PITA_00259	APFE030304376.1	scaffold227795:71340-75319(-)	MFLALLGRSSPDAEEESGLGCCAHHLEDLFMTLGVSAVEENYHVKGSDDMWRRQVLTLQKLQIYNLSGAPTVFQVLSIAPHPLRLSAQDFGDTGSQPSPAAFGHSHPHRIGDALVKRKPAEHTFSFLQAVALGNNFFTLEGCSLLFTSSLSPPNCVWTLLWVDRKVRSGVTRTPASSHLYPLRQTQEKKTVQSSSRLIKRNTSIALTLRLRGGAAGRSSSAEAFSYKDAVHAKLPKRTAPPAQAPKPFLVDKLEETPSIEIMHPSLDEQTQHFAEHGIICKFNGLWPHTADLYQWIHSNWTNNCKVLLCSKGFLIVVFSFDEDYQKALTGGPWLSGAAGLFLTPRFPDFDPSTAVITKLSIWVRLPNVPANLWHFAVFQGIGNSLGRLLNTDISRGENG…	TTATGAATAGTTCCAAAGAGAAGTTTTTGCAGATATTGATGCATTTTCACCAAAAAGTTTATCAACAGCACTATAATTATCGTGTTCCAACATCCATGAAGGGGGTACCAATAGACCCTCTGCCATGTCTCCCACAATATTTGGCAGATCCAACAGTATATCGTCCTCTATGCTCATCCACTCATTCCCCGAAAGAAAACTCGAAACAAAATTCGACGCGCAAACTACTGCTGCTGCTTCATTATTCCCCGACTCTGCAGGGATCACAGTGTGGGAATCACTAGGGATCGCATTACTCGTCCCCACGGGATCAAGGGATCGATCCTCACTACAATCTTCTTCTGAAGGCATATGAAACTCAACTGCAGCGAGCGCGGTAGCAGCCTGGATGTCTTTGGG…
PITA_00833	APFE031716171.1	scaffold109046:86548-87228(+)	MDKASNEHVSPSPSDENRGQKCPQYKGIRMQKWGSWVCEIRMAKTREKIWLGSYKTAEQAARAYDAGVYCLKGPNAKFNLPNSVPAIPSASSPPHQQIQIVAAKYALDEIPSTSSSLQNITNVKNKVSEEQASPSQPSSVSEMEWACDSGQISNARDMGLWEPPFEENGGLNLEKIPSIEEASLWEFIPTEKEERKTA*	ATGGATAAAGCCTCCAATGAGCACGTTTCACCATCGCCATCAGACGAAAATCGCGGACAAAAGTGCCCCCAGTATAAGGGAATCCGAATGCAAAAATGGGGGAGTTGGGTGTGTGAAATCCGGATGGCTAAAACCAGAGAAAAAATATGGCTGGGGTCATACAAAACCGCCGAGCAGGCCGCCCGTGCTTATGACGCCGGAGTTTATTGTCTGAAAGGGCCCAATGCCAAATTCAACTTGCCCAATTCCGTGCCCGCCATTCCATCCGCATCTTCACCTCCCCATCAGCAAATTCAGATTGTCGCCGCCAAATATGCCTTGGACGAGATACCTTCAACCTCATCTTCTCTGCAGAATATCACAAATGTTAAGAACAAGGTGAGTGAGGAACAGGCATCG…
PITA_00907	APFE030994856.1	scaffold222229:29058-40087(-)	MEITAGQSLSMNMNMVELIRHHLLEVEDEMDIMHLYHQGGNDPSSSSSSVSSPRVSWEYLHGTATATASGSCQNSGGRSPSEDNESSQYSSASTSVSTVTRRTEGININVKPQPREEQSVEKNNGIHYRGVRKRTWGKFPAEIRDPTMLLVSWEYLHGTATATGSGSCQNRSPSEDNESSQYSSASTSVSTVTRRTEAVNINVKPQPREEQNVEKNNEIHYRGVRKRTWGKFAAEIRDPAKQGARVWLGTFVTAEEAALAYDRAAFRIRGAKAVLNFPLAFASISENGSAVGHMGNKRKRGRGETNDEWAACDRESSVS*	TCAACTAACTGAGCTCTCCCGATCACATGCCGCCCACTCGTCGTTTGTTTCTCCTCTCCCTCTCTTCCTTTTGTTCCCCATGTGACCTACGGCCGATCCATTCTCTGAAATGGAAGCGAAAGCAAGGGGGAAGTTAAGGACGGCCTTGGCTCCGCGGATTCTGAAGGCGGCCCGGTCATATGCGAGTGCGGCCTCCTCGGCGGTGACGAAAGTGCCGAGCCAAACCCTGGCCCCCTGCTTGGCGGGGTCCCTGATTTCAGCTGCGAATTTACCCCATGTCCTCTTCCTCACTCCTCTGTAGTGAATTTCATTGTTCTTTTCCACATTCTGCTCCTCCCGTGGCTGTGGCTTCACATTTATATTTACCGCCTCTGTTCTTCTTGTGACTGTGGATACAGA…
PITA_00931	APFE031207039.1	scaffold75613:58390-64589(+)	MELMLDLNAVDTVEVDGSSPEPGSVCSDDAMRSDIISSDNKPMSNQDDSGTSNSSVVNTVVVENGCPDFEASSTCSNMNSHSLKAAKFLGSLGSEIDRAAPPPGNLIFLANENPVGNDCVTRQFFPVEVPEKPPPDTLTRSRWTDVTFCDSPDPAEHQKAMAEGTQPAKKSRRGPRSRSSQYRGVTFYRRTGRWESHIWDCGKQVYLGGFDTANAAARAYDRAAIKFRGAEADINFNYSDYEEDMKQMNNLSKEEFVHILRRQSTGFSRGSSKFRGVTRHKCGRWEARMGQFLGKKYIYLGLFDSEIEAARAYDRAAIRCNGAGAVTNFEPALYQDELIAEGENVKDFKCAGDDHNLDLRLGMPPPTYSTVPSDEQKITQLKSNKLESTNFSEVPDWKK…	ATGGAATTGATGTTAGATCTGAATGCAGTTGATACTGTAGAGGTCGACGGTTCGAGTCCCGAGCCGGGTTCTGTTTGCAGCGATGATGCGATGAGATCTGATATTATTAGCAGCGACAACAAGCCCATGTCCAACCAGGATGACTCCGGGACGTCGAATTCTTCTGTGGTTAATACAGTGGTTGTAGAAAATGGTTGCCCGGATTTCGAAGCCTCCTCGACGTGTTCCAACATGAATTCTCACAGTCTGAAAGCTGCCAAATTTCTGGGATCACTAGGCTCCGAGATCGACCGAGCAGCTCCCCCGCCTGGCAATCTGATATTCCTTGCCAACGAGAACCCGGTTGGAAACGACTGTGTTACCCGGCAGTTTTTCCCGGTCGAAGTCCCGGAAAAGCCT…
PITA_01000	APFE030732680.1	C4018507:5688-6836(+)	MTTQSARVRVTRPARRMEVNQRRGKPGRDGVEILEECRLRNGEMEEFDTFGNLRLYIYEGNGRCNKILGVRSAMPGKWKSEIRCGGRQRISLGTFGRAEQAARAYDAACLALRGNSAVRNFPRLRKLLPQSRSQDPKDIKEAAKQATSETVSASLSLAETLAASGDIEEQEQQSTTSASFSLAETAAGAYDSACLALKGDDAVLNFQYLINLFPPSCSRNTNDIKETARQVVHLFCRKKNDAYSF*	ATGACAACCCAAAGCGCAAGGGTTCGAGTTACACGCCCTGCTCGCAGGATGGAGGTGAATCAGAGGAGAGGAAAACCTGGGCGCGACGGAGTTGAAATACTGGAGGAGTGCAGGTTGCGAAATGGCGAAATGGAAGAGTTCGATACCTTCGGAAACCTCCGCCTATACATTTACGAAGGAAATGGACGGTGTAACAAAATATTGGGTGTGCGTTCTGCAATGCCTGGAAAATGGAAGTCTGAAATTCGATGTGGTGGCCGTCAACGGATCAGCCTGGGTACTTTTGGTCGAGCAGAACAGGCAGCCAGAGCGTACGACGCTGCTTGCCTGGCTCTGAGAGGGAACTCTGCAGTGCGAAATTTTCCGCGTTTAAGAAAGTTATTGCCACAATCGCGTTCT…
PITA_01007	APFE031048473.1	scaffold180872:28662-30245(-)	MCGGAIIADFIPANRSQRVTPRDLWPDFDTFADLFINGGAVSESVNKSDSFDEGYKQKNKPTNNIFNSKHEFSSGGENEAISPLKDFEIPPLKDFEKCPAKSAGRKKSNLYRGIRQRPWGKWAAEIRDPRKGIRVWLGTFNTAEEAAKAYDAEAKKIRGKKAKLNFADGSCSVKVDSRNKMSRKKVKSCAKNPDLLLALNIKSKVKSSYSPKPDLLEDCYLQMERSLKDVRRSDLSIYGYDDMEYGDSQFINSPAPSQSNSNASAVQSSEHSHASQNSQKSCSCELCSLNYSEVSNFMFPAYGDTPKFEPVESSYPVGYFDSDHSSNSFDGEHFSWAHEMKTPEISSVYNDDGHESLFVDIKPPVHGVLKDRPVDTSINVNTGTKSFGVDTSMEVNDGT…	TTAAAAGCAAAAGCCAGCACTGCTTTGATAAACTGAACCTGAAGTTCCCGGATCACCAGGACTGCTCTGATGAGGTAAAACTGAAATTGGCACATCGTCAAAGAACCATGGTTTCAAGGACCACTCCTCATCTGGAAAAGAGCCTGCTGCGTCACCCTCTGACAACCCAAGATATTTTTCCAAAGCAGACAATTTTTCAGAAAGCTCAAGCTGCAGGATGTTATCCTCTGTTTTGTAGCATCCTGTTCCACCATTGACCTCAACAGGGATATCCACAGCAAAACATTCTGTCCCGTCATTGACCTCCATAGAGGTATCTACGCCAAAACTTTTTGTCCCAGTGTTGACGTTTATAGAGGTATCCACAGGTCTGTCCTTAAGAACACCATGGACTGGAGG…
PITA_01074	APFE031157231.1	scaffold137028:14684-37477(-)	MVKPSPKQNANGKPENRSLMSRQFKGIRLRKWGKWVSEIRMPNCRAKIWLGSYDTPEKAARAYDFAAYCLRGSKARFNFPDSPPEIPCASSLSPSQIQAAAARFAAEEFRMPSDDDTASSSCGSVAESDLPPEIPCASSLSPPPIQATAPRFAAEEFRLPSDEDTASSSCDSVAESNIDSQQISAEQGSAFWDSLFLEDLDNGESLNLEDFPPIDLAMDDLGFLLQPSEDWGIF*	TTAGAAAATCCCCCAGTCTTCGGACGGCTGAAGAAGAAAACCCAAATCGTCCATTGCCAAATCTATGGGAGGAAAATCCTCTAAATTTAGAGATTCGCCATTATCCAGATCTTCCAGGAATAGTGAATCCCAAAATGCCGAACCCTGCTCCGCCGAAATCTGTTGGCTGTCAATGTTGGATTCCGCTACCGAGTCGCAGGACGATGATGCCGTGTCCTCATCTGACGGCAACCGGAATTCTTCTGCGGCGAACCTGGGCGCAGTGGCTTGGATTGGCGGCGGCGATAGAGAAGAGGCGCATGGAATTTCCGGCGGCAAGTCGGATTCCGCTACAGAACCGCAGGACGATGACGCCGTGTCGTCATCTGACGGCATCCGGAATTCTTCTGCGGCGAACCG…
PITA_01156	APFE030670840.1	C5144821:19777-20771(+)	MSESSVADNQLLDQENQEALCSCLQSTTECRRGHKVDSREEAFCSCLRSRTECERGHEVDSRREAFCSRPRSTTECRRGHMVDSRYSTLTQELCSQLSTSSRNRKMSKRRKGGKRTKKYVYIGIRQRPWGKWAAEIRDPKVRARVWLGTFDTAEDAARAYDAAAWRIRGKKAKLNFSDVHHSVDTDPNAESGSPVSNLVSDDYTAKTPEAADGKKKMEEAAQTAVHHAATSSCTNMWSSGEWIDYSPVEVLGEYVGMDFSLQYDDWAWSSSQEVGIDDLEESYPYGMFHLWMFDQ*	ATGTCAGAGTCGTCGGTGGCTGACAACCAGCTTCTTGATCAAGAAAATCAAGAAGCCCTCTGCTCCTGTCTTCAGTCGACAACTGAATGTCGACGTGGTCACAAGGTCGATTCCCGCGAAGAAGCCTTCTGCTCCTGTCTTCGGTCGAGAACTGAATGTGAACGAGGTCACGAGGTCGATTCTCGCCGAGAAGCCTTTTGCTCCCGTCCTCGGTCGACAACTGAATGTCGACGAGGTCACATGGTCGATTCCCGCTATTCGACTCTCACGCAAGAATTGTGCTCCCAGCTTTCGACTAGTTCAAGGAACCGCAAAATGTCCAAGAGAAGGAAAGGCGGGAAAAGAACGAAGAAGTACGTGTACATTGGAATCCGGCAGAGGCCATGGGGTAAGTGGGCG…
PITA_01270	APFE030025572.1	scaffold123699:33237-80382(+)	MSMDMDMLELIRHHLLEVEDDIDIDIDIEGTSPLLFTPTGVESGGYINIDDHDHDTQANSTVTRASCQNIVSKTTLKENANEFTQQIHSSSSPRCSVMKGAEAFQVKQQPRERENGKKRETSARNYRGVRRRPWGKFTAEIRDPAAKGARVWLGTFNTVEEAAHAYDRAAYRFRGARALLNFPLSFACNSEKGSAVGNMAHKCKRGNSGSGAG*	ATGAGTATGGACATGGATATGTTGGAGTTGATTCGTCACCATTTGCTGGAAGTGGAGGACGATATTGATATTGATATTGATATTGAGGGAACTTCGCCGTTGTTGTTCACCCCCACTGGCGTTGAGAGTGGTGGTTATATTAATATTGATGATCATGATCATGATACCCAAGCCAATTCCACAGTGACCAGGGCCTCATGCCAAAATATCGTCAGCAAAACAACATTAAAAGAGAACGCGAATGAATTTACACAACAGATCCATTCTTCATCTTCTCCAAGATGCTCAGTTATGAAAGGAGCAGAGGCGTTTCAGGTAAAGCAACAACCACGGGAGCGGGAGAATGGAAAGAAGAGAGAGACAAGTGCCAGGAATTACAGAGGAGTGAGGCGGCGGCCG…
PITA_01484	APFE031739230.1	C5081841:69986-71528(+)	MPQSDLDSAACDNDGGSYIEPTNTEEQSNTMAAVDSGGRSLIPQASHREGRTSVVGDPNANSMGERLPKYRGVKRSNRKWTAQASNRKNDPEKSKKSVHLGTFPTAEMAAVAYDAAVLVLRGESRANRLNFPEYSPHIKSIVEGFSPSDIANNMKYVAWKAAKNIAHLLSLENKDSQQAKDEGFEVSAAMPAAAISSSSASLMSSNIGMPHSIHTADFPVVPPAGVKQRIKEPEHECSTPVGIAKNNVNNEKIHPGQSSSNTSGCAADSGISSAYDPLHESSVHEPKFPISNPNSMPKRVQSFDELIDIAKDPYMP*	ATGCCGCAAAGCGATTTGGACTCTGCTGCTTGTGATAATGATGGAGGTTCATATATTGAACCCACTAACACTGAAGAACAAAGCAACACTATGGCTGCTGTTGATAGTGGTGGCAGATCTCTGATTCCACAGGCCTCTCATAGAGAAGGTCGTACCAGTGTTGTTGGAGATCCTAATGCGAACAGTATGGGTGAACGATTACCGAAATACAGAGGTGTGAAGCGTAGTAATAGAAAATGGACGGCACAAGCTAGTAATCGAAAAAACGATCCTGAGAAATCGAAAAAGTCGGTCCATCTTGGAACTTTTCCCACAGCAGAGATGGCTGCAGTTGCGTACGACGCAGCAGTCTTGGTCCTAAGGGGCGAGTCACGTGCCAATCGTCTCAACTTTCCAGAG…
PITA_01592	APFE030186837.1	scaffold971:42136-51215(-)	MDDTGVSLSMNMLELIRQHLLEVEDDIDIDHNGINLYNQLASATVPRASCEDNSGRSISEIEGNEITEQNYSSSSSVRAVRRTPQPEEREIGDMKQSCRRRFRGVTQRPWGKFAAQIRDPTRKRCRVWLGTFNTAEEAAIAYDRAAFKIRGARALVNFPLALASNSDNGSVVGHLGHEKNRETKDAAGNSSGRLIRQHLLEVEDNIDIDNNVIKIYNQLANATVPRASCKENNNRSTSNIEGNEITEQNYCSYSICTVRRKLDREERAIGDMKRSCHRNFNVMQHPWGKFSAQIRDPTRKLSHVWLGTFNTAEEVAITYDRVTFKIRGAKALNYYYHGLSSICPYLPSL*	TTACAATGATGGAAGGTATGGACAGATGCTACTCAGACCATGGTAATAATAATTCAGGGCCTTGGCTCCTCTGATCTTGAATGTAACACGGTCATATGTGATCGCAACCTCTTCGGCAGTGTTGAAAGTACCCAGCCAAACATGAGAGAGCTTCCTCGTAGGGTCTCTGATTTGTGCAGAAAACTTTCCCCATGGGTGTTGCATGACATTGAAGTTTCTGTGGCAGCTTCGCTTCATGTCTCCAATCGCCCTCTCCTCTCGGTCTAGCTTTCTTCTAACTGTGCATATAGAATAAGAACAGTAGTTTTGCTCAGTAATTTCATTCCCTTCAATATTGGATGTTGATCTATTGTTGTTCTCTTTGCATGACGCCCTAGGGACAGTGGCATTGGCCAGCTG…
PITA_01616	APFE030252246.1	scaffold213393:178333-185625(-)	MRSLCEQLVTIHKEFSCLSDMKLKCKDNAKALNVVHTVIIYTMNEWASKKNTSPSSPASVEVQETIMKEAIECDYSTEHNEVGSAVTEEFVPSVIGFSENGRHLELEEGQFKDWVLARLKGKNVREFERLGSGVNMVPESARETDGFEDLRRYSLLSLQQASKLQSSQYKGVVPQPNGRWGAQIYEKHERVWLGTFNKEEDASMVYDRAALKFRGRDAVTNFSPARGGSQEARFMREHTKEQIVDMLRNHSYDEEFEHHSKRMMMTAARPTCTNNEEQKSEAPGQRRTGTRWPDDGNGNSAIAALLRQHLFDKAVTPSDVGKLNRLVIPKLHAEKYFPLVRDSSEKGSFLNFEDDMGKIWRFRYSYWKASQSYVLTKGWNRFVKDKKLVVGDFVSFHRG…	TTAAGATTCCGTCAAACTCACTCCAAAAAGTCTTACTCCTTTCTTGTTCGCAGTATCCAGACTCGATGTTGCTTTGTGTTCCGGGGTCTCCATTTCTTGTGCCGCGGAGGGCTGAGAAGGGTTCACAAAAGGATGCAATGGTTTGATATTTGTACTTCCTTCGCCGGAATTGAACGAGTTGTGGAAGCTGCCTTGATCTGCTTGTTTGGTGGGCGGCTCCGAGAAACAGAAAGAAAACTCTCCGTTGAGAGGAGTTGCCGGGATATGAGACCACAGATGATCAAAATTACCCACTTTTTTCACCAAGGGAGACATATAATTAGAGTTGAACTGCGTAAACGCATCGGAATTACTAGAACTGGGCCAGACGATGGGCAACCATTGAGCGTTACGGACGAC…
PITA_02042	APFE030997439.1	scaffold166047:24035-46656(-)	MAPIDRDHRKRVVDVDVNGAKEVNYRGVRKRQWSKYKAEIRDPSIKRRRWLGTFPMTKEAEIEYDNAAKNLKGVRENSNFPPPLLPLDTIHINRGNPAPTTRLATPPPPPPPLSLYVNHDNTENRFIVIENL*	TTACAAATTTTCTATTACAATAAACCTATTCTCGGTGTTGTCATGATTAACATACAGAGAGAGAGGCGGAGGTGGAGGTGGAGGGGTAGCGAGTCTCGTAGTGGGGGCGGGGTTGCCTCTGTTGATGTGGATGGTGTCGAGAGGAAGCAATGGAGGTGGGAAGTTGGAATTTTCTCTCACTCCTTTCAAATTTTTTGCGGCATTGTCATATTCTATTTCCGCTTCCTTGGTCATGGGGAAGGTACCTAGCCACCTCCGTCTTTTAATGGAAGGATCTCTAATTTCAGCCTTGTATTTACTCCACTGTCTCTTTCTCACACCTCTATAATTCACTTCCTTTGCACCATTCACATCCACATCCACCACTCTTTTTCTATGATCTCTATCAATGGGAGCCAT
PITA_02225	APFE031577898.1	scaffold46507:15178-15873(+)	MVRSARNEDQMSMSKRQFKGVRMRRWGSWVSEIRAPTQKTRIWLGSYSTPEAAARAYDAALLCLKGRTPVNIKDLADRHANNIAECSNRNTARNTDNAPLLMEASKDQTETKEESSAATSIDGHKYSQATSSSSAWIDPDFGSFNHIHHDCDAVLELSSVDPPPPASFNNWMEDYNDHDQDFMCSLWSFT*	ATGGTTAGATCTGCACGCAATGAAGATCAGATGTCGATGTCGAAGAGACAGTTCAAGGGCGTGCGAATGAGACGCTGGGGGTCATGGGTTTCAGAGATTAGGGCTCCCACCCAGAAAACCCGTATTTGGTTGGGATCCTACTCCACCCCGGAGGCTGCTGCCCGTGCTTACGACGCTGCACTCTTGTGTCTGAAGGGCAGAACGCCAGTGAACATCAAGGATCTTGCAGACCGGCATGCCAATAATATTGCAGAATGCAGTAATAGAAACACAGCTAGAAACACTGATAATGCTCCTCTGTTGATGGAAGCTTCCAAGGACCAGACAGAAACTAAAGAAGAGTCTTCTGCCGCCACATCCATTGATGGGCACAAGTATTCTCAAGCTACTTCCTCTTCG…
PITA_02539	APFE030922782.1	C5087723:23191-24028(-)	MENFPDQEPDNAISLPREDRGSRQFKGIRQRKWGSWVSEIRMPRSRKKIWLGSYTTPEQAARAYDAAVRGRNADFNFSVPDIPTASPLSREQIQHAAAEYAWGQAPSSFPSFAGQIFWKFFYNSLSQGPRQSSSVSVMDLARDNLQICEEREDLALWLSMLAGSDGAGIPNFEIFPSTGYLRLLRVHLVNRNTSLHSHGHEHGKRYLM*	TCACATTAAATATCGCTTGCCATGTTCATGCCCATGCGAATGCAGCGATGTATTTCGGTTGACCAAATGTACTCTTAATAGTCTTAAATACCCAGTTGACGGGAATATTTCGAAATTTGGAATCCCGGCGCCGTCAGATCCCGCCAGCATCGACAACCACAGCGCCAAGTCCTCCCTCTCCTCACATATCTGAAGGTTGTCTCGCGCCAAGTCCATTACCGAAACCGAAGACGACTGCCGGGGACCCTGCGAAagggagttgtaaaaaaacttccaaaaaatctGCCCTGCGAAAGAGGGAAAACTGGAAGGGGCTTGGCCCCAGGCATATTCGGCGGCGGCATGCTGAATTTGCTCACGGGAAAGGGGAGACGCAGTCGGAATGTCGGGCACAGAAAA…
PITA_02556	APFE030813233.1	scaffold226173:185202-194378(-)	MQRPSPQEVEDAHVLEDEDRKQKCGQFKGVRLRKWGSWVSEIRMPKSREKLWLGSYPTVEQAALAYDAAVYCLRGPTSKFNFPNSVPDIPSASSLSRRQIQAAAAKYARDKLPSSPPTLQEKEIAREDAASPSRSASVSEAEGRSDCQQILEEDALNLWESGSDSRDSWHTLNLERIPSIDDALAMELNSCVWQEQQQQEEEHEIQMPKSREKLWLGSYPTAQHPARAYNAAAYCLRGPNAKFNFPDSVPDIPSASSLCRSQIQLAAAKYARDKLPSSPPTLQEKENAREEAALPSRSASASEAEGLRDSCHTLNLERECLPLTMHWPWSSITVFGRTSSRKREHANIIVDSTELWNF*	TCAAAAGTTCCACAACTCTGTCGAGTCGACAATGATGTTAGCGTGCTCCCTCTTCCTGCTGCTGGTCCTGCCAAACACAGTAATTGAGCTCCAAGGCCAATGCATCGTCAATGGAAGGCATTCTCTTTCCAAATTCAGAGTGTGGCAACTATCCCTGAGCCCCTCCGCTTCTGAAGCAGAAGCCGATCTTGATGGCAATGCGGCCTCCTCCCTCGCATTCTCTTTTTCCTGCAGAGTGGGCGGACTCGAAGGGAGTTTATCCCGCGCATATTTGGCGGCGGCGAGTTGAATCTGGCTGCGGCAAAGGGAAGAAGCAGAGGGAATGTCGGGCACAGAATCGGGGAAATTGAATTTGGCGTTCGGACCTCTCAGACAATACGCGGCCGCGTTGTAGGCGCG…
PITA_02581	APFE031721858.1	C5001901:49425-50573(+)	MTTQSARVRVTRPARRMEVNQRRGKPGRDGVEILEECRLRNGEMEEFDTFGNLRLYIYEGNGRCNKILGVRSAMPGKWKSEIRCGGRQRISLGTFGRAEQAARAYDAACLALRGNSAVRNFPRLRKLLPQSRSQDPKDIKEAAKQATSETVSASLSLAETLAASGDIEEQEQQSTTSASFSLAETAAGAYDSACLALKGDDAVLNFQYLINLFPPSCSRNTNDIKETARQVVHLFCRKKNDAYSF*	ATGACAACCCAAAGCGCAAGGGTTCGAGTTACACGCCCTGCTCGCAGGATGGAGGTGAATCAGAGGAGAGGAAAACCTGGGCGCGACGGAGTTGAAATACTGGAGGAGTGCAGGTTGCGAAATGGCGAAATGGAAGAGTTCGATACCTTCGGAAACCTCCGCCTATACATTTACGAAGGAAATGGACGGTGTAACAAAATATTGGGTGTGCGTTCTGCAATGCCTGGAAAATGGAAGTCTGAAATTCGATGTGGTGGCCGTCAACGGATCAGCCTGGGTACTTTTGGTCGAGCAGAACAGGCAGCCAGAGCGTACGACGCTGCTTGCCTGGCTCTGAGAGGGAACTCTGCAGTGCGAAATTTTCCGCGTTTAAGAAAGTTATTGCCACAATCGCGTTCT…
PITA_02761	APFE031244797.1	scaffold223361:29386-32558(-)	RGSAKPVYGRPISEAYYKSFSWGWEKLDTMCGGTVTWNSNPVSKSERAILEDLWTSLHGVRRHFHESFDLYSSDDDDDFLDFPDLFKENLSAKSLWIAKKECPLAGGGLATYPSHYKGTPNTTRDSQCKGAAKTTSGRKKKKTMYRGIRQRTWGKWAAEIRDPKKGMRVWLGTFDTAEEAARAYDAEARKIRGKKAKLNFADDLLPPKKSKKVVKKLKDMITEDSHKKTCMHLPECSASSGIVQSQKSNVKATAGLLNEAQQFCQFDSPLQSRSGESSILTDVHISSVQTPPVSFYDEVQDINTNNLQMLMPPSQKVVSKVKSLENHTNSWNLNSDYNYIYFDDLCSPQGVDDAGTPKTLSALSTTIMGDGADFMNVAAQLKMGISEGIHHDDSCLLDC…	CTACATGGGCATATCATCAAAATTCCATATTGCTGGAATATTTACTTTCTCAGGAAAGTACGTTCCATTGACATCAACACGTCCAGTTGATTGATCAGTCTCACACTCAAAATCTGAATATTGAAGCAACCCAAGAAAAGAATCCAGAACCGGTTCCTCAACTGAATTGGATTCTAAGGTCTCCTGGCTTGTTTGGGGTTTCGTAACCTTGCAATCAAGCAAGCAGCTATCATCATGATGAATGCCTTCAGAAATACCCATTTTTAATTGTGCTGCCACATTCATGAAATCAGCCCCATCGCCCATAATAGTAGTGCTGAGTGCAGATAATGTTTTGGGGGTTCCAGCATCATCAACCCCTTGAGGCGAACATAAGTCATCAAAATAAATATAATTATA…
PITA_02889	APFE031666172.1	C4766303:18337-19485(+)	MTTQSARVRVTRPARRMEVNQRRGKPGRDGVEILEECRLRNGEMEEFDTFGNLRLYIYEGNGRCNKILGVRSAMPGKWKSEIRCGGRQRISLGTFGRAEQAARAYDAACLALRGNSAMRNFPRLRKLLPQSRSQDPKDIKEAAKQATSETVSASLSLAETLAASGDIEEQEQQSTTSASFSLAETAAGAYDSACLALKGDDAVLNFQYLINLFPPSCSRNTNDIKETARQVVHLFCRKKNDAYSF*	ATGACAACCCAAAGCGCAAGGGTTCGAGTTACACGCCCTGCTCGCAGGATGGAGGTGAATCAGAGGAGAGGAAAACCTGGACGCGACGGAGTTGAAATACTGGAGGAGTGCAGGTTGCGAAATGGCGAAATGGAAGAGTTCGATACCTTCGGAAACCTCCGCCTATACATTTACGAAGGAAATGGACGGTGTAACAAAATATTGGGTGTGCGTTCTGCAATGCCTGGAAAATGGAAGTCTGAAATTCGATGTGGTGGCCGTCAACGGATCAGCCTGGGTACTTTTGGTCGAGCAGAACAGGCAGCCAGAGCGTACGACGCTGCTTGCCTGGCTCTGAGAGGGAACTCTGCAATGCGAAATTTTCCGCGTTTAAGAAAGTTATTGCCACAATCGCGTTCT…
PITA_03224	APFE030904954.1	scaffold25652:168925-169989(+)	MALSSVKQEVQYADMSVLDRIRSHLIGDFEPLFFSTGNRVSDSTRNCSPEEENFIQTALTADSVDDSRREIKTETLTAAVKSCRPSLSISVTRRGSLECDQIPVDWGLENSLIPSVSPCLSAAWTKLPLDENDSEDMVLYSILKEAANNGWVPRTPKEETVTEIKKESAFPVKLEVDIRQERRAIPPPKNVKKNTGRHYRGVRQRPWGKFAAEIRDSARQGARIWLGTFITAEEAALAYDRAAYKMRGSRALLNFPLQVGAEDGNTCNHTSSLKKEESSGENTLKRKRQREEMMSGSEVQWERQCRVRLEDRKKMGSGMVEEILNGKMDTPPLTPRATDMSFTGFLSTGQLMVN*	ATGGCACTGAGCAGCGTAAAACAAGAAGTCCAGTACGCAGATATGAGTGTCTTGGATCGTATTCGGAGCCATTTAATCGGCGATTTTGAACCCTTGTTCTTCAGTACGGGAAATCGGGTGTCTGATTCCACAAGAAATTGCAGCCCCGAAGAAGAAAACTTCATCCAGACAGCACTCACGGCTGACTCAGTCGATGACAGCAGACGGGAAATAAAGACGGAAACTCTGACCGCGGCCGTTAAGTCTTGCCGTCCCTCGCTCTCTATCTCCGTTACTCGACGTGGATCATTGGAGTGTGACCAAATTCCGGTTGATTGGGGACTCGAGAATTCTTTGATTCCGTCTGTGAGCCCTTGCTTATCTGCTGCCTGGACGAAGCTTCCGTTGGATGAAAACGAT…
PITA_03623	APFE031717088.1	super973:355990-362227(-)	MDATKRIIVGRVKGKQFSINYIKEWVNKEWALGLESQTEVINLSRECFMVCFTNSEVVDWVLDLGFGKFLIFFKDGIPYLTCREKDWEEIFTCDSVETTLCILFDIALQTRVEFDSGFPRQQTNMAKPSQDQNRRNRRENHSWKSRKFKGIRMRKWGKWVSEIRMPHSTRRIWLGSYDTPKMAARTYDFVMHCLKGSKAKFNFPHSLKEIPCASSLSQPQIQALAAKYAAE*	TTATTCTGCAGCGTACTTGGCAGCGAGGGCTTGAATTTGCGGCTGTGATAGAGATGAAGCGCAAGGGATTTCCTTCAGGGAGTGGGGAAAATTGAACTTGGCTTTCGACCCCTTGAGACAATGCATGACAAAATCGTAGGTGCGTGCAGCCATTTTTGGCGTGTCATAAGAGCCTAACCAAATTCTGCGAGTTGAATGGGGCATTCGAATTTCGGACACCCATTTCCCCCATTTTCTCATTCGGATTCCCTTGAACTTTCGTGACTTCCATGAGTGGTTTTCACGTCTATTGCGGCGGTTTTGGTCTTGCGAGGGTTTAGCCATGTTGGTTTGTTGCCGAGGAAATCCGGAGTCGAACTCAACACGTGTTTGCAAAGCTATGTCGAATAGGATGCATAA…
PITA_03695	APFE031706912.1	C5125651:59551-60138(+)	MCGPEANLISLNGSLRVTPRDFNTSSESFKPSNNIFHFNHEFSSGGENEAIPLKDFEQPVFLFGRNINSKVKPLYSPKHDSPLLSAENDENSSAKSSGRKRKTLYRGITQRRWGKWAAQIRDPRKGITVWLGTFNTAEEAAKAYDAEAKKIRGKKAKLNFPDD*	ATGTGTGGACCTGAAGCGAATCTCATTTCCCTCAACGGGTCTCTGCGTGTAACTCCCAGGGATTTCAATACGTCGTCGGAATCTTTCAAGCCCAGCAACAATATTTTCCACTTCAACCATGAATTTTCTTCAGGTGGTGAAAATGAGGCTATTCCTCTCAAGGATTTCGAACAGCCTGTTTTTTTATTTGGTCGGAATATAAACAGCAAAGTGAAACCTTTATATTCACCAAAGCATGACTCTCCTCTGCTAAGTGCTGAAAATGACGAAAATTCCTCGGCCAAAAGCAGCGGGAGGAAGAGGAAAACTTTGTACAGAGGTATCACGCAGCGTCGATGGGGAAAATGGGCTGCACAGATTCGAGATCCAAGAAAGGGCATTACGGTTTGGCTTGGAACG…
PITA_03709	APFE030215205.1	scaffold220130:6845-8056(-)	MAYRFKFPLVAGGLATYPSHYKETTNTTRDSQCKGAAKTTSGRKKKKTMYRGIRQCTWGKWAAEIRDPKKGMRVWLGTFDTAEEAARAYDAEARKIRGKKVKLNFADDLLPPKKSKKVIKKLKDIITEESHKKTCMHLPESSASSGTEKPCMA*	TCAAGCCATGCAAGGTTTCTCTGTACCTGAGCTTGCCGAACTTTCTGGCAAGTGCATGCATGTCTTTTTATGTGACTCTTCTGTAATGATATCCTTAAGCTTCTTTATCACCTTCTTACTCTTCTTGGGAGGTAACAAGTCATCAGCAAAATTGAGTTTTACTTTCTTTCCTCTAATCTTCCTGGCTTCTGCATCATAAGCTCTAGCAGCTTCTTCTGCTGTATCAAAGGTACCCAGCCAAACCCTCATTCCTTTTTTGGGATCTCTGATTTCTGCAGCCCATTTGCCCCATGTGCATTGTCTTATACCTCTATACATAGTCTTCTTCTTCTTCCTACCACTTGTGGTCTTGGCTGCTCCTTTGCATTGCGAATCTCTTGTGGTGTTAGTTGTTTCTTT…
PITA_04364	APFE030229228.1	scaffold44548:24978-25742(+)	MAKPPSNRNGQSRPEIRSVKSRQFKGIRMRKWGKWVSEIRMPNSRGRIWLGSYDTPEKAARAYDCAVYCLRGCKARFNFPESPPEIPCASSLSPPQIQAAAFKFAAQEFRLHLEDDLASSSSRSEAESGIQRQRISVEQGPEIWDSVLENLDNFESIPFEDLSESPPEILCASSLSPPQIQAAASKFAAEELQLPLEDVAASSSSPSQAESGIEGQRISVEQDTAIWDSVLEDMDIHESTFRGFYSLTYLHGGF*	ATGGCTAAACCTCCTTCAAATCGGAACGGCCAAAGTAGACCCGAAATACGCTCAGTGAAGTCGAGGCAGTTCAAAGGTATTCGAATGAGAAAATGGGGGAAATGGGTATCAGAAATTCGAATGCCCAATTCCAGGGGCAGAATTTGGCTGGGCTCCTACGACACCCCGGAAAAGGCTGCCCGCGCCTATGACTGTGCCGTCTATTGTCTGAGAGGATGCAAGGCCAGGTTCAATTTTCCCGAGTCCCCGCCGGAAATTCCCTGCGCCTCTTCTCTATCTCCGCCGCAGATTCAAGCTGCCGCGTTCAAGTTTGCCGCACAAGAATTCCGGCTGCATCTGGAAGATGATCTGGCGTCCTCTTCCTCCCGTTCGGAAGCGGAATCCGGCATTCAAAGGCAA…
PITA_04644	APFE030878153.1	super1139:634406-635978(+)	MKKEVDPAIVVKRSREAETEELGSKRFRGVRRRSWGKWVAEIRMLRCRSRVWLGSYHTAEQAARAYDAASFCLRGPAAFLNFPESPPAQFLPYPLRPLHDIHLSPQQIRTIAANYATMTPSSTSISTSTSGLQPQQSKPMDTSTLEEAGGEGSASVTTHVDSAKIGPRKMPSCRFAIEKESLGTEHIAALMICLTHCNYPGKASRWDNCLLQVSSRAHRDITSDDIHHIGHGSMDILNQRRGIWM*	ATGAAGAAAGAAGTAGATCCGGCCATTGTGGTGAAGAGATCCAGAGAAGCGGAGACAGAGGAGCTGGGGAGCAAGAGATTCAGGGGTGTGAGGAGGAGATCGTGGGGGAAATGGGTAGCGGAGATCAGGATGCTCCGATGCCGATCCCGCGTATGGTTGGGATCCTACCACACTGCAGAACAGGCAGCTCGTGCCTATGATGCTGCCTCTTTCTGCCTACGAGGTCCTGCTGCTTTCCTCAACTTCCCTGAATCTCCACCTGCTCAGTTTCTCCCATATCCCCTGCGCCCTCTTCATGATATTCATCTCTCCCCGCAACAGATTCGGACCATTGCAGCTAATTATGCCACTATGACTCCATCTTCCACTTCAATTTCGACTTCTACATCAGGGCTTCAA…
PITA_04780	APFE031551321.1	scaffold15836:19735-20391(+)	MSNNLNMLELIRHNLLEVEDEVDDQEDTAATTTTGSSWQNYSSRSTSEVNEDEFILVQDCFSSSSPSVYTVIRGAEEFEVVKPESHGEENGEMKQIRRARPYRGVRQRPWGKFAAEIRDTAKKGARVWLGTFSTAEEAALAYDRAAFKIRGARALVNFPLTFTSDAENGSAIGQITHKRKSGNKGVKK*	ATGAGCAACAACCTGAATATGTTGGAGTTGATTCGCCATAATTTGCTGGAAGTGGAGGATGAAGTTGATGACCAAGAGGACACTGCTGCAACTACCACCACCGGAAGCTCATGGCAAAATTACAGCAGCAGATCAACATCAGAAGTCAATGAGGATGAATTTATACTAGTGCAAGACTGTTTTTCTTCTTCTTCTCCTTCTGTATACACAGTTATAAGAGGAGCAGAGGAGTTTGAGGTGGTAAAGCCAGAGTCACATGGGGAGGAGAATGGAGAAATGAAGCAGATCAGAAGGGCCAGGCCCTACAGGGGAGTCAGGCAGAGGCCGTGGGGGAAATTCGCTGCAGAAATCCGAGATACAGCCAAGAAGGGCGCTCGAGTTTGGCTGGGCACTTTCAGC…
PITA_04978	APFE031730011.1	scaffold227178:52049-52656(-)	MEMPPSREQNHGHAQPNEDSGQTTRKFKGIRLREWGKIRIPRSREKIYLGSYKTAEQAARAFDAAMYCLRGPNAKFNFPDSVPSIPSAFSLSPSQIQVAASKYALNEIPGTSPSPHNNTKEEPSLPSQPSSVSDMELSNDAQHKSEDLEFWESLFAEPDGPHYLNLEKIPSIDEELALELIPTSEEEVDIRLWNFEES*	TCAGCTCTCTTCAAAGTTCCACAGCCTTATGTCAACCTCCTCCTCCGAAGTCGGAATGAGCTCCAACGCCAATTCTTCGTCAATGGATGGGATTTTTTCCAAATTCAAATAATGAGGACCATCTGGTTCTGCAAACAGAGATTCCCAAAACTCCAAGTCCTCCGATTTATGCTGGGCGTCATTAGACAATTCCATGTCAGATACCGAAGATGGCTGCGAGGGAAGTGAGGGCTCCTCTTTAGTATTATTGTGCGGAGAAGGCGAAGTCCCAGGGATTTCGTTCAAGGCATACTTGGAAGCGGCAACCTGGATTTGCGAAGGGGAAAGAGAAAACGCGGACGGAATGGAGGGCACAGAATCGGGAAAGTTGAACTTAGCGTTGGGCCCTCTCAGGCAATA…
PITA_05049	APFE030976756.1	scaffold203593:125260-127516(+)	MARPQRYRGVRQRHWGSWVSEIRHPLLKTRIWLGTFETAEDAARAYDEAARMMCGPRARTNFPFNPNAPPSPSSKVLSSTLTAKLHRCYLASIQGPRSGSSKKDAMTRADKNNNIHSSNQSLTCLRLDNERSNNIGIWQKKAGSKQSESNWVMKLELDHDQHGNSTLKRETDDDIAQMIEELLDCGSLEICSPMASADSSISNAESMLN*	ATGGCTAGGCCTCAAAGATACAGAGGAGTCCGTCAGAGGCACTGGGGATCATGGGTCTCTGAAATCCGCCATCCCTTATTGAAGACCAGAATATGGCTAGGAACATTTGAAACAGCAGAGGATGCAGCACGAGCATATGATGAAGCTGCAAGGATGATGTGTGGGCCGAGAGCTAGAACCAACTTCCCATTCAATCCCAATGCACCTCCATCTCCATCTTCAAAGGTTTTGTCCTCCACGCTCACTGCCAAACTACACCGCTGTTATCTGGCCTCGATACAAGGACCGAGATCGGGCTCATCGAAGAAGGATGCCATGACAAGAGCTGATAAAAATAACAATATACATAGCAGCAATCAGTCCCTCACTTGCTTAAGATTGGATAACGAAAGATCCAAC…
PITA_05232	APFE031229486.1	scaffold105298:75178-97731(-)	MAKPSQNQNHHNKRQNRSLKSRQFKGIRMRKWGKWVSEIRMPHSTCRIWLGSYDTPEKAARAYDFAAYCLRGSKAKLNFPLSRPEIPCASSLSPPQIQASAAKFATEELQQSSEAAFSSSVSKAEHCNDHQEIWAEKSPAFWDWVLLECLESGKSPNLNEFPPLDESMEYFGKTQEHDMAKPSQNQNHHNKRHNRSLKSRQFKGIRMRKWGKWVSEIRMPHSTCRIWLGSYDTPEKAARAYDFAAYCLRGSKAKLNFPLSRPEIPCASSLSPPQIQASAA	GGCGGCAGAGGCTTGAATTTGAGGCGGCGATAGAGAAGAGGCGCAGGGGATTTCCGGCCGGGAAAGGGGAAAATTGAGCTTGGCTTTCGATCCTCTCAGGCAATACGCCGCAAAATCGTAGGCGCGGGCAGCCTTTTCCGGGGTGTCGTATGAGCCCAGCCAAATTCTGCAAGTAGAATGGGGCATTCGAATTTCCGAAACCCATTTCCCCCATTTTCTCATTCGGATTCCCTTAAACTGCCGCGACTTCAGTGAGCGGTTATGGCGTTTGTTGTGGTGGTTCTGGTTTTGCGAGGGTTTAGCCATGTCGTGTTCCTGAGTTTTCCCAAAGTACTCCATCGACTCATCCAACGGCGGGAATTCATTTAAATTTGGAGACTTGCCGCTCTCCAGACATTC…
PITA_05248	APFE031474727.1	scaffold157219:40270-41936(-)	MERKKQSSESSTSKETTEPDRPPGNAGRIPGLRIATATEGEMSTIVQALIRVMHEGGDEAATEETCSESKMSMPDQPLTNISDRPKRSREEYGSSCNPGAETPQNSSSGSDLPRETEISSAKRTSFGQLTRARSHSFDSVAEAEQAEDYGEIKSSAAMSDFPTGEQMKEATKKRRYRGVRQRPWGKWAAEIRDPKKAARVWLGTFDTAEDAAKAYDNAALKFRGPRAKLNFPDEALARSQQADPINLSVMAERTTQTTPTSHESLSMLLPSAFMRPTAQFQHPSPTFTSINRVDPFSFPRVRTSQASLHLPLFSSPQYSMLPRRLEVPPWQPYVFSHQNQAIGLHPQAGSSIGVTYPIPLTSSPRVWISGQPEQANLTMARGMEPRRLLLNPFESTGTI…	TTATGAAATGTCTGGAGTTGTCGTCGTTGTTGATGATATATCCATTTGACCAATTGTATTTGGCCTCCCCTGCGGTCTCCGCTCCGTCGATGACTCCAATCCTTCTAGTAATGTAGGCCTTTGGATTCCTTCCGTTGAAACGAAATGTTGTTGCGAATACATTGTTTCCAATCCTTCTGGTAATCTCGGCCTCTGCATTCGTTCTGTAGGAATGAAATATTGTTGCCGATAGATCGTTTCCGATCCTTCTGGTAATCTCGGCCTTTGCATTCCTTCTGTTGGACTGAGATATCGTTCCTGATAGATTGCTCTCGTTAATTCATACGGGGCACTTTCATGCCGCCTGTCAAATATTGTGCCCGTAGATTCGAATGGGTTTAATAGAAGTCTCCTCGGCTC…
PITA_05436	APFE031190446.1	scaffold119133:132018-132677(+)	MEKFSPQEDDHAHSPEEEVRGQKCRQFKGIRLRKWGSWVAEIRMPKSREKLWLGSYKKPEQAARAYDAAVYCLRGPNAKFNLPNSLPGIPSASSLSRRQIQLAAAKYALDQFHSSAPPLQNFNNKAMDEAASPSRPDPVSETELSSDSHQISEEGQLDLWESPIEVSGGNYEGRMNLNLQRMPSIEEVSALELIYSICQQHEEEEHINLFLDPTELWNF*	ATGGAGAAATTCTCTCCACAGGAGGATGACCATGCCCATTCTCCAGAAGAAGAAGTTCGCGGGCAAAAGTGCCGCCAATTTAAGGGAATCCGATTGCGAAAGTGGGGGAGCTGGGTAGCAGAAATTCGAATGCCCAAATCTCGAGAGAAGTTATGGCTGGGGTCATACAAAAAGCCCGAGCAGGCCGCCCGCGCCTACGACGCGGCAGTTTATTGTCTGAGAGGGCCGAACGCCAAATTCAATTTACCCAATTCTTTACCCGGCATTCCGTCTGCGTCTTCTCTTTCCCGCCGGCAGATTCAACTCGCTGCTGCCAAATATGCGTTGGATCAATTCCATTCGAGTGCGCCCCCTCTGCAGAATTTTAATAATAAGGCCATGGACGAGGCCGCATCGCCG…
PITA_05723	APFE030523034.1	scaffold39811:27237-28276(+)	MCGPEADLISLNGSLPVTPRDFDTLFINGGAVLESFNKSGSFDDECKQKIEPSKNIFNFNHEFSSGAENEAIPPLKDFKKSSAKSTRRERATLYRGIRRRPGGKWAAEIRDPRKGTMVWLGTFNTAEEAAKAYDAEAKKIRGEKAKVNFPDQSAENEAIPPLKDFEKSPAKSTGAENGGIPPLKDFEKSSAKSTGAENGGIPPLKNFEKSSAKSTGAENEAIPPLKDFKISPLKDFENSSAKSTGRKRTTLYRGIRQRPWGKWAAEIRDPRKGAMVWLGTFNTAEEAAQAYDAEAKKIRGKKAKLNFPDHSC*	ATGTGTGGACCTGAAGCGGATCTCATTTCCCTCAACGGATCTCTGCCTGTAACTCCCAGGGATTTCGATACGTTGTTCATCAATGGTGGAGCTGTGCTGGAATCCTTCAATAAATCGGGCAGCTTCGATGACGAATGCAAACAAAAAATTGAGCCCAGCAAGAATATTTTCAACTTCAATCATGAATTTTCTTCAGGTGCTGAAAATGAGGCGATTCCTCCTCTGAAGGATTTCAAAAAGTCCTCAGCCAAAAGCACCAGGAGGGAGAGGGCGACTTTGTACAGAGGTATCAGGCGGCGTCCAGGGGGAAAATGGGCTGCGGAGATTCGAGATCCCAGAAAGGGCACTATGGTTTGGCTTGGAACGTTTAATACGGCAGAGGAGGCCGCTAAGGCCTAT…
PITA_05728	APFE030898030.1	scaffold61665:23849-24865(-)	MAMNSANQEIEYTEMSVLDRIRSHLLDDFEPSSCNTVWGPQEENFIHTALAADLVYNRTGGTERETETLTPAVKSSHPSLSVSVTRDEDFQWESIPIDWGFDDSVAPSMTSSLSTASTKLPLCENDSENMILCGYHNEGMPPTPKEEPVTEIKKEESFSVKREEDVRQETVAAMPNPKKNVGRHYRGVRRRPWGKFAAEIRDSARNGARVWLGTFTTAEEAALAYDRAAYKMRGSRALLNFPLQVVGEDSDIFNTMPRLEKAESSGENENELSGKKKREREEASEEVEWDRECRMRVEDEVCWGMMINELLRGTPPLTPSAIFTSFDGLLSPRQLIVN*	TCAATTGACGATAAGTTGTCGAGGGGAGAGGAGACCGTCGAAGCTCGTGAAAATGGCAGATGGTGTAAGTGGTGGTGTTCCACGTAGAAGCTCATTAATCATCATACCCCAACACACCTCATCTTCCACTCTCATTCGACATTCTCTATCCCACTCAACTTCTTCACTCGCTTCCTCACGTTCCCTCTTCTTCTTCCCACTCAATTCATTCTCATTCTCACCACTACTCTCCGCCTTTTCTAACCTCGGCATGGTATTAAATATATCACTGTCCTCCCCCACAACCTGGAGGGGGAAGTTAAGCAAAGCTCTAGATCCCCTCATCTTGTAAGCGGCACGGTCATATGCGAGCGCAGCTTCCTCCGCCGTAGTGAAAGTGCCGAGCCACACTCTGGCGCC…
PITA_05778	APFE031506666.1	C4452565:4292-6139(-)	MTSESVNNMNLVNCGKRAPDQSITTPEKSSATPPAHSKFRGVTKNRWTDRYQARLWDGTWKKQGAKRNGKPGAYDSAERAAKAYDVAAIKFWGLTAKTNFPGRDYEKEMKEMEHMTNEELVGKLRRLQWCFRDTEQAWDSVEARPSIAGLPVSDTKENESMISVLVFTDTEEEAAVAYDTAAIKHWAPHKLVATNFDVKNYDLDQIRRPELCHSKREINTCTATASEPKSACPYKFNAHIHENNLRHHAAG*	TTATCCAGCAGCATGGTGGCGGAGATTGTTCTCATGAATGTGTGCATTGAATTTATATGGACAGGCGCTTTTGGGCTCGCTGGCAGTGGCAGTACAAGTATTGATCTCCCGCTTTGAATGACATAACTCCGGACGTCGAATTTGATCGAGATCGTAATTCTTGACGTCGAAATTAGTGGCAACCAGCTTGTGCGGCGCCCAGTGCTTAATTGCCGCAGTATCATAAGCCACAGCAGCCTCCTCTTCTGTATCTGTGAAAACCAAAACAGATATCATACTTTCATTTTCTTTTGTATCTGACACTGGTAACCCCGCGATACTTGGACGTGCCTCCACAGAATCCCAGGCTTGTTCTGTGTCACGAAAACACCACTGCAATCTCCTGAGCTTCCCCACCAG…
PITA_05918	APFE030068441.1	C4465575:10227-12920(+)	MRSWGRWVSEILEPKKKSRMWLGTFPTPEMAARAHDVAALSVKGKSAFLNFPHMASSLPRPATLCPKDIQAAAALAAAEFHMPSEDDSEDRSLDPVGTSNAIPSDSHTVIPAESGNNEAATAVCASNFVSSFLSGNEWMSGCDASILLNGTSSDPSEQQATPNLTLRAAAFEIINKIKEAVEAKCSGVVSCADILALTASYAVSMGGGPEFLVPLGRRDSLTFANQTVTLASLPSPTSNVTVLMTIFTEKGFHNFTELVALSGAHTFGISHCSSFVNRLYPTQDTTLNAAFARELEHTCPTNTAVNTRNLDIRTPNVFDIKYYIDLQNGEALLTSDQDLYNDSRTRQIVNGFALNQTSFFKQFALSMPKMVQLDVLTGAEGEIRKNCAVRNTNTSSYSI…	ATGAGAAGTTGGGGCAGATGGGTTTCAGAGATTCTAGAGCCCAAGAAGAAGTCCAGAATGTGGCTGGGGACGTTCCCCACACCAGAGATGGCGGCTCGAGCCCACGACGTGGCGGCGCTCAGCGTCAAGGGAAAATCCGCGTTCCTCAATTTTCCCCACATGGCCTCGTCGTTGCCTCGCCCCGCCACATTGTGCCCCAAAGACATCCAGGCCGCTGCCGCGCTCGCTGCGGCTGAGTTTCATATGCCTTCAGAAGATGATAGTGAGGATCGATCCCTTGATCCTGTGGGGACGAGCAATGCGATCCCTAGTGATTCCCACACTGTGATCCCTGCAGAGTCGGGGAATAATGAAGCAGCAACAGCAGTTTGCGCGTCGAATTTTGTTTCGAGTTTTCTT…
PITA_06063	APFE030076414.1	scaffold127595:11148-12958(+)	MSKPQRYRGVRQRHWGSWVSEIRHPLLKTRVWLGTFETAEDAARAYDEAAILMCGPHHAKTNFTYDPNAPPCIKRSFLSAALTAKLRQCYLASLDMEMQQGTVSKDHLQSPVMTPSLTCLKLDTEKANLGIWQKRAGKQSESNWVMTVEFGSCSDQYRQPSLVKQETEDDIALEMIEELFHPTSIEFSSKSVT*	ATGTCAAAACCCCAGCGGTATAGAGGCGTGAGACAACGTCATTGGGGATCTTGGGTGTCTGAAATTCGCCATCCTCTCTTGAAAACCAGAGTGTGGCTGGGGACATTTGAGACAGCAGAAGATGCAGCCCGTGCCTACGACGAGGCTGCAATACTAATGTGTGGGCCTCATCATGCAAAGACCAATTTCACATACGACCCCAATGCACCACCATGTATCAAGCGTTCTTTTCTTTCTGCAGCACTCACTGCCAAACTCCGGCAATGCTATCTGGCTTCTCTGGACATGGAAATGCAACAGGGCACTGTGAGCAAAGATCACCTGCAATCACCTGTTATGACACCCTCTCTTACTTGTCTGAAACTGGACACAGAAAAGGCCAATCTGGGAATCTGGCAG…
PITA_06095	APFE031165448.1	scaffold89382:95864-98766(+)	MENKPDQLQAGQKRRGTAQQTITFTTHGVKENDITGQHITASSGQERPSIVTPPQHQQLNRENKTNFKRKELDPRNPPPKRHYRGVRQRPWGKWAAEIRDPKKARRVWLGTFETAEDAGRAYDDAALKFRGSRAKLNFPERINLQYEDPPCMNMPKQETAAIADFSIQVAHGTCSLTLPTNGDNCLAAPEGCGSLHVESISGETYSDRLHYGIPPPYFIPADSPCLSKFSDVYHHGHPLQANSNPSLVQQYSAYIRSQKEPEPFNQQLASMTSIQNEPALDYSRQLQITSSPNLVSSNYTGSRVSMFNNYVQQQQHMVIRQQRVRSVSTTGYEELYNFRERMVNQTSHNFLDCTPSQSESYDNLDYNSGVLPARNLKDAEL*	ATGGAGAACAAGCCCGATCAATTGCAAGCCGGGCAGAAGAGACGGGGAACTGCGCAACAGACGATCACATTCACAACGCATGGCGTCAAAGAGAACGATATTACTGGTCAGCATATTACAGCTTCATCCGGCCAAGAACGGCCAAGCATCGTCACGCCACCTCAACACCAGCAACTTAATCGAGAAAATAAGACGAACTTTAAGAGAAAGGAACTGGATCCGCGGAATCCCCCTCCAAAGAGACATTACAGAGGAGTAAGGCAGAGGCCGTGGGGAAAATGGGCTGCAGAGATTCGAGATCCAAAGAAGGCAAGACGAGTATGGCTGGGCACATTTGAGACCGCAGAAGACGCTGGGAGAGCATACGACGACGCTGCTTTAAAATTTCGAGGGTCAAGG…
PITA_06125	APFE030265935.1	scaffold96114:66149-75132(-)	MMAHLRENLHQAQNRMKQQANQHHSEGKFQEGDQVNYRGVRKRPWGKYGGVIKRRRWLGTFDTAEEAGREYDNAAKNIKGVKAKTNFPAPYLPLNNVNIQGCSPAATTSLPPSSPANHANNKNGCSANISEQITPWTHFYMND*	TCAGTCATTCATATAAAAGTGCGTCCAGGGTGTTATTTGTTCAGAGATATTAGCAGAACACCCATTCTTGTTATTGGCGTGATTAGCAGGCGAAGAGGGAGGCAGAGAGGTAGTGGCTGCAGGGCTGCATCCTTGTATGTTGACATTGTTTAGAGGGAGGTAGGGAGCTGGGAAGTTGGTCTTAGCTTTGACACCTTTTATATTTTTGGCGGCATTGTCATATTCTCTACCTGCTTCCTCCGCAGTGTCGAAGGTACCCAGCCACCTGCGTCTTTTAATTACCCCCCCATATTTACCCCAGGGTCTCTTTCTCACGCCTCTGTAATTCACCTGATCCCCTTCTTGAAATTTGCCTTCTGAATGATGTTGATTTGCTTGTTGCTTCATGCGGTTTTGAGC…
PITA_06260	APFE031355785.1	scaffold128391:1515-2358(-)	MRTNGVATREDAGCNGKWEVLNPYRNVSRKYGVAGCNALTTKTLMDVAVGASNSINMEMWNMLELIRHHLLEVEDDIDNEGTSPLIRRAEVFKVKPQPSEQENGEMKQISYRHYIGVRRRPWGKFAAEIRDPVKKGARVWLGTFNTGKEAALAYDRAAYRLRGAKALLNFPLDLASNSESGLAVGHMAHKRKRGNSSSGSGMDIELEEPSSNFS*	TCAGCTAAAATTGCTGGACGGTTCCTCCAATTCGATGTCCATGCCGCTCCCACTGCTACTGTTTCCTCTCTTCCTCTTGTGTGCCATGTGACCTACGGCCAACCCGCTCTCTGAATTGGAAGCGAGGTCGAGGGGGAAGTTCAGCAGAGCCTTGGCACCACGAAGTCTGTAGGCAGCCCGGTCATATGCGAGAGCGGCCTCTTTGCCAGTGTTGAAAGTGCCCAGCCAAACTCGAGCGCCCTTCTTGACGGGATCTCTGATTTCCGCTGCGAATTTTCCCCATGGCCGCCGCCTCACTCCTATGTAGTGCCTGTAACTGATCTGCTTCATCTCCCCATTCTCCTGCTCGCTTGGCTGTGGCTTCACCTTAAACACCTCTGCTCTTCTTATCAAGGGTGA…
PITA_06282	APFE030334495.1	scaffold16271:13462-14122(+)	MCGPEANLISFNGSLHVTPKDFNTLFINGGAVSESFKPNKNIFHFNHEFSSGGENEGIPLKDFEKYRGMKVKSCTKQPVFLFGRNINSKVKPLYSPKHDLSEGYSPLLSAENDKNSSAKSSRRKRKTFYRGLRQRPWGKWVAEIRDPRKRIMVCLGMFNTAEEAAKAYDAEAKKIKGKKAKLNFPDD*	ATGTGTGGACCTGAAGCGAATCTCATTTCCTTTAACGGGTCTCTGCATGTAACTCCCAAGGATTTCAATACGTTGTTTATCAATGGTGGAGCTGTGTCTGAATCTTTCAAGCCCAACAAGAATATTTTCCACTTCAACCATGAATTTTCTTCAGGTGGTGAAAATGAGGGGATTCCTCTGAAGGATTTCGAAAAGTACAGAGGTATGAAAGTAAAGTCGTGTACAAAACAACCTGTTTTTTTATTTGGTCGGAATATAAACAGCAAAGTAAAACCTTTATATTCACCAAAGCATGACTTATCTGAGGGTTACTCTCCTCTGCTAAGTGCTGAAAATGACAAAAATTCCTCCGCCAAAAGCAGTAGGAGGAAGAGGAAAACTTTTTATAGAGGTCTCAGG…
PITA_06552	APFE030839559.1	C4833335:19301-19914(+)	MEIPPSQEQNHGHAQPKEDSGQTTWKFKGIQLREWGKWISEIRIPRSREKIYLGSYKTVEQAAQAFDAAMYCLRVPNAKFNFHDYVPSIPSAFSLSPPQIQVAASRRPIISSQASSVSDMELSNDAQRKSEDLAFWKSLFAEPDGPQYLNLEKIPSIDEELALELIPISEEEVVVDIRLWNFEDI*	ATGGAGATACCTCCCTCGCAGGAACAAAACCACGGCCATGCTCAACCTAAAGAAGATAGCGGACAAACAACATGGAAATTTAAGGGAATCCAACTGCGAGAATGGGGGAAGTGGATATCAGAAATTCGGATACCAAGATCCAGGGAGAAGATCTATCTTGGCTCCTACAAAACCGTCGAGCAGGCTGCCCAAGCCTTTGACGCTGCAATGTATTGCCTGAGAGTGCCCAACGCTAAGTTCAATTTTCACGATTATGTGCCCTCCATTCCGTCTGCCTTTTCTCTTTCCCCTCCGCAAATCCAGGTTGCCGCTTCCAGACGACCCATCATTTCCTCGCAGGCATCTTCGGTATCTGATATGGAATTGTCTAATGATGCCCAGCGTAAATCAGAGGACTTG…
PITA_06555	APFE031008400.1	scaffold187397:158190-158937(+)	MKHACKQGLRLCSNQPNKLYRGVRQRHWGKWVAEIRLPRDRNRLWLGTFETAEEATLAYDRLSVLQSGVDAKLQAICERLSASIKTSHEGKLGHNCLDQKNSTVTHCNEKSFLEVKSECPEFSGGDNNSVLTAQNSDSVPLCKSMTNVVCNMPSISASASAVATMWADMDGVDALNRMPSLDMDMTWDVLESE*	ATGAAACATGCTTGTAAGCAGGGCCTCAGGCTCTGCAGCAATCAGCCCAATAAGCTCTACAGAGGAGTCAGGCAGAGGCACTGGGGGAAATGGGTGGCGGAGATAAGATTACCCAGAGACAGAAACAGACTCTGGCTTGGAACTTTTGAGACGGCAGAGGAGGCAACATTGGCCTATGACAGGTTATCTGTTTTGCAATCTGGAGTCGATGCCAAACTGCAAGCAATCTGTGAACGTTTATCTGCATCCATTAAAACATCCCATGAAGGAAAGTTGGGTCATAACTGTTTGGATCAAAAGAATAGCACAGTGACACATTGTAACGAGAAATCATTCCTTGAGGTGAAATCAGAATGTCCTGAATTCAGTGGGGGCGATAACAATTCAGTGTTAACAGCA…
PITA_06696	APFE031540022.1	scaffold101697:9831-11537(-)	MAAPCDWLKAVGRTNCPITPDVALRLGQCLLTAEADSSGDSSKPNYKSLAFKAMGNDLTRTDNENGMAGTEEDSSSSPVAASFLLPDKAGLEKMGNGINAAPSQNTHTPSGQRKLASSQYKGVVAQPNGRWGAQIYEKHRRVWLGTFNSEEDAARTYDKAAIKLRGDEAITNFNFADRHPEAFFLRSHSNSEIVDMLSRHTYDEELNKDDTTSFAAYPDIAWSTTKEPREHLFDKAVTPSDVGKLNRLVIPKQYAEKYLPLDQALIHDKGKGVLLNFEDSSTEKIWRFRYSYWNSSQSYVLTKGWNRFVKEKRLQAGDIVTIERASGSRRLFITFRRRPRYFLPPAVPPPSLGRCQLAINPLAAKDSPHREHLFCTPPPADVQNSSGHRLIPRVAGPNS…	TCATATTATATTACAAACCAGCGGCGACCCTGTCTCACCGTCTTTCCCATCGGAAAACAGCTCGGCGGCCGCTTCCCTCTTATTTGTGTGCTCAGTCATGCCCGGGCAAGAATTTAATGGGGACAGCTGCAGATTTACTCCAAATAGCCGGACTGAAGAAGCTTCGCAATTTCCGTCGGTGGACGGAGACGACCTTCGGTGATCTACGAAATCTAGGGACGACGGTTTCCCGTCATCTGACACAGACTTCGGGGTTAACAATAAGTTCACAGAATTAGGGCCGGCGACACGAGGAATCAAACGGTGACCGGATGAATTTTGGACATCCGCCGGTGGCGGTGTGCAAAAGAGGTGTTCCCTGTGCGGGGAATCTTTCGCAGCTAAGGGATTGATAGCCAG…
PITA_06713	APFE031437633.1	C4590829:14437-16383(+)	MQNRSRKRRSAESNNAQDSSQEESTVSNGDKQRALGVHGKRHPVYRGLRMRSWGKWVSEIREPRKKTRIWLGTFRTPEMAARAHDVAALSVRGNSAFLNFPHLASSLPRPVTLSPRDIQRAAAASAADFHMPSAEYHNEDRSRDSVGTNSCGDNVMPAEPSIPKDAAAACVCDSAWISSFLSEKESVIIDKDILFDLPNFLEYAYTLKVDDKSDVYSFGVVLLELITGRKPVGESEFGEGVDICNKSLLITRFSSFQSKNLLTAAVTVQDNEKRDIEETPRRRRRSPVFRRQGNFAPVGLSGSAPRCCAFLRPYATRLTSLSVEEAQYLEEEQYDPGMGMVSSNMQRISVWKGHRSQHLFGKAIGASTC*	ATGCAGAATAGGTCGCGCAAGCGTCGTTCAGCGGAAAGTAACAATGCACAGGATTCTAGCCAAGAGGAGTCCACAGTCAGTAATGGAGATAAACAGCGGGCGCTGGGAGTTCATGGAAAGCGGCACCCTGTTTACAGAGGCCTGAGAATGCGGTCTTGGGGTAAATGGGTGTCAGAGATTCGAGAGCCCAGGAAGAAAACCAGAATTTGGTTGGGGACGTTCCGGACGCCAGAGATGGCGGCTCGAGCCCACGACGTGGCGGCTCTCAGCGTAAGGGGGAACTCGGCTTTTCTCAATTTTCCACACCTCGCCTCTTCGTTGCCTCGCCCTGTCACATTGTCACCCAGGGACATCCAGAGGGCTGCGGCGGCCTCTGCGGCTGACTTTCACATGCCTTCA…
PITA_06934	APFE030229228.1	scaffold44548:25062-25742(+)	MRKWGKWVSEIRMPNSRGRIWLGSYDTPEKAARAYDCAVYCLRGCKARFNFPESPPEIPCASSLSPPQIQAAAFKFAAQEFRLHLEDDLASSSSRSEAESGIQRQRISVEQGPEIWDSVLENLDNFESIPFEDLSESPPEILCASSLSPPQIQAAASKFAAEELQLPLEDVAASSSSPSQAESGIEGQRISVEQDTAIWDSVLEDMDIHESTFRGFYSLTYLHGGF*	ATGAGAAAATGGGGGAAATGGGTATCAGAAATTCGAATGCCCAATTCCAGGGGCAGAATTTGGCTGGGCTCCTACGACACCCCGGAAAAGGCTGCCCGCGCCTATGACTGTGCCGTCTATTGTCTGAGAGGATGCAAGGCCAGGTTCAATTTTCCCGAGTCCCCGCCGGAAATTCCCTGCGCCTCTTCTCTATCTCCGCCGCAGATTCAAGCTGCCGCGTTCAAGTTTGCCGCACAAGAATTCCGGCTGCATCTGGAAGATGATCTGGCGTCCTCTTCCTCCCGTTCGGAAGCGGAATCCGGCATTCAAAGGCAACGGATTTCGGTGGAGCAGGGTCCAGAAATTTGGGATTCAGTTCTTGAAAACCTAGACAATTTCGAGTCCATACCTTTTGAGGAT…
PITA_06985	APFE030557374.1	scaffold121417:3-995(-)	MEVNQRRGKPGRDEVEILEESRLQNGEMEEFDTFGNLCLYIYEGNGWCNKILGVRSAMPGKWKSEIQCGGRQRISLGTFGRPEQAAKAYDAACLALRGNSAVRNFPHLRKLLPQSRSQDPKDIKEAAKQAHIIKPSSLHYGRVFDDQMTLLDAK*	TTACTTGGCATCGAGCAAAGTCATCTGATCATCAAAAACTCGACCGTAGTGAAGTGAAGATGGCTTGATAATATGTGCTTGTTTAGCTGCCTCTTTTATATCTTTGGGGTCCTGAGAACGCGATTGTGGCAATAACTTTCTTAAATGCGGAAAATTTCGCACTGCAGAGTTCCCTCTCAGAGCCAGGCAAGCAGCGTCGTACGCTTTGGCTGCCTGTTCTGGTCGACCAAAAGTACCCAGGCTGATCCGTTGACGGCCACCACATTGAATTTCAGACTTCCATTTTCCAGGCATTGCAGAACGCACACCCAATATTTTGTTACACCATCCATTTCCTTCGTAAATGTATAGGCAGAGGTTTCCGAAGGTATCGAACTCTTCCATTTCGCCATTTTGCAA…
PITA_06992	APFE031708379.1	scaffold76195:327805-329465(+)	MKFPPSIPSFRMRVPEKKTYKYPSELNTRLSISTKQEQEQCTEMSFLDQLWNYLLEDSEGKDEGSSLPSYKDEVESFIQSAVARKSIDDNRREMETDTEMLTQEHEQSTERRFLDRLGKHLFEDKVESFIQSAVARKSIDDNRREMETDTEMLTPAVSRSLLPRLRLASKLPLDENDSEDMVLYGILMNAANKGWMPTPPKEQETRTEQQPAGKKENGGRHYRGVQQEPCEKFAAEMREKNGVRHYRGVRQRRGGKFAAEIRDAARKGAKLWLGTFNSAEEAALAYDRAAYKMRGSMALLNFPIRSLLREIIHQPVNTPRRRPSITEISEPFASEQQPVQYDDGIANPVKSTSGFAQWPSVSHHSIHPVMAAPQATSSYTHADVLTGGGGRREISFRDM…	ATGAAGTTTCCACCCTCAATTCCTTCTTTCCGCATGAGAGTTCCAGAGAAAAAAACTTATAAATACCCATCAGAGTTAAACACTAGGCTTTCCATTAGCACAAAACAAGAACAAGAACAGTGCACAGAAATGAGCTTCTTGGATCAACTCTGGAACTATTTACTTGAAGATTCCGAAGGCAAAGATGAAGGATCGTCTCTGCCCTCTTATAAAGATGAAGTAGAGAGCTTCATCCAGAGCGCAGTGGCAAGAAAATCCATCGACGACAACAGACGGGAAATGGAAACGGACACCGAAATGCTGACACAAGAACACGAACAGTCCACAGAAAGGAGATTCTTGGATCGACTCGGGAAACATTTATTTGAAGATAAAGTAGAGAGCTTCATCCAGAGCGCA…
PITA_07517	APFE030463186.1	scaffold211077:1873-2877(-)	MKGGNREARSSAVGQENGGLRNPPSAPPSRKRKCKGKGGPDNIKFQYRGVRQRSWGKWVAEIRQPGKRTRRWLGTFATAEQAAQAYDNAAILLYGSRAHLNLQPSGWDHSKSSHTSKLRPLLPRFTFKFPPAIHATNPNPNPNFFGAIPSGYLQTPLNPDFWPAGMKAAHTDVTYNHPVIDPKRETTLEQRSVFQLEEIRVPTQQCNGAEVLHRESSPLKTDKVQENFGTENVDLQSDRLGDPDQLSGIHGGIVGDEINQGFYSETTGNITEPRNHIDGESRDDNLAASLQELQYSAAPPSPGFMWHYDIKHDYYYDETNSSTLPETNNQLWEF*	TCAGAACTCCCAAAGTTGGTTGTTTGTCTCAGGCAACGTGCTGCTGTTGGTCTCGTCGTAGTAATAATCGTGTTTTATATCATAGTGCCACATGAAACCAGGTGAAGGAGGCGCAGCACTGTACTGCAACTCCTGCAAGGAAGCAGCAAGATTATCATCTCTCGATTCTCCATCAATATGGTTTCTTGGCTCGGTAATATTTCCAGTGGTTTCGCTGTAGAAACCTTGATTGATCTCATCGCCGACGATACCCCCATGAATCCCAGAGAGCTGATCAGGATCACCCAGTCTATCAGATTGCAGATCCACATTCTCGGTTCCGAAATTTTCTTGGACCTTATCTGTCTTCAATGGAGAGGATTCACGGTGCAGTACTTCCGCGCCATTGCACTGCTGTGT…
PITA_07540	APFE030290719.1	scaffold124053:25849-26547(-)	MAINGNGAPLKQIRKTRGSKKGCMKGKGGPENALCNYRGVRQRTWGKWVSEIREPNRGARLWLGTFDTAQEAALAYDDAARALYGSDANLNLPDSIKKPTGFQTQSACNNNIQSDGYVNTIPDAKDKEVSLSVADEIKVDDIPPLINVSSSTHEPLVELLSMDYQGVNFLEGLELENISSIQSTSGAINDQISSLDFIDEDDSSQLFNGDVAWPALDLPPLNDGTATSFDLP*	TTATGGCAGGTCAAAGCTAGTTGCAGTACCATCATTCAGAGGGGGGAGATCAAGGGCAGGCCAAGCCACATCACCATTAAAAAGCTGAGAAGAATCATCCTCATCTATGAAATCCAAGCTTGAAATTTGATCATTGATAGCACCGCTAGTACTTTGAATGCTGCTTATGTTCTCCAATTCCAGGCCTTCCAAGAAATTGACCCCTTGGTAATCCATGGAGAGCAATTCAACCAGAGGTTCATGGGTACTGCTACTCACATTGATCAATGGGGGGATATCGTCAACCTTAATTTCATCTGCAACTGACAGTGACACTTCTTTGTCCTTGGCATCTGGTATAGTATTAACATACCCATCAGATTGAATATTGTTATTGCATGCAGATTGAGTCTGGAATCC…
PITA_07979	APFE030543912.1	scaffold82012:62699-63613(+)	MTTQSARVRVTRPARRMEVNQRRGKPGRDGVEILEECRLRNGEMEEFDTFGNLRLYIYEGNGRCNKILGVRSAMPGKWKSEIRCGGRQRISLGTFGRAEQAARAYDAACLALRGNSAVRNFPRLRKLLPQSRSQDPKDIKEAAKQATSETVSASLSLAETLAASGDI*	ATGACAACCCAAAGCGCAAGGGTTCGAGTTACACGCCCTGCTCGCAGGATGGAGGTGAATCAGAGGAGAGGAAAACCTGGGCGCGACGGAGTTGAAATACTGGAGGAGTGCAGGTTGCGAAATGGCGAAATGGAAGAGTTCGATACCTTCGGAAACCTCCGCCTATACATTTACGAAGGAAATGGACGGTGTAACAAAATATTGGGTGTGCGTTCTGCAATGCCTGGAAAATGGAAGTCTGAAATTCGATGTGGTGGCCGTCAACGGATCAGCCTGGGTACTTTTGGTCGAGCAGAACAGGCAGCCAGAGCGTACGACGCTGCTTGCCTGGCTCTGAGAGGGAACTCTGCAGTGCGAAATTTTCCGCGTTTAAGAAAGTTATTGCCACAATCGCGTTCT…
PITA_08577	APFE031642288.1	scaffold102619:16457-17421(+)	MGRPQKYRGVRQRHWGSWVSEIRHPLLKTRVWLGTFETEEDAARAYDEAAILMCGPHHAKTNFTYDPNALPSTKPSFLSAALTAKLRQCYLASLNIEMQEGTANKHHLQSPVMTPSLTCLRLDTEKSNLGVWQKRAGKQSRSNWVMTVKFDSCSDRDRQPALKQETEDDVALEMIQELLHPTSIEFSSQADTSSYMCNGQALQ*	ATGGGGAGGCCGCAGAAGTATAGAGGTGTGAGGCAACGCCATTGGGGTTCTTGGGTGTCTGAAATTCGTCATCCCCTCTTGAAAACAAGAGTCTGGCTGGGGACTTTCGAGACAGAAGAAGATGCAGCCCGTGCCTACGATGAAGCAGCAATACTAATGTGCGGTCCTCATCATGCAAAGACCAATTTCACATACGACCCCAATGCATTGCCATCAACCAAGCCTTCTTTTCTCTCTGCAGCGCTCACTGCCAAGCTTCGTCAATGTTACTTGGCTTCCCTCAACATTGAAATGCAGGAGGGTACTGCCAACAAACATCACCTGCAATCACCCGTTATGACACCCTCTCTTACTTGCCTGAGATTGGACACAGAGAAGTCCAATCTTGGAGTGTGGCAG…
PITA_08629	APFE030975301.1	C5027389:48511-48894(+)	SGGRHFRGVRRRPWGKYAAEIRDSARQGSRVWLGTFDTAEEAAFAYDRAAYKMRGTKALLNFPLDLVAKSMDSLSEDESCCRKRKLNGQAQRGEEKRHHHGPNFEECGVESQESIVVEDGEQKRFRR*	AGCGGGGGAAGGCATTTCCGGGGTGTGAGACGGCGGCCGTGGGGTAAATATGCGGCGGAGATAAGGGACTCTGCGCGGCAGGGATCTAGAGTGTGGCTCGGTACCTTCGACACGGCGGAGGAAGCCGCCTTTGCATATGATCGCGCCGCTTACAAGATGAGGGGCACTAAGGCCTTGCTCAATTTTCCCCTTGATTTGGTTGCTAAGTCCATGGATTCCCTCAGTGAGGATGAGAGTTGCTGTAGAAAGAGGAAATTGAATGGGCAAGCACAGAGGGGAGAAGAAAAGAGGCACCACCATGGGCCGAATTTCGAAGAGTGTGGGGTGGAATCTCAGGAATCGATCGTGGTGGAGGATGGAGAGCAGAAGAGATTTAGACGATGA
PITA_08733	APFE030553216.1	scaffold166901:116414-119109(+)	MCGGAIIADFIPANRSRRVTPRDLWPDFDTFADLFINGGAMSESVNKSDSFDEGYKKKNKPSNNIFNSKQEFSSGGENEAIPPLKDFEIPPLKDFEKSPAKSAGRTKSNLYRGIRQRPWGKWAAEIRDPRKGIRVWLGTFNTAEEAAKAYDAEAKKIRGKKAKLNFADGSCSVKVDSRNKMLRKKVKSCAKNPDLLLALNIKSKVKSSYSPKPDLLKDCYLQKECSLKDARRSDLSIYGYDDMEYGDSQLINSPAPFQSNSNASAVQSSEHSHASQNSQKSCSCELCSLNYSEVSNFMFPAYGDTPKFEPVESSYPVGYFDSDHSSNSFDEEHFSWAHEMKTPEISCVYNDDGHESVFVDIKPPVHGVVKDRPVDTSINVNSGTESFGVDTSMEVNDGT…	ATGTGTGGAGGTGCTATTATTGCGGATTTCATTCCCGCCAACAGATCCCGGCGTGTAACTCCTAGGGATTTATGGCCGGATTTCGATACCTTCGCTGACTTGTTCATCAATGGCGGCGCCATGTCGGAATCCGTCAATAAATCGGACAGCTTCGACGAGGGATACAAGAAGAAGAATAAGCCCAGCAACAATATTTTCAACTCCAAGCAAGAATTTTCTTCAGGTGGTGAAAATGAGGCGATTCCTCCATTGAAGGATTTTGAGATTCCTCCTTTGAAGGATTTCGAAAAATCCCCCGCCAAGAGCGCGGGGAGGACGAAGTCGAATTTGTACAGAGGTATCAGGCAGCGTCCATGGGGAAAATGGGCTGCGGAGATTCGAGATCCCAGAAAGGGCATT…
PITA_08829	APFE031160403.1	super987:271488-272840(-)	MALKTACRHGAEGSYDYRQQHGLSVSAERLLEDVWAHFINAAGSDHLIHDDELQPAASSNHNANEGSCWWNPEISVLPLKENDSDDMMLFELLKEAAKHGWSASHQQQQETAISGSTARTPAICKTQAIGPQGEVTEKSSTKRYRGVRRRPWGKFAAEIRDSARQGARVWLGTFNTAEEAAMAYDKAALLIRGTRASLNFPVDVVTKALADTNYTCTSKLISSRQKRIKVSDAHFELRNKMEAPDVDSPVADFKKMEAPDVDSLVTDFKKYIAEEDDGMTTMRQKRMRESSTSRSADHMQETEVLYTWRQKDAKKGIRQHLQPLVQ*	TTACTGCACAAGCGGCTGAAGGTGCTGCCGTATTCCCTTCTTGGCATCCTTCTGGCGCCATGTATAGAGAACCTCTGTTTCTTGCATGTGATCAGCACTTCTGCTTGTACTACTCTCTCTCATTCTTTTCTGCCGCATGGTAGTCATTCCATCATCTTCTTCTGCAATATATTTCTTAAAATCCGTTACAAGAGAGTCTACATCTGGTGCCTCCATTTTCTTAAAATCCGCTACAGGAGAGTCTACATCTGGTGCCTCCATTTTGTTTCTTAATTCGAAATGAGCATCAGAGACTTTGATGCGCTTCTGCCGAGAAGATATAAGCTTAGAGGTGCATGTGTAATTAGTGTCTGCCAAAGCCTTCGTCACGACATCGACAGGAAAGTTTAAAGACGCCCG…
PITA_09250	APFE031681176.1	C4651453:4001-5788(-)	MTSESVNNMNLVNCGKRAPDQSITTPEKSSATPPAHSKFRGVTKNRWTDRYQARLWDGTWKKQGAKRNGKPGAYDSAERAAKAYDVAAIKFWGLTAKTNFPGRDYEKEMKEMEHMTNEELVGKLRRLQCCFRDTEQAWDSVEARPSIAGLADTEEEAAVAYDTAALKHWGPHKLVATNFDVKNYDLDQIRRPELCHSKREINTCTATASEPKSACPYKFNPHIHENNLRHHAVG*	TTATCCAACAGCATGGTGGCGGAGATTGTTCTCATGAATGTGTGGATTGAATTTATATGGGCAGGCGCTTTTGGGCTCGCTGGCAGTGGCAGTACAAGTATTGATCTCCCGCTTTGAATGACATAACTCCGGACGTCGAATTTGATCGAGATCGTAATTCTTGACGTCGAAATTAGTGGCAACCAGCTTGTGCGGCCCCCAGTGCTTAAGGGCCGCAGTATCATAAGCCACAGCAGCCTCCTCTTCTGTATCTGCTAACCCCGCGATACTTGGACGTGCCTCCACAGAATCCCAGGCTTGTTCTGTGTCACGGAAACAACACTGCAATCTCCTGAGCTTCCCCACCAGTTCTTCATTAGTCATGTGCTCCATCTCTTTCATCTCTTTTTCATAGTCCCT…
PITA_09315	APFE031666172.1	scaffold157671:379594-380630(+)	MTTQSARVRVTRPARRMEVNQRRGKPGRDGVEILEECRLRNGEMEEFDTFGNLRLYIYEGNGRCNKILGVRSAMPGKWKSEIRCGGRQRISLGTFGRAEQAARAYDAACLALRGNSAMRNFPRLRKLLPQSRSQDPKDIKEAAKQATSETVSASLSLAETLAASGDIEEQEQQSTTSASFSLAETAAGAYDSACLALKGDDAVLNFQY	ATGACAACCCAAAGCGCAAGGGTTCGAGTTACACGCCCTGCTCGCAGGATGGAGGTGAATCAGAGGAGAGGAAAACCTGGGCGCGACGGAGTTGAAATACTGGAGGAGTGCAGGTTGCGAAATGGCGAAATGGAAGAGTTCGATACCTTCGGAAACCTCCGCCTATACATTTACGAAGGAAATGGACGGTGTAACAAAATATTGGGTGTGCGTTCTGCAATGCCTGGAAAATGGAAGTCTGAAATTCGATGTGGTGGCCGTCAACGGATCAGCCTGGGTACTTTTGGTCGAGCAGAACAGGCAGCCAGAGCGTACGACGCTGCTTGCCTGGCTCTGAGAGGGAACTCTGCAATGCGAAATTTTCCGCGTTTAAGAAAGTTATTGCCACAATCGCGTTCT…
PITA_09364	APFE031631153.1	C4404905:4728-6578(+)	MTSESVNNMNLVNCGKRAPDQSITTPEKSSATPPAHSKFRGVTKNRWTDRYQAHLWDGTWKKQGAKRNGKPGAYDSAERAAKAYDVAAIKFWGLTAKTNFPGRDYEKEMKEMEHMTNEELVGKLRRLQWCFRDTEQAWDSVEARPSIAGLPVSDTKENESMIISVLVFTDTEEEAAVAYDTAAIKHWAPHKLVATNFDVKNYDLDQIRRPELCHSKREINTCTATASEPKSACPYKFNAHIHENNLRHHAAG*	ATGACTTCTGAATCTGTCAACAACATGAATCTTGTAAACTGTGGAAAGAGGGCTCCCGATCAGAGTATCACTACTCCGGAGAAGAGTAGTGCTACCCCTCCTGCACATTCTAAGTTTCGTGGGGTCACCAAAAATAGGTGGACGGATAGATACCAAGCCCATCTTTGGGACGGTACCTGGAAAAAGCAGGGTGCCAAGCGAAATGGTAAACCAGGTGCATACGATTCGGCAGAACGCGCAGCAAAAGCTTACGATGTTGCAGCGATTAAATTCTGGGGTTTAACTGCCAAAACCAACTTTCCAGGGAGGGACTATGAAAAAGAGATGAAAGAGATGGAGCACATGACTAATGAAGAACTGGTGGGGAAGCTCAGGAGATTGCAGTGGTGTTTTCGTGAC…
PITA_09926	APFE030919250.1	scaffold208250:2690-6898(-)	MSLHTSTSTPPRLPSAIHARLRLPPTFLLYSPRCGVLVQPGRLKMGIGSAASTNGAAITTPAFARLVQVVRRRSTAFDRVKICSTPAQMQRNLRLYIYEGNGRCNKILGVRSAMPGKWKSEIRCGGRQRISLGTFGRAEQAARAYDAACLALRGNSAVRNFPRLRKLLPQSRSQDPKDIKEAAKQATSETVSASLSLAETLAASGDIEEQEQQSTTSASFSLAETAAGAYDSACLALKGDDAVLNFQYLINLFPPSCSRNTNDIKETARQVVHLFCRKKNDAYSF*	CTAAAAAGAATACGCATCGTTCTTCTTTCGACAAAATAAATGAACGACTTGTCTAGCTGTCTCTTTTATGTCGTTGGTGTTCCGAGAGCACGATGGTGGGAATAAATTTATTAAATACTGGAAATTTAGCACTGCATCGTCTCCTTTCAGAGCTAGACAAGCACTGTCGTAGGCTCCGGCTGCGGTTTCTGCCAGTGAAAACGATGCACTGGTAGTGCTCTGTTGTTCTTGTTCTTCAATATCCCCCGATGCAGCTAAGGTTTCTGCCAACGAAAGCGATGCACTAACTGTTTCAGATGTTGCTTGTTTAGCTGCCTCTTTTATATCTTTGGGGTCCTGAGAACGCGATTGTGGCAATAACTTTCTTAAACGCGGAAAATTTCGCACTGCAGAGTTCCC…
PITA_10070	APFE031327907.1	C5031455:13038-14577(+)	MCSRGVAEETQRVGRMEQMALWHECSFENPAQHGGCQLAPPARRWWVAHSRKTYDAMGRPAARETMDAGWKGMACIRSLISQGNCPESYADFGSNCDLLIAYTGVYIERERYFISPHLTAFPFGKLCRQPQFFVITLQYTYIFLSYYFHPSYQRDSESPNMEIPPSQEQNHGHAQPNEVSGQTSRQFKGIRLREWGKWVSEIRIPRSRDKIYLGSYKTAEQAARAVAAAMYCLRGPNAKFNFPDSVPAIPSAFSLSPPQIQVAASKYALNEIPGTSPSLHNNTKDDPSLPSQASLVSDMELSNDAKHKSEDLAFWKSLFAEPDGPQYLNLGKIPSIDEELALVLIPTSEEEEVVDIRLWNFEDN*	ATGTGCTCGAGAGGGGTTGCAGAGGAAACTCAACGGGTTGGGCGAATGGAGCAAATGGCTCTTTGGCACGAATGCTCGTTTGAAAATCCTGCCCAGCACGGCGGGTGCCAGCTTGCGCCGCCAGCTCGGAGGTGGTGGGTCGCCCATTCCCGGAAAACTTATGATGCGATGGGCCGTCCCGCGGCCAGAGAAACGATGGATGCGGGATGGAAAGGCATGGCATGTATCCGTAGTCTAATTAGCCAGGGGAATTGCCCGGAAAGTTATGCAGATTTCGGATCCAACTGTGATTTGCTGATTGCATACACTGGTGTATATATAGAGAGGGAACGATATTTCATTTCCCCGCACTTAACGGCCTTTCCATTTGGCAAGCTCTGTCGACAGCCTCAATTTTTT…
PITA_10393	APFE031404527.1	scaffold192426:28939-33067(+)	MGSVNNWLGFSLSPNMTVELQDSSQSQSASAVTVATSSMVHSSVADPGNMNIGFGSSRDCFSHNAPPPPPMHMHIPPEMTLRSDGSLYILDSINRSQNEDWHLKNLEQTRSMQDAAESQQHLISADLSMLVGGRSDHMCSDSRYDHSMICQSTSNNNRRHDGEGPKLEDFLGGASLGGGGQYSESRTSEISQQPPGANLNDMYGTAAPSFNDGDIKSSFMSDSARLNCFHAFDIADSELSATNSSKRSDDQHSIKAESLSGVSAIHSLNLRDSYDHNSNEYIFPECTLQLPQTSGVNNNNINGLSMIKTWLRTQPTSSSAESKMTNTVNTNYGNAASCSTITTTTTTNPEQQPKEGMDALTNIQSLKLSMSPTSQSTTSLAIVPAATTQNGTLETSLSD…	ATGGGGTCGGTGAACAATTGGCTAGGGTTCTCACTTTCCCCCAATATGACGGTGGAGTTGCAGGATTCGAGCCAGTCGCAATCGGCGTCGGCTGTGACGGTGGCAACCAGCAGTATGGTGCATTCCAGTGTGGCTGACCCGGGCAATATGAACATAGGGTTCGGGAGCAGCAGAGATTGCTTTTCTCATAATGCTCCCCCGCCGCCTCCTATGCACATGCATATTCCTCCAGAAATGACTCTCAGGTCTGATGGGTCGCTCTACATTCTGGACTCCATCAACCGGTCCCAAAACGAAGATTGGCATCTCAAGAACCTGGAGCAAACGAGGAGCATGCAGGATGCTGCTGAGTCCCAGCAACATTTGATCAGCGCGGATCTTTCAATGTTGGTCGGAGGC…
PITA_10423	APFE031126961.1	C4012673:5118-6897(-)	MTSESVNNMNLVNCGKRAPDQSITTPEKSSATPPAHSKFRGVTKNRWTDRYQARLWDGTWKKQGAKRNGKPGAYDSAERAAKAYDVAAIKFWGLTAKTNFPGRDYEKEMKEMEHMTNEELVGKLRRLQWCFRDTEQAWDSVEARPSIAGLPVSDTKENESMIISVLVFTDTEEEAAVAYDTAAIKHWAPHKLVATNFDVKNYDLDQIRRPELCHSKREINTCTATASEPKSACPYKFNAHIHEYNLRHHAAG*	TTATCCAGCAGCATGGTGGCGGAGATTGTACTCATGAATGTGTGCATTGAATTTATATGGACAGGCGCTTTTGGGCTCGCTGGCAGTGGCAGTACAAGTATTGATCTCCCGCTTTGAATGACATAACTCCGGACGTCGAATTTGATCGAGATCGTAATTCTTGACGTCGAAATTAGTGGCAACCAGCTTGTGCGGCGCCCAGTGCTTAATGGCCGCAGTATCATAAGCCACAGCAGCCTCCTCTTCTGTATCTGTGAAAACCAAAACAGATATTATCATACTTTCATTTTCTTTTGTATCTGACACTGGTAACCCCGCGATACTTGGACGTGCCTCCACAGAATCCCAGGCTTGTTCTGTGTCACGAAAACACCACTGCAATCTCCTGAGCTTCCCCAC…
PITA_10671	APFE031531036.1	scaffold209594:62016-66788(-)	MKHMNNWLAFSLSPHLAIDVGNTTQAQAHAQASSNATCYSVNNNNEVPQSTMGYQTSAECYGINTANGHFSSQMSELPLRSDGSLCIMEALGRSQSAILWFAISLDWHLKHLEAPRTLQGDGSGLQSSQQLLNRELPRFSRNNGTDHNMPRSSQYDTNMAPQNGSEREGPKLEDFLGGASLGNQYSTNHEAHSQAGLDGMYYAGAGFHREHNNEKINVNLPFMHCRQREVPSPWIDSQAYEAQPRSLQMQQEHHDLCEFVQESQQMPFQVQLDPNSNDTMFADCSLQLPPGSGMVGLSALKTWLRQNPSNADHHKVVPSGSGSPGKSNLGGGLGDFQSLTLSMSPGSQNSSAIISQPTIIDQCTPVETKKRGAGKAGTREPVPRKSIDTFGQRTSQYRG…	TCATTCATTCCATAATGCAAACATGGGCAAATGCCCCACAGAGAGATTGGGCCTTGATTGTAGTGGTGGTACTGTATTTGGTGGAATCATCCATGGACTGAGAGTGGTACTGCCATTCTCATATTTCACGAGCTTCGAAGCTTGCTGCGGGGATGAGAAGAACAAGGCTTGGGGGAATTCTCCTGATGGCATCATATTGTCATAGACCGGGATTTTGCGATGGTGGCCCTCTTCATTCTCGCTAGCAGAATTTACTGGGCTCTCCACAGGGCCTGTATTAGATGCATTGCTCATTGTGAGAAGAGAATTGTTACCACCAGAGATATCAGTGAGCAAACGACTAGTTTCCTCGTTATTGGACTGATCAGAATCTGCTGCTGTAGATGAATCCAACCCAAT…
PITA_10698	APFE030704750.1	scaffold119797:116055-117527(+)	MKSQQQSELQKNVSLSPSKLSEKQFKRGKEAGRYRGVRRRPWGRFAAEIRDPKTKERRWLGTFDTAEEAAYAYDFAARAMRGIKARTNFIYLNSEHCVLSTAPVAHTVTPFPTNIKDPFSHKPQKLQDSWPDYLWRDPSTNRPGPCNEPKQQQQKQQFGFNGGYNMLGNIVMNSCLRPSKNEIANNNVQSLSGAGSRSVVPVSLPRDHHSYNTNSWQNLPRADPILLSSSKHSIDQTHHSTISSSVSSSTTCSTVTKISDHQPASFNNNITTIPATVMSLSNPVENAYFLPCLEEPSSEVCSPVSPYAYALSSNVEHQFQNLADSNGSSDSGLLDQIISGYFPLSVSTSPASSVCSPKGININNTFDHGVRVPQENYSTITTASTGFDTSDHFMADLER…	ATGAAGTCCCAGCAGCAGTCAGAGTTGCAGAAGAATGTAAGTCTGAGCCCTAGCAAGCTCTCAGAGAAGCAGTTCAAGCGGGGGAAGGAGGCTGGTAGATACAGAGGTGTCCGCAGGCGCCCATGGGGTCGTTTTGCTGCAGAAATTCGTGACCCAAAAACCAAAGAACGTCGGTGGCTTGGAACATTCGACACTGCAGAGGAAGCAGCATATGCTTATGACTTCGCTGCAAGAGCCATGAGGGGGATCAAGGCGCGGACCAACTTCATATATCTCAATTCAGAGCACTGTGTCCTATCAACAGCTCCTGTAGCTCATACTGTTACTCCCTTTCCCACTAATATCAAAGACCCATTTTCACACAAGCCTCAAAAGCTGCAAGACTCGTGGCCTGATTAC…
PITA_10968	APFE031236525.1	scaffold201970:36179-37943(-)	MSGSGVAVPVQAALCNLPKVAGNDSCDLGLRLGRCYGPVKDESSSNSREPESKWTAVCRKKAMGDDSTITDKEEAGSVIEDDSNSLPAPVGNSVCSNSSSFVGQTELERMGSGISAVSSENTNMPSVQGEKNYSKKLPSSQYKGLVLQPNGRWGAQIYEKHKRVWLGAFNREEDAARAYDRAARKFRGPDAITNFNFPESHPEAVFLRGHSKYEIVDMLRKHTYDEELDQNKSCSHINPEVARSNHLEPREHLFDKTVTPSDVGKLNRLVIPKQHAEKYFPLDVASGGSKGKGVLLSFEDGTDKTWRFRYSYWHSSQSYVLNKGWSCYVKEKRLQAGDIVTFERGSSSRHLFIAFRHRPCSFIPPAAGPAVSKRCPLSVDPFAVAEYPHRGQLFYAAPP…	TCAGCTTCTTTGTGTTTCCACGGCGGTCTTCCTCGATTCCACTGCCCGGAAAATATTTAACGGCGACCGCTTTAAGTTTACTCCAAATAGCCGGACGGCAGAAGAAGAAAGAAAATCACCGTCTGTGGACAGAAAAGCCTTGTCGAGATTCACGAAGACCGGCGACAATGGATTCCCGTCATTTGACGCAGTCGGCTCGAGCGCCTTGGAATCATGGAAGTTGAGATAATCGTGGCTGGCGCGGGCCGGAATCCAACGTTGAACAACGGTGTTCATGAGCGGCGGCGCTGCGTAGAAAAGTTGCCCCCGGTGCGGATACTCGGCCACGGCGAAGGGGTCGACGGACAGCGGACAGCGTTTGGAGACCGCCGGCCCCGCGGCCGGGGGGATGAAACTGCA…
PITA_11141	APFE031651060.1	scaffold108116:23734-24252(+)	MDRQKKKKRVCNEAESTGPYPNYRGVRRRGWGKWVSEIREPRKKRRIWLGSYDTPQMAARAHDVAALCLRGKAAFLNFPDLVNAFPRPSSLDPCDIQSAAAEAARAFNTETSFLQSSSFQGSIEYQDNCNTPSESLRETTNRPDRAENSELELRLDLWWPAKKYSNKTVITE*	ATGGACCGTCAGAAGAAGAAGAAGAGAGTCTGCAACGAAGCAGAGAGCACTGGACCATATCCAAACTATAGAGGCGTTCGTCGCCGGGGATGGGGTAAATGGGTGTCTGAAATTCGCGAACCCAGAAAGAAAAGAAGGATTTGGCTGGGTTCCTATGATACTCCTCAGATGGCAGCTCGAGCCCATGACGTTGCTGCTCTATGCTTGAGAGGCAAGGCCGCTTTCCTCAACTTTCCAGATTTAGTGAACGCGTTTCCTCGCCCGTCTTCGTTAGATCCGTGTGATATACAGTCAGCGGCTGCCGAAGCTGCCCGCGCCTTCAACACAGAGACATCTTTTCTTCAAAGCTCTAGCTTTCAGGGGAGCATAGAGTACCAGGATAATTGCAACACACCAAGC…
PITA_11146	APFE031143314.1	C4609169:4675-5754(+)	MHDLDRMLAAMETWIKPEAGRHRRRTGTGIAADTTMDAVEGASNNINIEMWNMLELIRHHLLEVEDEIDIEGGNQLVSSSISSTFVANASRLTSDNEFAETEEYSSSSCSSVCTVTKSEEAFKGKPKAHDEGNKERHYRGVRRRPWGKFTAEIRDPAKKGSRIWLGTFNSAEEAAVAYDRAAFRIRGARALVNFPLAFASNSENESTVGHMGQKRKRGNNSGGKELGGVLG*	ATGCACGATCTGGACAGGATGTTGGCGGCGATGGAGACGTGGATCAAACCGGAGGCGGGCCGGCACCGGAGGCGGACAGGAACGGGCATTGCTGCAGACACAACCATGGACGCTGTAGAAGGGGCGAGCAACAACATCAACATCGAAATGTGGAATATGTTAGAGTTGATCCGCCACCATTTGCTAGAAGTGGAGGATGAAATAGATATTGAAGGAGGAAATCAATTAGTGTCATCGTCCATCTCCTCCACATTCGTAGCCAATGCCAGCAGATTAACATCTGATAATGAATTTGCAGAAACAGAAGAATATTCCTCGTCTTCTTGCTCTTCTGTGTGCACAGTTACAAAAAGTGAAGAGGCATTTAAGGGGAAGCCGAAGGCACATGACGAGGGGAAT…
PITA_11766	APFE031681176.1	C3847221:3109-4910(-)	MTSESVNNMNLVNCGKRAPDQSITTPEKSSATPPAHSKFRGVTKNRWTDRYQARLWDGTWKKQGAKRNGKPGAYDSAERAAKAYDVAAIKFWGLSAKTNFPGRDYEKEMKEMEHMTNEELVGKLRRLQWCFRDTEQAWDSVEARPSIAGLADTEEEAAVAYDTAALKHWGPHKLVATNFDVKNYDLDQIRRPELCHSKREINTCTATASEPKSACPYKFNPHIHENNLRHHAVG*	TTATCCAACAGCATGGTGGCGGAGATTGTTCTCATGAATGTGTGGATTGAATTTATATGGGCAGGCGCTTTTGGGCTCGCTGGCAGTGGCAGTACAAGTATTGATCTCCCGCTTTGAATGACATAACTCCGGACGTCGAATTTGATCGAGATCGTAATTCTTGACGTCGAAATTAGTGGCAACCAGCTTGTGCGGCCCCCAGTGCTTAAGGGCCGCAGTATCATAAGCCACAGCAGCCTCCTCTTCTGTATCTGCTAACCCCGCGATACTTGGACGTGCCTCCACAGAATCCCAGGCTTGTTCTGTGTCACGAAAACACCACTGCAATCTCCTGAGCTTCCCCACCAGTTCTTCATTAGTCATGTGCTCCATCTCTTTCATCTCTTTTTCATAGTCCCT…
PITA_11770	APFE031506666.1	C4419565:8576-10381(-)	MTSESVNNMNLVNCGKRAPDQSITTPEKSSATPPAHSKFRGVTKNRWTDRYQARLWDGTWKKQGAKRNGKPGAYDSAERAAKAYDVAAIKFWGLTAKTNFPGRDYEKEMKEMEHMTNEELVGKLRRLQWCFRDTEQAWDSVEARPSIAGLAVSDTKENESMISVLVFTDTEEEAAVAYDTAAIKHWAPHKLVATNFDVKNYDLDQIRRPELCHSKREINTCTATASEPKSACPYKFNAHIHENNLRHHAAG*	TTATCCAGCAGCATGGTGGCGGAGATTGTTCTCATGAATGTGTGCATTGAATTTATATGGACAGGCGCTTTTGGGCTCGCTGGCAGTGGCAGTACAAGTATTGATCTCCCGCTTTGAATGACATAACTCCGGACGTCGAATTTGATCGAGATCGTAATTCTTGACGTCGAAATTAGTGGCAACCAGCTTGTGCGGCGCCCAGTGCTTAATTGCCGCAGTATCATAAGCCACAGCAGCCTCCTCTTCTGTATCTGTGAAAACCAAAACAGATATCATACTTTCATTTTCTTTTGTATCTGACACTGCTAACCCCGCGATACTTGGACGTGCCTCCACAGAATCCCAGGCTTGTTCTGTGTCACGAAAACACCACTGCAATCTCCTGAGCTTCCCCACCAG…
PITA_12274	APFE030346063.1	scaffold218573:64708-67694(-)	MENKPDQLEAGQKRRETAQQTITFTTHGIKENDITGQHITASSGQERPSVTPPQHQQRENKRNFKRKELDPWNPPPKRHYRGVRQRPWGKWATEIRDPKKATRVWLGTFENAEDAGRAYDDAALKFRGSRAKLNFLERINLQYEDPPCMNMPKQETATIADFGIQVAHGTCSLTLPTNGDNGSAAPEGCGSLHVESISGETYSDRLHHGIPPRYFMLADSLYLSKFSDVYHHGQPLQANSNPSLVQQYSAYIRSQKEPEPFNQQLASMTSIQNEPALDYSRQLQITSRPNLVSSNYTGSRVSMFNNYVQQQQHMLIRQ*	CTATTGACGAATAAGCATATGTTGCTGCTGCTGCACATAGTTATTGAACATGGATACCCTCGAACCTGTGTAATTCGATGAAACTAAATTAGGCCTACTTGTAATTTGCAGTTGTCGACTATAATCCAGGGCTGGTTCGTTTTGGATGGAAGTCATAGAAGCCAGTTGTTGATTAAAAGGTTCTGGTTCCTTCTGAGATCTTATATAAGCGGAATACTGCTGCACTAAACTAGGGTTAGAATTAGCTTGCAGTGGTTGGCCATGGTGATATACATCTGAAAATTTTGATAAATACAGTGAGTCAGCTAGCATGAAATACCGCGGCGGAATCCCATGGTGGAGTCGATCAGAATACGTTTCTCCACTTATGCTTTCCACGTGTAGACTACCACAGCCTTC…
PITA_12322	APFE031422910.1	C5161557:10232-13713(-)	MRHGSTAAVEVMEEAIDTSQVKLPTPQRNPQPEKMNATAGPSAPSKDYEAGRYRGVRKHPWGRFAVEICDPKTKEGWWLGTFDTAEEATYAYDFAVTVMRGMRARTNFIYLNSDHCIPSMPPPAALTSTTFPTNIRDPFSERPQKLQDSSTTNPVSLQRSQEVAAETIVQFK*	TCATTTAAACTGAACTATTGTTTCTGCCGCTACTTCTTGGCTTCGCTGCAGGGAGACAGGATTAGTGGTGCTGGAATCTTGCAACTTTTGAGGCCTTTCTGAAAATGGGTCTCTGATATTAGTGGGAAATGTAGTACTAGTAAGAGCTGCAGGAGGAGGCATTGATGGGATACAGTGATCTGAATTGAGGTATATGAAGTTGGTCCTCGCCCTCATCCCCCTCATGACTGTTACAGCGAAATCATAAGCATATGTTGCTTCCTCTGCGGTGTCGAAGGTTCCAAGCCACCAACCTTCTTTCGTTTTGGGATCACAAATTTCTACGGCAAAACGACCCCATGGATGCTTGCGGACACCTCTATATCTACCAGCCTCATAATCTTTACTAGGAGCACTTGG…
PITA_12511	APFE030982444.1	scaffold39400:221894-222844(-)	MCGGEADFISLARSSRDFDTFADLFINGGASKTDTSKKSEWCSFDDWFINGGASKANTSKNSGFINGGASKANTSKKSGFINGGASKANTSKKSEWWSFDELFVNGGAVSESFNKSGSFDEEYKQKIEPSKNIFNFNHEFSAGAENEAIPPLKDFKIPPLKYIEKSSAKSTGRKRTTSYKGIRQRRKGKWAAEIRDPRKGIMVWIGTFNTAEEAAKAYDAEAKKIRGEKAKLNFPDHSCSVKVDTSNKMSGKKVKSCAEDPVFLFGRNINSKAKPFPETMDL*	TCAAAGATCCATGGTTTCAGGAAAGGGTTTTGCCTTACTGTTTATATTCCGACCAAATAAGAAAACAGGGTCTTCTGCACACGACTTTACTTTCTTCCCTGACATTTTATTGCTAGTGTCCACTTTTACAGAACACGAGTGATCGGGAAAGTTGAGTTTCGCTTTCTCACCTCGGATCTTTTTAGCCTCTGCATCATACGCCTTGGCGGCCTCCTCTGCCGTATTAAACGTTCCAATCCAAACCATAATGCCCTTTCTTGGATCTCGAATCTCCGCAGCCCATTTTCCCTTCCGACGCTGCCTGATACCTTTGTACGAAGTTGTCCTCTTCCTCCCGGTGCTTTTGGCAGAGGACTTTTCGATATACTTCAGAGGAGGAATCTTGAAATCCTTCAAAGG…
PITA_12584	APFE031550725.1	scaffold180872:29502-47244(-)	MCGGAIIADFIPANRSRRVSPRDLWPDFDTFADLFINGGAVSESVNKSDSFDEGYKQKNKPSNNIFNSKHEFSSGGENEAISPLKDFEIPPLKDFEKCPAKSAGRKKSNLYRGIRQRPWGKWAAEIRDPRKGIRVWLGTFNTAEEAAKAYDAEAKKIRGKKAKLNFADGSCSVKVDSRNKMSRKKVKSCAKNPDLLLALNIKSKVKSSYSPKPDL	TAAATCAGGCTTTGGTGAATATGAAGATTTTACCTTACTCTTTATATTCAAAGCCAATAATAAATCAGGGTTTTTGGCACAGGACTTTACTTTCTTCCTTGACATTTTGTTGCGACTGTCCACTTTTACAGAGCAGGAGCCATCAGCAAAGTTAAGCTTGGCTTTCTTGCCTCTGATCTTTTTAGCCTCTGCATCATACGCCTTGGCGGCCTCTTCCGCAGTGTTAAATGTTCCAAGCCAAACCCTAATGCCCTTTCTGGGATCTCGAATCTCCGCAGCCCATTTTCCCCATGGACGCTGCCTGATACCTCTGTACAAATTCGACTTTTTCCTCCCCGCGCTCTTGGCCGGGCATTTTTCGAAATCCTTCAAAGGAGGAATCTCAAAATCCTTCAATGG…
PITA_12882	APFE030035987.1	scaffold32254:146355-183662(+)	MVCMVVPRSLLLQPLKKSEMDCPSVVLSLGYCPIETEMSSINCSKKNTSLSSPASDEVEEPTMKDAMEGDSTTEHNQDNEVGSAVTEEFSPYMKGFSENGRQLELEEGQFKDWVLARSKGKNVRGLESLGGGINVVPESARESHGLEVMRRYSLMLLQETGKLQSSQYKGVVPQPNGRWGAQIYEKHERVWLGTFNKEEDAAIAYDRAALKFRGRDAMTNFSLARGGNPEARFMREHTKEQIVDMLRKHSYDEEFEHNSKRIKMTPARPASTNNEESGSEGPGQREAETRWPDDRNGNSGMAGLLREHLFDKAVTPSDVGKLNRLVIPKLHAQKYFPLVIDSSEKGSLLDFEEDTGKIWRFRYSYWKSSQSYVLTKGWSRFVKDKKLKVGDFVSFHRGS…	ATGGTTTGCATGGTCGTGCCAAGAAGTCTGTTGCTCCAGCCACTGAAGAAGTCGGAGATGGACTGTCCCAGTGTGGTTCTAAGCTTGGGGTACTGTCCGATTGAGACTGAAATGAGTTCTATCAATTGCAGTAAGAAGAATACTTCTCTATCTAGCCCTGCCTCTGATGAAGTTGAAGAGCCCACTATGAAAGACGCAATGGAAGGTGACTCTACCACTGAACACAATCAAGACAATGAAGTGGGCAGCGCTGTTACTGAAGAATTCAGCCCTTATATGAAGGGTTTCTCAGAGAACGGAAGACAGCTAGAGTTGGAGGAAGGTCAGTTCAAGGATTGGGTTTTAGCAAGATCGAAGGGAAAGAATGTTCGAGGGCTGGAGAGTCTGGGCGGTGGAATA…
PITA_12934	APFE031609429.1	scaffold170481:24660-25796(-)	MARKSHEGDRASSSAVQCNKKQLTGVVPQRNGNWGVQIYANHKRIWLGTFKSEKEAALAYDRASIKLKGKDSPRNLPNEQVFATESYFQNHFTDKEVVEMIKHHSYDEKLLQMKRLPYLPRSTEQGEPLQQLLENLPGSSMMHKPHQFCKALTDSDVGSLNRLVIPKEHARSHLPIKMLDNGETIFLTFFDSGGEEWKFRLKYWTSSRSYVLTSGWRNFVKAKKLEAGDTVCFTPDSTTENTFYITIPRSHEDGKSNSSCIINGFPEKFLAMSTSTESHNSVPQEGRDLGAVTNMLTMPMDFSDSKPTELVRAQDCEGLQGNSIMNSADIHDLVGYELKTEKTETDNGSIKLFGVTIFPNSMPQGRDPGAVTVHASGF*	CTAAAATCCACTGGCATGGACAGTCACTGCACCAGGATCCCTCCCTTGAGGCATTGAATTGGGGAAAATTGTAACCCCAAATAGCTTTATGCTACCATTGTCAGTCTCTGTTTTCTCAGTCTTTAACTCATAACCTACCAAGTCATGGATATCTGCACTATTCATAATGCTATTTCCTTGTAACCCCTCGCAATCTTGAGCCCTCACCAACTCTGTTGGTTTAGAGTCACTGAAATCCATTGGCATGGTCAACATATTAGTTACTGCACCTAGGTCCCTCCCTTCTTGAGGCACTGAATTGTGACTCTCAGTACTAGTAGACATGGCCAGAAACTTCTCAGGAAAACCGTTGATAATGCAAGATGAATTGGATTTTCCATCCTCGTGAGAACGAGGAAT…
PITA_13056	APFE031298980.1	scaffold196496:94596-95744(+)	MTTQSARVRVTRPARRMAVNQRRGKPGRDGVEILEECRLRNGEMEEFDTFGNLRLYIYEGNGRCNKILGVRSAMPGKWKSEIRCGGRQRISLGTFGRAEQAARAYDAACLALRGNSAVRNFPRLRKLLPQSRSQDPKDIKEAAKQATSETVSASLSLAETLAASGDIEEQEQQSTTSASFSLAETAAGAYDSACLALKGDDAVLNFQYLINLFPPSCSRNTNDIKETARQVVHLFCRKKNDAYSF*	ATGACAACCCAAAGCGCAAGGGTTCGAGTTACACGCCCTGCTCGCAGGATGGCGGTGAATCAGAGGAGAGGAAAACCTGGGCGCGACGGAGTTGAAATACTGGAGGAGTGCAGGTTGCGAAATGGCGAAATGGAAGAGTTCGATACCTTCGGAAACCTCCGCCTATACATTTACGAAGGAAATGGACGGTGTAACAAAATATTGGGTGTGCGTTCTGCAATGCCTGGAAAATGGAAGTCTGAAATTCGATGTGGTGGCCGTCAACGGATCAGCCTGGGTACTTTTGGTCGAGCAGAACAGGCAGCCAGAGCGTACGACGCTGCTTGCCTGGCTCTGAGAGGGAACTCTGCAGTGCGAAATTTTCCGCGTTTAAGAAAGTTATTGCCACAATCGCGTTCT…
PITA_13317	APFE030889417.1	scaffold101420:34954-36875(-)	MSGSGVAVPVQAALCNLLKMAGNDSWDLGLRLGKCDSHQSSINSNEPESTWTSVCIKKAMGGDSTRSDNEEADLGLRLGKCDSHESSINSSEPESTWTSVCIKKAMGGDSTRSDNEEAGSVIEDDSNSLPAPVGNSVCSNSSSFLGQTELERMGSGISAVTSVKTNMPSVKGEKNYSKKLPSPQYKGVVLQPNRRWGAQIYEKHKRVWLGTFNRQEDAARAYDRAAIKFRGPDAITNFNFAHSHTEAVFLRGHSKYEIVDMLRKHTYDEELDQNKSTSHINPEVARSNPLEPREHLFEKTVTPSDVGKLNRLVIPKQHAEKYLPLDVGFGGSKGNGVLLSFEDGTDKIWRFRYSYWNSSQSYVLTKGWSRYVKEKRLQAGDIVTFERSSSSGHLFITFR…	TTACTCCGGTAATGTTGCCGCTGCCGGCTTCCGCTTCTTTGTATTTCCACGGCCGTCTTCCTCGATTCTACTGCCCGGGAAAAGATTTGACTGCGACTGCTTTAGGTTTACTCCAAATAGCCAGACGGAAGAAGAAGAAAGAGAATCACCGTCTGTGGACGGAAAAGACCTGTCGAGATTCGCGAAGACCAGCGACGATGGATTCCCGTCATCTGACGGAGTCGGCTCGAGCGCCTTGGAATCATTCAAGGTGAGAGAATAGTGGCTGGCGAGGGCCGGAATCGAACGTTGAGCAACGGCGTTCATGAGCGGTGGCGCTGCGTAGAAAAGCTGTACCCATTCCGGATGGCCGGCCAAGGCGAAGTGGTCAACGGACAGCGGACAGCGTTTGGGGACCGG…
PITA_13485	APFE030169240.1	scaffold177528:8694-10273(+)	MCGGAIISDFVAANRSRRLSTRDLLPDFDKVAELFINGGAVSESSGKSGSLGQGYVVFDEGYKQKNNPSKNIFNYKKEFSSGGESKAILPVKDFEKPAAKNAGRKRMNLYRGIRQRPWGKWAAEIRDPRKGVRVWLGTFNTAEEAARAYDAEAKKIRGKKAKLNFTDDSCSVEMDSSKKMSRKEVKYCTKTPDLLQGFSMISNFKPSYSPKRDLLEGYCINGQMEPSLKDVCRSALQNYGYDDMEYGDSLFLKPRAPFQSNSNVSTVQSSEQSNLSQTLQKSYSCELCSHNYSEVSNFMSNACSDVANFDPVKSSHPVGHFHSDQSSISLDGAHFPWGHETKTPEITSEYDDTYESPFVAIKPPVNGVVKDRSVHTMDVSGGTQTFCVNSSMEVNDGTQ…	ATGTGTGGAGGTGCCATTATTTCGGATTTTGTTGCCGCCAATCGATCTCGGCGGTTAAGTACCAGGGATTTATTGCCGGATTTTGATAAGGTCGCTGAATTGTTCATTAATGGCGGGGCAGTGTCGGAATCCTCCGGTAAATCCGGCAGCTTGGGCCAGGGTTACGTCGTCTTCGACGAGGGATACAAGCAGAAGAATAACCCCAGCAAGAATATTTTCAACTACAAGAAGGAATTTTCTTCAGGTGGTGAAAGCAAGGCGATTCTTCCTGTGAAGGATTTCGAAAAGCCCGCGGCCAAGAACGCGGGAAGGAAGAGGATGAATTTGTACAGAGGCATCAGACAGCGTCCATGGGGAAAATGGGCTGCGGAGATTCGAGATCCCAGAAAGGGGGTTAGG…
PITA_13531	APFE030539334.1	scaffold144812:118834-119510(-)	MEITAGQSLTMNMNMNMLELIRHHLLEVEDEMDIMHLYHPGGNDPSSSSSSVSSSRVSWEYLHGTAAATASGSCQNRSPSEDNESSQYSSASTSVSTVTRRTEAVNINVQPQPREEQSVEKNNEIHYRGVRKRTWGKFAAEIRDPAKQGARFWLGTFVTAEEAALAYDRAAFRIRGAKAVLNFPLAFASISENGSAVGHMGNKRKRGRGETNEEWAACDRGSSVS*	CAACTAACTGAGCTCCCCCGATCACATGCCGCCCACTCCTCGTTCGTTTCTCCTCTCCCTCTCTTCCTTTTGTTCCCCATGTGACCTACGGCCGATCCATTCTCTGAAATGGAAGCGAAAGCAAGGGGGAAGTTAAGGACGGCCTTGGCTCCGCGGATTCTGAAGGCGGCCCGGTCATATGCGAGTGCGGCCTCCTCGGCGGTGACGAAAGTGCCGAGCCAAAACCTGGCCCCCTGCTTGGCGGGGTCCCTGATTTCAGCTGCGAATTTACCCCATGTCCTCTTCCTCACTCCTCTGTAGTGAATTTCATTGTTCTTTTCCACACTCTGCTCCTCCCGTGGCTGTGGCTGCACATTTATATTTACCGCCTCTGTTCTTCTTGTGACTGTGGATACAGAA…
PITA_13626	APFE031586076.1	scaffold54762:121648-125823(-)	MKPVVTNGEKDLSEENSLFCSVNHSKDTLAMISALTRVVCGHILHPMESSTPQLVAGKKRCRDEEQMTNSVKPDDISGQYLTFSPEESSSVTHLEHQQSIREDDLRSKLKDEIQQPQNPTKNKRYRGVRQRPWGKWAAEIRDPKKAARVWLGTFDTAEGAARAYDDAALKFRGVRAKLNFPERVNIRDEDNPGVNIVNEENAAISDFSVQVAPATYWPSAPTYVNLSAPARPAHCDAVHHGHPSQHFITADSTCLSQVSDVYHYAQLLQDQIFDVQQANSHPTLLQQYLASMKYQQESEVYNQQLPSITSIQNQPGLDYISQLQITGRPNLASSNYAGAGLPMCSNYMQQQQQQQPSITITGYEELYDMDEKFIDQTCGNLLPTSQSQSKSYDNLDYNS…	TCAAAGATTGGGGTAGTGCCAATTATGTGCAGGAAGAACTACTGAATTGTAGTCCAGATTATCGTAGGATTTGGATTGCGACTGAGAAGTGGGCAGCAGGTTTCCACATGTCTGATCAATGAACTTCTCGTCCATGTCATACAACTCTTCATATCCTGTGATGGTAATTGATGGTTGCTGTTGTTGCTGCTGCTGCATATAATTACTGCACATTGGTAATCCCGCACCTGCATAGTTCGATGAAGCTAAATTGGGCCTCCCTGTAATTTGCAGTTGTGAAATATAATCTAATCCCGGCTGGTTTTGGATTGATGTGATAGAAGGCAGCTGTTGGTTATAAACTTCTGATTCCTGCTGATATTTCATAGATGCTAAATACTGCTGGAGTAAGGTAGGGTG…
PITA_13952	APFE030646322.1	scaffold1014:88939-89980(+)	MRSWVKWVSEIREPRKKTRIWLGTFRTPEMAARAHDVAALSVKGNSTFLNFPHLTSSLPRPVTLSPRDIQRVAAASAANFHMPSAEYHNEDQSRDSVGTNSCGDNVMPAELSIPKEAAVACMCDSAWISSFLSENESVIIDEDIMFDLPNFLGRMAEALLVAPPWMLEPEVLYEYAYTLKVDEKSDVYSFGVVLLELIIGKKPVGESEFGEHVDICSG*	ATGCGGTCTTGGGTTAAATGGGTGTCGGAGATTCGAGAGCCTAGGAAGAAAACCAGAATTTGGTTGGGGACGTTCCGGACGCCAGAGATGGCAGCTCGAGCCCACGACGTGGCGGCTCTTAGCGTCAAGGGGAACTCGACTTTTCTCAATTTTCCACACCTCACCTCTTCGTTGCCTCGCCCCGTCACATTGTCACCCAGGGACATCCAGAGGGTCGCGGCGGCCTCTGCGGCTAACTTTCACATGCCTTCAGCAGAATACCATAACGAGGATCAATCTCGTGACTCTGTGGGGACAAACAGTTGTGGAGACAATGTAATGCCCGCAGAGCTGAGTATCCCGAAAGAAGCCGCAGTAGCTTGCATGTGTGATTCAGCTTGGATTTCGAGTTTTCTTTCA…
PITA_14145	APFE031235769.1	C3852777:4382-4984(-)	MCGPEANLISLNGSLRVTPRDFNTLFINGGAVSESFKPSNNIFHFNHEFSSGGENEAIPLKDFEQPVFLFGRNINSKVKPLYSPKHDLSEGYSPLLSAENDENSSAKSSGRKRKTLYRGLTQRPSGKWAAKIRDPRKGITVWLGTFNTAEEAAKAYDAEAKKIRGKKAKLNFPDD*	TTAGTCGTCAGGAAAGTTCAGCTTTGCTTTCTTTCCTCTGATCTTTTTAGCCTCTGCATCATACGCCTTGGCGGCTTCCTCTGCCGTATTAAACGTTCCAAGCCAAACCGTGATGCCCTTTCTTGGATCTCGAATCTTTGCAGCCCATTTTCCCGATGGACGCTGCGTGAGACCTCTGTACAAAGTTTTCCTCTTCCTCCCGCTGCTTTTGGCCGAGGAATTTTCGTCATTTTCAGCACTTAGCAGAGGAGAGTAACCCTCAGATAAGTCATGCTTTGGTGAATATAAAGGTTTTACTTTGCTGTTTATATTCCGACCAAATAAAAAAACAGGCTGTTCGAAATCCTTGAGAGGAATCGCCTCATTTTCACCACCTGAAGAAAATTCATGGTTGAAGTG…
PITA_14277	APFE030160044.1	scaffold1792:89015-95523(-)	MVELVTKCMVFSVCLGENLASVQRKIRANPRRSGASRTHHSYVAKTADKLEPAKYGGGGGGMKRSSTGAGGGGGVGGGGGGKGSPYRGVRMRKWGKWVSEVREPNKRSRIWLGSYSTPEAAARAYDTAVFYLRGPSATLNFPEEARKEQQSDLRLSQLGELSPSSIQRRAAEVGAAVDHAMQAGPVPAQTLREINQENDMKNALSSKLSEGNNFKIEAKNNMRQQGLSSKSSDNIFKFDEKNNTMLQGLSSKPSDNIFKFEEKNNTRLQGLNLKPSECDIFPFEEKSNKKLPGFISRSIKKSDVCKVEGMTEEADEEKSDQMRLNLRERDWFKIKDPVSGIGTALNLGQFAIHNVQGIADHGGEHTTLGLSVYRPEKRV*	TCAGACTCGCTTCTCGGGTCTGTACACAGACAACCCTAACGTCGTATGCTCTCCGCCATGGTCTGCAATACCTTGGACGTTATGTATTGCGAACTGCCCTAAATTTAAAGCCGTTCCGATGCCAGAAACAGGATCTTTAATCTTAAACCAGTCGCGCTCCCTCAAATTCAGTCGCATCTGGTCAGATTTCTCCTCATCGGCCTCCTCTGTCATACCTTCAACCTTGCAAACGTCGCTCTTTTTAATCGACCTCGAAATGAAACCCGGCAGCTTCTTATTACTCTTTTCTTCGAACGGGAAAATATCGCACTCGCTTGGTTTCAAATTCAACCCCTGCAGCCTTGTATTATTTTTTTCCTCAAACTTGAAAATATTGTCGCTCGGTTTCGAACTCAAGCC…
PITA_14421	APFE031200408.1	C4241917:5645-6232(+)	MCGPEANLISLNGSLRVTPRDFNTSSESFKPSNNIFHFNHEFSSGGENEAIPLKDFEQPVFLFGRNINSKVKPLYSPKHDSPLLSAENDENSSAKSSGRKRKTLYRGITQRRWGKWAAQIRDPRKGITVWLGTFNMAEEAAKAYDAEAKKIRGKKAKLNFPDD*	ATGTGTGGACCTGAAGCGAATCTCATTTCCCTCAACGGGTCTCTGCGTGTAACTCCCAGGGATTTCAATACGTCGTCGGAATCTTTCAAGCCCAGCAACAATATTTTCCACTTCAACCATGAATTTTCTTCAGGTGGTGAAAATGAGGCTATTCCTCTCAAGGATTTCGAACAGCCTGTTTTTTTATTTGGTCGGAATATAAACAGCAAAGTGAAACCTTTATATTCACCAAAGCATGACTCTCCTCTGCTAAGTGCTGAAAATGACGAAAATTCCTCGGCCAAAAGCAGCGGGAGGAAGAGGAAAACTTTGTACAGAGGTATCACGCAGCGTCGATGGGGAAAATGGGCTGCACAGATTCGAGATCCAAGAAAGGGCATTACGGTTTGGCTTGGAACG…
PITA_15081	APFE030358836.1	C4426835:10850-12676(-)	MTSESVNNMNLVNCGKRAPDQSITTPEKSSATPPAHSKFRGVTKNRWTDRYQARLWDGTWKKQGAKRNGKPGAYDSAERAAKAYDVAAIKFWGLTAKTNFPGRDYEKEMKEMEHMTNEELVGKLRRLQWCFRDTEQAWDSVEARPSIAGLPVSDTKENESMIISVLVFTDTEEEAAVAYDTAALKHWGPHKLVATNFDVKNYDLDQIRRPELCHSKREINTCTATASEPKSACPYKFNAHIHEYNLRHHAAG*	TTATCCAGCAGCATGGTGGCGGAGATTGTACTCATGAATGTGTGCATTGAATTTATATGGACAGGCGCTTTTGGGCTCGCTGGCAGTGGCAGTACAAGTATTGATCTCCCGCTTTGAATGACATAACTCCGGACGTCGAATTTGATCGAGATCGTAATTCTTGACGTCGAAATTAGTGGCAACCAGCTTGTGCGGCCCCCAGTGCTTAAGGGCCGCAGTATCATAAGCCACAGCAGCCTCCTCTTCTGTATCTGTGAAAACCAAAACAGATATTATCATACTTTCATTTTCTTTTGTATCTGACACTGGTAACCCCGCGATACTTGGACGTGCCTCCACAGAATCCCAGGCTTGTTCTGTGTCACGAAAACACCACTGCAATCTCCTGAGCTTCCCCAC…
PITA_15109	APFE031325438.1	super703:256056-257300(+)	MANTRPCSGSNVSTPIAITSFNIRTEALDQSKSGIASRQFSSQYKGVVPQHNGKWGAQIYVTHQRLWLGTFNSEVEAALAYDRACLKFRNAEGPRNILNGLQCQIENNFQELYTKEQVVQMIKDHSYPEKFNYFISVKSRDSAEGGESNEHIRNVRRYGQFMVNPEHLFDKEVTPSDVGKLNRLVVPKQHAERNFPPESQINDRDETLVFVDENSKEWEFRYSFWKSSQSYVLTRGWSRFVKEKQLQAGDIVSFQRCRDNGKLYISVTHRPTYARPPADTFGYQHIAYASPFAHLVVNPHDQNPLHFYNNNSVLHSSAFPVEMRYYSQYVDNRETQLGNESNKEGRLSNFDMSREAREHSLFPTHEAQDDNEVWHHATIAGQSLSSSSQMPGKETTHCS…	ATGGCGAACACTAGGCCATGTTCAGGATCCAATGTCTCAACTCCAATAGCAATAACTTCTTTCAATATTAGAACAGAAGCATTGGATCAGTCGAAGAGTGGAATTGCTTCAAGGCAGTTTTCCTCGCAGTACAAAGGAGTTGTTCCTCAGCATAATGGTAAATGGGGAGCTCAGATATATGTAACCCATCAGAGACTATGGCTAGGTACTTTTAACAGTGAAGTTGAAGCTGCATTAGCATATGATAGGGCCTGTCTGAAGTTCAGAAATGCTGAAGGTCCTCGAAATATTCTCAATGGATTACAGTGTCAGATAGAAAACAACTTTCAAGAGTTGTACACCAAGGAACAAGTGGTCCAGATGATCAAAGATCATTCATATCCAGAGAAATTTAACTAT…
PITA_15245	APFE031101252.1	scaffold216455:5353-5964(-)	MGKPSVEHNSPYPPDKCLGQNCHQFKGVRMRKWGSWGAEIRTPKTRAKIWLGSYKKAEQAARAYDAAVYCLRGPDAKFNFPDSVPSIPSASSLSPRQIQVAAAKYARDELPSTCLSPDTNKNNNGVSLVSPSQSSLVSETALCSNSEQISEERNFWMSLFDSSGCPNFQNFPSIDDITAFDFIPTLQEEEKQDGYISLDLWNF*	TCAAAAGTTCCACAAGTCGAGAGAAATGTAGCCATCCTGCTTCTCCTCCTCCTGCAAAGTCGGAATGAAGTCAAACGCAGTGATGTCGTCAATGGACGGGAAATTCTGGAAGTTAGGGCACCCACTACTGTCGAACAAAGACATCCAGAAATTCCGCTCCTCCGAAATCTGCTCGCTGTTGCTGCACAACGCCGTTTCTGAAACCAAAGATGATTGCGACGGCGAGACGAGGGAGACGCCATTATTGTTCTTATTAGTGTCTGGAGAAAGGCAAGTGGATGGGAGTTCGTCCCGGGCATACTTAGCGGCCGCGACCTGAATCTGGCGGGGGGAAAGAGAAGACGCTGACGGAATGGAGGGTACAGAATCGGGGAAGTTGAATTTGGCGTCGGGGCCTCT…
PITA_15348	APFE031671029.1	scaffold218677:19647-21041(+)	MCGGAIIADFIAANQSRSITARDFWPDFDTFYDLFFNGGAVSESIKKSGSFDDAYNRKNKTSKNIFNSKHKFSSGAENEAITPLKDFEKSSAKRTKRKRRNMYRGIRQRPWGKWAAEIRDPRKGIRVWLGTFNTAEEAAKAYDAEAKKIRGKKAKLNFADGSCSVKMDSSKKMSGKKVKSCTKTPNLLLGLNMNSEVKPGLLEDYFANSQMEPSLEDVFRSDLPVYGSDDMEYRYSEYLKPSAPFRSNSNESTVQSSEHSNLGQTLQQSCCCENCSHNYSEVTNFMSTAHLMGHNSHGLIRRKPQNYHVYTDDGDESVFVDINPPLHGVVKDRPVDTSIEVNSFAVETFMEVNDGTECFAVDIPVEVSGGTECCKTEDSIVQLEFCKELSALESHLGLS…	ATGTGTGGAGGTGCCATAATTGCGGATTTCATTGCCGCGAACCAATCCCGGAGTATTACTGCCAGGGATTTTTGGCCGGATTTCGATACCTTCTATGACTTGTTCTTCAATGGCGGAGCCGTGTCTGAATCCATCAAAAAATCGGGCAGCTTCGACGACGCATACAACCGGAAGAATAAGACGAGCAAGAATATTTTCAACTCCAAGCATAAATTTTCTTCAGGTGCTGAAAATGAGGCAATTACTCCTTTGAAGGATTTCGAAAAGTCCTCGGCCAAGAGAACCAAGAGGAAGAGGAGGAATATGTACAGAGGTATCAGGCAGCGTCCATGGGGAAAATGGGCTGCCGAGATTCGAGATCCCAGAAAGGGCATTAGGGTTTGGCTTGGAACGTTCAAC…
PITA_15381	APFE030110987.1	scaffold41534:151661-152537(-)	MGSPYEGKSRKLEKDPEIWLGNENEKSTALQYLGGYGSTQFAGDCNLQRSVTEFRNPKAEFSESYMRLGAVDKPSDSSLIPSEAMSEGWEPMNQASEEKQEAAAETLAGAEEEKGKSLAVEKRYTGVRKRPWGKYAAEIRDSNRRGARVWLGTFDTAEEAAMAYDQAAFAMRGSRAMLNFPLEVVRESVLRNSKNLTQAKAMGSLLKNQNQMKPLRN*	ctaatttctcagcggtttcatttgattttgatttttcagcaggctgcccatcgccttcgcctgtgtcaaattcttgcTGTTTCGCAGCACGGATTCTCGCACGACTTCCAGAGGAAAATTGAGCATAGCTCGCGAGCCTCTCATGGCGAAGGCCGCCTGATCATAAGCCATGGCCGCCTCCTCTGCAGTGTCAAAAGTCCCAAGCCATACACGAGCGCCACGCCTATTTGAATCTCTGATCTCTGCAGCATATTTCCCCCATGGCCTTTTCCTCACCCCTGTGTAACGCTTCTCCACTGCTAAGGACTTCCCTTTCTCCTCCTCTGCACCTGCTAATGTCTCTGCTGCGGCCTCCTGCTTTTCCTCGCTTGCCTGATTCATGGGCTCCCAACCTTCGCT…
PITA_15448	APFE030205985.1	scaffold135941:92103-93369(+)	MTKPSRNQTRHSSSESSLLKLRQFKGIRKRKWGKWVSEIRMPNSSGRIWLGSYDTAEKAARAYDFAVYCLRGSKAKLNFPHSPPKITCASSLSPAQIQAAAAMFASDEFCLPSENGRAYSPSGLEAKCNIEGQQIMAEQGQTCRDSVPLEPLESGDPDGPLNVDDIPLMDVSTEDLGAINRPGIPFLVHKLLTATHG*	ATGACTAAACCCTCGCGAAATCAGACCCGCCACAGCAGTTCCGAAAGCAGCTTACTGAAGTTGCGGCAGTTCAAGGGAATCCGAAAGAGAAAATGGGGGAAATGGGTGTCGGAAATTCGAATGCCCAATTCCAGTGGAAGAATTTGGCTGGGCTCCTACGACACCGCGGAAAAAGCTGCCCGCGCATACGATTTTGCCGTGTACTGCCTTAGAGGATCCAAGGCCAAGCTCAATTTTCCCCACTCCCCGCCGAAAATTACCTGCGCTTCGTCTCTATCGCCGGCACAAATTCAAGCCGCGGCGGCCATGTTTGCCTCAGATGAATTCTGTCTACCTTCGGAAAACGGCAGGGCATACTCGCCATCCGGTTTGGAAGCGAAATGCAACATTGAAGGTCAA…
PITA_15461	APFE031394938.1	C5071137:58588-59971(+)	MCEGAITTDFIAANQSRRISARDFWPDFDTFYDLFFNGGAVSESINKSGSFDDAYNRKNKTSKNIFNSKHEFSSGAGNEAIPPLKDFEKSSAKSTKRKRRNMYRGIRQRPWGKWAAEIRDPRKGIRVWLGTFNTAEEAAKAYDTEAKKIRGKKAKLNFADGSCSVKMDSSKKMSRKKVKSCTKTPNLLLGLNMNSEVKPGLLEDYFANSQMEPSLEDVFRSDLPVYGSDDMEYRYSEYLKPSAPFRSNSNESTVQSSEHSNLGQTLQQSCCCENCSHNYSEVSNFMPTAHLMGHNSHGLIRRKLQNYHMYIDDGDESVFVDINPPLHGVVKDRPVDTSIEVNSFALETLMEVNDGTECFAVDIPVEVSGGTECCKTEDSIVQLEFCKELSALESYLGLS…	ATGTGTGAAGGTGCCATAACTACGGATTTCATTGCCGCGAACCAATCCCGGCGTATTTCTGCCAGGGATTTTTGGCCGGATTTCGATACCTTCTATGACTTGTTCTTCAATGGCGGAGCCGTGTCTGAATCCATCAATAAATCGGGCAGCTTCGACGACGCATACAACCGGAAGAATAAGACGAGCAAGAATATTTTCAACTCCAAGCATGAATTTTCTTCAGGTGCTGGAAATGAGGCCATTCCTCCTTTGAAGGATTTCGAAAAGTCCTCGGCCAAGAGCACCAAGAGGAAGAGGAGGAATATGTACAGAGGTATCAGGCAGCGTCCATGGGGAAAATGGGCTGCCGAGATTCGAGATCCCAGAAAGGGCATTAGGGTTTGGCTTGGAACGTTCAAC…
PITA_15796	APFE030463186.1	C4944869:36666-37670(-)	MKGGNREARSSAVGQENGGLRNPPSAPPSRKRKCKGKGGPDNIKFQYRGVRQRSWGKWVAEIRQPGKRTRRWLGTFATAEQAAQAYDNAAILLYGSRAHLNLQPSGWDHSKSSHTSKLRPLLPRFTFKFPPAIHATNPNPNPNFFGAIPSGYLQTPLNPDFWPAGMKAAHTDVTYNHPVIDPKRETTLEQRSVFQLEEIRVPTQQCNGAEVLHRESSPLKTDKVQENFGTENVDLQSDRLGDPDQLSGIHGGIVGDEINQGFYSETTGNITEPRNHIDGESRDDNLAASLQELQYSAAPPSPGFMWHYDIKHDYYYDETNSSTLPETNNQLWEF*	TCAGAACTCCCAAAGTTGGTTGTTTGTCTCAGGCAACGTGCTGCTGTTGGTCTCGTCGTAGTAATAATCGTGTTTTATATCATAGTGCCACATGAAACCAGGTGAAGGAGGCGCAGCACTGTACTGCAACTCCTGCAAGGAAGCAGCAAGATTATCATCTCTCGATTCTCCATCAATATGGTTTCTTGGCTCGGTAATATTTCCAGTGGTTTCGCTGTAGAAACCTTGATTGATCTCATCGCCGACGATACCCCCATGAATCCCAGAGAGCTGATCAGGATCACCCAGTCTATCAGATTGCAGATCCACATTCTCGGTTCCGAAATTTTCTTGGACCTTATCTGTCTTCAATGGAGAGGATTCACGGTGCAGTACTTCCGCGCCATTGCACTGCTGTGT…
PITA_15819	APFE031671029.1	scaffold218677:235-1618(+)	MCGGAIIADFIAANQSRRIAARDFWPDFDTFYDLFFNGGAVSESMNKSGSFDDAYNRKNKTSKNIFNCKHEFSSGAGNEAIPPLKDFQKSSAKSTKRKRRNLYRGIRQRPWGKWAAEIRDPRKGIRVWLGTFNTAEEAAKAYDAEAKKIRGKKAKLNFADGSCSVKMDSSKKMSGKKVKSCTKTPNLLLGLNMNSEVKPGLLEDYFANSQMEPSLEDVFRSDLPVYGSDDMEYRYSEYLKPSAPFRSNSNESTVQSSEHSNLGQTLQQSCCCENCSHNYSEVSNFMPTAHLMGHNSHGLIRRKLQNYHMYIDDGDESVFVDINPPLHGVVKDRPVDTSIEVNSFALETLMEVNDGTECFAVDIPVEVSGGTECCKTEDSIVQLEFCKELSALESYLGLS…	ATGTGTGGAGGTGCCATAATTGCGGATTTCATTGCCGCGAACCAATCCCGGCGTATTGCTGCCAGGGATTTTTGGCCGGATTTCGATACCTTCTATGACTTGTTCTTCAATGGCGGAGCCGTGTCTGAATCCATGAATAAATCGGGCAGCTTCGACGACGCATACAATCGGAAGAATAAGACGAGCAAGAATATTTTCAACTGCAAGCATGAATTTTCTTCAGGTGCTGGAAATGAGGCCATTCCTCCTTTGAAGGATTTCCAAAAGTCCTCGGCCAAGAGCACCAAGAGGAAGAGGAGGAATTTGTACAGAGGTATCAGGCAGCGTCCATGGGGAAAATGGGCTGCCGAGATTCGAGATCCCAGAAAGGGCATTAGGGTTTGGCTTGGAACGTTCAAC…
PITA_16114	APFE030828939.1	C4479435:2679-4483(+)	MTSESVNNMNLVNCGKRAPDQSITTPEKSSATPPAHSKFRGVTKNRWTDRYQARLWDGTWKKQGAKRNGKPGAYDSAERAAKAYDVAAIKFWGLTAKTNFPGRDYEKEMKEMEHMTNEELVGKLRSVRYKKKESMIISVLVFTDTEEEAAVAYDTAALKHWGPHKLVVTNFDVNNYDLDQIRRPELCHSKREINTCTATASEAKSACPYKFNPHIHENNLRHHAVG*	ATGACCTCTGAATCTGTCAACAACATGAATCTTGTAAACTGTGGAAAGAGGGCTCCAGATCAGAGTATCACTACTCCGGAGAAGAGTAGTGCTACCCCTCCTGCACATTCTAAGTTTCGTGGGGTCACCAAAAATAGGTGGACGGATAGATACCAAGCCCGTCTTTGGGACGGTACCTGGAAAAAGCAGGGTGCCAAGCGAAATGGTAAACCAGGTGCATACGATTCGGCAGAACGCGCAGCAAAAGCTTACGATGTTGCAGCGATTAAATTCTGGGGTTTAACTGCCAAAACCAACTTTCCAGGGAGGGACTATGAAAAAGAGATGAAAGAGATGGAGCACATGACTAATGAAGAACTGGTGGGGAAGCTCAGGAGTGTAAGATACAAAAAAAAAGAA…
PITA_16944	APFE030062501.1	scaffold226969:45792-47615(-)	MTSESVNNMNLVNCGKRAPDQSITTPEKSSATPPAHSKFRGVTKNRWMDRYQARLWDGTWKKQGAKRNGKPGAYDSAERAAKAYDVAAIKFWGLTAKTNFPGRDYEKEMKEMEHMTNEELVGKLRRLQWCFRDTEQAWDSVEARPSIAGLADTEEEAAVAYDTAALKHWGPHKLVVTNFDVKNYDLDQIRRPELCHSKREINTCTATASEAKSACPYKFNPHIHENNLRHHAVG*	TTATCCAACAGCATGGTGGCGGAGATTGTTCTCATGAATGTGTGGATTGAATTTATATGGGCAGGCGCTTTTGGCCTCGCTGGCAGTGGCAGTACAAGTATTGATCTCCCGCTTTGAATGACATAACTCCGGACGTCGAATTTGATCGAGATCGTAATTCTTGACGTCGAAATTAGTGACAACCAGCTTGTGCGGCCCCCAGTGCTTAAGGGCCGCAGTATCATAAGCCACAGCAGCCTCCTCTTCTGTATCTGCTAACCCCGCGATACTTGGACGTGCCTCCACAGAATCCCAGGCTTGTTCTGTGTCACGAAAACACCACTGCAATCTCCTGAGCTTCCCCACCAGTTCTTCATTAGTCATGTGCTCCATCTCTTTCATCTCTTTTTCATAGTCCCT…
PITA_17746	APFE030435019.1	C4553057:8425-11646(+)	MEINQSQYGWPEAMGAAEADSMNITMNMLELIRHHLLEVDDDIDIGEGSSPLSFSPTDSGSGVHNSIDDHDYDDTETNGIATMGSCQNINSKSISEGNENEFRQQDCASCYSYSFKVKPQEDENGAMNQIWGRHYRGVRRRPWGKFAAEIRDPSRKGSRIWLGTFDTAEEAALAYDRAAFSIRGAKALVNFPLAVAPNSEKGSPVGHMELRRQGSIGFARAEDLKAVVQSVVALKDFMDHTAMLATPNQRTISYSAHMAVAH*	ATGGAAATTAACCAATCTCAATATGGATGGCCGGAGGCAATGGGCGCTGCAGAAGCAGACAGCATGAATATTACCATGAATATGTTGGAGCTTATCCGCCACCATTTGCTGGAAGTTGATGACGATATTGATATCGGAGAAGGGAGCTCACCGTTGTCGTTCTCCCCTACGGACAGTGGCAGCGGCGTTCATAATAGTATCGATGATCATGATTATGATGATACGGAGACCAATGGCATAGCCACCATGGGATCCTGCCAAAATATCAACAGCAAATCAATATCGGAAGGCAATGAAAATGAATTTAGACAACAAGATTGCGCTTCTTGTTATTCTTATTCTTTCAAGGTGAAGCCACAAGAAGACGAGAATGGCGCGATGAACCAGATCTGGGGTagg…
PITA_18051	APFE030906910.1	scaffold10713:57522-59024(+)	MNVPVMERTGGRSVLPKKVVEYKTVITKKFEEESLAHGGEFEGKRIPRRVKVISTDPDATDSSSDEENGDGSGQPLYSGRVKRHIQEINIELPDGLPSCSEIEREEFRWMKKSSRSNRRRQRIQAKPSSARLPAENEIESSSKYALRNVQKRDKKCNKKDDVFESGKKFKGVRQRPWGKWAAEIRGNDKGERFWLGTFETAEDAARAYDNAARKLRGLAAETNFPDSTTSATRHKRAPRTSEGIETESDNTAMATTELSGAAVGKGQNSPDSAAPVKKRARRDFLSSAEPSIASGYEEESSGEDGMLVSSPTSVLRYCLEKAPAKHEPNHTEGDRNAKAGANPTETDGNAVPLGDPGFSFLDLDNSELNWDSPLDYDLFESLLDDSGPADFLIAHAELQ…	ATGAATGTGCCTGTGATGGAGAGAACTGGTGGTAGAAGTGTTCTGCCCAAGAAAGTGGTGGAGTACAAGACTGTAATTACCAAGAAATTTGAAGAAGAGAGTTTGGCTCATGGTGGAGAGTTTGAGGGGAAAAGGATTCCCAGGAGAGTGAAAGTTATTAGTACTGACCCTGATGCTACTGATTCGTCCTCAGATGAAGAAAATGGTGATGGCAGTGGGCAGCCCCTGTATTCTGGACGGGTGAAGCGGCATATACAAGAAATTAATATTGAATTGCCAGATGGGTTGCCTTCGTGTTCTGAGATTGAAAGAGAAGAGTTTCGGTGGATGAAGAAATCAAGCAGAAGCAACAGGAGGAGGCAGAGGATCCAGGCAAAGCCTTCTTCTGCCAGATTGCCT…
PITA_18168	APFE030866823.1	scaffold147065:40624-42690(+)	MTTQSARVRVTRPARRMEVNQRRGKPGHDGVEILEESRLRNGEMEEFDTFGNLRLYIYEGNGRCNKILGVRSSMPGKWKSEIRCGGRQRISLGTFGRPEQAARAYDAACLALRGNSAVRNFLRLRKLLPQSRSQDPKDIKEATKQAAAEKVSASLSLAETLAASGDIEEQEQQSTTSASFSLAETAAGAYDGACLALKGDDAVLNFQYLINLLPPSRSRNTNDIKETAREAAVVVSIRADTVAVSEHIEQYEQQRSASESTAVSEHIDGYSAFDDEPPTPYFDRKMAEALMIAPPPLYDEDDPNQLATVVSLWSYPSRSLDRSEIMSLSVLLCQWSGHTLKLGSLKAHFQLNTVLYSEHPAVTKGACQLPRMTVDSSSSSMHFGRPLKVVVLQHRNLAL…	ATGACAACCCAAAGCGCAAGGGTTCGAGTTACACGCCCTGCGCGCAGGATGGAGGTGAATCAGAGGAGAGGAAAACCTGGGCACGACGGAGTTGAAATACTGGAGGAGTCCAGGTTGCGAAATGGCGAAATGGAAGAGTTCGATACCTTCGGAAACCTCCGCCTATACATTTACGAAGGAAATGGACGGTGTAACAAAATACTGGGTGTGCGTTCTTCAATGCCTGGAAAATGGAAGTCTGAAATTCGATGTGGTGGCCGTCAACGGATCAGCCTGGGTACTTTTGGTCGACCAGAACAGGCAGCCAGAGCGTACGACGCTGCTTGCCTGGCTCTGAGAGGGAACTCTGCAGTGCGAAATTTTCTGCGTTTAAGAAAGTTATTGCCACAATCGCGTTCT…
PITA_18529	APFE031545793.1	super3638:89420-187679(+)	MAPTDRNRSNPVVDEDVKDAKEANYRGVRKRPWGKYGAEIRDPSIKRRRWLGTFDTAEEAARAYDNVARNIKGVKAKTNFPAPYLPLNNVDIQGCSPTATTSLPPSPPANHANNKNGCSANISEQITPWTHFYMNDGLERQRVNKHSMSTPWSTGRIGISNIIPTNLEVAVKKFLDQDFSGDALEQFRSEVRIMRRLRHPNIVLFMGAVTRPPNLSILTEFLPRGSLYRLIHRPNIQIDEKRRLRMALDVAQGMNYLHSSNPVIVHRDLKSPNLLVDKNWVVKVCDFGLSRLKHHTFLSSKSTAGTKSVGCSSIPLQTAAGHFIAMADADVDCKPDNNWLLCSGRDGGVKAIVSLLVAGSLACYGGCRQCDDSNGFYLRRPGPFPSYSYL*	ATGGCTCCCACCGACAGAAATCGTAGCAACCCGGTAGTGGACGAGGATGTGAAGGACGCCAAAGAGGCGAATTACAGAGGCGTGAGAAAGAGACCCTGGGGTAAATATGGGGCTGAAATCAGAGATCCCTCCATTAAAAGACGCAGGTGGCTGGGTACCTTCGACACTGCAGAGGAAGCAGCTAGAGCATATGACAATGTCGCCAGAAATATAAAAGGTGTCAAAGCGAAGACCAACTTCCCAGCTCCCTACCTCCCTCTAAACAACGTTGACATACAAGGATGCAGCCCCACAGCCACTACCTCTCTGCCTCCCTCTCCGCCTGCTAATCACGCCAATAACAAGAATGGGTGTTCTGCTAATATCTCTGAACAAATAACGCCCTGGACGCACTTTTAT…
PITA_18762	APFE030440549.1	scaffold99333:63788-64480(+)	MSMTAAYQEAQGEAATPNLAAIRVSSTAEGDFNRVQQLESSEKRMEKERKIKSSGETHHPMYRGVRKRRWGKWVSEIREPRKKSRIWLGSFPTPEMAARAHDVAALCLKGHSAILNFPETVHHLPRPSSSSAKDIQAAALAAAEFDNLPITPQSSHQPLDLQEKAAVNETNNKQSEDNTMVDLTAFLTNMAEGLLLPPAPYCMVDNQSFNADEFNEDNGVDELFLWHFEQ*	ATGTCAATGACTGCAGCGTACCAAGAAGCGCAAGGCGAGGCAGCGACTCCAAATTTAGCGGCGATACGAGTTAGCAGCACAGCCGAAGGAGATTTTAACCGTGTGCAGCAATTAGAATCGAGTGAGAAGAGGATGGAGAAAGAGAGAAAAATTAAGAGCAGTGGAGAAACGCACCATCCAATGTACAGAGGGGTGAGAAAAAGGAGATGGGGAAAGTGGGTCTCGGAAATAAGGGAGCCCAGGAAGAAATCTCGTATCTGGCTCGGCTCCTTCCCCACACCAGAAATGGCAGCTCGTGCACACGACGTGGCCGCTCTGTGTTTAAAAGGCCACTCCGCTATTCTCAATTTCCCGGAAACTGTCCATCATCTTCCCCGTCCTTCTTCTTCTTCAGCGAAA…
PITA_18842	APFE031170580.1	scaffold203381:46235-47008(+)	RFLRYAVSTSRDVQGRRDIQSPIAAMAVDTIQMARVGVKMKIGGGGCEEEASSAVKETHFRGVRKRPWGRFAAEIRDPLKKTRVWLGTFDTAEEAARAYDNAARNLRGAKAKTNFLLSPHNDISTKGSSSAALSSNSTTSAASGQIQNQWPLRPYFYSNQGPAIVSFSCAPAASLSPTDNNQCGGSSCVTRGSASRNSAEENQTVYNKRGKFLFGIDLMISCDSQQQEDDAEICSSARQKAPFLLDLNLPPAANDVE*	AGGTTCCTCAGGTACGCAGTCTCTACATCGCGTGACGTTCAAGGGAGACGGGATATCCAGAGTCCGATCGCCGCCATGGCCGTAGACACCATACAGATGGCGAGAGTGGGTGTAAAAATGAAGATCGGAGGAGGCGGCTGCGAGGAAGAGGCGTCCTCGGCTGTGAAGGAAACGCATTTCAGAGGAGTGAGGAAAAGGCCGTGGGGGAGATTCGCTGCCGAGATCAGAGATCCCTTGAAGAAAACCAGAGTCTGGCTGGGCACTTTTGACACTGCAGAGGAGGCCGCCCGAGCCTACGATAACGCTGCTAGAAATCTCCGCGGGGCCAAGGCGAAAACTAATTTTCTTCTGTCTCCCCACAATGACATCAGCACCAAGGGCAGCAGCAGCGCCGCCCTG…
PITA_18921	APFE031322426.1	scaffold136035:162882-163487(-)	MAEKQFVPNSPNGMVELESKKRKNRACDEAEGAGSYPIYRGVRRRRWGKWVSEIREPRKKKRIWLGSYDTPQMAARAHDVAALCLRGKAACLNFPDLVGMFPRPSSLDPSDIQSAAAEAARAFNGETFSLQSSSSHGSYRDQQNYYNALSESLRESLGPDHAENSVHKQQATGNSASTPCTELELRLNLWWPPPKIIQEKL*	TCACAGTTTTTCCTGAATAATTTTGGGAGGCGGCCACCACAAATTCAATCGCAGTTCCAATTCAGTACAAGGTGTCGAAGCCGAATTTCCTGTGGCTTGCTGCTTATGCACGCTGTTTTCTGCATGATCTGGCCCAAGGCTTTCTCTTAAACTCTCACTTAACGCGTTGTAATAATTTTGTTGATCCCTGTAACTCCCATGGGAGCTGGAGCTTTGAAGTGAAAAAGTCTCCCCGTTGAAGGCACGGGCAGCCTCGGCAGCTGCTGACTGTATATCACTGGGATCCAACGAAGAGGGGCGAGGAAACATGCCCACTAAATCTGGAAAGTTAAGGCAGGCAGCCTTGCCTCTCAAGCATAAAGCAGCCACGTCATGGGCTCGAGCTGCCATCTGTGGAGT…
PITA_18941	APFE031681176.1	scaffold228765:1280-3054(-)	MTSESVNNMNLVNCGKRAPDQSITTPEKSSATPPAHSKFRGVTKNRWTDRYQARLWDGTWKKQGAKRNGKPGAYDSAERAAKAYDVAAIKFWGLTAKTNFPGRDYEKEMKEMEHMTNEELVGKLRRLQWCFRDTEQAWDSVEARPSIAGLADTEEEAAVAYDTAALKHWGPHKLVATNFDVKNYDLDQIRRPELCHSKREINTCTATASEPKSACPYKFNPHIHENNLRHHAVG*	TTATCCAACAGCATGGTGGCGGAGATTGTTCTCATGAATGTGTGGATTGAATTTATATGGGCAGGCGCTTTTGGGCTCGCTGGCAGTGGCAGTACAAGTATTGATCTCCCGCTTTGAATGACATAACTCCGGACGTCGAATTTGATCGAGATCGTAATTCTTGACGTCGAAATTAGTGGCAACCAGCTTGTGCGGCCCCCAGTGCTTAAGGGCCGCAGTATCATAAGCCACAGCAGCCTCCTCTTCTGTATCTGCTAACCCCGCGATACTTGGACGTGCCTCCACAGAATCCCAGGCTTGTTCTGTGTCACGAAAACACCACTGCAATCTCCTGAGCTTCCCCACCAGTTCTTCATTAGTCATGTGCTCCATCTCTTTCATCTCTTTTTCATAGTCCCT…
PITA_19159	APFE030672423.1	scaffold11583:42952-43779(+)	MENSHSGSGSESERCCDWREPTISVAGIFDWCEPTITVAGSVCTRMSNNLNMLKLIRRHLLEVEDEFDDLEVDHAGANPSSSPSFSFFPTNLLSVSEDYNQDTAAITTTTWVSCQNNSSGSTSEINENEFTQVQDCFSSSSPSVCTVVRGAEEFEVVKPQSHGEENGEMKQIKRTRPYRGVTQRPWGKFAAEIRDPAKKGARVWLGTFSTAEEAALAYDRAAFKIRGARALVNFPLKFASDAENGSAAGQITQKRKRAKLQTEETCSGRSHEIKK*	ATGGAAAATAGTCATTCTGGATCTGGATCTGAATCTGAACGCTGTTGTGACTGGCGCGAGCCCACGATCAGTGTTGCAGGAATTTTTGACTGGTGCGAGCCCACGATTACTGTTGCAGGAAGTGTATGCACAAGAATGAGCAACAACCTGAATATGTTGAAGTTGATTCGCCGTCATTTGCTGGAAGTGGAGGATGAATTTGATGACCTAGAGGTCGATCACGCAGGAGCAAACCCATCCTCATCGCCATCGTTTTCCTTCTTCCCCACAAACCTGCTCAGTGTTAGCGAGGATTATAACCAGGACACTGCTGCCATTACCACCACCACCTGGGTCTCATGCCAAAATAACAGCAGCGGATCAACTTCAGAAATCAATGAGAATGAATTTACACAAGTG…
PITA_19406	APFE030732680.1	super3102:345521-346669(+)	MTTQSARVRVTRPARRMEVNQRRGKPGRDGVEILEECRLRNGEMEEFDTFGNLRLYIYEGNGRCNKILGVRSAMPGKWKSEIRCGGRQRISLGTFGRAEQAARAYDAACLALRGNSAVRNFPRLRKLLPQSRSQDPKDIKEAAKQATSETVSASLSLAETLAASGDIEEQEQQSTTSASFSLAETAAGAYDSACLALKGDDAVLNFQYLINLFPPSCSRNTNDIKETARQVVHLFCRKKNDAYSF*	ATGACAACCCAAAGCGCAAGGGTTCGAGTTACACGCCCTGCTCGCAGGATGGAGGTGAATCAGAGGAGAGGAAAACCTGGGCGCGACGGAGTTGAAATACTGGAGGAGTGCAGGTTGCGAAATGGCGAAATGGAAGAGTTCGATACCTTCGGAAACCTCCGCCTATACATTTACGAAGGAAATGGACGGTGTAACAAAATATTGGGTGTGCGTTCTGCAATGCCTGGAAAATGGAAGTCTGAAATTCGATGTGGTGGCCGTCAACGGATCAGCCTGGGTACTTTTGGTCGAGCAGAACAGGCAGCCAGAGCGTACGACGCTGCTTGCCTGGCTCTGAGAGGGAACTCTGCAGTGCGAAATTTTCCGCGTTTAAGAAAGTTATTGCCACAATCGCGTTCT…
PITA_19617	APFE030822934.1	scaffold26078:34012-35591(+)	MCGGAIISDFVAASRSRRIRTRDLWPDFDQFAELFINGGAVSESSGKSGSLGEGFVVFDEGYKQKNKPSNNIFNSKKEFSSGGESKAIPPVKDFEKPAAKNAGRKRMNLYRGIRQRPWGKWAAEIRDPRKGIRVWLGTFNTAEEAARAYDAEAKKIKGKKAKLNFTDGSCSVEMDGSKKMSRKKVKYCTKNPDLLDGFNMNSTVKPSYLPKRDLLEGYCINGQMEPSLKDVCRSALPNYGDDDMEYGDSLFLKPSAPFQSNSNVSTVQSSEQSNLSQTLQKSCSYELCNHNYSEVSNFMSSACSDVANFEPVKSSNPVGHFHSDQSSISFDGVHFPWAHETKTPEITSEYDDTNESPFAAIKPPVNGVVKDRSVHTMNVIGGTQTFCVNSSMEVNDGTQ…	ATGTGTGGAGGTGCCATTATTTCGGATTTCGTTGCCGCCAGTCGATCTCGGCGGATAAGGACCAGGGATTTATGGCCGGATTTTGATCAGTTCGCTGAATTGTTCATTAATGGCGGGGCAGTGTCGGAATCCTCCGGTAAATCCGGCAGCTTGGGCGAGGGTTTCGTTGTCTTCGACGAGGGATACAAGCAGAAGAATAAGCCCAGCAATAATATTTTCAACTCCAAGAAGGAATTTTCTTCAGGTGGTGAAAGCAAGGCGATTCCTCCTGTGAAGGATTTCGAAAAGCCCGCGGCCAAGAACGCGGGAAGGAAGAGGATGAATTTGTACAGAGGCATCAGACAGCGTCCATGGGGAAAATGGGCTGCGGAGATTCGAGATCCCAGAAAGGGTATTAGG…
PITA_19735	APFE030613284.1	scaffold229093:110530-111511(+)	MAPTDRNRSNRVVDQDVKDAKEVNYRGVRKRPWGKYGAEIRDPSIKRRRWLGTFDTAEEAARAYDNAARNIKATTSLPPSPPANHANNKNGCSANISEQITPWTHFYMNDGLERQRVNKHSMSTPWSTGRIGISNIIPTNLVDFAILLQQQQQPQPMAMPLCGKIVATHMINKPNGNEWMGAGATKNKLPTTSSQITTCDLYSLSVVLDSQLSPDDLVIQEKVTPKSFDLNFPAPGEEGATKNKLPTTSSQITTCDLYSSSVVLDSQLSPDDLVIQEKVTPKSFDLNFPPPGEEDDEDEH*	ATGGCTCCCACCGACAGAAATCGTAGCAACCGGGTAGTGGACCAGGATGTGAAGGACGCCAAAGAGGTGAATTACAGAGGCGTGAGAAAGAGACCCTGGGGTAAATATGGGGCTGAAATCAGAGATCCCTCCATTAAAAGACGCAGGTGGCTGGGTACCTTCGACACTGCGGAGGAAGCAGCTAGAGCATATGACAATGCCGCTAGAAATATAAAAGCCACTACCTCTCTGCCTCCCTCTCCGCCTGCTAATCACGCCAATAACAAGAATGGGTGTTCTGCTAATATCTCTGAACAAATAACGCCCTGGACGCACTTTTATATGAATGACGGATTGGAAAGGCAAAGAGTGAACAAACACAGCATGAGTACTCCATGGAGTACTGGACGTATTGGTATT…
PITA_20467	APFE031281924.1	C4926851:19242-20802(-)	MEEMSDLECLFHEVEMPSLECLFHEVEEQEVQPIIDEMSALECLFREVEEQEVQQHLGYSNLSTMAVSESWLHHPTRYPVQEKIQTGGFRTEALISRTEALISTGACNGSVSGHVVDRNPEKLDTTLGFGGGIGAAQGSLISDSGVPTYENQQVPALSPEAMVSDGYKSKGDKQKISIDRATAQSSKHYRGVRMRAWGKWVAEISNPITRAKVWLGTFDTAEDAARAYDEAAYRFRGLKANLNFPNELCHSNGNQSKGAKLKISIDRATAKSSKPYRGVRMRAWGKWVAETINPITKAKVSLGTFDTAEDAARAYDEAAYRFRGLKAQLNFPNDLRRSNGNAHRPRRRTRAKESQRFGSAKHSNPITDPSFPPSLISQHFPGFHFYVRLLQNPRLSSLP…	TTAGACGTTCGTTGGTTGAGACGTTTGTAAGTATCCAGGAACGTTAGAATATAGTGACTGCGAGGAGGGCTCGGTGGGAATAGGATGCTGCAAGGCCGACGCAGACACCCAATGAACGCTTGCTGGTGGCCCAGTAGGAACAACATTAGCAGTGGGGTGTGGCAATATGGGGTCACAGAGCAACATTGCCAGATACTGCTCCCTAAGAGGGAGTGAAGACAGACGTGGATTCTGCAGCAGCCGAACGTAGAAATGAAATCCTGGAAAGTGTTGCGAGATTAGGCTTGGAGGAAACGACGGGTCCGTGATCGGATTTGAATGCTTTGCTGAACCAAAACGTTGTGATTCCTTTGCACGAGTGCGGCGGCGAGGGCGGTGAGCATTTCCATTGCTGCGGCG…
PITA_20685	APFE030206862.1	scaffold82905:41149-42064(+)	MCGGAIIADFIAANQSRRIAARDFWPDFDTFYDLFFNGGAVSESINKSGSFDDAYNRKNKTSKNIFNCKHEFSSGAGNEAIPPLKDFQKSSAKSTKRKRRNLYRGIRQRPWGKWAAEIRDPRKGIRVWLGTFNTAEEAAKAYDAEAKKIRGKKAKLNFADGSCFVKMDGSKKMSGKKVKLCTKTPNLLLGLNMNSEVIPDLLEDYFANSQMEPSLKDVYRWDLPVYGSDDMEYRYSEYVNPSAPFRSNSNESTVQSSEHGNLGANFAAIVLL*	ATGTGTGGAGGTGCCATAATTGCGGATTTCATTGCCGCGAACCAATCCCGGCGTATTGCTGCCAGGGATTTTTGGCCGGATTTCGATACCTTCTATGACTTGTTCTTCAATGGCGGAGCCGTGTCTGAATCCATCAATAAATCGGGCAGCTTCGACGACGCATACAATCGGAAGAATAAGACGAGCAAGAATATTTTCAACTGCAAGCATGAATTTTCTTCAGGTGCTGGAAATGAGGCCATTCCTCCTTTGAAGGATTTCCAAAAGTCCTCGGCCAAGAGCACCAAGAGGAAGAGGAGGAATTTGTACAGAGGTATCAGGCAGCGTCCATGGGGAAAATGGGCTGCCGAGATTCGAGATCCCAGAAAGGGCATTAGGGTTTGGCTTGGAACGTTCAAC…
PITA_20773	APFE030363092.1	scaffold73759:4372-4965(-)	LMDVAGGASNSINMEMWNMLELIRHHLLEVEDDIDNQCTSPFSFSSTANAGSVYINIDDIENEGTSPLIRRAEVFKVKQQPCEQENGKMKQISYRHYIGVRRRPWGKFAAEIRDPVKKGARVWLGTFNTGEEAALAYDRAAYRLRGAKALLNFPLALASNSESGLAVGQRAHRRKRGNSGSGRGMDIELEEPSSNFS*	TCAGCTAAAATTGCTTGACGGTTCCTCCAATTCGATGTCCATCCCGCGCCCACTGCCACTGTTTCCTCTCTTCCTCCTATGCGCCCTCTGACCTACGGCCAACCCGCTCTCTGAATTGGAAGCGAGGGCGAGGGGGAAGTTCAGCAAAGCCTTAGCACCACGAAGTCTGTAGGCAGCGCGGTCATATGCGAGAGCGGCCTCTTCGCCGGTGTTGAAAGTGCCCAGCCAAACTCGAGCGCCCTTCTTGACGGGATCTCTGATTTCCGCTGCGAATTTTCCCCATGGCCGCCGCCTCACTCCTATGTAGTGCCTGTAACTGATTTGTTTCATCTTTCCATTCTCCTGCTCGCATGGCTGTTGCTTTACCTTAAACACCTCTGCTCTTCTTATCAACGGTGA…
PITA_20788	APFE031312149.1	C4594959:10196-18344(-)	MALETAFPHVAEGSYDHEHSVVVSSERLLEDVWAHFIGTGTHHPIYHEQQPVVRSNHGKEESCLNPQIAMLPLKENDSEDMILFQLLNEAANHGWSANHEQKQTEIRGATGSTTYVSAIGETEMIWEQGGVAENSKRYRGVRRRPWGKFAAEIRDSARQGARVWLGTYKTAEEAAMAYDKAALLIRGTRASLNFPVEVVAKAMADTNYWCSSKLISSRQKHIRVPHIQVPDAAGSPAADFKNHIGEDDDGMTKMRRKRMRENNRSSEDIQEVGSALDSPARDQEHLGGPAYGLVNDVLMNSDGNNTCLTLDLAVRMNCDSNDTRLSLESAVVELQDLGNDYLEELLLATEDSRYDNHDILISIQ*	TTATTGGATGGAAATGAGAATATCATGGTTATCATATCTAGAGTCCTCTGTGGCAAGAAGCAATTCTTCCAAGTAATCGTTTCCAAGGTCCTGTAACTCGACAACAGCCGACTCTAAGGATAAGCGCGTATCATTACTATCGCAATTCATTCGCACAGCCAAGTCTAAGGTTAAGCACGTATTATTACCGTCACTATTCATCAACACATCGTTAACCAACCCATAGGCAGGACCGCCTAAATGCTCCTGATCGCGTGCAGGGCTGTCCAATGCTGAGCCCACCTCTTGAATGTCTTCGCTACTTCTATTATTCTCCCTCATTCTTTTCCGCCGCATCTTCGTCATTCCATCATCGTCTTCTCCAATATGATTCTTAAAATCCGCTGCAGGAGAACCGGC…
PITA_20957	APFE031341285.1	scaffold26949:176115-177663(-)	MRGDRDREIKEEKEGGDQQNSYFNPHGAPAQAEMSAMVSALSQVVAGRGGAAPQEWPLPQSTTTGVKEWPLPQSTATGVKREREKENESGEMLGEMGRGQYYSDPRFHASEFMQGSIISRPRLFHQQESIKPPQLGMWQTIQPSAQAAATLRPPPPPAGSSSEETQTELSTGEAVVSVERRRRYRGVRQRPWGKWAAEIRDPHKAARVWLGTFDTAEDAARAYDEAALRFRGSRAKLNFPEEAQLILRPPPAHNNPPPPLHATQNLPPTTTTPPSRFGGGGGAGPMLPLQQRPQIQDNFPVEYYEYARLLQTPEPEPMPEREQLSMQPLLRQYLAAQQQAQFDTAQNSPSGSFWNLNPAVSSQTDERGPTSSEAEQFPWPPTSGYLTRPPAAQPPTLPD…	TCATTGTGGCGGTCGAGGGTATAGCTGCCGCCAAGTTGATGGACCAGAAGACGGTGGTCGTCCGGATTGGCCGAACTGGTGGGGGATGCCTGGGAAATCGGAAACATGGCCGGATTCAGTAAAGTCGGGCAAAGTTGGTGGCTGTGCAGCCGGCGGCCGAGTGAGATAACCCGAAGTCGGCGGCCATGGAAATTGCTCGGCCTCGGAACTCGTAGGGCCCCGTTCGTCGGTCTGAGATGAAACTGCGGGATTAAGATTCCAGAATGATCCAGAAGGAGAGTTTTGCGCAGTATCAAACTGAGCTTGCTGCTGGGCCGCCAAATACTGCCGTAGGAGTGGCTGCATAGAGAGCTGTTCCCGTTCAGGCATCGGTTCAGGCTCCGGAGTCTGCAACAATCG…
PITA_21181	APFE031745016.1	C5170805:141884-144148(+)	MEQVREWVGPPFGLYERSTVLLVLIEAVLAVFIYFRVHSKFKRLRGKRSASTTTLWQSEIDSANEALSLACCVTNVEMSFTVYSEKDASASTPANHDLGRQDWCARDKAQEQTTNEGMKGWGSAEDRQDDDVESAMTEELNPSAMGISENGWQPKQDAVMLKASGSPRSMEKNFRGQQRMGSEMSVVSGSGGESDVFEDPRRYSMSMEQTGKLPSSHYKGVVPQPNGRWGSQIYEKHQRVWLGTFDEEEDAAKAYDRAALKFRGRDAITNFSPARDGDSEARFMREHSMGEIVDMLRKHTYDAEFEHHRKSLMLREALSASENKAGASGLKVSGVCQENQETVYANTNVSSSAAVAAKDMEDPPREHLFDKALTPSDVGKLNRLVIPKQYAEKYFPLDA…	ATGGAGCAGGTTAGGGAATGGGTGGGACCTCCTTTTGGCCTGTATGAACGGAGCACTGTCCTGCTAGTTCTAATAGAGGCGGTTCTGGCGGTGTTCATATATTTCCGTGTGCATTCAAAGTTCAAACGCTTGAGAGGTAAGAGGTCTGCTTCTACAACCACTCTGTGGCAGTCGGAGATTGATTCGGCCAATGAAGCGCTAAGCTTGGCGTGCTGTGTCACGAACGTCGAAATGAGCTTTACCGTTTATAGCGAGAAGGATGCCTCTGCATCCACCCCTGCCAATCATGACCTCGGCCGCCAAGATTGGTGTGCCAGAGATAAAGCTCAAGAGCAGACAACGAACGAAGGAATGAAGGGTTGGGGTTCTGCAGAAGACAGGCAAGATGATGACGTCGAG…
PITA_21258	APFE031681176.1	scaffold170217:37589-39368(+)	MTSESVNNMNLVNCGKRAPDQSITTPEKSSATPPAHSKFRGVTKNRWTDRYQARLWDGTWKKQGAKRNGKPGAYDSAERAAKAYDVAAIKFWGLTAKTNFPGRDYEKEMKEMEHMTNEELVGKLRRLQWCFRDTEQAWDSVEARPSIAGLADTEEEAAVAYDTAALKHWGPHKLVATNFDVKNYDLDQIRRPELCHSKREINTCTATASEPKSACPYKFNPHIHENNLRHHAVG*	ATGACCTCTGAATCTGTCAACAACATGAATCTTGTAAACTGTGGAAAGAGGGCTCCCGATCAGAGTATCACTACTCCGGAGAAGAGTAGTGCTACCCCTCCTGCACATTCTAAGTTTCGTGGGGTCACCAAAAATAGGTGGACGGATAGATACCAAGCCCGTCTTTGGGACGGTACCTGGAAAAAGCAGGGTGCCAAGCGAAATGGTAAACCAGGTGCATACGATTCGGCAGAACGCGCAGCAAAAGCTTACGATGTTGCAGCGATTAAATTCTGGGGTTTAACTGCCAAAACCAACTTTCCAGGGAGGGACTATGAAAAAGAGATGAAAGAGATGGAGCACATGACTAATGAAGAACTGGTGGGGAAGCTCAGGAGATTGCAGTGGTGTTTTCGTGAC…
PITA_21301	APFE030149439.1	scaffold29370:40975-41661(-)	MCGPEANLISLNGSLRVTPRDFNTSSESFKPSNNIFHFNHEFSSGGENEAIPLKDFEQPVFLFGRNINSKVKPLYSPKHDKSCTEQPVFLFGRNINSKVEPLYSPKHDLSEGYSPLLNAENDENSSAKSSGRKRKTLYRGISQRPTGKWYAKIRDPRKGITVWLGTFNTAEEAAKAYDAEAKKIRGKKAKLNFPDD*	TTAGTCGTCAGGAAAGTTCAGCTTCGCTTTCTTTCCTCTGATCTTTTTAGCCTCTGCATCATACGCCTTGGCGGCTTCCTCTGCCGTATTAAACGTTCCAAGCCAAACCGTGATGCCCTTTCTTGGATCTCGAATCTTTGCATACCATTTTCCCGTTGGACGCTGCGAGATACCTCTGTACAAAGTTTTCCTCTTCCTCCCGCTGCTTTTGGCCGAGGAATTTTCGTCATTTTCAGCATTTAGCAGAGGAGAGTAACCCTCAGATAAGTCATGCTTTGGTGAATATAAAGGTTCTACTTTGCTGTTTATATTCCGACCAAATAAAAAAACAGGCTGTTCTGTACACGACTTATCATGCTTTGGTGAATATAAAGGTTTTACTTTGCTGTTTATATTCCG…
PITA_21351	APFE031442164.1	C4623339:4388-5096(+)	MKPGNCENGCYVVSISLHNGKLVIHCETSPEKLDDQFDLAEFKAPEDLCAKFRRPSTQLEDRVRDSDATGLYFIGFLFMLFCLWLGFERAENEAIPPLKDFEKLRPKGKWAAEIRDPRKGIVVWLGTLNTTEEAAKAYDAEAKKIIGEKVKLDFPDHSCFVKVDTSQKMSGMKVKPCTEQPVLLFGGNINSKVKHLYSPKPDLSKGYS*	ATGAAGCCCGGAAACTGCGAGAATGGATGTTATGTTGTTTCCATCAGTCTGCACAATGGAAAACTGGTGATCCACTGTGAAACATCACCAGAAAAACTAGACGACCAGTTCGATTTGGCAGAGTTCAAAGCTCCTGAGGATTTGTGTGCAAAGTTCCGTCGCCCCTCCACGCAGCTTGAAGATAGAGTGCGAGACAGTGATGCCACTGGCCTGTATTTCATTGGTTTTCTTTTTATGTTATTTTGCCTCTGGTTGGGTTTTGAACGTGCTGAAAATGAAGCGATTCCTCCTCTGAAGGATTTCGAAAAGCTGCGTCCAAAGGGAAAATGGGCTGCGGAGATTCGAGATCCAAGAAAGGGCATTGTGGTTTGGCTTGGAACGCTTAATACGACAGAGGAG…
PITA_21392	APFE030191556.1	C4781647:14442-17760(+)	MQNRSRKRRSAESNNAQDSSQEESTVSNGDKQWALGVHGKRHPVYRGLRMRSWGKWVSEIREPRKKTRIWLGTFRTPEMAALSVRGNSAFLNFPHLASSLPRPVTLSPRDIQKAAAASTTDFHMPSAEYHNEDRSRDSVGTNSCGDTVMPAEPSIPKEAAAACVCDSAWISSFLSENESVIIDEDILFDLPNFLGSMAEALLVAPPWMLEPEVLYEYAYTLKVDEKSDVYSFGVVLLELITGRKPVGESEFGEGSKNLSTAAVTVQDNEKRDIEETPRRRRRSPVFRRRGNFAPVGLSGSAPRCCAFLRPYATRLTSLSVEEAQYLEEEQYDLGMGMMKASPVLFISVVLVFATFLRSSYSADPDLVRDFVTGLSTFTLRNIFKNGDVSTDTATFLTPI…	ATGCAGAATAGGTCGCGCAAGCGTCGTTCAGCGGAAAGTAACAATGCACAGGATTCTAGCCAAGAGGAGTCCACAGTCAGTAATGGAGATAAACAGTGGGCGTTGGGAGTTCATGGAAAGAGGCACCCTGTTTACAGAGGTCTGAGAATGCGGTCTTGGGGTAAATGGGTGTCGGAGATTCGAGAGCCCAGGAAGAAAACCAGAATTTGGTTGGGGACATTCCGGACGCCAGAGATGGCGGCTCTCAGCGTCAGGGGGAACTCGGCTTTTCTCAATTTTCCACACCTCGCCTCTTCGTTGCCTCGCCCCGTCACATTGTCACCCAGGGACATCCAGAAGGCCGCGGCGGCCTCTACGACTGACTTTCACATGCCTTCAGCAGAATACCATAACGAGGAT…
PITA_21543	APFE031239638.1	scaffold145201:66722-77380(+)	MAGDSTGRDNEEAGSVIEDDSNSLPALAGNSVCSNFSSFAGQTGLERMGSGISTVSSENTNIPSVQSQENSCKKLSSSQYKGVVPQPNGRWGAQIYEKHQRVWLGTFNHEDDAARAYDRAAIKFRGPDTITNFNFADIHPETVFLCGHSKYAIIDMLRKHTYDEELDQNKNTSHIDPKVACSNPLEPHEHLFDKTLTPSDIGLQLCSQLLRITSRTTYGTLNHQNTTYGNLVHRWQFDNTMAGTKNKFGFQIFEAT*	ATGGCAGGTGATTCGACGGGAAGAGACAACGAGGAGGCCGGGAGTGTGATCGAGGACGACTCGAACTCATTACCTGCACTTGCGGGCAACTCAGTCTGCTCTAATTTTTCTTCTTTTGCGGGTCAGACAGGACTGGAAAGAATGGGGAGTGGAATCAGCACCGTCTCCTCCGAGAACACCAATATTCCATCGGTGCAGAGTCAGGAGAATTCGTGCAAGAAGTTGTCGTCGTCACAGTACAAGGGTGTAGTGCCGCAGCCCAACGGGCGGTGGGGCGCGCAAATATATGAGAAGCACCAGCGCGTCTGGCTAGGGACCTTCAACCACGAAGACGACGCCGCCAGGGCCTATGACAGGGCTGCCATAAAGTTTCGAGGCCCCGACACCATCACCAATTTC…
PITA_21611	APFE031098216.1	scaffold165115:67471-69896(+)	MAYSGPWQHPTTGSPAGPLQKSQSPLQKRPRGRPRKVVDPSTGGSVGGQPVEGNTIKEAARDRPRKVVDPSTGGSVGGQPVEGNTIKEAARGRPRKVVDPSTGGSVGGQPVEGNTIKEAALGFAGGIEVTQGSVVPYSGVPTYRSQHVPASEREARVSHGEQSEEHKEKKTRKNKSTAQGTQKRHIGVKRKPWGKWEATIFDPSNGAKVSLGSFHTEEEAIRAYEEAACRFRNSQENRNTIDEVPQREGNCHQLQRATGTAGESQHFGAVERSNRITDTPDNIDLISQQFPGFHLYVQLLQNPGLSELPAIQRSLAMLLPNNSVQQPGSNTALSWPTQSIPVVSPSASQHPNPTSQVGEIAGGMDHNRGLSLLPVVQPHLPIPLPNPSLQQPWPTESVP…	ATGGCGTATTCTGGCCCATGGCAGCACCCCACCACGGGATCTCCCGCGGGTCCGCTACAGAAGAGTCAGAGTCCCCTACAGAAGAGACCCAGGGGCAGACCTAGGAAGGTGGTGGATCCCAGCACCGGTGGTTCTGTGGGTGGTCAGCCCGTCGAGGGAAACACAATCAAAGAGGCGGCCAGGGACAGACCTAGGAAGGTGGTGGATCCCAGCACCGGTGGTTCTGTGGGTGGTCAGCCCGTCGAGGGAAACACAATCAAAGAGGCGGCCAGGGGCAGACCTAGGAAGGTGGTGGATCCCAGCACCGGTGGTTCTGTGGGTGGTCAGCCCGTCGAGGGAAACACAATCAAAGAGGCAGCGTTAGGCTTTGCTGGTGGTATTGAGGTGACGCAGGGATCC…
PITA_21665	APFE030309661.1	scaffold220444:71628-115610(-)	MHGAYYWGDHGSLIVAKHMVEEENLHLHERWEKIPIPKLFLDSSVSIRIEYCPILLWKLGFKFLEGCAFMIYFYNGSNNKVDSSLEIRAQVIWNGESWLLVDNETSQMGTKGSFKNRYKPHVGEGLLSPNREMVTDFVKNIFTEYPSFARTIQRKCLGRSGKMSFPVMFMTKYLSGSQGIVTFDDCDGLSWRVEWYAYLQSGRRLVFTTGWPEFASDHNAKDGDILLVEVLNSEHFRVQILSGESCIAVKENKDPGCSREVASNINDILDARSKRFSSRETLQVFLKGGTLGNCIKAKRENRASAGYRRYRTWQENQSRKAKIGDKADMEVVRSKIGEYKHEVERETCSLTFDTIPKDKTTTVSQEQTGNHQPVSFFATKEASSSILGLTTIQDDCSSC…	TTAAGTTGAGACATGAGGTGCAGTGTCTTGTGGAATGTTTAAAACTTCACTGGCCTTTAAAATTTCCCCCAGAGCATCAAAAGCAGTGCCACCACTCAGTTCATTCCGATCACCAATCTTTGAATGATCTGAAGCAGAATAGGTACCCTTGATTTCAGTTTCAAGTGGAAAACTCATCATCCTTAAAGGCCTGTGCAGTTTTCCATCTGAATGCTCAGCAAGAAGCGTAATCACTAAATTATCATCAAGAACATTTGCTTTATTTCTGAAAGTCTCTATTGTACTTGGTTGACAACTAATGTCAAGTTTTGTTTGCTGTGAATAATCGTTATAGCAATCACTTGAGGCTTCATTTACTTCCAAAAGCTCTGTTTCTTTCTCAAAATCCTCTTGGCTTTG…
PITA_21865	APFE030959299.1	scaffold137610:93338-94051(+)	RLLYNPPHCLEMAMNPFEHYSDCTKATKDVTAGESMNMLELIRYHLLEVDDDIDIHHNGRGVCINVDDHGDIQADAAAAASTSKSSCQNSSSSSTPRHTQSSSVAAVIRSAEAVNVKVKPNQGNAEMNQRKTRYYRGVRRRPWGKFAAEIRDPCKKGARVWLGTFNTAEEAALAYDRAAFRIRGAKAAINFPLTFASNSESESAMDYMAAPKRKRRNGREGQQEVREGNSQAKCQKF*	AGACTGCTTTATAATCCTCCTCACTGTCTTGAAATGGCAATGAATCCATTTGAACATTATTCTGACTGCACAAAGGCCACGAAGGACGTTACAGCAGGGGAGAGCATGAATATGCTGGAGTTGATTCGCTACCATTTGCTCGAAGTAGACGACGATATTGATATTCATCATAATGGCAGAGGTGTTTGTATTAACGTTGATGATCATGGTGATATCCAGGCCGATGCCGCCGCCGCCGCCAGCACCAGTAAGAGCTCATGTCAAAACAGCAGCAGCAGCTCCACACCACGACACACTCAGTCTTCTTCTGTAGCCGCAGTCATAAGAAGCGCAGAGGCGGTAAATGTGAAAGTAAAGCCGAATCAGGGGAATGCAGAGATGAATCAGAGGAAGACCAGG…
PITA_21929	APFE031162777.1	scaffold228958:123775-124399(-)	MCELEANLISLNGSLRVTPRDFNTLFINGGAVSESFKPSNNIFHFNHEFSSGGENEAIPLKDFEQPIFLFGRNINSKVKPLYSPKHDLSEGYSPLLSVENDENSSAKSSGRKRKALYRGLTQRPSGKWAAKIRDPRKGITVWLGTFNMAEEATKAYDVEAKKIRGKKAKLNFPND*	TTAGTCGTTAGGAAAGTTCAGCTTCGCTTTCTTTCCTCTAATCTTTTTAGCCTCCACATCATACGCCTTGGTGGCTTCCTCTGCCATATTAAACGTTCCAAGCCAAACCGTGATACCCTTTCTTGGATCTCGAATCTTTGCAGCCCATTTTCCCGATGGACGCTGCGTGAGACCTCTGTACAAAGCTTTCCTCTTCCTCCCACTGCTTTTGGCCGAGGAATTTTCGTCATTTTCAACACTTAGCAGAGGAGAGTAACCCTCAGATAAGTCATGCTTTGGCGAATATAAAGGTTTTACTTTGCTGTTTATATTCCGACCAAATAAAAAAATAGGTTGTTCGAAATCCTTGAGAGGAATCGCCTCATTTTCACCACCTGAAGAAAATTCATGGTTGAAGTG…
PITA_21972	APFE030653844.1	scaffold143875:31220-31858(-)	MDMNMDMLELIRHHLLEVEDNIDIDIDIEGTSPLFFTPTAIESGDYINIDDHDDDTQANARATMASCQNIVSRTTLKENEIEFTQQNHSSSSPRCSVMKGAEAFQVKQQPRERENGKKREISARNYRGVRRRRGKFAAEIRDAAAKGARVWLGTFNTAEEAAHAYDQAAYRLRGARALLNFPLSFSCNSEKGSAVGNMTHKCKRGNSGSGVG*	TCATCCCACCCCGCTGCCACTGTTTCCTCTCTTGCACTTGTGTGTCATGTTACCTACGGCCGATCCTTTCTCTGAATTGCAAGAGAAGGAGAGGGGGAAGTTCAGAAGAGCCCGAGCTCCACGGAGTCTGTAGGCAGCTTGGTCATATGCATGAGCAGCCTCTTCGGCGGTGTTGAAAGTTCCAAGCCAAACCCGAGCACCCTTCGCGGCGGCATCTCTGATTTCTGCTGCGAATTTTCCCCGCCGCCGCCTCACTCCTCTGTAATTCCTGGCACTTATCTCTCTCTTCTTTCCATTCTCGCGCTCCCGTGGTTGTTGCTTTACCTGAAACGCCTCTGCTCCTTTCATAACTGAGCATCTTGGAGAAGAGGAAGAATGATTCTGTTGTGTAAATTCAAT…
PITA_22025	APFE031540022.1	scaffold15983:34806-56762(-)	MRTHDSGSVWESAFEGAGGFELQSASVRGVYILNGAVGRTNCPITPDVALRLGQCLLTAEADSSGDSSKPNYKSLAFKAMGNDLTRTDNENGMAGTEEDSSSSPVAASFLLPDKAGLEKMGNGINAAPSQNTHTPSGQRKLASSQYKGVVAQPNGRWGAQIYEKHRRVWLGTFNSEEDAARTYDKAAIKLRGDEAITNFNFADRHPEAFFLRSHSNSEIVDMLSRHTYDEELNKDDTTSFAAYPDIAWSTTKEPREHLFDKAVTPSDVGKLNRLVIPKQYAEKYLPLDQALIHDKGKGVLLNFEDSSTEKIWRFRYSYWNSSQSYVLTKGWNRFVKEKRLQAGDIVTIERASGSRRLFITFRRRPRYFLPPAVPPPSLGRCQLAINPLAAKDSPHREHL…	CTATGAGGGGGCAACGTTGATTCCATTCCCAATTTTTTCTAGCCCTGCCTTGTCCGGCAACAAAAATGAAGCAGCCACAGGTGACAAGCTCGAGTCCTCCTTGGTCCCAGCCATGCCATTCTCATTTTTTGTTCTAGTCAAATCATTACCCATTGCCTTGAATGCCAAGGACTTATAATTAGGCTTGCCTGAATCACTGGAGCTATTGGCCTCTGCAGTAAGAAGGCACTGGCCCAACCTTAGAGCCACATCGGAATATTGGGGCAATTGGTCCTGCCCACGGCCGTCTTTCCCATCGGAAAACAGCTCGGCGGCCGCTTCCCTCTTATTTGTGTGCTCAGTCATGCCCGGGCAAGAATTTAATGGGGACAGCTGCAGATTTACTCCAAATAGCCGGAC…
PITA_22192	APFE030184147.1	scaffold24276:138431-176743(+)	MIPLCSSSLPVKTFPQNCIWISNHDTQASNKSASTTKDGMKRFRKQKGAATSPAQDRTLKVQYPGYRGVRRRSWGKWVSEIREPKKKTRIWLGSFDTPEMAARAHDVAAFHLKGKKRALLNFPELIDCLPRPISLSPRDIQAAAAEAAVVFNRKKQEKRSPRNHPVSNEPSASSSHQLLCTAINSGFETASAEVSGQTDSGNSSSLCNPTEGIGERVAVEEDLFESLNLFTNLAEALMLSPPPLCGIHDDEHGLEEGFLWHKLLRITTTCISSNGLRSPAYAARPCFDEGTILKFRSKQLSALVSRFNQGTTQYAKFICFPPFNSQTSDFPQKSPLLNLNATLPEIRELAVLRAGETYALGMTPLAPTVASIANHLNSDPFAVTSHNSSDLLLHAHCTT*	ATGATACCCCTATGTAGTAGCTCCCTACCAGTTAAAACATTTCCCCAGAATTGCATATGGATAAGCAATCATGACACACAAGCAAGCAACAAATCTGCATCGACAACTAAGGATGGGATGAAGAGGTTTCGAAAGCAAAAGGGGGCTGCCACTTCCCCGGCACAGGACAGAACGTTGAAGGTGCAGTATCCAGGGTACAGAGGCGTGCGTCGTCGTAGTTGGGGGAAATGGGTGTCTGAAATTCGCGAGCCGAAAAAGAAAACGCGAATCTGGCTCGGCTCCTTCGATACGCCAGAAATGGCTGCTCGAGCTCACGATGTCGCTGCTTTCCACCTGAAGGGCAAGAAGCGTGCATTGCTTAATTTCCCAGAGCTCATCGATTGCCTCCCACGACCGATT…
PITA_22354	APFE031501687.1	C5028421:1721-3864(+)	MFPSHYIALALRRQIWRNPPESRQRHSRPPPEENPGKFCRKFKGIRMRKWGKWVSEIRMPKSTGRIWLGSYKTAEQAARAYDAAVYCLRGPNAKFNFPDSVPPIPSVSSLSHQQIQVAAAKYALNEIPLTLPSLQNINNKNNRMEKPPSPSRWSLALETEWACDKHAARAYEAAAYCLRGPNAKFNFPDPVSSIPSASTLSRHQIQAAAAKYALAEISSTSPSLQNIKTSKDKASHPRPYSVSEAECACDNRKISNMLNFGLCQCPFDGHRNLNLEKIPSIEGASVLGLIPNLQEGRGAKLGLQLVGPHRFVELLRDFWNLQGREGKKRSTCQMKIPYLYFVTVSSKHLVSTPSSLHFCLRDVAQDIYLYIGLAK*	ATGTTTCCCTCCCACTACATAGCGCTGGCATTGCGCCGCCAAATATGGAGAAACCCTCCAGAGTCCCGACAGCGCCATTCCCGGCCTCCTCCAGAGGAAAATCCCGGAAAATTTTGCCGCAAATTTAAGGGAATCCGAATGCGAAAATGGGGGAAATGGGTGTCCGAAATTCGGATGCCGAAATCGACAGGGAGGATCTGGCTAGGATCCTATAAAACTGCCGAGCAAGCCGCCCGTGCTTACGATGCGGCAGTGTATTGCCTGAGAGGCCCCAACGCCAAATTCAATTTCCCCGATTCCGTGCCCCCCATTCCATCTGTGTCTTCTCTTTCTCATCAGCAAATTCAAGTCGCTGCCGCCAAATATGCCTTGAACGAAATCCCTTTAACTTTGCCCTCT…
PITA_22465	APFE030179412.1	super2135:49044-60249(+)	MDNGIAFVPEAMLTPSQYAEAITKSAATGKGGIKRIRRQQEAAPSPPEEATLNQQSPPYRGVRRRNWGKWVSEIQEPKKKTRIWLGSFDTPEMAARAHDVAAFHLKGKKRALLNFPDLIDHLPRPISLSARDIQAAAAEAAVAFHSGSAENSGRSNDEYKRARRSPRKLSVCNESAVTCSLDELSAISSSDIEIASGEVSGQTDFFNNSSSVLCRPTEGICEWTAMDDCFEYFSLYTDLAEALMLPPPPLHSTEEVDAEEQKLEEGFLWPDFYRLKGKKE*	ATGGATAATGGAATCGCTTTTGTTCCCGAGGCTATGCTCACTCCCTCACAATACGCAGAAGCAATCACCAAATCTGCAGCCACAGGTAAGGGCGGGATCAAGAGGATTCGTAGGCAACAGGAGGCTGCCCCTTCGCCGCCAGAGGAGGCAACTTTGAATCAGCAAAGTCCACCGTACAGAGGCGTGCGTCGTCGCAACTGGGGGAAATGGGTGTCTGAAATTCAAGAACCGAAAAAGAAAACCCGAATCTGGCTCGGCTCCTTCGACACCCCAGAGATGGCCGCTCGAGCTCACGACGTCGCTGCATTCCACTTGAAGGGCAAGAAGCGCGCGTTGCTCAATTTTCCAGATCTGATTGATCACCTTCCACGCCCCATTTCTTTGTCTGCGCGCGATATT…
PITA_22477	APFE031730157.1	scaffold90540:631528-635686(-)	MWDLNHMPEANKEPQVVVPMEADQGNLCVGNGNFRDENVSGSSSSSSAACASELAEMDARSSQETGNGNGLGSEARVQTGKLFGFSFSNITKGNCAELSKGVSNGGGSGCGTNSVTRQFFPVGQEFDSQVMIPGRPQLPRAHWVGLTFRQAESFRSPTPKESAQPIKKSRRGPRSRSSQYRGVTFYRRTGRWESHIWDCGKQVYLGGFDTAHAAARAYDRAAIKFRGVDADINFNIDDYEEDVKQMNKLTKEEFVHVLRRQSTGFPRGSSKFRGVTLHKCGRWEARMGQFLGKKYVYLGLFDNEVEAARAYDKAAIRCNGREAVTNFSPELYESELALTEEKGQDPDLDLSLGNSTPKEGSLVSKDNTDGSMRPESDLSTLSEANWKTLTQPTVPNLMD…	TCAACCTAGAGACAAGTTCAATGAGTGGTCACTGGGTTTTTTCCCATAAGTGTTAATCAAAGCTGGTGCAGTGGTTGAATGCAAAATATTCTTGGTCTGCATTAATGCAGGCTGGAACAAGAAATGAAACCCCCTTTTCTGCAGCCATTCTGAAGAAGGACTAGTTGTTGAAGAAAATATTTGGGGTGAGAATCCTGATGATGCTGCACTTTCAATCATGGGAGAGGGAGGAGCTGGCCTATTTGTAGGCAGTTGCCAAACCCATCCTGGTGGTTGTTGAAACCTTTGCAAAGAGGGTACTTCACATGACCCTGCTGGTTGTTGATACCTTTGCAAAGAGGGTACTTCACATGACAAGCTTTGGGCGCTTTGATTTAATCCATCCATTAGGTTTGGAAC…
PITA_22509	APFE030896382.1	scaffold20588:111836-113541(-)	MTGLERRLPVHDEREAKQQQGQPTYSISSSMTASGSVRHHRASYPIRLKQEVRIGHKRRRDGLSAAAPHTCTGAASGGGSVRANSVDINQSKCNEFDSGKEKGSLGYPNRQPVVGSGFGIAKLQGLVKSDSDNARSQNQQVPVLLRESRDSLGDQSKRDEQRISINKSTTSAAMSTNPKHYRGVRRRRWGKWAAEIRDPVKGSRVWLGTFDTPEDAARAYDVAACRLRGSRAKLNLPDELPTSDRNSQQPPRLGNSQHLRHPTKTRQSQHFTAVGHPNPVTDCSFTIALISQHYPGFHLYVQLLQNPGLSSLPLIQHYLAMSLCNRSLQQPTSSTVLSRPAESALAASPSASQHSIPKPPYKESTVQFHSSQRLFSSSYKDSYSPLSKHHGPQGSRISG…	TCAATCTGAAGTTGGTGGAGGAAGATTCAGATCGTACAAAGAGACATTCTTTGGTTGGGACGCTTGCAAGCGTTCCCGGCCTGCAGACCTCTGAACGTTAAAATAGAGTGACTGTGATTCAAAACCCCCGGCTATGCCTGAAATTCTGCTTCCTTGGGGTCCATGGTGTTTTGATAATGGTGAATATGAATCTTTATAGGATGAGGAAAACAATCTTTGACTTGAGTGGAACTGGACTGTACTTTCTTTGTAGGGTGGTTTCGGAATAGAATGCTGACTGGCCGATGGAGAAGCCGCAAGAGCGCTTTCTGCAGGCCTAGAAAGAACTGTACTGGAAGTGGGTTGCTGCAACGAGCGGTTGCAGAGAGACATTGCTAGATAGTGCTGGATAAGAGGGAG…
PITA_22634	APFE031721858.1	C4414423:1097-2245(-)	MTTQSARVRVTRPARRMEVNQRRGKPGRDGVEILEECRLRNGEMEEFDTFGNLRLYIYEGNGRCNKILGVRSAMPGKWKSEIRCGGRQRISLGTFGRAEQAARAYDAACLALRGNSAVRNFPRLRKLLPQSRSQDPKDIKEAAKQATSETVSASLSLAETLAASGDIEEQEQQSTTSASFSLAETAAGAYDSACLALKGDDAVLNFQYLINLFPPSCSRNTNDIKETARQVVHLFCRKKNDAYSF*	CTAAAAAGAATACGCATCGTTCTTCTTTCGACAAAATAAATGAACGACTTGTCTAGCTGTCTCTTTTATGTCGTTGGTGTTCCGAGAGCACGATGGTGGGAATAAATTTATTAAATACTGGAAATTTAGCACTGCATCGTCTCCTTTCAGAGCTAGACAAGCACTGTCGTAGGCTCCGGCTGCGGTTTCTGCCAGTGAAAACGATGCACTGGTAGTGCTCTGTTGTTCTTGTTCTTCAATATCCCCCGATGCTGCTAAGGTTTCTGCCAACGAAAGCGATGCACTAACTGTTTCAGATGTTGCTTGTTTAGCTGCCTCTTTTATATCTTTGGGGTCCTGAGAACGCGATTGTGGCAATAACTTTCTTAAACGCGGAAAATTTCGCACTGCAGAGTTCCC…
PITA_22928	APFE031691925.1	C5045939:51745-54701(+)	MKGKPTDTFVTKGKIWEILKSNNMDRCMNSTAFFPHFMAGTTFCHNLYGFTASNASGLDGIAVPRYFWICPGLLHFHSSVIRFRQQKLSQSDEIPHQKHFLSKGLDLDGYKNSNHLDDDDDFFDFPDLFKENLSAKGLWIAKKECPLAGGGLATYPSHYKETTNTTRDSQCKGAAKTTSGRKKKKTMYRGIRQCTWGKWAAEIRDPKKGMRVWLGTFDTAEEAARAYDAEARKIRGKKVKLNFADDLLPPKKSKKVIKKLKDIITEESHKKTCMHLPESSASSGTEKPCMA*	ATGAAGGGAAAGCCCACTGACACCTTCGTTACAAAAGGGAAAATTTGGGAGATTTTGAAGTCGAATAACATGGACAGATGCATGAATTCGACAGCTTTCTTCCCACATTTCATGGCAGGCACGACATTCTGTCATAACCTTTATGGCTTCACGGCCTCCAACGCGTCAGGACTGGATGGGATCGCAGTCCCGCGATACTTTTGGATTTGCCCAGGATTGCTCCATTTTCATTCGTCAGTTATTCGGTTCCGGCAGCAAAAGTTATCGCAGTCCGATGAAATCCCTCACCAAAAGCATTTTCTGTCCAAGGGACTGGATCTCGATGGATATAAAAATTCTAACCATTTAGATGACGATGATGATTTTTTCGATTTTCCTGATCTTTTTAAAGAAAATTTA…
PITA_23504	APFE031410018.1	scaffold110901:62078-67169(-)	MAWELQNSGTPCNVAQNYSVDHISSADPTPLVRDFSEELNLFPLDKNDSEDMVLYGVLKEAISHGWKPESSVAVMGGAGSHQKNSQSGEVERKSVQRSKPAKKLAAKVTAEKHYRGVRKRPWGKYAAEIRDSTRHGVRVWLGTFETVEEAAMAYDQAASAMRGSNAILNFSLEVVCGSFKRRQVLLASSVKYSGGTSKISSGVTTSSTQLSDCHSRIQPPDKYGSLWCTLRRNPSRIKDFSSILLCMCFAKQLEEDVIIHMDDIMKDILLIVEPQIVGGRRQFIYKFVPKAPGESGSVIFTFSFLRETRDSAEDNLYPFVHLAPDGNLFIFANTRSILFDYLNDRIVRSYPDMPNGPRNYPSSGSSVLLPLDALAGDAEVMICGGAGNDSAFSELFGVS…	ctatgtcttcactttgctggagaagttgttgcagcaagaaactccttccttcaacttctttgacaccttcaaagagcctagagcaaactctgaataccactgttgggaatttttGTTTTCCAGCAAAATTCTTTCGCCGGACTTCGCCAGACATTTCACAAGAGCTTCCGAGCAAATCTCAAAAGCCTGGTTTAAAAACTTTACGGAATCACCATCGGCGCTGCCTCCTTCTTCCGTTTTAGCCAGCATAGTCTTTCCGAAATACAAACACTGTTCCACAAGCGCACGGTAACGTTCCGTTGCGTCTAACAAGAGTCCCTTGGCCCTGCCAAGCAAGGTGCAGGTGAGCGTCCTCTGAGACATTTCCCAGGCTGTTCTAGCCCTCGAAATAAGAAACTC…
PITA_23893	APFE030527412.1	scaffold48551:73352-83491(-)	MEGMRRLDEVLENDKEREKTPDQGVGLSLNTMSQGPHCSSRNSRPRTWRNKKSGASYSSYVGVRKRKWGSWVSEIRQPGKQSRIWLGSYSTPQEAPSAHDAAAFALRGDSAILNFPHLIQYLPRPPTSSPNDIKATAAAAATKIILLIGQSFLQSKTLDGMINELAGDNRTDEYSSIAANFNPTGQSIGSKLFDELNA*	TTAGGCGTTTAGTTCATCAAATAATTTGGAGCCAATAGATTGTCCGGTTGGATTAAAATTCGCAGCGATCGATGAATATTCATCGGTTCTATTATCTCCGGCCAGTTCGTTGATCATGCCATCTAGGGTTTTGCTCTGTAAAAAGGATTGACCGATTAATAAAATAATTTTGGTTGCTGCTGCTGCAGCAGTAGCTTTAATGTCGTTCGGCGAAGAGGTAGGAGGTCGAGGCAGGTACTGAATCAAATGGGGAAAATTGAGAATAGCAGAGTCGCCTCTCAGAGCAAAAGCTGCGGCATCATGTGCACTAGGTGCCTCTTGTGGGGTAGAATAAGAGCCGAGCCAGATCCTTGACTGCTTTCCGGGCTGTCTAATTTCGGAAACCCAACTCCCCCACTT…
PITA_24014	APFE030952215.1	scaffold98713:392129-393443(+)	MMLMGGMLSLIPIHCILSCIYITFGFRNPYAEVLRKQRAKQLYVADTLAVSGVPQSTNCTYYLIWQSTNSTYCFILGQTDYFNDIWCPLIHKIRSSSFPLLQPKASQIAKALNGSSCIKSPIFFPTGKEVRSMAAAYQEGQTEAASRDLPTKQICSGTVDVVDIENANDRNDKVEQSESNERWVENGRKFKGRGETRHPVYTGVRKRKWGKWVSEIREPKKKSRIWLGSFSTPEMAARAHDVAALCLKGPLALLNFPETVHHLPRPISNAARDIQEAAAAAAFVNPPITSPPSQTSLQAVDLQEKAEDIEIDIKQSADFSKVDLTAFLANTPYDMLDGQYFNSDEFDEDDSRAGELVLWQFSQ*	ATGATGTTGATGGGTGGAATGCTCTCTCTCATTCCAATCCATTGCATCTTATCATGTATATATATCACATTTGGCTTTCGTAATCCGTATGCAGAAGTGCTTCGAAAACAAAGAGCAAAGCAGCTCTATGTAGCGGATACTTTAGCGGTATCCGGTGTCCCACAATCCACAAATTGCACATATTACCTCATTTGGCAATCCACAAATTCCACATATTGCTTCATTTTGGGGCAGACAGACTACTTCAACGATATCTGGTGTCCTCTCATTCACAAAATTCGGTCTTCTTCATTCCCACTGCTGCAGCCAAAAGCATCACAAATTGCCAAGGCATTGAATGGATCCTCCTGTATAAAATCTCCCATATTCTTCCCCACAGGCAAAGAGGTGAGGTCAATG…
PITA_24033	APFE030747667.1	scaffold80780:81449-82506(+)	MAKPQRYRGVRQRQWGSWVSEIRHPLLKTRVWLGTFETAEDAARAYDEAAILMCGPHRAKTNFTYDPTAPPSSKPSFLSEALAGKLRQCYLASRNIEMQEGTANKHQLQSPIMTPSLSRLRLDMERSNLENQLWESNWVMTDKFCSHNDRYERPYPQQETEDDIALEMVQELFHPTSIEFSSQSDNSDICNGQNATDCVVKSENSAQSSMFIAW*	ATGGCGAAACCGCAGAGATACAGAGGCGTGAGACAACGTCAGTGGGGTTCTTGGGTTTCTGAAATTCGCCACCCTCTCTTGAAAACCAGAGTGTGGCTGGGGACATTTGAGACAGCAGAAGATGCAGCGCGTGCCTATGACGAAGCTGCAATACTGATGTGTGGGCCTCATCGTGCAAAGACCAATTTCACATATGACCCCACTGCACCACCATCTAGCAAGCCTTCTTTTCTTTCTGAAGCACTGGCCGGCAAGCTTCGCCAATGCTATTTGGCTTCTCGCAACATTGAAATGCAAGAGGGCACTGCTAATAAACATCAGTTGCAGTCACCCATTATGACACCCTCTCTCTCTCGTCTGAGATTGGACATGGAGAGGTCCAATCTGGAAAATCAGTTG…
PITA_24062	APFE030281334.1	scaffold218727:7130-9435(-)	MDEILPQALAGEDGAERSSQFKGIRYRKWGSWVAEIRMPRSRQKLWLGSYTTAEQAARAFDAVGDDAAVYCLRGPNAVFNFPDSLPSIPSASSLSRHQIKLAAAKHATLEQPPPISPSAHSNDENANANANQKKARRQGRTLHFHQARLLFKKQCRRGTVGISKNKSWRCGRVCLRNQVIASPGIRRDCDQFGRGSSSTMKRRTSPTLTISQTCGTSMIFELFRELRPNIDGSFYDELLIKPIEINVSRLYIMVQ*	TCATTGTACCATAATATAAAGCCTTGAAACATTTATTTCTATAGGTTTGATGAGAAGTTCATCATAAAATGAACCATCAATATTCGGCCTAAGCTCCCGAAACAATTCAAATATCATCGAAGTTCCACAGGTCTGTGAAATTGTCAAAGTTGGTGATGTCCTCCTCTTCATTGTGCTGCTGCTCCCTCTCCCAAATTGATCGCAATCTCTCCGAATTCCAGGTGAGGCAATCACCTGATTCCGCAAGCAGACTCTCCCACATCGCCAACTCTTGTTCTTGCTGATGCCCACTGTCCCTCGACGACACTGTTTCTTGAACAGAAGCCGAGCTTGATGGAAATGCAGCGTCCTTCCTTGCCTTCTTGCTTTCTTCTGATTGGCATTGGCATTGGCATTCTC…
PITA_24143	APFE031706912.1	C5125651:10179-10766(+)	MCGPEANLISLNGSLRVTPRDFNTSSESFKPSNNIFHFNHEFSSGGENEAIPLKDFEQPVFLFGRNINSKVKPLYSPKHDSPLLSAENDENSSAKSSGRKRKTLYRGITQRRWGKWAAQIRDPRKGITVWLGTFNTAEEAAKAYDAEAKKIRGKKAKLNFPDD*	ATGTGTGGACCTGAAGCGAATCTCATTTCCCTCAACGGGTCTCTGCGTGTAACTCCCAGGGATTTCAATACGTCGTCGGAATCTTTCAAGCCCAGCAACAATATTTTCCACTTCAACCATGAATTTTCTTCAGGTGGTGAAAATGAGGCTATTCCTCTCAAGGATTTCGAACAGCCTGTTTTTTTATTTGGTCGGAATATAAACAGCAAAGTGAAACCTTTATATTCACCAAAGCATGACTCTCCTCTGCTAAGTGCTGAAAATGACGAAAATTCCTCGGCCAAAAGCAGCGGGAGGAAGAGGAAAACTTTGTACAGAGGTATCACGCAGCGTCGATGGGGAAAATGGGCTGCACAGATTCGAGATCCAAGAAAGGGCATTACGGTTTGGCTTGGAACG…
PITA_24247	APFE031162228.1	scaffold115999:109870-111051(+)	MDEDVNDAKEVNYSGVRKRPWGKYGAVIRDPSIKRRRWLGTFDTAEEAARAYDNAARTLKGVKAKTNFPAPSLPLDTVDIQRCTRAATNAPLPSPPANHDNNKNGLSVNISEQIKPGTHVYMNDGLETQRVEEHSMSPWCIPNIIPTNLIDFAILLQQQLPPMVMPLWGKIVAPDMIKKPNNNEWVEAGVMNKKLPTASLQTGTCDLYSSSLVLDIQLSRNDPPTKETATPKLYRSILKEEITITCTDH*	ATGGACGAGGATGTGAATGATGCCAAGGAAGTGAATTACAGTGGCGTGAGAAAGAGACCGTGGGGTAAATACGGGGCTGTGATCAGAGATCCCTCCATTAAAAGACGCAGGTGGCTGGGTACCTTCGACACTGCCGAGGAAGCAGCAAGAGCATATGATAATGCCGCTAGAACTCTGAAAGGAGTCAAGGCGAAGACCAATTTCCCAGCTCCCTCCCTCCCTCTAGATACAGTCGACATCCAGAGATGCACCCGGGCCGCCACTAACGCTCCTCTTCCCTCTCCGCCTGCTAATCACGACAACAACAAGAATGGGTTGTCTGTCAATATCTCTGAACAAATAAAGCCCGGGACGCACGTTTATATGAATGACGGATTGGAAACGCAAAGAGTGGAGGAA…
PITA_24252	APFE030828772.1	scaffold153635:41476-42489(+)	MALNRINPEVEYTEMSVLDLLDDLEPSFFTRNWRPHTTTNCSPEEENFIRTALTPELVDDCRLEMERPETTIAAVKSCRPSLSVSVTRHQCLDWQKIPVDWGLKNSVSPSASPCLSAAWTKLPLDVNDSEDMVLYGILKEAANKGWMPGTPEEEPVMEIKKEAAFPVKREAVVRQETEATPPPPKNVGRHYRGVRRRPWGKFAAEIRDSTRQGARIWLGTFSTGEEAAFAYDRAAYKMRGSRALLNFPLQVGNLEDSNTSSTTSSSEKVESSDWSRKREREEVMSVQWYRQCQPRLEDSNNMVEELLCEKMATQPLTPRGIDMSFTGFLYRGHLAVN*	ATGGCATTGAACAGAATAAATCCAGAAGTTGAGTACACAGAAATGAGCGTTTTGGATTTACTCGACGATCTCGAACCCTCCTTCTTCACACGGAATTGGCGGCCTCATACCACAACAAATTGCAGTCCCGAAGAAGAAAACTTTATCCGGACCGCACTCACGCCCGAATTGGTCGATGACTGCAGGCTGGAAATGGAGAGGCCGGAAACAACGATAGCCGCCGTTAAGTCCTGCCGTCCCTCGCTCTCCGTCTCCGTTACTCGACATCAATGTTTAGACTGGCAAAAAATTCCTGTCGATTGGGGGCTCAAGAATTCCGTGTCTCCGTCTGCGAGCCCTTGTTTATCTGCTGCCTGGACGAAGCTCCCGTTAGATGTGAACGATTCGGAAGACATGGTT…
PITA_24497	APFE031681176.1	C4258237:2025-3803(+)	MTSESVNNMNLVNCGKRAPDQSITTPEKSSATPPAHSKFRGVTKNRWTDRYQARLWDGTWKKQGAKRNGKPGAYDSAERAAKAYDVAAIKFWGLTAKTNFPGRDYEKEMKEMEHMTNEELVGKLRRLQWCFRDTEQAWDSVEARPSIAGLADTEEEAAVAYDTAALKHWGPHKLVATNFDVKNYDLDQIRRPELCHSKREINTCTATASEPKSACPYKFNPHIHENNLRHHAVG*	ATGACTTCTGAATCTGTCAACAACATGAATCTTGTAAACTGTGGAAAGAGGGCTCCCGATCAGAGTATCACTACTCCGGAGAAGAGTAGTGCTACCCCTCCTGCACATTCTAAGTTTCGTGGGGTCACCAAAAATAGGTGGACGGATAGATACCAAGCCCGTCTTTGGGACGGTACCTGGAAAAAGCAGGGTGCCAAGCGAAATGGTAAACCAGGTGCATACGATTCGGCAGAACGCGCAGCAAAAGCTTACGATGTTGCAGCGATTAAATTCTGGGGTTTAACTGCCAAAACCAACTTTCCAGGGAGGGACTATGAAAAAGAGATGAAAGAGATGGAGCACATGACTAATGAAGAACTGGTGGGGAAGCTCAGGAGATTGCAGTGGTGTTTTCGTGAC…
PITA_24554	APFE030322408.1	scaffold200020:15225-30098(+)	MLIGSATRVPRKLRWMARREMKREIGVCEQEASSALKETHFRGVRKRPWGRFVAEIRDPLKNTRVWLDTFDTAEEAALAYDNVSRNLCDAKAKTNFGPSPLHDGKPLFNDGVFAQKRDPPPWLGLCTKQESSVPVLPSLDVQGSTCVNIGNLAPRPALVIAQILENLPSPQPDPDFLFSLGPYSGSSPINASQNGFSIWYIVDAEGKSFVEEKPYVVVIVSEDLPGDLASLIPTPQDHALGRNESYSRFVNRSLYRRSHQIENKQRYIEIAKNVEIAFDEGLSGSSKEKPPQPIVQEGYTGPDLKTQVQRNLQLRIESWGKYLQTILNKSHQTLTLEASTSACLEATIAKLPDLASKLPTKSVKPTYSAMKVTPLMEIHRQDHGYLEVKPHLRDHCFEN…	ATGTTAATTGGCTCCGCAACTAGGGTTCCAAGGAAACTGAGGTGGATGGCCAGAAGGGAAATGAAGCGTGAAATAGGAGTCTGTGAGCAGGAAGCTTCGTCGGCCCTGAAGGAAACGCATTTTAGAGGCGTGAGGAAAAGGCCGTGGGGGAGATTCGTGGCGGAAATTAGAGATCCCTTGAAGAATACTAGAGTTTGGCTCGACACTTTTGACACTGCCGAAGAAGCTGCCCTAGCCTACGATAATGTTTCCCGGAATCTCTGCGACGCCAAGGCGAAGACCAATTTTGGCCCCTCCCCTCTGCACGACGGTAAGCCCCTGTTCAACGATGGCGTCTTTGCTCAGAAACGAGACCCTCCACCGTGGCTTGGTTTGTGTACCAAGCAAGAGTCGAGCGTT…
PITA_24646	APFE030925996.1	scaffold50173:359526-360152(+)	MEIPPSQEQNHRHAQPNEVSGRTSRQFKGIRLQEWGKWVSEIREKIYLGYYKTAEQAARAFDAAMYCLRGPNAKLNFPDSVPAIPSAFAASKYALNELPATSPSLHDNSKEEPSHRSQSSSVSHMELSNDAQHETEDSAFWKSRFAEPDSVEYLNLEKIQSIDEELALELIPTSQEEEVDISEQPIGLWNFEDS*	ATGGAGATACCCCCGTCGCAGGAACAAAACCATCGCCATGCTCAACCTAACGAAGTTAGCGGACGAACATCCCGCCAATTTAAGGGAATCCGACTGCAAGAATGGGGGAAGTGGGTATCGGAAATTCGGGAGAAGATCTATCTTGGCTACTACAAAACCGCCGAGCAGGCCGCCCGAGCCTTCGACGCTGCAATGTATTGCCTGAGAGGGCCAAACGCTAAATTGAACTTTCCCGATTCTGTGCCCGCCATTCCGTCCGCGTTTGCCGCTTCCAAGTATGCCTTGAACGAACTCCCTGCCACTTCGCCTTCTCTGCACGATAATAGTAAAGAGGAACCCTCACATCGCTCGCAGTCGTCCTCGGTATCTCACATGGAATTGTCGAATGACGCCCAGCAT…
PITA_24731	APFE031225218.1	scaffold135225:122315-124362(-)	MTARTVASVALDGCKGQAPKRSSATANLWQSEIDSPDVELSLACCPPDVEMGSTICSEKNASASNPANHDLRRQVQCAGDEDREQTTNEAMKGDYSTEDKQDDEVASATTEEFSSCFTGVSENATHLKQEGAVLKDWASTISMGRNHGGLERKGSGTSGMSGSGAESEDLRRYFVSMEQAGKLPSSQYKGVVPQPNGRWGAQIYEKHQRVWLGTFNKEEDAARAYDRAALKFRGRDAMTNFSLVGEADPEARFMREHTKEEIVEMLRKHTYAEEFHHHSKRIKFTVSRSATTNNVGASGAEGFSLRANDVCHESQVAVHEHANVASAADVPACVPREHLFDKAVTPSDVGKLNRLVIPKQHAEKYFPLDVNSSEKGLILNFEDNMGNVWRFRYSYWNSS…	TCAAGGAATTAATAGATTTAACTGTCCGCGGTGCTGTGCTGACAATCTCTGAGGTTCCGCCAAAGTCACTCCGAAAAGCCTTACTCCTTTCGTGGTCGCGGGATCGAGACTCGATGCCGCTTTGAGTTCCGAGGTTTCCAAATCTGGTGCCGTGGAGGGCCAAGCAGGTCTGACGAAAGGATGCAGAGGCTTCATATTAGTACTTCCGTTGCGGGAATTGAGCGAGTTGTGGAAGTTGAGATACAAGTCCATAGTTGGCAACCCGTCGGGCCTAATGTCGTATATGCTCAGCTGCTCCGTTTGTTTGGCGGCCGGAGGGGACGAGATGTGGAAAGGAAGCGAGCCGTTGGGAGTAGTTACAGGGCTCTGAGACCACAGGGAATTGACATGACCGACTTT…
PITA_24988	APFE031030641.1	scaffold111535:88459-90569(+)	MVKPQSGEASHSSALKSQSQSDNNGARSPNLSPSKFSEKQFKRGKEAGRFRGVRRRPWGRFAAEIRDPKTKERRWLGTFDTAEEAAYAYDFAARTMRGMKARTNFIYVDPEAYMTFSQPQCAAVPANNTEVPTDIKSPLFQRHEKPQNSWVDSLCRASSTKPISYNEQKQQQQQQQKQLSLNGSYNLLGDESCSISTPCTGIDPTGLMIRADLESLFKVL*	ATGGTGAAGCCACAGTCTGGGGAAGCATCCCACTCTTCAGCTCTCAAATCTCAATCTCAGAGTGACAACAATGGTGCTCGCTCCCCAAATCTGAGTCCTAGCAAGTTCTCAGAAAAACAGTTCAAGAGAGGCAAGGAGGCCGGGAGATTCAGAGGGGTCCGCAGGCGTCCATGGGGTCGTTTCGCTGCAGAAATCAGGGACCCGAAAACAAAAGAGCGCCGTTGGCTTGGAACTTTCGATACAGCAGAAGAAGCTGCCTATGCCTATGATTTCGCTGCCAGAACCATGAGGGGGATGAAGGCACGGACCAACTTTATATATGTCGATCCAGAAGCCTATATGACCTTCTCACAGCCACAATGTGCTGCAGTTCCTGCTAATAATACTGAAGTGCCCACT…
PITA_25005	APFE031161426.1	scaffold65613:82928-84028(-)	MALKTACPHGAEGSYDYRQQHGLSVSAERLLEDVWAHFINAAGSDHRLIHDDELQPAASSNDAKEGSCWNPEISVPPLKVNDSEDMILFELLNEAAKHGWSASHQQQETVISGETVISGATGSTARTPVIYKTQTIGPQSEVTKRYRGVRRRPWGKFAAEIRDSARQGARVWLGTFNTAEEAAMAYDKAALLIRGKRASLNFPVDVVTKALADTNYRCTSKLISSRQKRIKVCDDHFELRNKMEAPDVDSLAADFKKYIAEEDDGMTTMRQKRTRESSIRSSDDIQEVGSVLLEIPASDPNHLTSGACGLIKDVQMSSNICLALDSPVVELQDLGSDYLEDLLLSTELSNDFLRIPLPSFFDILQT*	TTATGTTTGCAAGATATCAAAGAATGAAGGCAAAGGAATGCGCAGGAAATCATTAGAGAGCTCTGTTGATAGAAGCAAATCTTCCAAGTAATCGCTCCCAAGGTCTTGCAACTCTACAACAGGGGAGTCTAAGGCTAAGCATATATTGCTACTCATTTGCACATCCTTAATGAGCCCGCAGGCACCACTGGTTAGATGGTTCGGATCTGATGCAGGGATTTCCAATAATACTGACCCCACCTCTTGTATGTCATCACTACTTCTAATACTACTCTCTCTCGTTCTTTTCTGCCGCATGGTGGTCATTCCATCATCTTCTTCTGCAATATATTTCTTAAAATCCGCTGCAAGAGAGTCTACATCTGGTGCCTCCATTTTGTTTCTTAATTCGAAATGATC…
PITA_25056	APFE031706912.1	C4398593:8691-9278(+)	MCGPEANLISLNGSLRVTPRDFNTSSESFKPSNNIFHFNHEFSSGGENEAIPLKDFEQPVFLFGRNINSKVKPLYSPKHDSPLLSAENDENSSAKSSGRKRKTLYRGITQRRWGKWAAQIRDPRKGITVWLGTFNTAEEAAKAYDAEAKKIRGKKAKLNFPDD*	ATGTGTGGACCTGAAGCGAATCTCATTTCCCTCAACGGGTCTCTGCGTGTAACTCCCAGGGATTTCAATACGTCGTCGGAATCTTTCAAGCCCAGCAACAATATTTTCCACTTCAACCATGAATTTTCTTCAGGTGGTGAAAATGAGGCTATTCCTCTCAAGGATTTCGAACAGCCTGTTTTTTTATTTGGTCGGAATATAAACAGCAAAGTGAAACCTTTATATTCACCAAAGCATGACTCTCCTCTGCTAAGTGCTGAAAATGACGAAAATTCCTCGGCCAAAAGCAGCGGGAGGAAGAGGAAAACTTTGTACAGAGGTATCACGCAGCGTCGATGGGGAAAATGGGCTGCACAGATTCGAGATCCAAGAAAGGGCATTACGGTTTGGCTTGGAACG…
PITA_25139	APFE031298980.1	C4688569:13716-14864(-)	MTTQSARVRVTRPARRMEVNQRRGKPGRDGVEILEECRLRNGEMEEFDTFGNLRLYIYEGNGRCNKILGVRSAMPGKWKSEIRCGGRQRISLGTFGRAEQAARAYDAACLALRGNSAVRNFPRLRKLLPQSRSQDPKDIKEAAKQATSETVSASLSLAETLAASGDIEEQEQQSTTSASFSLAETAAGAYDSACLALKGDDAVLNFQYLINLFPPSCSRNTNDIKETARQVVHLFCRKKNDAYSF*	CTAAAAAGAATACGCATCGTTCTTCTTTCGACAAAATAAATGAACGACTTGTCTAGCTGTCTCTTTTATGTCGTTGGTGTTCCGAGAGCACGATGGTGGGAATAAATTTATTAAATACTGGAAATTTAGCACTGCATCGTCTCCTTTCAGAGCTAGACAAGCACTGTCGTAGGCTCCGGCTGCGGTTTCTGCCAGTGAAAACGATGCACTGGTAGTGCTCTGTTGTTCTTGTTCTTCAATATCCCCCGATGCAGCTAAGGTTTCTGCCAACGAAAGCGATGCACTAACTGTTTCAGATGTTGCTTGTTTAGCTGCCTCTTTTATATCTTTGGGGTCCTGAGAACGCGATTGTGGCAATAACTTTCTTAAACGCGGAAAATTTCGCACTGCAGAGTTCCC…
PITA_25174	APFE031339443.1	scaffold10177:147898-149911(-)	MENFPEQEPDNAIALPHEDRGSRQFKGIRLRKWGMWVSEIRMPRSRKKIWFGSYTTPEQAARAYDAAVYCLRGCNAKFNFSVPDIPTPSNLSREQIQHAAAEYALSQAPSSLASFLGSPSQSSSVSEMELAGNNHEICEERQDLALWWSMLAGSNGAGIPNLEIWPSTDEVLAAELLPNSEEQDDEADTSMEFPIRLSLSDDEADNPHFLFTWSQLNVGPLPVVVKTVGYK*	TTATTTATATCCCACAGTTTTGACTACGACAGGAAGAGGTCCCACATTCAACTGACTCCACGTGAATAAAAAATGCGGATTGTCTGCTTCATCGTCCGACAAACTCAACCGTATTGGAAATTCCATTGATGTGTCTGCTTCATCGTCCTGCTCCTCTGAGTTCGGAAGGAGCTCCGCCGCCAACACCTCGTCAGTCGACGGCCATATTTCCAAATTCGGAATCCCAGCGCCGTTAGATCCCGCCAGCATCGACCACCACAGCGCCAAGTCCTGCCTCTCCTCACATATCTCATGGTTGTTTCCCGCCAACTCCATTTCTGAAACCGAAGACGACTGCGAGGGGGACCCTAGGAAAGAGGCCAAACTCGAAGGGGCCTGGCTCAAAGCATATTCGGCGGC…
PITA_25177	APFE030184147.1	scaffold24276:102630-103397(+)	MGSSSTDTGAGSKDGSITKSGVKRIRTQDETAPSPPPERTLKVQHPAYRGVRRRSWGKWVSEIKEPKKKTRTCLGSFDTPEMAARAYDVAEVYLKGKKQALLNFPELIDHIPRPISLKPRHIQDAAAEAAVAFHLASAGNSEWSSDSNKRTRGSPRNPPVSNELSSSHQLCTGISSHSETETVERSGQLDSSKSSSVCTPTESVGDSQCAVMEEDLFESFNLLTDLAEALLLSPPLFSIQEEERNLEEGFLWSDC*	ATGGGGTCTTCGTCAACAGACACAGGGGCAGGCAGCAAAGATGGATCGATAACTAAGAGTGGGGTCAAGAGGATTCGAACCCAAGACGAGACTGCTCCTTCGCCGCCACCAGAGAGAACATTGAAGGTACAGCATCCAGCATATAGAGGCGTTCGCCGTCGTAGTTGGGGGAAATGGGTGTCTGAAATAAAGGAACCCAAAAAGAAAACCAGAACTTGTCTCGGTTCCTTCGATACACCAGAGATGGCGGCTCGAGCCTACGACGTCGCTGAGGTCTACTTGAAGGGCAAGAAACAGGCTTTGCTTAATTTCCCAGAGCTAATTGATCACATTCCGCGCCCAATTTCTTTGAAACCGCGCCACATCCAGGATGCCGCTGCAGAAGCAGCTGTTGCATTC…
PITA_25473	APFE031745142.1	C4860657:20110-21122(-)	MPQSDLDSAACDNDGGSYIEPTNTEEQSNAMAVVDGGVRSLIPQACHTEGRTSVVGDPNANSMGERLRKYRGVKLTNRKWRAQASYRKNDPEKSKKSVHLGTFPTAEMAAVAYDAAVLVLRGESRANRLNFPEYSPHIKSIVEGFSPSDIASNMKYVASKAAKNIGHLLSLENKDSQQEDEGFEVSAAMPAAAISSSSASLMSSNIAGVKQRIKEVARAAGRERQIRRKIYDDKQDSGISCFSVMQEPEHECSTPVGIAKNNVNNEKIHPGQSSR*	CTATCTGCTTGATTGCCCAGGGTGGATCTTCTCATTATTCACATTATTTTTTGCAATGCCCACCGGAGTACTGCACTCGTGTTCAGGCTCCTGCATGACCGAGAAACAGCTGATACCGCTATCTTGTTTATCATCGTAGATTTTTCTTCTTATTTGGCGCTCTCTTCCTGCAGCACGGGCCACCTCCTTTATACGTTGCTTTACTCCCGCTATATTGGAAGACATCAATGAAGCTGAAGAAGAACTAATGGCGGCAGCTGGCATTGCAGCAGAAACTTCAAATCCCTCATCCTCCTGTTGGCTATCCTTATTCTCCAGACTAAGTAGATGTCCTATGTTTTTCGCAGCCTTCGACGCTACGTACTTCATGTTACTTGCAATATCTGAAGGAGAAAAGCC…
PITA_25668	APFE030709554.1	C4091545:1252-2400(+)	MTTQSARVRVTRPARRMEVNQRRGKPGRDGVEILEECRLRNGEMEEFDTFGNLRLYIYEGNGRCNKILGVRSAMPGKWKSEIRCGGRQRISLGTFGRAEQAARAYDAACLALRGNSAVRNFPRLRKLLPQSRSQDPKDIKEAAKQATSETVSASLSLAETLAASGDIEEQEQQSTTSASFSLAETAAGAYDSACLALKGDDAVLNFQYLINLFPPSCSRNTNDIKETARQVVHLFCRKKNDAYSF*	ATGACAACCCAAAGCGCAAGGGTTCGAGTTACACGCCCTGCTCGCAGGATGGAGGTGAATCAGAGGAGAGGAAAACCTGGGCGCGACGGAGTTGAAATACTGGAGGAGTGCAGGTTGCGAAATGGCGAAATGGAAGAGTTCGATACCTTCGGAAACCTCCGCCTATACATTTACGAAGGAAATGGACGGTGTAACAAAATATTGGGTGTGCGTTCTGCAATGCCTGGAAAATGGAAGTCTGAAATTCGATGTGGTGGCCGTCAACGGATCAGCCTGGGTACTTTTGGTCGAGCAGAACAGGCAGCCAGAGCGTACGACGCTGCTTGCTTGGCTCTGAGAGGGAACTCTGCAGTGCGAAATTTTCCGCGTTTAAGAAAGTTATTGCCACAATCGCGTTCT…
PITA_25673	APFE030679108.1	scaffold225418:19428-20558(-)	MAIYSTKQEQDLCTEMSVLDRIRSHLLEDFEGKDEESSFCVMTGNIPSYNRNSSPEVESFIQSVLACEYVDGNGPEIETETEMPTTAVKPSRPLLSVSVPRLESLGWEKFSVGRGCRNSLGVTPPSVSPCLSTAWAKLPLNENDSEDMVLYGILKEAANEGWMPVTPKDETAIETKKEADVFPVKEDAENFPVKKEADVPQETRTQQPVAKKKNVGRHYRGVRQRPWGKFAAEIRDSARQGARVWLGTFNTAEEAAFAYDRAAYKMRGSKALLNFPLQVASGSDKTCSSVEKPKSNGENFLQHLTTRKREPSASAEVDSGRECRVKLEEITRENDMMSKDMVDELLYGRMTTPPLTPSGIDMSFSNFLCPGQLMVN*	TCAGTTGACCATAAGTTGTCCAGGGCAGAGGAAATTGGAGAAGCTCATGTCGATTCCACTAGGTGTGAGTGGCGGTGTTGTCATTCTCCCATATAAAAGCTCATCCACCATATCCTTCGACATCATGTCGTTCTCCCTCGTAATTTCTTCCAATTTCACCCGACACTCTCTGCCAGAGTCGACTTCAGCACTGGCACTGGGTTCCCTCTTCCTGGTGGTGAGATGTTGAAGAAAATTCTCGCCATTACTCTTTGGCTTCTCTACACTGCTACATGTCTTATCGCTCCCTGAAGCAACCTGTAGCGGGAAATTAAGCAAGGCCTTAGAACCCCGCATCTTGTAAGCAGCACGGTCATAGGCGAAAGCCGCCTCCTCCGCGGTATTGAAGGTGCCGAGCCA…
PITA_25834	APFE031092627.1	scaffold22802:310700-311733(+)	MNSSLNDKKRKRTAPTLTAPDENVSDSQQQQQNSTYRGVTKHRWTGRYEAHLCDGAWKREGAPRNGRQGGYDSAEKAARAYDLAALTFWGPTAKTNFPSTNYEKQIEEMEGKTKEEIVGILRRSQFFRL*	ATGAATTCCTCATTGAATGATAAGAAGCGGAAGCGGACTGCGCCTACTTTAACTGCCCCCGACGAGAATGTCAGTGATAGTCAGCAGCAGCAGCAGAATTCTACATATCGTGGAGTAACAAAACATAGATGGACTGGTAGGTATGAAGCCCATCTATGTGACGGTGCCTGGAAAAGGGAGGGAGCTCCCCGAAATGGTAGACAAGGTGGATACGATTCAGCGGAAAAGGCGGCAAGAGCTTATGATCTTGCAGCTCTGACATTTTGGGGTCCAACCGCCAAAACAAATTTTCCGTCTACCAATTATGAGAAACAGATCGAAGAGATGGAAGGCAAGACTAAAGAAGAAATAGTGGGAATTTTGAGGAGGTCTCAATTTTTTCGTCTTTAA
PITA_26009	APFE030328060.1	C4317143:486-1090(+)	MCGGEPTFISLNQSRLVTLRDLDTIVDLSMNGGASMTCLEPFNKSGNFDDEYKQKLEPNKNIFNCKHEVSSSAENEAIPPLKDFMIPPLKDFEMSSSKTTRRKRTNLYKGIRQRQRGKWVAKIQDTRKGTMVWLGMFNMSEEATKACDVEAKKIRGKTAQSLVFYKSGH*	ATGTGTGGAGGTGAACCAACTTTCATTTCTCTCAACCAATCTAGGCTTGTAACTCTGCGGGATTTGGATACAATTGTTGACTTGTCCATGAATGGTGGAGCTTCAATGACTTGTTTGGAACCCTTCAATAAATCAGGCAACTTCGATGATGAATATAAGCAAAAACTTGAGCCCAACAAGAATATTTTCAACTGCAAGCATGAAGTTTCTTCGAGTGCTGAAAATGAGGCAATTCCCCCTTTGAAGGATTTCATGATTCCTCCTCTGAAGGATTTTGAGATGTCCTCAAGCAAAACCACCAGAAGGAAGAGGACAAATTTGTACAAAGGTATTAGGCAGCGTCAAAGGGGAAAATGGGTTGCGAAGATTCAAGATACAAGAAAGGGCACTATGGTTTGG…
PITA_26078	APFE031139399.1	scaffold113240:95428-97248(-)	MRGCLMAFSFESSRASFDEHEHARSPCANSASPPALTNSSSFSDSSDGNCIPSIFNAVESASTGSSASDSTRRLMHNRMLKRRGQEINNADEPGEVESAVCNGDEEQGVRIKEKRHRVYRGVRMRSWGKWVSEIREPKKKSRIWLGTFPTPEMAARAHDVAALSIKGKSAFLNFPQIASSLPRPATLSPKDIQAAAAVAAAEFHMPSEEDRNEDRSLDPVGMNNAIPSHTDSVIPAQSRNIEEAAAVSASNSIWVSSFLSENEWMTIYDDIVLDLPNIVGNMAEGLLVAPPWMLEQATAFSAKILLGKWSEKNCLRRCEPVFTR*	TTAGCGTGTAAACACAGGCTCACAGCGCCTTAAGCAATTTTTTTCCGACCATTTTCCCAGCAGTATTTTGGCTGAAAAAGCGGTAGCTTGTTCCAGCATCCATGGAGGGGCTACCAATAGACCCTCAGCCATGTTTCCCACAATATTGGGCAGATCCAACACTATATCGTCGTATATGGTCATCCACTCGTTCTCCGAAAGAAAACTCGAAACCCAAATCGAATTCGACGCGGAAACGGCTGCTGCTTCTTCGATATTCCTCGACTGTGCAGGGATCACAGAGTCTGTATGACTAGGGATCGCATTGTTCATCCCGACGGGGTCAAGGGATCGATCCTCATTACGATCTTCTTCTGAAGGCATGTGAAACTCAGCTGCAGCGACCGCGGCAGCGGCCTG…
PITA_26170	APFE031429541.1	C5033289:30243-30959(-)	MAWNSQSSVNGAKNYPADHISSTDPTLGGCFSEELNPFLLNENEYEYEDMVSYEVLKEAISHGWHPTPSSNTQIKGQSKTAERKEVQRSKPTKKLKAEVSGEKRYRGVRKRPWGKYAAEIRDSARHGVRVWLGTFETGEDAAMAYDQAAFAMRGSNAILNFPVEVVRRRSFERGPVLPASAVKFSCWSSETSSSTQLFDCNSRIQQLDETQPVLEFETLSVDYLEKLLVSSQGAAADF*	TCAGAAATCAGCAGCCGCTCCTTGCGAGGATACCAGAAGCTTCTCCAAGTAATCCACACTGAGAGTCTCGAACTCCAGTACTGGCTGCGTTTCATCGAGCTGCTGGATCCGGCTGTTGCAGTCGAAAAGCTGCGTACTGGAGCTGGTTTCAGAAGACCAGCAGGAGAATTTGACGGCGGATGCTGGAAGAACCGGGCCGCGCTCGAACGACCTGCGCCGAACGACTTCAACGGGAAAGTTAAGAATAGCGTTGGAGCCTCTCATGGCGAAGGCAGCTTGATCATAAGCCATGGCGGCGTCCTCGCCCGTTTCAAAAGTTCCCAACCAGACGCGGACTCCGTGCCTCGCGGAGTCCCTTATCTCCGCCGCGTATTTGCCCCACGGCCGCTTTCTCACTCC…
PITA_26369	APFE030648058.1	scaffold76004:67166-68742(+)	MCGGAIISDFVAASRSRRLSTRDLLPDFDKAAELFINGGAVSESSGKSGSLGEGYVVFDEGYKQKNKPSNNIFNSKEFSSGGESKAIPPVKDFEKPAAKNAGRKRMNLYRGIRQRPWGKWAAEIRDPRKGVRVWLGTFNTAEEAARAYDAEAKKIRGKKAKLNFTDGSCSVEMDSSKKMSRKKVKYCTKTPDLLQGFSMISNFKPSYSPKRDLLEGYCINGQMEPSLKDVCRSALQNYGYDDMEYGDSLFLKPRAPFQSNSNVSTVQSSEQSNLSQTLQKSYSCELCSHNYSEVSNFMSNACSDVANFDPVKSSHPVGHFHSDQSSISLDGAHFPWGHETKTPEITSEYDDTYESPFVAIKPPVNGVVKDRSVHTMDVSGGTQTFCVNSSMEVNDGTQR…	ATGTGTGGAGGTGCCATTATTTCGGATTTTGTTGCCGCCAGTCGATCTCGGCGGTTAAGTACCAGGGATTTATTGCCGGATTTTGATAAGGCCGCTGAATTGTTCATTAATGGCGGGGCAGTGTCGGAATCCTCCGGTAAATCCGGCAGCTTGGGCGAGGGTTACGTCGTCTTCGACGAGGGATACAAGCAGAAGAATAAACCCAGCAATAATATTTTCAACTCCAAGGAATTTTCTTCAGGTGGTGAAAGCAAGGCGATTCCTCCTGTGAAGGATTTCGAAAAGCCCGCGGCCAAGAACGCGGGAAGGAAGAGGATGAATTTGTACAGAGGCATCAGACAGCGTCCATGGGGAAAATGGGCTGCGGAGATTCGAGATCCCAGAAAGGGGGTTAGGGTT…
PITA_26441	APFE031706912.1	C4467869:10579-11166(+)	MCGPEANLISLNGSLRVTPRDFNTSSESFKPSNNIFHFNHEFSSGGENEAIPLKDFEQPVFLFGRNINSKVKPLYSPKHDSPLLSAENDENSSAKSSGRKRKTLYRGITQRRWGKWAAQIRDPRKGITVWLGTFNTAEEAAKAYDAEAKKIRGKKAKLNFPDD*	ATGTGTGGACCTGAAGCGAATCTCATTTCCCTCAACGGGTCTCTGCGTGTAACTCCCAGGGATTTCAATACGTCGTCGGAATCTTTCAAGCCCAGCAACAATATTTTCCACTTCAACCATGAATTTTCTTCAGGTGGTGAAAATGAGGCTATTCCTCTCAAGGATTTCGAACAGCCTGTTTTTTTATTTGGTCGGAATATAAACAGCAAAGTGAAACCTTTATATTCACCAAAGCATGACTCTCCTCTGCTAAGTGCTGAAAATGACGAAAATTCCTCGGCCAAAAGCAGCGGGAGGAAGAGGAAAACTTTGTACAGAGGTATCACGCAGCGTCGATGGGGAAAATGGGCTGCACAGATTCGAGATCCAAGAAAGGGCATTACGGTTTGGCTTGGAACG…
PITA_26485	APFE031477661.1	scaffold149830:97728-100243(-)	MENKPDRSEAGQKRWGTAQQTVTFTTHGVKENDITGQHITASSGQEGPSIITLPQQQQRNRENEMNFKRKELNPRNPPPKRHYRGVRQRPWGKWAAEIRDPKKAARVWLGTFETAEEAGRAYDDAALKFRGSKAKLNFPERFYLRNEDPPGMNMPKQESAAIADFGIQVEHATCSLSLPTNGDNFSAAPEGCHSLHVESISGETYSDRLHHGIPPRYFMPTDLLSLSHFSDVYHHGQPLQNIGFDSEQDNSNPSLVQQYSAYIRSQQEPEPFNQQFACMTAIQNEQALNYNPQLQITRRPNLVSSNYTGSRVSMFNNYVLQQQQQQHMLTRQQRVPSVSTTGCEELYNFRGRIINQTSDNFLDCTPSQSESYDNLDYNSGVLPARNLKGPEL*	TCAAAGTTCCGGGCCCTTCAAATTACGTGCAGGAAGAACTCCTGAATTGTAATCCAAATTATCGTAGGATTCAGATTGAGACGGAGTACAGTCTAGGAAGTTGTCAGATGTCTGATTAATGATTCTTCCACGAAAGTTATATAGCTCCTCGCAACCTGTCGTGCTAACTGATGGGACCCGCTGTTGACGAGTAAGCATATGTTGTTGCTGCTGCTGCTGCAGGACATAGTTATTGAACATGGATACCCTCGAACCTGTGTAATTAGATGAAACTAAATTAGGCCTCCTTGTAATTTGCAGCTGTGGATTATAATTCAGGGCTTGTTCGTTTTGTATGGCCGTCATACAAGCAAACTGCTGATTAAAAGGTTCTGGTTCCTGCTGAGATCTTATATAAGC…
PITA_26508	APFE031695276.1	C4379821:5475-6185(+)	CSLKEEDWLSVFTQNNDSEDHDLLMLLMGNNDSGHPQEILKQHPAPAEKREEEHRESAEGKRYSKHYRGVRRRPWGKFAAEIRDSRVRRWLGTFDTEKEAALAYDMAAFKMRGNRASLNFPVDVVTAALAQGEQGSRFCSPYDEKFRRRLNGKRFIETTEPKEQPPLKWRRHNLDTEQIEQRAGWDDGQICNDPASEVLELQDLGADYLEKLLLLSCSSSSPSSATAVHEEEFVCW*	TGTTCGCTAAAGGAGGAGGACTGGCTTTCAGTCTTCACGCAAAATAACGACTCAGAGGATCATGATCTGCTTATGTTATTGATGGGAAATAACGATTCAGGGCATCCGCAGGAAATCCTTAAGCAACACCCTGCGCCTGCGGAAAAGCGAGAAGAGGAACACAGAGAGTCGGCAGAGGGGAAACGTTACAGTAAACATTACAGAGGTGTCCGCCGCCGGCCATGGGGGAAATTCGCCGCCGAAATCAGGGATTCGAGGGTGAGGAGATGGCTGGGGACGTTCGATACGGAGAAAGAAGCCGCCTTGGCATATGACATGGCGGCTTTCAAAATGAGGGGCAACCGCGCCTCGTTGAATTTTCCGGTTGATGTCGTCACCGCAGCCTTAGCGCAGGGCGAA…
PITA_26547	APFE031173656.1	scaffold19770:208998-210159(+)	MAAACQEGQTEAASPDSPTKQIWSGTVDVVNIENADDRNDKVEQSESNERLVEKERKVKGSGETRHPVYRGVRKRRWGKWVSEIREPKKKSRIWLGSFSTPEMAARAHDVAALCLKGHSAFLNFPETVHHLPRPASNAARDIQEAAAAAAFVNPPITSPPPQTSLQSVDLQEKAEVIETDIKQSEDFSKVDLTEFLTNMAEGLLFAPAPYHMHDSQFFNSDEFNEDDSRAGSSLEHYMEQSDKICAQLCLLHEEL*	ATGGCTGCAGCGTGCCAAGAAGGGCAAACCGAGGCAGCAAGTCCAGATTCACCCACAAAACAAATTTGGAGCGGCACAGTTGATGTTGTTAATATAGAGAATGCAGATGATAGAAATGATAAAGTAGAGCAATCAGAATCGAATGAAAGGTTGGTGGAGAAAGAGAGAAAGGTTAAGGGAAGTGGAGAAACACGGCATCCGGTGTACAGAGGGGTGAGGAAACGTAGATGGGGAAAGTGGGTATCAGAAATAAGAGAACCCAAGAAGAAATCTCGCATCTGGCTCGGCTCCTTCTCCACCCCAGAAATGGCGGCTCGTGCACACGATGTGGCCGCTTTGTGTTTGAAAGGCCACTCGGCTTTTCTCAATTTCCCGGAAACTGTCCATCATCTTCCTCGC…
PITA_26603	APFE030385646.1	scaffold143941:87070-87771(-)	MEICSNTVDCNGRKRYRSEEETNSRKYRGVRRRRWGRWVSEIRQPGTKTRIWLGSYDKPEMAARAYDVAAVSLKGKSALPNFPHLTHTLPRPASLDPADIQYAAAQAALSFPQQKHPETDCPCPYPCPLKCPNLHSSATPSNVGGSMKVAAADDGGFEASSVNLRRIRTGRECYSLFDEGLEQFDSPNLVMNMAEALLLTPPRLNDLEAADYEYDDEEWMDQPVGFGFLWSNL*	TCAAAGATTGCTCCAAAGAAATCCGAAACCAACAGGTTGATCCATCCACTCCTCATCATCATATTCATAATCTGCAGCTTCCAGGTCGTTGAGACGAGGGGGTGTGAGAAGCAGAGCTTCTGCCATATTCATTACTAAATTTGGCGAATCGAATTGCTCGAGCCCTTCATCAAACAAGGAATAACACTCACGGCCCGTCCTGATTCGTCGTAAATTGACTGACGAAGCCTCGAACCCTCCATCATCAGCTGCCGCAACTTTCATTGATCCACCAACGTTGCTGGGTGTTGCAGAAGAATGAAGATTAGGGCATTTCAAGGGGCACGGGTACGGGCAGGGGCAGTCAGTTTCAGGGTGTTTTTGTTGAGGGAATGAAAGAGCCGCTTGGGCAGCGGCGTA…
PITA_26612	APFE031162777.1	scaffold183526:258610-259234(-)	MCELEANLISLNGSLRVTPRDFNTLFINGGAVSESFKPSNNIFHFNHEFSSGGENEAIPLKDFEQPIFLFGRNINSKVKPLYSPKHDLSEGYSPLLSVENDENSSAKSSGRKRKALYRGLTQRPSGKWAAKIRDPRKGITVWLGTFNMAEEATKAYDVEAKKIRGKKAKLNFPND*	TTAGTCGTTAGGAAAGTTCAGCTTCGCTTTCTTTCCTCTAATCTTTTTAGCCTCCACATCATACGCCTTGGTGGCTTCCTCTGCCATATTAAACGTTCCAAGCCAAACCGTGATACCCTTTCTTGGATCTCGAATCTTTGCAGCCCATTTTCCCGATGGACGCTGCGTGAGACCTCTGTACAAAGCTTTCCTCTTCCTCCCACTGCTTTTGGCCGAGGAATTTTCGTCATTTTCAACACTTAGCAGAGGAGAGTAACCCTCAGATAAGTCATGCTTTGGCGAATATAAAGGTTTTACTTTGCTGTTTATATTCCGACCAAATAAAAAAATAGGTTGTTCGAAATCCTTGAGAGGAATCGCCTCATTTTCACCACCTGAAGAAAATTCATGGTTGAAGTG…
PITA_26666	APFE030134713.1	scaffold140608:32829-33452(+)	MCGPEANLISLNGSLRVTPRDFNTSFINGGAVSESFKPSNNIFHFNHEFSSGAENEAIPLKDFEQPVFLFGRNINSKVKPLYSSKHDLSEGYSPLLSAENDENSSAKSSGRKRKTLYRGISQRPSGKWAAKIRDPGKGITVWLGTFNTAEEAAKAYDAEAKKIRGKKAKLNFPDD*	ATGTGTGGACCTGAAGCGAATCTCATTTCCCTCAACGGGTCTCTGCGTGTAACTCCCAGGGATTTCAATACGTCGTTTATCAATGGTGGAGCTGTGTCGGAATCTTTCAAGCCCAGCAACAATATTTTCCACTTCAACCATGAATTTTCTTCAGGTGCTGAAAATGAGGCGATTCCTCTCAAGGATTTCGAACAGCCTGTTTTTTTATTTGGTCGGAATATAAACAGCAAAGTAAAACCTTTATATTCATCAAAGCATGACTTATCTGAGGGTTACTCTCCTCTGCTAAGTGCTGAAAATGACGAAAATTCCTCGGCCAAAAGCAGCGGGAGGAAGAGGAAAACTTTGTACAGAGGTATCTCGCAGCGTCCATCGGGAAAATGGGCTGCAAAGATTCGA…
PITA_26836	APFE031205709.1	scaffold115594:101047-132392(-)	MRGLEEGVTMDIEVHVALSYSKQSHAADIHSHNSRSYHHLCDSCLQIPSLLPPSRDFKLYRHVLSATPLQNLAITKPSQNQSSLKSRPFKGIRQRKWGKWVSEVRIPNSSGRIGLGSYDTREKAARAYDFAVYCLRGSKANLNFPHSPPKISGASFLSPQQIPTAAAKLAAEELRLPSENGAASSSYVSEEECDINSEQIIWEEGATFGDSVAFESMENGGSFNVQDIPPLGVLMEDFAIPIPFQLPEDWELGIF*	TTAGAAAATTCCCAGCTCCCAGTCTTCTGGCAGCTGGAACGGAATCGGAATCGCAAAATCTTCCATCAACACCCCCAGCGGAGGAATATCCTGTACGTTGAAAGATCCGCCATTCTCCATACTTTCAAATGCTACTGAATCTCCAAATGTCGCACCCTCCTCCCAAATAATCTGTTCACTGTTAATATCACATTCCTCTTCCGAAACGTACGATGAGGATGCCGCGCCATTTTCAGAAGGAAGTCGTAATTCTTCTGCGGCTAATTTGGCCGCCGCGGTTGGAATTTGCTGCGGTGATAGAAACGAAGCGCCGGAAATTTTCGGCGGAGAGTGGGGAAAATTGAGGTTGGCCTTGGATCCTCTGAGACAATAAACGGCAAAGTCATATGCACGGGCAGC…
PITA_27078	APFE030855459.1	scaffold188914:51846-52802(+)	MVLSFEPESSPCCGLNDQQGRSRCADCGPLVSINSCICPDLSEGNCIYHSAMIDAASSTSTGSSGSDSALALMQSRSRKRRAAEINNADDSGEEESAVCNGDKQGGRGKGNRHPVYRGVRMRTWGKWVSEIREPKKKSRIWLGTFPTPEMAARAHDVAALSIKGKSAFLNFPNLAASLPRPATLSPKDIQAAAAAAATEFQIPKDLSEDRSLDLAEMSSESPVHGDALVPAESRNNEQAVATDCAPSNLAWVSSFLSENESMIIDDDILFDLPNFLCNMAEGLLVAPPWLLEQEDLYGSNYYAADNVYEGNGAMSLWN*	ATGGTACTCTCGTTTGAACCAGAGTCGAGTCCCTGTTGCGGATTGAATGATCAGCAGGGCCGTAGTCGTTGTGCAGATTGTGGTCCTCTGGTTTCTATAAATTCGTGTATATGTCCTGATCTATCAGAGGGGAACTGTATATATCACTCTGCCATGATTGATGCAGCTTCATCTACTTCCACCGGAAGCTCCGGCTCGGATTCTGCGCTCGCGTTAATGCAGAGTAGGTCACGTAAGCGCCGTGCTGCGGAGATTAATAATGCAGACGATTCTGGCGAAGAGGAATCTGCTGTTTGTAATGGAGATAAACAGGGGGGACGAGGTAAAGGAAACCGGCACCCTGTTTACAGAGGCGTGAGAATGAGGACTTGGGGGAAATGGGTTTCAGAGATTCGAGAG…
PITA_27304	APFE031586076.1	scaffold54762:198682-202935(-)	MKPVLTNGEKDLSEANSLFCSVNHSEDTLAMISALTHVVCGHILHPMEGSTPNLIAGKKRCRDEEQTISSTMNCAKPDDISGQHLTFSPEESSTVTHLQHQQSIREDDLRLKLKDEIRQPQNPPKKKRYRGVRQRPWGKWAAEIRDPRKAARVWLGTFDTAEGAARAYDDAALKFRGVRAKLNFPERVNLRDEDNPGVNIGKEENATITDFSVPVAPATYYPSAPTYGDNLSAPAPPAHCHTVHHGHASEHFVTADSTCLSEVSDVYLYAQLLQSQNFDAHQGNSHATLLQQYLAYMKDQQETEVYNQELPYITPIQNQPGLDYIPQLQITGRPNLASWNYAGSGLPTYNNYVQQQQQQHLFVHQQPPSISITAYEGLYDMDEKFIDQTSGNLLPTSQS…	TCAAAGATCGGGGCAGTGCCAATTATGTGCAGGAAGAACTACTGAATTGTAGTCCGGATTATCGTAGGATTTGGATTGCGACTGAGAAGTGGGCAGCAGGTTCCCAGATGTCTGATCAATAAACTTCTCATCCATGTCATACAACCCTTCATAAGCTGTGATGCTAATTGATGGTGGCTGTTGGTGAACAAACAGGTGCTGTTGTTGCTGCTGCTGCACATAATTATTGTACGTAGGTAACCCCGAACCTGCATAGTTCCATGAAGCTAAATTGGGCCTCCCTGTAATTTGCAGTTGTGGAATATAATCCAATCCTGGCTGATTTTGGATTGGCGTGATATAAGGAAGCTCTTGGTTATAAACTTCTGTTTCCTGCTGATCTTTCATATATGCTAAATA…
PITA_27461	APFE031404995.1	C4711025:5498-6025(+)	MAKPSQYQNHHNGRQKRSLKSRQFKGIRMRKWGKWVSEIRMPHSTRRIWLGSYDTPERAARAYDFAAYCLRGSKAKLNFPLSPPEIPCASALSPPQIQATAAKFATEELQLSSEAAFSSSASTAEHCNERQEIWAEKSPAFWDWVLLECLESGKSPNLDEFPPLDESMEYFGVKL*	ATGGCTAAACCCTCGCAATACCAGAACCACCACAACGGACGCCAAAAGCGCTCACTCAAGTCGCGGCAGTTCAAGGGAATTCGAATGAGAAAATGGGGGAAATGGGTGTCGGAAATTCGAATGCCCCATTCTACTCGCAGAATTTGGCTGGGCTCCTACGACACCCCTGAAAGGGCTGCCCGCGCCTACGATTTTGCCGCGTATTGCCTGAGAGGATCGAAAGCGAAGCTCAATTTCCCCCTTTCCCCGCCGGAAATCCCCTGCGCCTCTGCTCTTTCGCCGCCTCAAATTCAAGCCACTGCCGCCAAATTCGCCACAGAGGAATTGCAGCTGTCTTCTGAAGCAGCGTTTTCATCTTCTGCTTCCACAGCGGAACACTGCAATGAGCGCCAAGAGATT…
PITA_27654	APFE031246607.1	scaffold175724:24703-25290(-)	MCGPEANLISLNGSLRVTPRDFNTSSESFKPSNNIFHFNHEFSSGGENEAIPLKDFEQPVFLFGRNINSKVKPLYSPKHDSPLLSAENDENSSAKSSGRKRKTLYRGISQRRWGKWSAQIRDPRKGITVWLGTFNTAEEAAKAYDAEAKKIRGKKAKLNFPDD*	TTAGTCGTCAGGAAAGTTCAGCTTCGCTTTCTTTCCTCTGATCTTTTTAGCCTCTGCATCATACGCCTTGGCGGCTTCCTCTGCCGTATTAAACGTTCCAAGCCAAACCGTAATGCCCTTTCTTGGATCTCGAATCTGTGCAGACCATTTTCCCCATCGACGCTGCGAGATACCTCTGTACAAAGTTTTCCTCTTCCTCCCGCTGCTTTTGGCCGAGGAATTTTCGTCATTTTCAGCACTTAGCAGAGGAGAGTCATGCTTTGGTGAATATAAAGGTTTCACTTTGCTGTTTATATTCCGACCAAATAAAAAAACAGGCTGTTCGAAATCCTTGAGAGGAATAGCCTCATTTTCACCACCTGAAGAAAATTCATGGTTGAAGTGGAAAATATTGTTGCT…
PITA_27765	APFE031281924.1	C4960473:19242-20802(-)	MEEMSDLECLFHEVEMPSLECLFHEVEEQEVQPIIDEMSALECLFREVEEQEVQQHLGYSNLSTMAVSESWLHHPTRYPVQEKIQTGGFRTEALISRTEALISTGACNGSVSGHVVDRNPEKLDTTLGFGGGIGAAQGSLISDSGVPTYENQQVPALSPEAMVSDGYKSKGDKQKISIDRATAQSSKHYRGVRMRAWGKWVAEISNPITRAKVWLGTFDTAEDAARAYDEAAYRFRGLKANLNFPNELCHSNGNQSKGAKLKISIDRATAKSSKPYRGVRMRAWGKWVAETINPITKAKVSLGTFDTAEDAARAYDEAAYRFRGLKAQLNFPNDLRRSNGNAHRPRRRTRAKESQRFGSAKHSNPITDPSFPPSLISQHFPGFHFYVRLLQNPRLSSLP…	TTAGACGTTCGTTGGTTGAGACGTTTGTAAGTATCCAGGAACGTTAGAATATAGTGACTGCGAGGAGGGCTCGGTGGGAATAGGATGCTGCAAGGCCGACGCAGACACCCAATGAACGCTTGCTGGTGGCCCAGTAGGAACAACATTAGCAGTGGGGTGTGGCAATATGGGGTCACAGAGCAACATTGCCAGATACTGCTCCCTAAGAGGGAGTGAAGACAGACGTGGATTCTGCAGCAGCCGAACGTAGAAATGAAATCCTGGAAAGTGTTGCGAGATTAGGCTTGGAGGAAACGACGGGTCCGTGATCGGATTTGAATGCTTTGCTGAACCAAAACGTTGTGATTCCTTTGCACGAGTGCGGCGGCGAGGGCGGTGAGCATTTCCATTGCTGCGGCG…
PITA_27874	APFE030037527.1	scaffold107309:169345-170764(-)	MDHSLFAALSARVFAASSPGESSLMAPTDTNGDHNGKSANDANVNATSEEVHYRGVRKRSGRYAAEIRDPTIQKRRWLGTFNTNEEAAKAYDKAARRLKGDRAKTNFPIPDSVQNKGHTTTAVGVQNQRSSSKPNSDSSCISVLRFGDKELRDSSL*	TCACAAAGAAGAATCTCGTAATTCTTTATCTCCAAAACGTAAAACACTAATGCAGGAAGAATCTGAATTGGGCTTGGAACTGCTCCTCTGGTTCTGGACGCCGACAGCGGTGGTAGTGTGGCCCTTGTTCTGGACGCTGTCGGGGATGGGGAAGTTGGTCTTGGCTCTATCCCCTTTTAAACGCCTTGCGGCCTTATCATACGCCTTCGCCGCTTCCTCGTTCGTATTGAAGGTGCCAAGCCACCTTCGCTTCTGGATGGTTGGATCTCTGATCTCTGCAGCATATCTACCCGACCTTTTTCTCACTCCTCTGTAATGCACTTCTTCACTCGTTGCATTGACATTCGCGTCGTTGGCACTCTTGCCATTGTGATCTCCATTCGTATCAGTGGGAGCCAT…
PITA_28016	APFE031355785.1	C3879399:1534-2377(-)	MRTNGVATREDAGCNGKWEVLNPYRNVSRKYGVAGCNALTTKTLMDVAVGASNSINMEMWNMLELIRHHLLEVEDDIDNEGTSPLIRRAEVFKVKPQPSEQENGEMKQISYRHYIGVRRRPWGKFAAEIRDPVKKGARVWLGTFNTGKEAALAYDRAAYRLRGAKALLNFPLDLASNSESGLAVGHMAHKRKRGNSSSGSGMDIELEEPSSNFS*	TCAGCTAAAATTGCTGGACGGTTCCTCCAATTCGATGTCCATGCCGCTCCCACTGCTACTGTTTCCTCTCTTCCTCTTGTGTGCCATGTGACCTACGGCCAACCCGCTCTCTGAATTGGAAGCGAGGTCGAGGGGGAAGTTCAGCAGAGCCTTGGCACCACGAAGTCTGTAGGCAGCCCGGTCATATGCGAGAGCGGCCTCTTTGCCAGTGTTGAAAGTGCCCAGCCAAACTCGAGCGCCCTTCTTGACGGGATCTCTGATTTCCGCTGCGAATTTTCCCCATGGCCGCCGCCTCACTCCTATGTAGTGCCTGTAACTGATCTGCTTCATCTCCCCATTCTCCTGCTCGCTTGGCTGTGGCTTCACCTTAAACACCTCTGCTCTTCTTATCAAGGGTGA…
PITA_28041	APFE031530569.1	C4442067:5954-8653(+)	MRSWGRWVSEILEPKKKSRMWLGTFPTPEMAARAHDVAALSIKGKSAFLNFPHMASSLPRPATLYPKVIQAATALAAAEFHMPSEEDSEDRSLDPMGTSNAIPSDSHTVIPAKSGNNEAAAAVCASNFVSIFLLGNEWMSGCDASILLNGTSSDPSEQQATPNLTLRAAAFEIINKIKEAVEAKCSGVVSCADILALTASYAVSMGGGPEFLVPLGRRDSLTFANQTVTLASLPSPTSNVTVLMTIFTEKGFHNFTELVALSGAHTFGISHCSSFVNRLYPTQDTTLNAAFARELEHTCPTNTTVNTTNLDIRTPNVFDIKYYIDLQNGEALLTSDQDLYNDSRTRQIVNGFALNQTSFFKQFALSMPKMVQLDVLTGAEGEIRKNCAVRNTNTSSYSI…	ATGAGAAGTTGGGGCAGATGGGTTTCAGAGATTCTAGAGCCCAAGAAGAAGTCCAGAATGTGGCTGGGGACGTTCCCCACACCAGAGATGGCGGCTCGAGCCCACGACGTGGCGGCGCTCAGCATCAAGGGAAAATCCGCGTTCCTCAATTTTCCCCACATGGCCTCGTCGTTGCCTCGCCCCGCCACATTGTACCCCAAAGTCATCCAGGCCGCTACCGCGCTCGCTGCGGCTGAGTTTCATATGCCTTCAGAAGAAGATAGTGAGGATCGATCCCTTGATCCCATGGGGACGAGCAATGCGATCCCTAGTGATTCCCACACTGTGATCCCTGCAAAGTCGGGGAATAATGAAGCAGCAGCAGCAGTTTGCGCGTCGAATTTTGTTTCGATTTTTCTT…
PITA_28146	APFE031480404.1	C4402509:2710-3342(-)	MLLCILIPQHNAFSLELRISDRQLPSSTAPNCDSMFPSHYTALALRRQMWRNPGESGQNHSQPPEEDKGKTLRQFKGIRMRKWGKWVSEIRMPRSKERIWLGSYKTAEQAARAYDAALYCLRGPNAKFNFPNSVPAIPPESSLSHQQIQDAAAKYALNEIPLNFSSPDNMNKKNKWKEKPPSPSRWSLALETEWACDSGFQKLQSIDSEK*	TTATTTCTCTGAGTCAATAGACTGTAATTTCTGAAACCCACTGTCGCACGCCCACTCCGTTTCTAAAGCCAGAGACCATCGTGATGGCGATGGCGGTTTCTCCTTCCACTTATTCTTCTTATTCATATTGTCCGGAGAGGAAAAATTCAAAGGGATTTCGTTCAAGGCATATTTGGCGGCAGCATCCTGAATTTGCTGATGAGAAAGAGAAGACTCAGGCGGAATGGCGGGCACGGAATTGGGGAAATTGAATTTGGCGTTTGGGCCTCTGAGGCAATAGAGTGCGGCATCGTAAGCACGGGCGGCTTGCTCGGCAGTTTTATAGGATCCTAGCCAGATCCTCTCCTTCGATCTCGGCATCCGAATTTCGGACACCCACTTTCCCCATTTTCGCATTCG…
PITA_28269	APFE030262187.1	C4833137:10985-21383(-)	MAPTDRNRSNPVVDEDVKDAKEVKYRGVRKRPWGKYGAEIRDPSIKKRRWLGTFDTAEEAARAYDNAARNIKGVKAKTNLPTFVFWLLQEIYELERCRRLIRQFRHRSARSTSRYHLTPFVTGNPLMAPTDRNRSNPVVDEDVKDAKEVKYRGVRKRPWGKYGAEIRDPSIKRRRWLGTFDTAEEAARAYDNVARNIKGVKAKTNFPAPYLPLNNVDIQGCSPAATTSLPPSPPANHANNKNGCSAHISEQITPWTHFYMNDGLERQRVNKHSMSTPWSTGRIGISNIIPTNLVDFAILLQQQQQPQPMVMPLCGKIVGTHMINKPNGNEWVGAGATKNKLPTTSSETTTCDLYSSSVVLDSQLSLDDPVIQKKVTPKSFDLNFPPPGDEDDEDEH*	TCAATGCTCATCTTCGTCGTCTTCGTCCCCTGGAGGTGGAAAATTCAAATCAAATGATTTCGGAGTCACTTTTTTCTGTATAACAGGATCATCTAGGGAGAGTTGACTGTCCAATACTACTGAGGAGGAATATAAATCACAAGTAGTAGTCTCTGAGCTGGTTGTAGGAAGTTTATTCTTGGTTGCACCTGCTCCTACCCACTCATTGCCATTGGGTTTATTTATCATGTGAGTCCCCACAATTTTACCGCACAAGGGCATCACCATCGGCTGCGGCTGTTGCTGCTGCTGCAGAAGGATAGCGAAGTCTACAAGATTGGTGGGAATGATATTGGAAATACCAATACGTCCAGTACTCCATGGAGTACTCATGCTGTGTTTGTTCACTCTTTGCCTTTC…
PITA_28422	APFE031238581.1	C5038975:25024-26365(-)	MRRTRGGIGRTTKAHSVRLARSFGRVERIGTQLGRAVIVQHRKAAACSEVRLSRSATAGFGNTTGLITGSGEPNGVYTWSIISVCIVRGVRKRPWGKYGAVIRDPSIKRRRWLGTFDTAEEAARAYDNAAGTLKGVKAKTNFPAASLPLDTVDIQRCTPAATSAPLPSPPAKHDNNKNELSINISEQIKPGTHVYMNDGLETQRVKEHSMSPWSIPNIIPTNLIDFSILLQQQPPPMVMPLWGKIVAPDNEWVEASLQTGTRDLYSSSLVLDNQLSPNDPPTKETATPKSFDLNFPAPGEEHDEDEQ*	TTATTGTTCATCTTCATCATGTTCTTCTCCTGGAGCTGGAAAATTCAAATCAAATGACTTGGGAGTGGCTGTTTCCTTTGTAGGAGGATCATTAGGGGAGAGTTGATTGTCCAATACTAGTGAAGAGGAATACAAATCACGAGTACCAGTCTGTAGGCTGGCTTCGACCCACTCATTGTCAGGCGCCACAATTTTTCCCCACAAGGGCATCACCATTGGTGGCGGTTGTTGTTGCAGAAGGATAGAGAAGTCTATGAGATTGGTGGGAATAATATTGGGAATACTCCATGGACTCATGCTGTGTTCCTTCACTCTTTGCGTTTCCAATCCGTCATTCATATAAACGTGCGTCCCGGGCTTTATTTGTTCAGAGATATTGATAGACAACTCATTCTTGTT…
PITA_28617	APFE031706912.1	C4975705:32948-33535(-)	MCGPEANLISLNGSLRVTPRDFNTSSESFKPSNNIFHFNHEFSSGGENEAIPLKDFEQPVFLFGRNINSKVKPLYSPKHDSPLLSAENDENSSAKSSGRKRKTLYRGITQRRWGKWAAQIRDPRKGITVWLGTFNTAEEAAKAYDAEAKKIRGKKAKLNFPDD*	TTAGTCGTCAGGAAAGTTCAGCTTCGCTTTCTTTCCTCTGATCTTTTTAGCCTCTGCATCATACGCCTTGGCGGCTTCCTCTGCCGTATTAAACGTTCCAAGCCAAACCGTAATGCCCTTTCTTGGATCTCGAATCTGTGCAGCCCATTTTCCCCATCGACGCTGCGTGATACCTCTGTACAAAGTTTTCCTCTTCCTCCCGCTGCTTTTGGCCGAGGAATTTTCGTCATTTTCAGCACTTAGCAGAGGAGAGTCATGCTTTGGTGAATATAAAGGTTTCACTTTGCTGTTTATATTCCGACCAAATAAAAAAACAGGCTGTTCGAAATCCTTGAGAGGAATAGCCTCATTTTCACCACCTGAAGAAAATTCATGGTTGAAGTGGAAAATATTGTTGCT…
PITA_28685	APFE031534365.1	scaffold194575:24199-24856(+)	MASLVMDKASREHLSPSPSGEDRGQSCRRQFKGIRMRKWGSWVSEIRIPKTREKIWLGSYKTAEQAARAYDAGIYCVRGPNAKFNFPNSVPAIPSASSLSRQQIQVAAAKYALDEIPSILPSLQNITNIKTKISKAQDLGLWETPFDDNGGLNLDKIPSIEEALVWEFIPSWEEEQQAEYVFFDPTDLWNFGDI*	ATGGCGTCGTTAGTTATGGATAAAGCCTCCCGAGAGCACCTTTCGCCGTCTCCATCAGGCGAAGATCGCGGACAAAGTTGCCGCCGCCAATTTAAGGGAATCCGAATGCGAAAATGGGGGAGTTGGGTGTCTGAAATCCGGATACCCAAGACCAGAGAGAAGATATGGCTGGGGTCATACAAAACCGCCGAGCAGGCTGCCCGTGCTTACGACGCCGGAATATATTGCGTGAGAGGCCCCAACGCCAAATTCAACTTCCCCAATTCCGTGCCCGCCATTCCGTCCGCGTCTTCACTTTCCCGTCAGCAAATTCAGGTTGCTGCGGCCAAATATGCGTTGGATGAAATCCCTTCAATTTTGCCCTCTCTGCAGAATATCACAAATATTAAGACCAAGATC…
PITA_28692	APFE030328060.1	scaffold14337:23572-24176(+)	MCGGEPTFISLNQSRLVTLRDLDTIVDLSMNGGASMTCLEPFNKSGNFDDEYKQKLEPNKNIFNCKHEVSSSAENEAIPPLKDFMIPPLKDFEMSSSKTTRRKRTNLYKGIRQRQRGKWVAKIQDTRKGTMVWLGMFNMSEEATKACDVEAKKIRGKTAQSLVFYKSGH*	ATGTGTGGAGGTGAACCAACTTTCATTTCTCTCAACCAATCTAGGCTTGTAACTCTGCGGGATTTGGATACAATTGTTGACTTGTCCATGAATGGTGGAGCTTCAATGACTTGTTTGGAACCCTTCAATAAATCAGGCAACTTCGATGATGAATATAAGCAAAAACTTGAGCCCAACAAGAATATTTTCAACTGCAAGCATGAAGTTTCTTCGAGTGCTGAAAATGAGGCAATTCCCCCTTTGAAGGATTTCATGATTCCTCCTCTGAAGGATTTTGAGATGTCCTCAAGCAAAACCACCAGAAGGAAGAGGACAAATTTGTACAAAGGTATTAGGCAGCGTCAAAGGGGAAAATGGGTTGCGAAGATTCAAGATACAAGAAAGGGCACTATGGTTTGG…
PITA_29504	APFE030087552.1	scaffold183856:131682-132338(+)	MVLYGILKEAANKGWVPRTPKEQPVTEIKKEGAFPVKLEADIRQETRATPPPKNVKKNAGRHYRGVRQRPWGKFAAEIRDSARKGARVWLGTFSTAEEAALAYDRAAYKMRGSRALLNFPLQVGAEDVNTSDNTSSLEKEESSGENNLNRKRQHEEMMRGSEEQWDRQCRMRLEDRKKMGSGMAEEMLSGKMATPPLTPRAIEMSFTGFLCTGQLMVN*	ATGGTTTTGTACGGGATTCTCAAGGAGGCCGCCAACAAGGGATGGGTGCCCCGAACACCCAAAGAACAGCCGGTGACGGAGATCAAGAAAGAAGGGGCTTTTCCCGTCAAACTAGAGGCAGATATCCGTCAAGAAACGAGAGCCACGCCCCCGCCGAAAAATGTAAAGAAGAATGCGGGGAGGCATTACAGGGGTGTGAGGCAGCGGCCTTGGGGAAAATTTGCGGCGGAGATAAGGGACTCTGCGCGTAAGGGCGCTAGAGTTTGGCTTGGCACCTTCAGTACGGCCGAGGAGGCTGCGCTTGCATATGACCGTGCCGCTTACAAGATGCGGGGCTCTAGGGCTCTGCTTAATTTCCCCCTCCAAGTTGGCGCAGAGGATGTTAATACATCTGATAAT…
PITA_29833	APFE030732624.1	scaffold82905:10767-12331(+)	MCGGAIIADFIPANRSRRIAPRDLWPDFDTFADLFINGGAVSESFNKAGSFDEAYKQKIKPSNKFFNYKHEFPSGGKNEAIPTMKDFEIPPLKDFEKSSAKSSGRKRRNLYRGIRQRPWGKWVAEIRDTRKGIRVWLGTFNTAEDAANAYDAEAQKIRGKKAKLNFADGSCSVKMDSRKKMSGKKAKSCTKHPDLLLDLNIKSKVKFPYSPKPDLLEDCDLPMEPSSKDVRRSDLPIYGYDDMDYGDSQFINPPPFRSNSNPSGFQSSEHSHVIQTLQKSCFCETCSHNYSEVSNFMLPAYGDTAKFEPVESSYPGAYFDSDPSSNSFDGARYPWGHQTKTPEMSSVCDDGDESVFVDIKPPVHGVVKDRSANTSIEVNGGTESFAVETFREINAGTEC…	ATGTGTGGAGGTGCCATTATTGCGGATTTTATTCCCGCCAACCGATCCCGGCGTATAGCTCCCAGGGATTTATGGCCCGATTTCGATACCTTCGCTGACTTGTTCATTAATGGCGGAGCAGTGTCGGAATCCTTCAATAAAGCGGGCAGCTTCGACGAGGCATACAAGCAGAAGATTAAGCCCAGCAACAAGTTTTTCAACTACAAGCATGAATTTCCTTCAGGCGGTAAGAATGAGGCGATTCCTACTATGAAGGATTTCGAGATTCCTCCTTTGAAGGATTTCGAAAAGTCCTCAGCCAAGAGCTCGGGGAGGAAGAGGAGGAATTTGTACAGAGGTATCAGGCAGCGTCCATGGGGAAAATGGGTCGCTGAGATTCGAGATACCAGAAAGGGCATT…
PITA_29961	APFE031706912.1	C3864065:1474-2061(+)	MCGPEANLISLNGSLRVTPRDFNTSSESFKPSNNIFHFNHEFSSGGENEAIPLKDFEQPVFLFGRNINSKVKPLYSPKHDSPLLSAENDENSSAKSSGRKRKTLYRGITQRRWGKWAAQIRDPRKGITVWLGTFNTAEEAAKAYDAEAKKIRGKKAKLNFPDD*	ATGTGTGGACCTGAAGCGAATCTCATTTCCCTCAACGGGTCTCTGCGTGTAACTCCCAGGGATTTCAATACGTCGTCGGAATCTTTCAAGCCCAGCAACAATATTTTCCACTTCAACCATGAATTTTCTTCAGGTGGTGAAAATGAGGCTATTCCTCTCAAGGATTTCGAACAGCCTGTTTTTTTATTTGGTCGGAATATAAACAGCAAAGTGAAACCTTTATATTCACCAAAGCATGACTCTCCTCTGCTAAGTGCTGAAAATGACGAAAATTCCTCGGCCAAAAGCAGCGGGAGGAAGAGGAAAACTTTGTACAGAGGTATCACGCAGCGTCGATGGGGAAAATGGGCTGCACAGATTCGAGATCCAAGAAAGGGCATTACGGTTTGGCTTGGAACG…
PITA_30026	APFE031063846.1	scaffold141845:88598-90022(-)	MPGPQIFPQSLCTSTALKTSKKVRGQNKVNKQYDPDNERVQHHLAILTRTVRVICTDPDATDSSSDEEAVRLEPKRVVREIYIPADCSPSVSDSEDEYQLPICSSLPFSQIEEECKDVWQEFYDPREKKPKKKTKGKKVSRKQRTMLKAFERVKTGRVSKSSPALRSFADKTSKYKGVRQRRWGKWAAEIRDPSKGVRLWLGTYDTAEEAAQAYDKAARKINGPSAPTNFSSSCTSCISERNPPRAAKKQIYDRQWVAAHSVMTRSSANAKLKPITVESNMTSSSASLSCISEEGSEQGSDEDWIPVSSPAPAATVSTSYSLIDDVGSEDASCSLMIEHSTSCSISSDFLADCLEDNAHQGSHNEFLPKLDNSNLLLDDTLDLIEQLNTENEGNALVDF…	CTAAATGTTGAGATTCATCCAAGACATGGCTTCGGCATCAAGATCAAAATTTAGGTTAGACATGGCATTATCTCCATCTAGTAGATCAAGGGAGTCTGGCAAGGAGACTAAATCTTTTGGATCACTGTCGCCCATGTCAAAAACTTGTCCAAACTCCTCCAGAAAATATGATTCGGGGTAGGTTAATTCAAGCTCATTGCAGCAATGTTCACTGATAGGAGGTATGAGGAAATCCACGAGAGCATTGCCTTCATTTTCTGTATTAAGCTGTTCAATGAGATCAAGTGTGTCATCCAATAAGAGATTGGAATTATCCAATTTAGGCAAAAACTCGTTATGAGAACCTTGATGGGCATTATCCTCCAAACAATCTGCTAGGAAATCGGAGGAGATACTGCA…
PITA_30174	APFE031714146.1	scaffold84626:190937-192761(-)	MTLAQRTRKSLALLWLVQVMAAPCDLLKAVGRTNCPITPDVALGLGQCVLTAEVDSSSDSSKPNYYFPKAMGADSTRTDYEDAKAVTEEDSSSSPAAASFLLPNRAGLEEMGNGINVVCSQNIRNPSAQRKLPSSQYKGVVAQPNGRWGVQIYEKHRRVWLGTFNSEEDAARAYDRAAIKLRGAEAITNFNFADRHPGALFLRGHSNSEIVDTTYEEELDNDDTTSFSVYPDIAWSTTTEPREHLFDKAVTPSDVGKLNRLVIPKQYAEKYLPLDKASIHDKGKGVLLNFEDSSTEKIWRFRYSYWNSSQSYVLNKGWNRFVKEKRLQAGDIVTFERTSRSHRLFITFRHRPRYLLPPTALPPPLARCQLAINPFAAKDYPHSEQLFYAPPTADVQNSA…	TCATGCCCGGGCAAAAGTTAATGGGGTCGGCTGCAGATTTACTCCAAACAGCCAGACTGAAGAAGAATCACAATTACCGTCGGTGGACGGAGACGACCTTTGGTGATCTACGAAATCTAGGGACGAGGGTTTCCCGTCATCTGACACAGACTTCGGGGTCAATAATAAGTCCACAGAAATAGGGCTGGGGACACAAGGAATCAAACGGTGAAAGGCTGAATTTTGGACATCCGCCGTCGGCGGTGCGTAAAAGAGCTGCTCGCTGTGCGGGTAATCTTTCGCAGCGAAGGGATTGATAGCCAGCTGGCAGCGTGCGAGTGGCGGCGGTAGGGCAGTGGGAGGGAGGAGATAGCGGGGCCGGTGGCGGAAGGTGATGAAAAGGCGGTGCGACCGGGAGGT…
PITA_30567	APFE031496118.1	C4886155:34187-35716(-)	MPQSDLDSAACDNDGGSYIEPTNTEEQSNTMAVVDSGGRSLIPQASHTEGCTSVVGDPNANSMGERLRKYRGVKRSNRKWTAQASNRKNDPEKSKKSVHLGTFPTAEMAAVAYDAAVLVLRGESRANRLNFPEYSPHIKSIVEGFSPSDIANNMKYVAWKAAKNIAHLLSLENKDSQQAKDEGFEVSAAMPAAAISSSSASLMSSNIGMPHSVHTADFPVLRPAGVKQRIKVVARAAGRARQERRKIYDDKQDSGISCFSVMQEAEHECSTPVGIAKNNVYNEKIHPGQSSSNTLGCPADSGISNFSFAYDQLHESTVHEPKFPISNPNSMPKRVQSFDELIDIAKDPYMH*	CTAGTGCATGTAAGGGTCCTTCGCTATGTCGATTAACTCATCGAAACTCTGCACTCTTTTGGGCATAGAATTTGGATTTGAGATTGGAAATTTAGGCTCATGTACAGTGGACTCATGGAGCTGGTCATACGCGAATGAGAAATTGGAAATGCCACTATCTGCTGGGCAGCCTAACGTATTACTGCTTGATTGTCCAGGGTGGATCTTCTCATTATACACATTATTTTTTGCAATGCCCACCGGAGTACTGCACTCGTGTTCAGCCTCCTGCATGACCGAGAAACAGCTGATACCGCTATCTTGTTTATCATCGTAGATTTTTCTTCTTTCTTGGCGCGCTCTTCCTGCAGCACGGGCGACCACCTTGATACGTTGCTTTACTCCCGCTGGCCGTAGTAC…
PITA_30609	APFE030323961.1	scaffold158649:28665-30454(-)	MTSESVNNMNLVNCGKRAPDQSITTPEKSSATPPAHSKFRGVTKNRWTDRYQARLWDGTWKKQGAKRNGKPGAYDSAERAAKAYDVAAIKFWGLTAKTNFPGRDYEKEMKEMEHMTNEELVGKLRSGVFVTQNKPGILWRHVQVSRGYQCKIQKKKKSMIISVLVFTDTEEEAAVAYDTAALKHWGPHKLVATNFDVKNYDLDQIRRPELCHSKREINTCTATASEPKSACPYKFNPHIHENNLRHHAVG*	TTATCCAACAGCATGGTGGCGGAGATTGTTCTCATGAATGTGTGGATTGAATTTATATGGGCAGGCGCTTTTGGGCTCGCTGGCAGTGGCAGTACAAGTATTGATCTCCCGCTTTGAATGACATAACTCCGGACGTCGAATTTGATCGAGATCGTAATTCTTGACGTCGAAATTAGTGGCAACCAGCTTGTGCGGCCCCCAGTGCTTAAGGGCCGCAGTATCATAAGCCACAGCAGCCTCCTCTTCTGTATCTGTGAAAACCAAAACAGATATTATCATACTTTTTTTTTTTTTTTGTATCTTACACTGGTAACCCCGCGATACTTGGACGTGCCTCCACAGAATCCCGGGCTTGTTCTGTGTCACGAAAACACCACTCCTGAGCTTCCCCACCAGTTC…
PITA_30835	APFE031070532.1	scaffold90184:47130-49126(-)	MTTRTGSLVDLDRCCKGQGKRSAALRESEIDSPNVALSLACSPSQKIVSSAATAIHVLGRQDQFARDESVELRTNEEMKNGCYTEDNQEDEMSSAMTEEFNCSVMGVSENGTQPKQETVAFKDLCSARSVEKNLHGLERMGSGISVLSVSGGESEGFEDPRRYSMSTEQAGKLLSSQYKGVVPQPNGRWGAQIYEKHQRVWLGTFNREEDAARAYDRAALKFRGRDAMTNFSPVGDGDPEVRFMSGHTKREIVDMLRKHTYDEELDHHGKRIKILAAQSAAVNNAEASGGVAAHVCQENQGQLEGNGNVASSSSADAGRAGLPHEHLFDKAVTPSDVGKLNRLVIPKQYAEKYFPLDVNSSEKGLLLNFEDNTGKVWRFRYSYWNSSQSYVLTKGWSRF…	CTATGAAAGGGACAGATTCAACTGTCCATGATGCTGCGATGACAATCTCTGGGCTTCCGGCAAAGTCACTCCGAAAAGCCGCACTCCTTTCTTGGTCGCGGGATCGAGAGTCGACGACGGTTTGTGTTCAGGGGTTTCTGATTCTTCTGATGCCCGAGCAGGGTTGAGAAAGGGATGCAGTGGTTTGAGATTAGTACTAATTTCATCGCCGCGATTAAGAGAGTTGCGGTAATTGAGATACAGTTCCGTGGGTTGACATGAAGCGGAATTGATGTCGTAAAACTTGCTTTGGATCGTTTGGTTGGTGGGCGACGCCGAGAAATAGAAAGGAAGAGTGCTGTTCAGGGGTGTTGCAGCGCTCTGAGACCACAGGGAATCAACTTTGTTGACGACCGGGGA…
PITA_31258	APFE031586076.1	scaffold54762:219211-229950(-)	MEPVLTNGEKYISGANSLFCSVHHSKDMQEMISALTRVVCGHILHPMESIAPQLVAGKKRCRDEQQTISSTMNRVKKDDISGQYLTFSPEESSTVTHLQHQQSIRENDLRSKLKDKLQQPQNSGKKRRYRGVRQRPWGKWAAEIRDPKKAARVWLGTFDTAEGAARAYDDAALKFRGARAKLNFPERVNLQDEDNPGVNIVVEENAAITDFSVQVAPATYRPSPPTYGNNLSAPARPAHSHAVHHGHPSQHFITTDSTCLSDVSDVYLSAQLLQNQWLDADQANSYPSLLQQYSELQQYSEYMQDQQLKEVYNQQLASITRIQNQPGLDDIPQLQITGRPNLASSTYTSARLPMYNNYLQRQQ*	TTATTGTTGCCGCTGCAGATAATTATTGTACATAGGTAACCTTGCACTCGTATAGGTCGATGAAGCTAAATTAGGCCTCCCTGTAATTTGCAATTGTGGAATATCATCCAATCCTGGCTGGTTTTGGATTCGCGTGATAGAAGCCAGCTGTTGGTTATAAACTTCTTTCAGCTGCTGATCTTGCATATATTCTGAATACTGCTGTAGTTCTGAATACTGCTGTAGTAAGCTAGGGTAAGAATTAGCCTGGTCAGCATCTAACCATTGATTTTGCAGCAGTTGGGCAGAGAGATATACATCTGAAACATCTGATAAACATGTTGAATCAGTGGTGATGAAATGCTGAGAAGGATGCCCATGGTGGACTGCGTGGGAATGGGCCGGTCGTGCCGGTGCCGA…
PITA_31683	APFE031298980.1	scaffold95941:30136-31284(+)	MTTQSARVRVTRPARRMEVNQRRGKPGRDGVEILEECRLRNGEMEEFDTFGNLRLYIYEGNGRCNKILGVRSAMPGKWKSEIRCGGRQRISLGTFGRAEQAARAYDAACLALRGNSAVRNFPRLRKLLPQSRSQDPKDIKEAAKQATSETVSASLSLAETLAASGDIEEQEQQSTTSASFSLAETAAGAYDSACLALKGDDAVLNFQYLINLFPPSCSRNTNDIKETARQVVHLFCRKKNDAYSF*	ATGACAACCCAAAGCGCAAGGGTTCGAGTTACACGCCCTGCTCGCAGGATGGAGGTGAATCAGAGGAGAGGAAAACCTGGGCGCGACGGAGTTGAAATACTGGAGGAGTGCAGGTTGCGAAATGGCGAAATGGAAGAGTTCGATACCTTCGGAAACCTCCGCCTATACATTTACGAAGGAAATGGACGGTGTAACAAAATATTGGGTGTGCGTTCTGCAATGCCTGGAAAATGGAAGTCTGAAATTCGATGTGGTGGCCGTCAACGGATCAGCCTGGGTACTTTTGGTCGAGCAGAACAGGCAGCCAGAGCGTACGACGCTGCTTGCCTGGCTCTGAGAGGGAACTCTGCAGTGCGAAATTTTCCGCGTTTAAGAAAGTTATTGCCACAATCGCGTTCT…
PITA_31761	APFE031622078.1	scaffold229448:78662-79441(+)	SADCTLHFHLRFSVFEFSISRQKPSDLNYKLHRDSQFQLPPHSVCIASPNMEKHYSGSPSDKDRGQNCRQFRGIRMRKWGSWVSEIRMPKTREKIWLGSYKIPEQAARAYDAAVYFLRGPKAKFNFPDSVPTIPSVSSLTRRQIQGAAAKYAMQEIPLTSPAMQNFKRNDQVGREKPASQSQPSLVSETARSCDSQQISKAQDLGLWETPFHGNGALNLEKIPSIEEASVLEYIPTWTEEQQDGFVFSDPTDLWNFRDD*	AGCGCAGACTGCACATTGCATTTTCATTTGAGATTTTCCGTTTTTGAATTCTCAATCTCTAGGCAAAAGCCTTCCGACTTAAATTACAAACTACATCGCGATTCACAGTTTCAGCTCCCACCCCACAGCGTCTGTATTGCGTCGCCAAATATGGAGAAACACTATTCCGGGTCTCCATCGGACAAAGATCGCGGACAAAATTGCCGCCAATTTAGGGGAATACGAATGCGAAAATGGGGGAGTTGGGTATCTGAAATCCGGATGCCCAAAACCAGAGAGAAGATATGGCTGGGATCATACAAAATCCCCGAGCAGGCCGCCCGTGCTTACGACGCCGCAGTGTATTTCCTGAGAGGCCCCAAAGCCAAATTCAATTTTCCGGATTCCGTGCCCACAATT…
PITA_32088	APFE031002924.1	scaffold181881:43893-45449(+)	MARREMKREIGVCEQEASSVVKEMHFRGMRKRPWGRFAAEIRDPLKKTRVWLDTFDTTEEATLACDNAARNLCGANAKTNFGPSPLHDVLLSPDFQASTCINIGNLAPHPALVIAQRLENLDLDRSAVGWKQFPRLNQPDLPEETHAFQIQVNLSGKTTMQWIFAESTLIWRFNGLWPQTSDLYQWIHTNWTKKSEIYLCSKGFFIVVFDLNEDYQKALRGGPWFWGSAGLFLTPWFLDFDPSTAVITKIPIWVRLPNLPVHLWHISIFLAIANTLGCYLAIDPSRKENGLYTYSRICAKIDISKGLPDQINLKYGNFHWTQTLDYENTTFRCCHCHQMGHLQSSCTQFLDKKKNLNRKPKSKS*	ATGGCGAGAAGGGAAATGAAGCGTGAAATAGGAGTCTGTGAGCAGGAAGCTTCGTCCGTAGTGAAGGAAATGCATTTCAGAGGCATGAGGAAAAGGCCGTGGGGGAGATTTGCGGCAGAAATTAGAGATCCCTTGAAGAAAACCAGAGTTTGGCTCGACACTTTTGACACTACTGAAGAAGCTACCCTAGCCTGCGATAATGCTGCCCGAAATCTCTGTGGTGCTAATGCGAAGACCAATTTTGGCCCCTCCCCACTGCACGATGTTCTTCTGTCCCCTGATTTTCAGGCTTCTACTTGCATTAATATCGGGAACCTTGCCCCTCATCCAGCTCTGGTCATTGCTCAAAGACTGGAAAATTTGGACTTGGATCGGTCTGCTGTTGGTTGGAAGCAGTTT…
PITA_32145	APFE030889417.1	scaffold101420:76255-78024(-)	MFGSGVAVPVQAALCNLLKVAGNDSCDLGLRLGRCCGPVKDESSSNSREPESNWTAVCRKKGMGGDLTITDKEEARSVIEDDSNSLPAPVGNSVCSNSSSFVGQTELERMGSGISAVSSENTNMPLVQGEKNYSKKLPSSQYKGVVPQPNRRWGAQIYEKHKRLWLGTFNREEDAARAYDRAARKFRGPDAITNFNFADSHSEAVFLSGYSKYEIVDMLRKHTYDEELDQNKSCSHISPEAARSNPLEPREHLFDKTVTPSDVGKLNRLVIPKQHAEKYFPLDVASGGSKGKGVMLSFEDGTDKTWRFHYSYWNSSQSYVLTKGWSRYVKEKRLQAGDIVTFERSSNSRHLFISFRHRPSSFLPPAAAPPVPKRCPLSVDPFAVAGYPQWAQLFYAAPP…	TTACTCCAGTAATGCTACCGCTGCCGGCTTACGCTTCTTTGTATTTTCACGGCCGACTTCCTCGGTTCCACTGGCCGGGAAAAGATTTAACGGCGCCTGCTCTAGGTTTACTCCAAATAACCAGAGGGAGGAAGAAGAAAGAGAATGACCGTCTCTGGACGGAAAAGACCTGTCGAGATTCACGAAGACCAGCGACGATGGATTCCCGTCATCTGACGCAGTCGGCTCGAGCGCCTTGGAATCATGGAAGTTGAGAGAATGGTGGCTGCCGCAGGCCGGAATTGAACGTTGAGCAACGGCATTCATCAGCGGCGGTGCCGCGTAGAAAAGCTGCGCCCACTGCGGATACCCGGCCACGGCGAAGGGGTCAACGGACAGGGGACAGCGTTTGGGGACCGG…
PITA_32250	APFE031162777.1	C5084199:49033-49657(-)	MCELEANLISLNGSLRVTPRDFNTLFINGGAVSESFKPSNNIFHFNHEFSSGGENEAIPLKDFEQPIFLFGRNINSKVKPLYSPKHDLSEGYSPLLSVENDENSSAKSSGRKRKALYRGLTQRPSGKWAAKIRDPRKGITVWLGTFNMAEEATKAYDVEAKKIRGKKAKLNFPND*	TTAGTCGTTAGGAAAGTTCAGCTTCGCTTTCTTTCCTCTAATCTTTTTAGCCTCCACATCATACGCCTTGGTGGCTTCCTCTGCCATATTAAACGTTCCAAGCCAAACCGTGATACCCTTTCTTGGATCTCGAATCTTTGCAGCCCATTTTCCCGATGGACGCTGCGTGAGACCTCTGTACAAAGCTTTCCTCTTCCTCCCACTGCTTTTGGCCGAGGAATTTTCGTCATTTTCAACACTTAGCAGAGGAGAGTAACCCTCAGATAAGTCATGCTTTGGCGAATATAAAGGTTTTACTTTGCTGTTTATATTCCGACCAAATAAAAAAATAGGTTGTTCGAAATCCTTGAGAGGAATCGCCTCATTTTCACCACCTGAAGAAAATTCATGGTTGAAGTG…
PITA_32731	APFE031298980.1	scaffold211856:50476-51624(+)	MTTQSARVRVTRPARRMEVNQRRGKPGRDGVEILEECRLRNGEMEEFDTFGNLRLYIYEGNGRCNKILGVRSAMPGKWKSEIRCGGRQRISLGTFGRAEQAARAYDAACLALRGNSAVRNFPRLRKLLPQSRSQDPKDIKEAAKQATSETVSASLSLAETLAASGDIEEQEQQSTTSASFSLAETAAGAYDSACLALKGDDAVLNFQYLINLFPPSCSRNTNDIKETARQVVHLFCRKKNDAYSF*	ATGACAACCCAAAGCGCAAGGGTTCGAGTTACACGCCCTGCTCGCAGGATGGAGGTGAATCAGAGGAGAGGAAAACCTGGGCGCGACGGAGTTGAAATACTGGAGGAGTGCAGGTTGCGAAATGGCGAAATGGAAGAGTTCGATACCTTCGGAAACCTCCGCCTATACATTTACGAAGGAAATGGACGGTGTAACAAAATATTGGGTGTGCGTTCTGCAATGCCTGGAAAATGGAAGTCTGAAATTCGATGTGGTGGCCGTCAACGGATCAGCCTGGGTACTTTTGGTCGAGCAGAACAGGCAGCCAGAGCGTACGACGCTGCTTGCCTGGCTCTGAGAGGGAACTCTGCAGTGCGAAATTTTCCGCGTTTAAGAAAGTTATTGCCACAATCGCGTTCT…
PITA_32876	APFE031075797.1	scaffold83939:9659-30988(-)	MSPTRSGYKELGLELVEPLQDQPRKSRWPPMADEKKDERAGDPIKILLEEALERQRNAMMDNFAQILQQLPGSNTSASSSYSGNATPFKVQVNFEIPIFKVEDDIDTINPSLASSAATPGSCDYLPNTTTAGSSSQNSGSKSTAEGNDNDFTQHHHHFSSSSSSVKPEGQEEDVREMKESQARHYRGVRYRTWGKFTAEIRDPGKKGGRAWLGTFNTAKEAALAYDRAAFRIRGTRALVNFPLALASNSETESGEGQKRKRRCSGGGTGVKDWRSCRGLATQMINERSGSESSE*	TCATTCACTGCTCTCACTTCCACTCCTTTCATTTATCATTTGGGTTGCAAGTCCTCTACAAGACCTCCAGTCCTTCACTCCGGTTCCACCGCCACTGCATCTTCTCTTCCTCTTCTGACCCTCGCCCGATTCAGTCTCTGAATTGGAAGCGAGGGCAAGGGGAAAATTAACTAAAGCTCTGGTTCCGCGGATTCTGAAAGCAGCACGGTCATATGCGAGAGCCGCCTCTTTGGCCGTGTTGAAAGTGCCCAACCAAGCCCTGCCCCCTTTCTTGCCCGGATCTCTTATTTCTGCTGTAAATTTCCCCCATGTCCGATACCTGACACCTCTGTAGTGTCTCGCCTGGCTCTCCTTCATCTCCCTAACATCCTCCTCCTGTCCCTCTGGCTTTACAGATGA…
PITA_33019	APFE031716260.1	scaffold96307:4620-5612(+)	MEVNQRRGKTGRDGVEILEESRLRNGEMEEFDTFGNLRLYIYEGNGRCNKILGVRSAMPGKWKSEIRCGGRQRISLGTFGRPEQAAKAYDAACLALRENSAVRNFLRLTKLLPQSRSQDPKDIKEAAKQAHIIKPSSLHYGRVFDDQMTLLDAK*	ATGGAGGTGAATCAGAGGAGAGGAAAAACTGGGCGCGACGGAGTTGAAATACTGGAGGAGTCCAGGTTGCGAAATGGCGAAATGGAAGAGTTCGATACCTTCGGAAACCTCCGCCTATACATTTACGAAGGAAATGGACGGTGTAACAAAATACTGGGTGTGCGTTCTGCAATGCCTGGAAAATGGAAGTCTGAAATTCGATGTGGTGGCCGTCAACGGATCAGCCTGGGTACTTTTGGTCGACCAGAACAGGCAGCCAAAGCGTACGACGCTGCTTGCCTGGCTCTGAGAGAGAACTCTGCAGTGCGAAATTTTCTGCGTTTAACAAAGTTATTGCCACAATCGCGTTCTCAGGACCCCAAAGATATAAAAGAGGCAGCTAAACAAGCACATATTATC…
PITA_33086	APFE030477946.1	scaffold120874:51635-52220(-)	MALETAFPHGAEGSYRHHNSVVVSSERLLEDVWTHFIATGTHHPIHDELQPVSRSNHGKEGNCWNPEVSVLPLKENDSEDMIIFQLLNDAAKHRWSTDHEQQETEIPGLTGSMARMPAICNTEKKGAEGEGAEKSKRYRGVRTRPRGKFAAEIRDSGRLGARVWLGTYKTAEEAAMAYDKAAFLIRGARASLNFPD	CGGGGAAGTTTAAAGAAGCCCGAGCTCCGCGAATGAGAAAAGCAGCTTTATCATAAGCCATAGCGGCCTCCTCCGCCGTTTTATAAGTCCCGAGCCACACTCGAGCTCCCAGCCTTCCTGAATCTCTTATTTCCGCTGCAAATTTACCACGCGGACGTGTCCGGACTCCTCTGTACCGCTTCGACTTCTCTGCACCTTCACCTTCGGCCCCTTTCTTTTCAGTATTGCAGATCGCAGGCATGCGGGCCATAGATCCAGTTAATCCAGGGATTTCCGTCTCCTGCTGTTCATGATCTGTAGACCATCTATGCTTAGCGGCGTCGTTCAGAAGTTGGAAGATTATCATGTCCTCTGAGTCGTTCTCTTTCAGTGGCAGCACGGAAACTTCAGGATTCCAGC…
PITA_33175	APFE030191917.1	scaffold97728:32074-33201(-)	IPPLEDVEGSAPTIGGRKRKNVYRGIRQRPWGKWAAEIRDPSKGVRVWLGTFNTAEEAARAYDAAAKRIRGKKAKLNFADNSCSVKNDTSKKVSGKKGKLCSKHPALLLEGFNASCKVKPSYSANPDFLGCYNINRKVKASLSGVGKSDLTICGYDDMEYGDSEFSKPSAPFQNNSNACTVQFSEHSNLAQTSQKSCSCEICSHNYSEMSNVMPPAYINAVNFEPVQTSNPGGYFDSDHSSMSFEGAHFPWAQEIKTPEVSSICDDANESAFVDIKPVDNVVKAKPVDTPIEVDGGTDDCYKTQDGDGQFDKQLSALESYLGLSENSIAKANLCIEGAGRSAGSFPDEQCFLEQWFLDDLPNSGLRYPSSLGSRI*	TCAGATGCGAGAACCAAGACTGCTTGGATAACGTAAACCTGAATTTGGCAGATCATCCAAGAACCATTGTTCCAGGAAACACTGCTCATCTGGAAAAGAGCCCGCAGAGCGACCTGCACCTTCTATACACAGATTTGCTTTAGCAATAGAATTCTCAGACAACCCAAGATATGATTCCAGAGCAGACAACTGTTTGTCAAACTGCCCGTCGCCATCCTGTGTTTTGTAGCAATCGTCTGTCCCACCATCGACCTCAATAGGGGTATCCACAGGTTTGGCCTTAACAACATTATCGACCGGCTTGATGTCCACAAAAGCAGACTCATTTGCGTCATCACATATAGAAGAAACTTCTGGGGTCTTTATTTCTTGAGCCCATGGGAAATGTGCCCCTTCAAA…
PITA_33747	APFE030435019.1	scaffold33243:6374-9512(+)	MEINQSQYGWPEAMGAAEADSMNITMNMLELIRHHLLEVDDDIDIGEGSSPLSFSPTDSGSGVHNSIDDHDYDDTETNGIATMGSCQNINSKSISEGNENEFRQQDCASCYSYSFKVKPQEDENGAMNQIWGRHYRGVRRRPWGKFAAEIRDPSRKGSRIWLGTFDTAEEAALAYDRAAFSIRGAKALVNFPLAVAPNSEKGSPVGHMELRRQGSIGFARAEDLKAVVQSVVALKDFMDHTAMLATPNQRTISYSAHMAVAH*	ATGGAAATTAACCAATCTCAATATGGATGGCCGGAGGCAATGGGCGCTGCAGAAGCAGACAGCATGAATATTACCATGAATATGTTGGAGCTTATCCGCCACCATTTGCTGGAAGTTGATGACGATATTGATATCGGAGAAGGGAGCTCACCGTTGTCGTTCTCCCCTACGGACAGTGGCAGCGGCGTTCATAATAGTATCGATGATCATGATTATGATGATACGGAGACCAATGGCATAGCCACCATGGGATCCTGCCAAAATATCAACAGCAAATCAATATCGGAAGGCAATGAAAATGAATTTAGACAACAAGATTGCGCTTCTTGTTATTCTTATTCTTTCAAGGTGAAGCCACAAGAAGACGAGAATGGCGCGATGAACCAGATCTGGGGTAGG…
PITA_33816	APFE030994856.1	scaffold222229:39635-47340(-)	MEITAGQSLTMNMLELIRHHLLEVEDEMDIMHLYHPGGNDPSSSSSSVSSPRVSWEYLHGTATATGSGSCQNRSPSEDNESSQYSSASTSVSTVTRRTEAVNINVKPQPREEQSVEKNNEIHYRGVRKRTWGKFAAEIRDPAKQGARVWLGTFVTAEEAALAYDRAAFRIRGAKAVLNFPLAFASISENGSAVGHMGNKRKRGRGETNEEWAACDRGSSITAGQSLSMNMNMVELIRHHLLEVEDEMDIMHLYHQGGNDPSSSSSSVSSPRVSWEYLHGTATATASGSCQNSGGRSPSEDNESSQYSSASTSVSTVTRRTEGININVKPQPREEQSVEKNNGIHYRGVRKRTWGKFPAEIRDPTMLL*	TTACAAGAGCATGGTGGGGTCCCTGATTTCAGCTGGGAATTTACCCCATGTCCTCTTCCTCACTCCTCTGTAGTGAATTCCATTGTTCTTTTCCACACTCTGCTCCTCCCGTGGCTGTGGCTTCACATTTATATTTATCCCCTCTGTTCTTCTTGTGACTGTGGATACAGAAGTAGAAGCAGAAGAGTATTGTGAACTCTCATTGTCTTCGGATGGTGATCTGCCGCCGCTGTTTTGGCATGAACCACTTGCTGTGGCGGTGGCAGTGCCATGGAGATATTCCCAGCTGACTCTGGGGGAAGATACTGAAGACGATGAAGAGGATGGATCATTTCCTCCTTGGTGATACAGATGCATAATATCCATTTCGTCCTCCACTTCCAGCAAATGGTGGCGGAT…
PITA_33872	APFE031298980.1	C4057559:1080-2228(+)	MTTQSARVRVTRPARRMAVNQRRGKPGRDGVEILEECRLRNGEMEEFDTFGNLRLYIYEGNGRCNKILGVRSAMPGKWKSEIRCGGRQRISLGTFGRAEQAARAYDAACLALRGNSAVRNFPRLRKLLPQSRSQDPKDIKEAAKQATSETVSASLSLAETLAASGDIEEQEQQSTTSASFSLAETAAGAYDSACLALKGDDAVLNFQYLINLFPPSCSRNTNDIKETARQVVHLFCRKKNDAYSF*	ATGACAACCCAAAGCGCAAGGGTTCGAGTTACACGCCCTGCTCGCAGGATGGCGGTGAATCAGAGGAGAGGAAAACCTGGGCGCGACGGAGTTGAAATACTGGAGGAGTGCAGGTTGCGAAATGGCGAAATGGAAGAGTTCGATACCTTCGGAAACCTCCGCCTATACATTTACGAAGGAAATGGACGGTGTAACAAAATATTGGGTGTGCGTTCTGCAATGCCTGGAAAATGGAAGTCTGAAATTCGATGTGGTGGCCGTCAACGGATCAGCCTGGGTACTTTTGGTCGAGCAGAACAGGCAGCCAGAGCGTACGACGCTGCTTGCCTGGCTCTGAGAGGGAACTCTGCAGTGCGAAATTTTCCGCGTTTAAGAAAGTTATTGCCACAATCGCGTTCT…
PITA_34240	APFE030843233.1	C4738263:7983-10830(+)	MDLSLFAALSARVSAASSSRESSLMAPTDTNGDHNGESVRDANVNATSEEVHYRGVRKRSWGRYTAEIRDPTIKKRRWLGTFDTSEEAAKAYDKAARLLKGGKAKTNFAIPDSAENQVHTTTTVRAQNQRRSSNPSSILPAPSFNHNMASVRSAFCEEVKPWFYVNKERKSYSILFQLFNMIFSWQA*	ATGGATCTATCTCTCTTTGCTGCTCTGTCCGCCAGAGTCTCTGCTGCTTCGTCCTCAAGGGAAAGCTCCTTAATGGCTCCCACTGATACGAATGGAGATCACAATGGCGAGAGTGTCAGAGACGCAAATGTAAATGCAACGAGTGAAGAAGTGCATTACAGAGGAGTGAGAAAAAGGTCATGGGGTAGATATACGGCGGAGATCAGAGATCCAACAATCAAGAAGCGAAGGTGGCTTGGCACCTTCGATACTAGCGAAGAAGCAGCGAAGGCGTATGATAAGGCCGCAAGGCTTTTAAAAGGAGGAAAGGCCAAAACCAACTTCGCGATCCCTGACAGCGCCGAAAACCAAGTCCACACCACCACCACTGTCCGCGCCCAGAACCAGAGGCGCAGTTCC…
PITA_34353	APFE031706912.1	C4132509:3894-4481(+)	MCGPEANLISLNGSLRVTPRDFNTSSESFKPSNNIFHFNHEFSSGGENEAIPLKDFEQPVFLFGRNINSKVKPLYSPKHDSPLLSAENDENSSAKSSGRKRKTLYRGITQRRWGKWAAQIRDPRKGITVWLGTFNTAEEAAKAYDAEAKKIRGKKAKLNFPDD*	ATGTGTGGACCTGAAGCGAATCTCATTTCCCTCAACGGGTCTCTGCGTGTAACTCCCAGGGATTTCAATACGTCGTCGGAATCTTTCAAGCCCAGCAACAATATTTTCCACTTCAACCATGAATTTTCTTCAGGTGGTGAAAATGAGGCTATTCCTCTCAAGGATTTCGAACAGCCTGTTTTTTTATTTGGTCGGAATATAAACAGCAAAGTGAAACCTTTATATTCACCAAAGCATGACTCTCCTCTGCTAAGTGCTGAAAATGACGAAAATTCCTCGGCCAAAAGCAGCGGGAGGAAGAGGAAAACTTTGTACAGAGGTATCACGCAGCGTCGATGGGGAAAATGGGCTGCACAGATTCGAGATCCAAGAAAGGGCATTACGGTTTGGCTTGGAACG…
PITA_34591	APFE030437918.1	scaffold25847:182768-183647(-)	MCGDEADIIPLNRSRRVTPRDFDTFADLFINGGAVSESFKKSCSFDDEDKQKIEPGAVSESLNKSGSFDDEDKQKIEPSKNIFSFKHEFSSGGENEAIPSLKDFKIPPLKGFERSSAKGTGRKRTTLYRGIRQRPRGKWAAEIRDPRKGTMVWLGTFNTAEEAAKAYDAEAKKIRGKKAKLNFADHSCSVKMDTSKKMSRKKVKSCTENPDLLLGLNINSKNKAWHRVA*	TCAAGCTACACGATGCCATGCTTTGTTCTTACTGTTTATGTTCAGACCCAACAATAAATCAGGGTTTTCTGTACATGACTTTACTTTCTTCCTTGACATTTTCTTGCTAGTGTCCATCTTTACGGAACACGAGTGATCGGCAAAATTAAGCTTGGCTTTCTTGCCTCTGATCTTTTTAGCCTCTGCATCATAGGCCTTGGCGGCCTCCTCTGCCGTATTAAACGTTCCAAGCCAAACCATAGTGCCCTTTCTAGGATCTCGAATCTCCGCAGCCCATTTTCCCCGTGGACGCTGCCTGATACCTCTATACAATGTCGTCCTCTTCCTCCCGGTGCCTTTGGCTGAGGACCTTTCGAAACCCTTCAAAGGAGGAATCTTGAAATCTTTCAAAGAAGGAAT…
PITA_34672	APFE031284705.1	scaffold128486:17654-18522(-)	MAPTDGNLSKRVVDEDVNDAKEVNYRGVRKRPWGKYGAVIRDPSIKRRRWLGTFDTADEAARAYDNAARTLKGVKAKTNFPAPSLPLDTVGIQRSTRAATSAPLPSPPANHDNNKNGLSANISEQIKPWTHVYIDDGLETQRVKEHSMSPWSIPNIIPTNLIDFAILLQQQSPPMVMPLWGNIVAPDMIIKPNNNEWVEAGVMNNKVPTASLQTEGLCLF*	TTAGAACAGACAGAGGCCCTCAGTCTGTAGGCTGGCTGTAGGAACCTTATTGTTCATTACACCTGCTTCGACCCACTCATTGTTGTTGGGTTTTATAATCATGTCAGGCGCCACAATGTTTCCCCACAAGGGCATCACCATTGGCGGTGACTGTTGTTGCAGAAGGATAGCGAAGTCTATAAGATTGGTGGGAATAATATTGGGAATACTCCATGGACTCATGCTGTGTTCCTTCACTCTTTGCGTTTCCAATCCATCATCGATATAAACGTGCGTCCAGGGCTTTATTTGTTCAGAGATATTGGCAGACAACCCATTCTTGTTGTTGTCGTGATTAGCAGGCGGAGAGGGAAGAGGAGCGCTAGTGGCGGCCCGGGTGGATCTCTGGATGCCGACTGT…
PITA_34957	APFE031175486.1	C4608085:11653-12382(-)	METTYDIMKPGNCENGCYVVSISLHNGKLVIHCQTSPEKLDDQFDLAEFKAPEDLCAKFRRPSTQLEDRGFLFMLFCLWLGFERAENEAIPPLKDFEKLRPKGKWAAEIRDPRKGIVVWLGTLNTTEEAAKAYDAEAKKIIGEKVKLDFPDHSCFVKVDTSQKMSGMKVKPCTEQPVLLFGGNINSKVKHLYSPKPDLSKGYS*	CTAAGAGTAACCTTTTGATAAGTCAGGCTTTGGTGAATATAAATGTTTTACCTTACTGTTTATATTCCCACCAAATAATAAAACAGGCTGTTCTGTACACGGCTTTACTTTCATCCCTGACATTTTCTGGCTAGTGTCCACTTTTACAAAACACGAGTGATCCGGAAAGTCGAGTTTCACTTTCTCGCCTATGATCTTTTTAGCCTCTGCATCATACGCCTTGGCGGCCTCCTCTGTCGTATTAAGCGTTCCAAGCCAAACCACAATGCCCTTTCTTGGATCTCGAATCTCCGCAGCCCATTTTCCCTTTGGACGCAGCTTTTCGAAATCCTTCAGAGGAGGAATCGCTTCATTTTCAGCACGTTCAAAACCCAACCAGAGGCAAAATAACATAAAAAG…
PITA_35223	APFE030980209.1	C3940089:5324-6395(+)	MTTQSARVRVTRPARRMEVNQRRGKPGRDGVEILEECRLRNGEMEEFDTFGNLRLYIYEGNGRCNKILGVRSAMPGKWKSEIRCGGRQRISLGTFGRAEQAARAYDAACLALRGNSAVRNFPRLRKLLPQSRSQDPKDIKEAAKQATSETVSASLSLAETLAASGDIEEQEQQSTTSASFSLAETAAGAYDSACLALKGDDAMLNFQYLINLFPPSCSRN	ATGACAACCCAAAGCGCAAGGGTTCGAGTTACACGCCCTGCTCGCAGGATGGAGGTGAATCAGAGGAGAGGAAAACCTGGACGCGACGGAGTTGAAATACTGGAGGAGTGCAGGTTGCGAAATGGCGAAATGGAAGAGTTCGATACCTTCGGAAACCTCCGCCTATACATTTACGAAGGAAATGGACGGTGTAACAAAATATTGGGTGTGCGTTCTGCAATGCCTGGAAAATGGAAGTCTGAAATTCGATGTGGTGGCCGTCAACGGATCAGCCTGGGTACTTTTGGTCGAGCAGAACAGGCAGCCAGAGCGTACGACGCTGCTTGCCTGGCTCTGAGAGGGAACTCTGCAGTGCGAAATTTTCCGCGTTTAAGAAAGTTATTGCCACAATCGCGTTCT…
PITA_35291	APFE031200408.1	C4704191:19944-20531(-)	MCGPEANLISLNGSLRVTPRDFNTSSESFKPSNNIFHFNHEFSSGGENEAIPLKDFEQPVFLFGRNINSKVKPLYSPKHDSPLLSAENDENSSAKSSGRKRKTLYRGITQRRWGKWAAQIRDPRKGITVWLGTFNMAEEAAKAYDAEAKKIRGKKAKLNFPDD*	TTAGTCGTCAGGAAAGTTCAGCTTCGCTTTCTTTCCTCTGATCTTTTTAGCCTCTGCATCATACGCCTTGGCGGCTTCCTCTGCCATATTAAACGTTCCAAGCCAAACCGTAATGCCCTTTCTTGGATCTCGAATCTGTGCAGCCCATTTTCCCCATCGACGCTGCGTGATACCTCTGTACAAAGTTTTCCTCTTCCTCCCGCTGCTTTTGGCCGAGGAATTTTCGTCATTTTCAGCACTTAGCAGAGGAGAGTCATGCTTTGGTGAATATAAAGGTTTCACTTTGCTGTTTATATTCCGACCAAATAAAAAAACAGGCTGTTCGAAATCCTTGAGAGGAATAGCCTCATTTTCACCACCTGAAGAAAATTCATGGTTGAAGTGGAAAATATTGTTGCT…
PITA_35351	APFE031235769.1	C5029479:287-889(+)	MCGPEANLISLNGSLRVTPRDFNTSSESFNPSNNIFHFNHEFSSGGENEAIPLKDFEQPVFLFGRNINSKVKPLYSPKHDLSEGYSPLLSAENDENSSAKSSGRKRKTLYRGLTQRPSGKWAAKIRDPRKGITVWLGTFNTAEEAAKAYDAEAKKIRGKKAKLNFPDD*	ATGTGTGGACCTGAAGCGAATCTCATTTCCCTCAACGGATCTCTGCGTGTAACTCCCAGGGATTTCAATACGTCGTCGGAATCTTTCAACCCCAGCAACAATATTTTCCACTTCAACCATGAATTTTCTTCAGGTGGTGAAAATGAGGCGATTCCTCTCAAGGATTTCGAACAGCCTGTTTTTTTATTTGGTCGGAATATAAACAGCAAAGTAAAACCTTTATATTCACCAAAGCATGACTTATCTGAGGGTTACTCTCCTCTGCTAAGTGCTGAAAATGACGAAAATTCCTCGGCCAAAAGCAGCGGGAGGAAGAGGAAAACTTTGTACAGAGGTCTCACGCAGCGTCCATCGGGAAAATGGGCTGCAAAGATTCGAGATCCAAGAAAGGGCATCACG…
PITA_35587	APFE031523030.1	scaffold61593:21570-24158(-)	MNAGYEGSDLSRFFSGVDCSKDLLSIIYSLFGVDGGCVLYPMENKPDQLEAGQKRREIAQQTITFTTHGVKENDITGQHITASSGQERPSIVTPPQHQQRNRENKTNFKRKELDPRNPPPKRHYKGVRQRPWGKWVAEIRDPKKETRVWLGTFETAEDAGRAYDDTALKFRGSRAKLNFPERTNLQYEDPPCMNMPKQETTAIADFGIQVAHGTYSLTLPTNGDNCSAALEGYRSLHVESISGETYSYRLHRGIPPRYFMPADSPCLSKFSDVYHHG*	TTAGCCATGGTGATATACATCTGAAAATTTTGATAAACACGGTGAGTCAGCTGGCATGAAATACCGTGGTGGAATCCCACGGTGGAGTCGATAAGAATACGTTTCTCCACTTATGCTTTCCACGTGTAGACTACGATAGCCTTCCAGCGCTGCCGAACAATTATCACCATTAGTCGGTAGAGTTAAGCTGTAGGTTCCGTGTGCAACTTGAATACCGAAGTCGGCAATTGCTGTGGTTTCTTGTTTTGGCATGTTCATACAGGGAGGATCCTCGTATTGGAGGTTGGTTCTTTCTGGAAAGTTCAATTTCGCCCTTGACCCTCGAAATTTTAAAGCAGTGTCGTCGTATGCTCTCCCAGCATCTTCTGCGGTCTCAAATGTGCCCAGCCATACTCGTGT…
PITA_36015	APFE031681176.1	C4646305:1280-3059(-)	MTSESVNNMNLVNRGKRAPDQSITTPEKSSATPPAHSKFRGVTKNRWTDRYQARLWDGTWKKQGAKRNGKPGAYDSAERAAKAYDVAAIKFWGLTAKTNFPGRDYEKEMKEMEHMTNEELVGKLRRLQWCFRDTEQAWDSVEARPSIAGLADTEEEAAVAYDTAALKHWGPHKLVATNFDVKNYDLDQIRRPELCHSKREINTCTATASEPKSACPYKFNPHIHENNLRHHAVG*	TTATCCAACAGCATGGTGGCGGAGATTGTTCTCATGAATGTGTGGATTGAATTTATATGGGCAGGCGCTTTTGGGCTCGCTGGCAGTGGCAGTACAAGTATTGATCTCCCGCTTTGAATGACATAACTCCGGACGTCGAATTTGATCGAGATCGTAATTCTTGACGTCGAAATTAGTGGCAACCAGCTTGTGCGGCCCCCAGTGCTTAAGGGCCGCAGTATCATAAGCCACAGCAGCCTCCTCTTCTGTATCTGCTAACCCCGCGATACTTGGACGTGCCTCCACAGAATCCCAGGCTTGTTCTGTGTCACGAAAACACCACTGCAATCTCCTGAGCTTCCCCACCAGTTCTTCATTAGTCATGTGCTCCATCTCTTTCATCTCTTTTTCATAGTCCCT…
PITA_36019	APFE030818611.1	scaffold21584:196569-197177(-)	MEITSQEQHTNTLPCNECSEKRPKFKGIRMRKWGRWGSEIRMPKTGTKIWLGSYETAEQAARAYDAALYCLRGPNAKFNFPDSVPSIPSAFSLSRHQIQLAAARYARDELPSTSLSPRTNNINNGVSLASPSRSPRVSETELQKSNGEQVSEEWGFWASPLDSSGCLNFQNIPSIDDTSALDFIPTWQDEQDGYISLDLWNF*	TTAGAAGTTCCACAAGTCTAGCGAGATGTAACCATCCTGCTCATCCTGCCAAGTCGGAATAAAGTCCAACGCGGAGGTGTCGTCAATGGATGGGATGTTCTGGAAGTTGAGGCACCCACTGCTGTCCAACGGAGACGCCCAGAAACCCCATTCCTCCGAAACCTGCTCGCCGTTGCTCTTCTGCAGCTCCGTTTCTGAAACCCTAGGTGATCGCGACGGGGAGGCGAGGGAGACGCCATTATTGATATTGTTAGTGCGTGGAGAAAGCGAAGTAGAAGGCAGTTCGTCCCGGGCATATCTAGCGGCGGCGAGCTGAATCTGGTGGCGTGAAAGAGAAAACGCCGACGGAATTGAAGGTACAGAGTCCGGAAAGTTGAATTTGGCGTTGGGGCCTCTCAA…
PITA_36094	APFE031101523.1	scaffold114278:10540-13213(-)	MENKTDQIVAGQKRRRDELQMTTLATHCFKVDDIACQTFSVSSSEEVPSITMPHQHQHQERFPSQEGISWKRDEELPQPQNPPKKKRYRGVRQRPWGKWAAEIRDPKKAARVWLGTFETAEDAARAYDDAALKFRGSRAKLNFPERINLQDEAHLCVNIAKNEALTDLSVQVPPVTSSIFPPTYFNTLSAPTEHRRSGRVERTSGAAFFEPQNPCQQFIRTDSACLSHLSDAHNHAPLQHNPGLTCLSQFSNPFDHAQLMHNPGFHTEQANSHPSLLQQYFSNFRSQQQPEPYNHHLPSVTSIQNHLGWEYNRQVQVTRKPTLVSSPYTSVRPSMFNNYVQQQQQQHMLDHQQRAPSITTTGNEELYSLRGRNIDQTSGNWPASAQSQYEFSDNLDYSS…	CTAAACATCTGGGCAGTGCCAACTATGTGCATGACGAACTACTGAACTGTAGTCTAAATTATCAGAGAATTCGTATTGGGATTGAGCAGAAGCCGGCCAGTTGCCAGATGTCTGATCAATATTTCTTCCGCGCAAGCTATATAACTCTTCATTCCCTGTTGTGGTAATTGATGGAGCTCGCTGCTGGTGATCAAGCATGTGTTGTTGCTGCTGCTGCTGTACATAATTATTGAACATAGATGGCCTGACACTTGTGTAAGGTGATGAAACTAAAGTAGGTTTCCTTGTAACCTGCACTTGTCGATTATATTCCCATCCAAGATGGTTTTGGATGGACGTGACAGAAGGCAGATGATGGTTATAAGGTTCTGGTTGCTGCTGAGATCTGAAATTAGAAAA…
PITA_36290	APFE031175486.1	C4405175:4137-4866(-)	METTYDIMKPGNCENGCYVVSISLHNGKLVIHCQTSPEKLDDQFDLAEFKAPEDLCAKFRRPSTQLEDRGFLFMLFCLWLGFERAENEAIPPLKDFEKLRPKGKWAAEIRDPRKGIVVWLGTLNTTEEAAKAYDAEAKKIIGEKVKLDFPDHSCFVKVDTSQKMSGMKVKPCTEQPVLLFGGNINSKVKHLYSPKPDLSKGYS*	CTAAGAGTAACCTTTTGATAAGTCAGGCTTTGGTGAATATAAATGTTTTACCTTACTGTTTATATTCCCACCAAATAATAAAACAGGCTGTTCTGTACACGGCTTTACTTTCATCCCTGACATTTTCTGGCTAGTGTCCACTTTTACAAAACACGAGTGATCCGGAAAGTCGAGTTTCACTTTCTCGCCTATGATCTTTTTAGCCTCTGCATCATACGCCTTGGCGGCCTCCTCTGTCGTATTAAGCGTTCCAAGCCAAACCACAATGCCCTTTCTTGGATCTCGAATCTCCGCAGCCCATTTTCCCTTTGGACGCAGCTTTTCGAAATCCTTCAGAGGAGGAATCGCTTCATTTTCAGCACGTTCAAAACCCAACCAGAGGCAAAATAACATAAAAAG…
PITA_36346	APFE031717088.1	super973:384780-385325(-)	MAKPSQNQNRRNRRENRLRKSRQFKGIRMRKWGKWVSEIRMPNSIGRIWLGSYDTPEMAARAYDFAVYCLRGSKGKFNFPHSLPEISCASSLSPSQIQAAAAKYAAGELLLPSEDAVFSTSFTEAECGNDGQDMSAFRDSLPEDVDNSETLIFEDFPHWDVAMEDFEDLFPMMENWGSGAF*	TTAGAAAGCCCCACTTCCCCAGTTTTCCATCATTGGGAACAGATCCTCAAAATCCTCCATAGCAACATCCCAGTGTGGAAAATCCTCGAAAATTAGAGTCTCGCTATTGTCCACATCTTCAGGAAGAGAGTCCCGAAATGCTGACATATCTTGACCGTCATTTCCGCATTCCGCTTCCGTAAAGGAAGTTGAGAACACCGCATCTTCAGAAGGCAGAAGGAGTTCTCCTGCGGCGTACTTGGCGGCGGCAGCTTGAATTTGCGACGGTGATAGAGATGAAGCGCAGGAGATTTCCGGCAGGGAGTGGGGAAAATTGAACTTGCCTTTCGATCCCCTGAGACAATACACGGCAAAATCGTAGGCGCGCGCAGCCATTTCTGGCGTGTCATAAGAGCCTAA…
PITA_36783	APFE030317067.1	scaffold51187:9513-15058(-)	MENKPDQSEAGQKRRGTAQQTITFTTHGVKENDITGHHITASSDQEGPSIVTLPHFQQRNRENETNFKRKELNPRNPPPKRHYRGVRQRPWGKWAAEIRDPKKAARVWLGTFETAEDAGRAYDDAALKFRGSRAKLNFPERINLRNEDPPGMNMPKQETAAIADIGIQVARATSCRSLPTNGDDLSAAPEGCRTLHVESISGETYSDRLHHGVPPPYFMQVESPCLSIFSDVYHHGQPMQNLGFDAEQANCNPSLVPPYSAYMRYQQKPEPFNQQLASMMSIQNEPALDYNGQLPSTSRPNLVSSNYTGSRVPMFNNYVQTQQLQQHMLIHQQQVPLFSTTGYEELYNFRERIVDHTSDNLLVCSPSQSESYDNLDYNSGVLPARNLKGPEH*	TCAATGTTCTGGGCCCTTCAAATTACGTGCAGGAAGAACTCCTGAATTGTAATCCAAATTATCGTAGGATTCAGATTGAGACGGAGAACAGACTAGCAAGTTGTCAGATGTGTGATCAACGATTCTTTCACGAAAGTTATACAGCTCCTCATACCCTGTGGTGCTAAATAGTGGGACCTGCTGTTGATGAATAAGCATATGTTGCTGCAGCTGCTGCGTCTGCACATAGTTATTGAACATGGGTACCCTCGAACCTGTGTAATTCGATGAAACTAAATTAGGCCTACTTGTACTTGGCAGTTGTCCATTATAATCTAGGGCTGGCTCGTTTTGGATGGACATCATAGAAGCCAACTGTTGATTAAAGGGTTCTGGCTTCTGCTGATATCTCATATAAGC…
PITA_36833	APFE031407445.1	C3996785:2233-3033(+)	MAMKDRNQEAEYTEMSVLDRIRIHLLGDSDGQDFESSFYLTPKNQSNSIREQENSIMSALACNSVDDKIPKTEKETPTLAVNSSRCSLPISVSPHEYVDWEKFTVGWEIRNYVSVMPPSLSPGLTRAWSKFPLDENKAEDIAFSRILEEAVKRRWMPVTQAEGTKTETKKEADIFSVVLDPNVRQETECQQPAAKKMISGRRYRGVRRRPWGKFAAEIRDSARQGARLWLGTFTTAEEAALAYDRAAFKMRGSRAVLNFPHLVKGE*	ATGGCAATGAAGGACAGAAATCAAGAAGCCGAGTATACAGAAATGAGCGTTTTGGATCGAATCCGGATCCATCTACTCGGCGACTCCGACGGCCAGGATTTCGAATCCTCGTTCTATCTGACGCCAAAGAACCAGTCAAACTCAATCCGCGAACAAGAAAACTCCATCATGAGCGCACTCGCTTGCAATTCCGTGGATGACAAGATACCGAAAACGGAGAAAGAAACCCCGACTCTAGCCGTTAACTCCTCCCGTTGCTCGCTCCCCATCTCCGTTTCTCCACACGAATATGTAGATTGGGAGAAATTTACCGTTGGCTGGGAAATCAGAAATTATGTCAGCGTCATGCCTCCGTCTCTCAGCCCCGGTTTAACCCGTGCCTGGTCGAAGTTCCCATTA…
PITA_36862	APFE031046414.1	scaffold4117:233365-236036(+)	MESAAVSTSLALPLSLQMEMNSINSRKRSAEFSERVDISEPGEISGPAETSEQSNVAEEVESDTTYAFRGVTRHRWTGRYEAHLWDGTFTKPGAKRNGKQGGYASAKMAARSYDIAALKYWGSAAKTNFLPVNYEKEIREMENSTREEVVNMLRRQSAAFARGISKYRGVTRWQARIGRVADNKDMYLGSFDTEEEAARAYDIATIKYRGRNAVTNFDIRHYNVEMILSESSQPRRVKQTRKSTTPPLRDRLSDNSNGISQQMDAVSSNNTVSAAVEQNRIEAPGKDALYQPQAQGVGIPQLPNQPTPLGPAIPQLPNQPTPLGPAALQLPNQPTPLGPAIPQLSNQPMPLGTVGEVGDQNGPLYVLDPFTGTTYCMPRRMVFPFCEFPYLNMPPMFPG…	ATGGAGTCTGCTGCAGTATCAACTAGTTTAGCACTGCCATTGTCGCTTCAAATGGAAATGAACTCTATAAACAGCAGGAAGCGAAGCGCTGAATTTTCGGAACGTGTTGATATTTCAGAACCTGGTGAAATTTCAGGACCTGCTGAAACTTCAGAACAATCAAATGTTGCTGAGGAAGTGGAGTCGGATACCACTTATGCGTTTCGCGGGGTCACAAGGCATAGATGGACTGGCAGGTACGAAGCCCATCTATGGGACGGTACCTTCACAAAACCAGGTGCCAAGCGCAATGGTAAACAAGGTGGATATGCTTCGGCTAAAATGGCAGCCAGATCTTATGATATTGCAGCTCTTAAGTACTGGGGATCAGCTGCGAAAACTAACTTTCTTCCTGTCAAT…
PITA_37379	APFE030988210.1	scaffold619:67560-69092(+)	MVTDITHRGHFCSIYSEDIHSEDYLYTGGLISDRHGILWAQPVTIFQSRDTMKSQQQQPELQKNGSVSPSKLSEKQFKRGKEAGRYRGVRRRPWGRFAAEIRDPKTKERRWLGTFDTAEEAAYAYDFAATVMRGMKARTNFTYLDSEHCITSTPPPAALTSTTFPTNIRSPFSHRPQKLQDSSATCNEPKQQQRKQQFSLNDGYNVLGNMVVNSCLRPLNQDIENNNQSLAGDSSCPASLPKDHYSINGSPWQNMPLADPILLSSSKHIIDQTHNSTIPSSVSLSASLSLATKTSDHQPAFIKNITTNIPLSNLVESISSIPCLEEPASELCSSFSSYSYALSSNVEHQFQNSADSNGYSDSGLLEQIISGYLPIPVPTSPRCSVYSPKDMNHDNTLDH…	ATGGTCACTGATATCACACACCGTGGTCACTTTTGCAGCATTTACTCCGAAGATATACATAGTGAGGATTATTTGTATACAGGGGGCTTGATCAGTGACAGGCACGGCATTTTGTGGGCACAGCCAGTTACCATATTCCAAAGCCGAGACACAATGAAGTCGCAGCAGCAGCAGCCAGAGTTGCAGAAGAATGGAAGTGTGAGCCCTAGCAAGCTGTCAGAGAAACAGTTCAAACGTGGGAAGGAGGCCGGTAGATATAGAGGTGTCCGCAGGCGTCCATGGGGTCGTTTTGCCGCAGAAATTCGTGATCCCAAAACCAAAGAACGTCGGTGGCTTGGAACCTTCGACACCGCCGAGGAAGCAGCATATGCTTATGATTTCGCTGCAACAGTCATGAGG…
PITA_38160	APFE030730185.1	C4953887:17567-18154(+)	MCGPEANLISLNGSLRVTPRDFNTSSESFKPSNNIFHFNHEFSSGGENEATPLKDFEQPVFLFGRNINSKVKPLYSPKHDSPLLSAENDENSSAKSSGRKRKALYRGITQRRWGKWAAQIRDPRKGITVWLGTFNMAEEAAKAYDVEAKKIRGKKAKLNFPDD*	ATGTGTGGACCTGAAGCGAATCTCATTTCCCTCAACGGATCTCTGCGTGTAACTCCCAGGGATTTCAATACGTCGTCGGAATCTTTCAAGCCCAGCAACAATATTTTCCACTTCAACCATGAATTTTCTTCAGGTGGTGAAAATGAGGCTACTCCTCTCAAGGATTTCGAACAGCCTGTTTTTTTATTTGGTCGGAATATAAACAGCAAAGTGAAACCTTTATATTCACCAAAGCATGACTCTCCTCTGCTAAGTGCTGAAAATGACGAAAATTCCTCGGCCAAAAGCAGCGGGAGGAAGAGGAAAGCTTTGTACAGAGGTATCACGCAGCGTCGATGGGGAAAATGGGCTGCACAGATTCGAGATCCAAGAAAGGGCATTACGGTTTGGCTTGGAACG…
PITA_38405	APFE031165448.1	scaffold89382:87997-90282(+)	MENKTDQSVAGQKRWGTEKQTITVTTRFAKEDDITGQHITASSCQEVPSIVTLPQQQGRIGQAEMNFKRKELNPQNPPQKRHYRGVRQRPWGKWAAEIRDPKKAARVWLGTFETAEDAGRAYDDAALKFRGSKAKLNFPERINLLDEDLTGMNIPKQETPEIADLAIQVARATSSLSLPTNGGNLSAAPDDRRSLHVESVNGEAYSDRLHQVIPRHFIPADSTTSSQFSDVYHYGQPLQNLLFDCQQVNSNPSFVTQYSAYIRSQQQPELLNQQLACKASIQNEKALDYNRQVQITSGPNLASSNYTGARVSIFNNYVLQQQQDMFIHQQQVQSVSPSGYEDLYNFRERIIDQTSGNLLTSALSESESYDNLDYNSGVLPARNLNGPDL*	ATGGAGAATAAGACAGATCAATCCGTAGCCGGGCAGAAGAGATGGGGGACGGAGAAGCAGACGATCACAGTCACAACGCGTTTCGCCAAAGAGGACGATATTACTGGTCAGCACATTACTGCTTCATCCTGCCAAGAAGTACCAAGCATCGTCACGCTACCTCAGCAGCAAGGACGAATTGGACAAGCTGAGATGAACTTTAAGAGAAAGGAACTGAATCCACAGAATCCACCTCAAAAGAGACATTATAGAGGAGTAAGGCAAAGACCGTGGGGCAAATGGGCTGCAGAGATTCGAGATCCAAAGAAGGCAGCTCGAGTATGGCTGGGCACGTTTGAGACTGCAGAAGATGCTGGTAGAGCATACGACGATGCTGCTTTAAAGTTTCGAGGGTCAAAG…
PITA_38441	APFE031700610.1	super4018:89739-91369(-)	MWMEEFYFTVFLHDNGSQAMERNACLELHSALSFASSNLQNAKAEEFYPIHLTKVAIDIPLHALSSGVLCSNPISFGEESMKAAESDIRQSRLETSQNSESNPCSTSSLVHLYEFMRRPSYNSTVNIINPDVANRQLYYPMAASCQLTPSQIHFQLLQRQVDEIEQLQWFPSAIADPKPELAQRSSTMDHLGWRPWPMKHPAKRGLKPCSNQPTKLYRGVRQRHWGKWVVEIRLPRNRNRLWLGTYDTAEDAALAYDRAAYRLRGEYARLNFPGLKHQLQLSHDTDRPTPSSTSSQDSITAISNQSGQFSAQRTSVAAKLQEICERLSASNKPSHGEMLGHNFLNQNYHGDTFQGEFTHWGEIRKS*	TCAGGACTTTCTGATTTCACCCCAATGAGTGAATTCTCCTTGGAAGGTATCACCGTGATAGTTTTGATTCAAAAAATTATGGCCCAACATTTCTCCATGTGATGGCTTATTGGATGCAGATAAACGTTCACAGATTTCTTGCAGTTTAGCAGCTACAGAAGTTCGCTGAGCAGAAAACTGTCCAGATTGATTGCTAATGGCTGTAATTGAATCCTGACTGGATGTAGAGGATGGGGTTGGCCTATCAGTATCATGACTCAATTGCAGTTGATGTTTTAAACCTGGAAAATTCAAGCGAGCATACTCACCTCTTAACCTGTAAGCAGCCCTGTCATAGGCCAATGCTGCATCCTCTGCTGTATCATAAGTCCCAAGCCAAAGCCTGTTTCTGTTTCTGGG…
PITA_38619	APFE030991060.1	scaffold110780:75862-76735(-)	MVQSERHQNVQDSDRECHLQPKADICKASKKSSRGAEGLRQYRGVRMRSWGSWVSEIRAPHHHQKTRIWLGSYSTAEAAARAYDAAVLCLKGSSATLNFPESATIIKPPQSCQPPLMSPRSIQKVAAAAAYGYPSAAIDLAGSNGVDSVVQSLQASLDSNVKTEVGTETTQNANNNYAMPL*	TTATAATGGCATAGCATAGTTATTGTTAGCATTTTGGGTCGTTTCAGTACCAACCTCTGTTTTCACATTGGAGTCTAAAGAAGCTTGCAGGCTTTGAACAACAGAGTCAACACCATTAGAGCCTGCAAGATCAATAGCAGCACTAGGATATCCATAGGCAGCTGCAGCTGCAACTTTCTGTATAGACCTCGGAGACATCAATGGTGGCTGGCAGCTCTGGGGAGGTTTAATAATGGTGGCAGATTCTGGGAAATTGAGGGTAGCAGAGGAGCCCTTGAGACAGAGTACAGCTGCATCATAAGCTCTCGCAGCGGCCTCTGCAGTGGAATATGAACCCAACCATATTCTTGTTTTCTGATGGTGATGGGGTGCCCTTATTTCAGAGACCCACGATCCCCA…
PITA_38867	APFE031664248.1	C5103181:78770-80296(+)	MPQSDLDSAACDNDGGSYIEPTNTEEQSNAMAVVDGGGRSLIPQACHTEGRTSVVGDPNANSMGERLRKYRGVKRSNRKWTAQASNRKHDPKKSKKPVYLGTFPTAEMAAVAYDAAVLVLRGESRANRLNFPEYSPHIKSIVEGFSPSDIANNMKYVASKAAKNIAHLLSLENKDSQQAMDEGFEVYAAMPTAAISSSSASLMSSNIGMPHSIHTADFPVVRPAGVKQRIKVVARAAGRERQIRRKIYDDKQDSGISCFSVMQEPQHEWSTPVGIAKNNVNNEKIHPGQSSSNTLGCAADSGISSFSFAYDPLHESSVHEPKFPISNPNSMPKRVQSFAELIDIAKDPYMP*	ATGCCGCAAAGCGATTTGGACTCTGCTGCTTGTGATAATGATGGAGGTTCATATATTGAACCCACTAACACTGAAGAACAAAGCAACGCTATGGCTGTTGTTGATGGTGGTGGCAGATCTTTGATTCCACAGGCCTGTCATACAGAAGGGCGTACCAGTGTTGTTGGAGATCCTAATGCCAACAGTATGGGTGAACGATTACGGAAATACAGAGGTGTGAAGCGTAGTAATAGAAAATGGACGGCACAAGCTAGTAATCGAAAACACGATCCTAAGAAATCGAAAAAGCCGGTCTATCTTGGAACTTTTCCCACAGCAGAGATGGCTGCTGTTGCGTACGACGCAGCAGTCTTGGTCCTAAGGGGCGAGTCACGTGCCAATCGTCTGAACTTTCCAGAG…
PITA_39167	APFE030088714.1	scaffold43601:59934-60572(+)	MSDGEDFCKTNSNNKTWQMKRVRRSAARHSLYVGVRKRDWGSWVSEIRVPGKRARIWLGSYSSPEMAACAHDVAAFALRGHSAILNFPHLLQYLPRPPSSSSKDIKTAAAAAAAKITLILSNLSFDQSRNPTETNYETVGDNTTEESSSIAVNFNPTADLMSKQYACPVVGRLRPSAPLEMSENHEDRLIINSVSSPKKIEFDLPTPHVEEQM	ATGTCGGACGGAGAGGATTTCTGCAAGACCAACAGCAATAATAAGACATGGCAGATGAAGAGAGTAAGAAGATCAGCTGCAAGGCATTCACTTTATGTTGGTGTAAGAAAGCGTGACTGGGGAAGCTGGGTCTCCGAAATTAGGGTTCCTGGAAAGCGGGCCAGGATCTGGCTGGGCTCTTATTCTTCCCCAGAAATGGCAGCTTGTGCCCATGATGTTGCAGCTTTCGCTTTGAGGGGCCACTCTGCTATTCTCAATTTCCCCCACTTGCTTCAGTACTTGCCTCGCCCTCCCTCATCTTCGTCCAAAGACATTAAAACTGCTGCTGCTGCAGCAGCAGCAAAAATTACTTTAATATTGAGTAACCTTTCATTTGACCAGAGCAGAAACCCTACTGAG…
PITA_39291	APFE030927317.1	C4164397:4509-6358(-)	MTSESVNNMNLVNCGKRAPDQSITTPEKSSATPPAHSKFRGVTKNRWTDRYQAHLWDGTWKKQGAKRNGKPGAYDSAERAAKAYDVAAIKFWGLTAKTNFPGRDYEKEMKEMEHMTNEELVGKLRRLQWCFRDTEQAWDSVEARPSIAGLADTEEEAAVAYDTAALKHWGPHKLVATNFDVRNYDLDQIRRPELCHSKREINTCTATASEPKSACPYKFNAHIHENNLRHHAAG*	TTATCCAGCAGCATGGTGGCGGAGATTGTTCTCATGAATGTGTGCATTGAATTTATATGGACAGGCGCTTTTGGGCTCGCTGGCAGTGGCAGTACAAGTATTGATCTCCCGCTTTGAATGACATAACTCCGGACGTCGAATTTGATCGAGATCGTAATTCCTGACGTCGAAATTAGTGGCAACCAGCTTGTGCGGCCCCCAGTGCTTAAGGGCCGCAGTATCATAAGCCACAGCAGCCTCCTCTTCTGTATCTGCTAACCCCGCGATACTTGGACGTGCCTCCACAGAATCCCAGGCTTGTTCTGTGTCACGAAAACACCACTGCAATCTCCTGAGCTTCCCCACCAGTTCTTCATTAGTCATGTGCTCCATCTCTTTCATCTCTTTTTCATAGTCCCT…
PITA_39628	APFE031475681.1	super3695:61949-63731(-)	MTSESVNNMNLVNCGKRAPDQSITTPEKSSATPPAHSKFRGVTKNRWTDRYQARLWDGTWKKQGAKRNGKPGAYDSAERAAKAYDVAAIKFWGLTAKTNFPGRDYEKEMKEMEHMTNEELVGKLRRLQWCFRDTEQAWDSVEARPSIAGLADTEEEAAVAYDTAALKHWGPHKLVATNFDVRNYDLDQIRRPELCHSKREINTCTATASEPKSACPYKFNAHIHEYNLRHHDAG*	TTATCCAGCATCATGGTGGCGGAGATTGTACTCATGAATGTGTGCATTGAATTTATATGGACAGGCGCTTTTGGGCTCGCTGGCAGTGGCAGTACAAGTATTGATCTCCCGCTTTGAATGACATAACTCCGGACGTCGAATTTGATCGAGATCGTAATTCCTGACGTCGAAATTAGTGGCAACCAGCTTGTGCGGCCCCCAGTGCTTAAGGGCCGCAGTATCATAAGCCACAGCAGCCTCCTCTTCTGTATCTGCTAACCCCGCGATACTTGGACGTGCCTCCACAGAATCCCAGGCTTGTTCTGTGTCACGAAAACACCACTGCAATCTCCTGAGCTTCCCCACCAGTTCTTCATTAGTCATGTGCTCCATCTCTTTCATCTCTTTTTCATAGTCCCT…
PITA_39653	APFE031200408.1	C4868075:3353-3940(+)	MCGPEANLISLNGSLRVTPRDFNTSSESFKPSNNIFHFNHEFSSGGENEAIPLKDFEQPVFLFGRNINSKVKPLYSPKHDSPLLSAENDENSSAKSSGRKRKTLYRGITQRRWGKWAAQIRDPRKGITVWLGTFNMAEEAAKAYDAEAKKIRGKKAKLNFPDD*	ATGTGTGGACCTGAAGCGAATCTCATTTCCCTCAACGGGTCTCTGCGTGTAACTCCCAGGGATTTCAATACGTCGTCGGAATCTTTCAAGCCCAGCAACAATATTTTCCACTTCAACCATGAATTTTCTTCAGGTGGTGAAAATGAGGCTATTCCTCTCAAGGATTTCGAACAGCCTGTTTTTTTATTTGGTCGGAATATAAACAGCAAAGTGAAACCTTTATATTCACCAAAGCATGACTCTCCTCTGCTAAGTGCTGAAAATGACGAAAATTCCTCGGCCAAAAGCAGCGGGAGGAAGAGGAAAACTTTGTACAGAGGTATCACGCAGCGTCGATGGGGAAAATGGGCTGCACAGATTCGAGATCCAAGAAAGGGCATTACGGTTTGGCTTGGAACG…
PITA_39684	APFE030643416.1	scaffold30047:120544-121119(+)	MTKPWQNQNRHNGTKSCAPKSRQFRGVRQRKWGKWVSEIRMPNSNGRIWLGSYDTQEKAARAYDFAVYCLRGSKVKLNFPDSPPEIPNGSFLSPAQIQAAAAKFAAEEFRPLSERGAASSSSRLNAECGIDGQQITAEQSSAFRVSVPLERLASSESLNVEDIPLLDVSVEDFGVFFQQSKTNGQGVSNYF*	ATGACCAAACCCTGGCAAAATCAGAACCGCCACAACGGTACCAAAAGCTGCGCACCGAAGTCGCGGCAGTTCAGGGGAGTCCGACAGAGAAAATGGGGGAAATGGGTGTCGGAAATTCGAATGCCTAATTCCAACGGCAGAATTTGGCTAGGCTCGTACGATACCCAAGAAAAGGCTGCCCGCGCCTACGACTTTGCTGTGTATTGCCTGAGAGGGTCCAAAGTTAAACTCAATTTTCCAGACTCCCCACCCGAAATTCCCAACGGTTCATTTCTATCGCCGGCGCAAATTCAGGCGGCCGCCGCCAAGTTCGCTGCCGAAGAATTCCGGCCACTTTCGGAACGCGGCGCGGCCTCCTCGTCGTCCCGTTTGAACGCGGAATGCGGCATTGACGGCCAA…
PITA_40018	APFE031735273.1	C4611803:1797-2948(-)	MTSESVNNMNLVNCGKRAPDQSITTPEKSSATPPAHSKFRGVTKNRWTDRYQARLWDGTWKKQGAKRNGKPGAYDSAERAAKAYDVAAIKFWGLTAKTNFPGRDYEKEMKEMEHMTNEELVGKLRSGVFVTQNKPGILWRHVQVSRGYQVFEKLSSNSNFNFIVKD*	CTAGTCTTTCACTATGAAATTGAAATTAGAATTAGAGGAGAGCTTTTCAAAAACCTGGTAACCCCGCGATACTTGGACGTGCCTCCACAGAATCCCGGGCTTGTTCTGTGTCACGAAAACACCACTCCTGAGCTTCCCCACCAGTTCTTCATTAGTCATGTGCTCCATCTCTTTCATCTCTTTTTCATAGTCCCTCCCTGGAAAGTTGGTTTTGGCAGTTAAACCCCAGAATTTAATCGCTGCAACATCGTAAGCTTTTGCTGCGCGTTCTGCCGAATCGTATGCACCTGGTTTACCATTTCGCTTGGCACCCTGCTTTTTCCAGGTACCGTCCCAAAGACGGGCTTGGTATCTATCCGTCCACCTATTTTTGGTGACCCCACGAAACTTAGAATGTGC…
PITA_40580	APFE030616617.1	scaffold123699:84417-102109(+)	MKGAEAFQVKQQPRERENGKRREISAMNYRGVRRRQWGKFTTKIRDPTMKGARVWLGTFNTAEEASHAYDRAAYRLRGARALLNFPLLRLQFRERIDHRYENRWLPLLAEAKVETTLVPPFDCEWVWHCHRLNPLHYAKDCERLHGKVLFTNSVPPAQRNYALDVTAKLCEDAYPNEPFSLDLDVFCSAKSKTTILVGAQERTLFTKNFMVV*	ATGAAAGGAGCAGAGGCGTTTCAGGTAAAGCAACAACCACGAGAGCGGGAGAATGGAAAGAGGAGAGAGATAAGTGCCATGAATTACAGAGGAGTGAGGCGGCGGCAGTGGGGAAAATTCACAACAAAAATCAGAGATCCCACCATGAAGGGTGCTCGGGTTTGGCTTGGAACTTTCAATACCGCTGAAGAGGCCTCTCACGCATATGACCGCGCTGCCTACAGACTCCGTGGAGCTCGGGCTCTTCTTAACTTCCCCCTCCTTCGCTTGCAATTCAGAGAAAGGATCGACCATAGGTATGAGAATCGCTGGCTTCCTTTGCTAGCCGAGGCCAAAGTTGAGACCACATTGGTTCCTCCTTTTGACTGTGAATGGGTGTGGCACTGCCACAGGCTTAAT…
PITA_40586	APFE030206862.1	scaffold82905:67379-68981(+)	MCGGAIIADFIAANQSRRIAARDFWPDFDTFYDLFFNGGAVSESMNKSGSFDDAYNRKNKTSKNIFNCKHEFSSGAGNEAIPPLKDFEKSSAKSTKRKRRNLYRGIRQRPWGKWAAEIRDPRKGIRVWLGTFNTAEEAAKAYDAEAKKIRGKKAKLNFADGSCFVKMDSSKKMSGKKVKSCTKTPNLLLGLNMNSEVIPDLLEDYFANSQMEPSLKDVYRWDLPVYGSDDMEYRYSEYLNPSAPFRSNSNESTVQSSEHGNLGQTLQQSCCCENCSPQTLQQSCCCENCSHNYSEVSNFMSTAYGDAANFEPVKSSLPEGYFDSDHSSSSFDGAQFPWAHQKKTSVFVDIIPPLHGVVKDRPVDTSVEVNSFALETLMEVNDGTECFAVDIPVEVNGGT…	ATGTGTGGAGGTGCCATAATTGCGGATTTCATTGCCGCGAACCAATCCCGGCGTATTGCTGCCAGGGATTTTTGGCCGGATTTCGATACCTTCTATGACTTGTTCTTCAATGGCGGAGCCGTGTCTGAATCCATGAATAAATCGGGCAGCTTCGACGACGCATACAATCGGAAGAATAAGACGAGCAAGAATATTTTCAACTGCAAGCATGAATTTTCTTCAGGTGCTGGAAATGAGGCCATTCCTCCTTTGAAGGATTTCGAAAAGTCCTCGGCCAAGAGCACCAAGAGGAAGAGGAGGAATTTGTACAGAGGTATCAGGCAGCGTCCATGGGGAAAATGGGCTGCCGAGATTCGAGATCCCAGAAAGGGCATTAGGGTTTGGCTTGGAACGTTCAAC…
PITA_40721	APFE030903268.1	super2566:237399-240292(-)	MSSSSLRNNTVKGKHVATEPQRRRKVRSRNHGCTTVVETLAKWQELNSQVESSKDGAKRLRKAPAKGSKKGCMKGKGGPDNGRCNYRGVRQRTWGKWVAEIREPNRGSRLWLGTFSSAEEAARAYDQAARVMYGSCARLNLPDISASKESSVTSTSTTRVTCQSQECSTSQQYEVSSEWKDSKIHSALDTDIGGQVPSSQSPGVDAVYEAGVEERNDDRISETDQRYGSEMCLGVEAAQSDLPSKVEISDVVPDSALDLPVKSETNECTLLHILVPKDEPQDADGKNAFDLSQATLLRFRDEPQADLPSAAVTGALSNSEVQTISIKGELNESAEPLDSFQDIQLQDLDEMFDPDELLNMMSGNDNKSELSEADTFNTLYFSSPWPQEQLLDGDVLPSC…	CTAATTGTAACTAGGAAAGATATCTTGAAACATCCTAGCATCCTGCATCCCCTGCAAACCACCAGTCAACATCGGCTCCGGAGAAAAAACTTGCCTTGTTCTAGTATCTTCAGTCTGGTAGCCTTGATTGTTGTATGGATATGGAAAGGAGGCGAAATGACCATCATCCAGAACCTTGGGATGCAGAGGCTGTCTATCATCCAATCTGACATGTTTGACAACATGATATTCGGATTGTTGGAAGCTATCTAAATTGAATGGTTGTAATTGACCAAGGTCTTTGAAATTTCTGTCATCCAGCTGAAGTTGTTCACCTTCGTCCAAAATAGGATTTTGGAGCAGCCTATTGTCCGGGCTCTGAATCTGCAAGTATTGCAGAGTTGGGCTAGACGAAGGATC…
PITA_40805	APFE030072974.1	C5125245:18604-21109(-)	MENKPDQSEAGQKRRGTAQQTITFTTHGVKENDITGHHITASSDQEGPSIVTLPHFQQRNRENETNFKRKELNPRNPPPKTHYRGVRQRPWGKWAAEIRDPKKAARVWLGTFETAEDAGRAYDDAALKFRGSRAKLNFPERINLQNEDPQGMNMPKQETAAIADIGIQVARATSCRSLPTNGDDLSAAPEGCRTLHVESISGETYSDRLHPGVPPPYFMQVESPCLSIFSDVYHHGQPMQNLGFDAEQANCNPSLVPQYSAYMRYQQKPEPFNQQLASMVSIQNEPALDYNGQLPSTSRPNLVSSNYTGSRVPMFNNYVQTQQLQQHMLIHQQQVPLFSTTGYEELYNFRERIVDHTSDNLLVCSPSQSESYDNLDYNSGVLPARNLKGPEH*	TCAATGTTCTGGGCCTTTCAAATTACGTGCAGGAAGAACTCCTGAATTGTAATCCAAATTATCGTAGGATTCAGATTGAGACGGAGAACAGACTAGCAAGTTGTCAGATGTGTGATCAACGATTCTTTCACGAAAGTTATACAGCTCCTCATACCCTGTGGTGCTAAATAGTGGGACCTGCTGTTGATGAATAAGCATATGTTGCTGCAGCTGCTGCGTCTGCACATAGTTATTGAACATGGGTACCCTCGAACCTGTGTAATTCGAAGAAACTAAATTAGGCCTACTTGTACTTGGCAGTTGTCCATTATAATCTAGGGCTGGCTCGTTTTGGATGGACACCATAGAAGCCAACTGCTGATTAAAGGGTTCTGGTTTCTGCTGATATCTCATATAAGC…
PITA_41122	APFE030081666.1	scaffold7570:14334-14918(-)	MLEWIRHHLLEAEDKIDMTDIGGTSSAISSYFSLAPEAMGSCQNSSEGLTSENNENHFTHQDCASSCSCSFSACPATRIAEAVKVMAPPLEVKNRKSGGKHYRGVRQRPWGKFAAEIRDPSKKGARVWLGTFHTAQEAALAYDRAAFKIRGTRAMVNFPLALASHSENVSAGGHMGRNKERGREEAGAVGENGC*	TTAGCATCCATTCTCTCCCACTGCCCCTGCTTCTTCTCTCCCTCTCTCCTTGTTGCGCCCCATGTGACCTCCGGCCGAGACATTTTCTGAATGGGAAGCGAGGGCGAGGGGAAAATTAACCATAGCCCTGGTTCCTCGGATCTTGAACGCAGCGCGGTCATATGCGAGAGCGGCCTCTTGGGCTGTGTGGAAAGTGCCCAGCCAAACTCTGGCCCCCTTCTTACTGGGATCTCTGATTTCTGCTGCGAATTTCCCCCATGGTCGCTGCCTCACCCCTCTGTAGTGCTTGCCACCACTCTTTCTATTCTTCACTTCAAGTGGCGGCGCCATTACCTTTACAGCCTCTGCTATTCTTGTAGCTGGGCATGCAGAAAAAGAACAAGAACAAGAAGAAGCACA…
PITA_41204	APFE030704099.1	C4695217:14883-15470(+)	MCGPEANLISLNGSLRVTPRDFNTSSESFKPSNNIFHFNHEFSSGGENEAIPLKDFEQPVFLFGRNINSKVKPLYSPKHDSPLLSAENDENSSAKSSGRKRKALYRGITQRRWGKWAAQIRDPRKGITVWLGTFNTAEEAAKAYDAEAKKIRGKKAKLNFPDD*	ATGTGTGGACCTGAAGCGAATCTCATTTCCCTCAACGGGTCTCTGCGTGTAACTCCCAGGGATTTCAATACGTCGTCGGAATCTTTCAAGCCCAGCAACAATATTTTCCACTTCAACCATGAATTTTCTTCAGGTGGTGAAAATGAGGCTATTCCTCTCAAGGATTTCGAACAGCCTGTTTTTTTATTTGGTCGGAATATAAACAGCAAAGTGAAACCTTTATATTCACCAAAGCATGACTCTCCTCTGCTAAGTGCTGAAAATGACGAAAATTCCTCGGCCAAAAGCAGCGGGAGGAAGAGGAAAGCTTTGTACAGAGGTATCACGCAGCGTCGATGGGGAAAATGGGCTGCACAGATTCGAGATCCAAGAAAGGGCATTACGGTTTGGCTTGGAACG…
PITA_41215	APFE031328143.1	scaffold181161:83450-83980(+)	MFPSHYTALALRRQMWRNPRESGQNHSQPPEEDRGKTLRQFKGIRMRKWGKWVSEIRMPRSRERIWLGSYKTAEQAARAYDAALYCLRGPNAKFNVPNSVPATPPESSLSHQQIQDAAAKYALNEIPLNFSSPDNMNKKNKWKEKPPSPSRWSLALETEWACDSGFQKLPSIDSEK*	ATGTTTCCCTCCCACTACACAGCGTTGGCATTGCGTCGCCAAATGTGGAGAAACCCCAGAGAGTCCGGACAGAACCATTCCCAGCCTCCAGAGGAAGATAGAGGAAAAACTTTACGCCAATTTAAGGGAATCCGAATGCGAAAATGGGGAAAGTGGGTGTCCGAAATTCGGATGCCGAGATCGAGGGAGAGGATCTGGCTAGGATCCTATAAAACTGCCGAGCAAGCCGCCCGTGCTTACGATGCCGCACTCTATTGCCTCAGAGGCCCAAATGCCAAATTCAATGTCCCCAATTCCGTGCCCGCCACTCCGCCTGAGTCTTCTCTTTCTCATCAGCAAATTCAGGATGCTGCCGCCAAATATGCCTTGAACGAAATCCCTTTGAATTTTTCCTCTCCG…
PITA_41238	APFE030553216.1	scaffold166901:174248-175738(-)	MCGGAIISDFIPAKRSRRATPRDLWPDFDTFADLFINGVALSESFNKLGSFDEAYKQKNTPSKNFLKSKHEFSSDDEIEAISAFKDFENPPFKDSKKCSAKSNKRKRRNLYRGIRQRPWGKWAAEIRDPRKGVRVWLGTFKTAEEAAKAYDAEAKKIRGKKAKLNFADHSCSVKMDSRKKMSGKKVKPCTKDINLLFGLNMNSEVKSSYSPKPDLLEDCSLQMDVRRSDLPAPFQSNSNASAVQSSEHSHASQTSQKSCSYIKPPVHGVIEDRPADTSIEVNGGTGSFAVETLMEINNGTECLAVDTPVEVNGGTECCKREDSIAQLEFCKGLSALESYLGLSESPNLNATMDESIEAANKTPSSFPYDDCFLKPWIYDDLLISGSVY*	TCAGTAAACTGAACCCGAGATTAGCAGATCGTCATAGATCCAAGGTTTGAGGAAACAATCATCATATGGAAAAGAGCTTGGAGTCTTATTAGCAGCTTCTATTGATTCATCCATGGTTGCATTCAAATTAGGACTCTCTGACAACCCTAGATATGATTCCAAGGCAGATAATCCTTTGCAAAATTCAAGCTGCGCGATGCTATCCTCTCTTTTGCAGCATTCTGTGCCACCATTGACTTCGACAGGGGTATCCACAGCCAAGCATTCCGTCCCATTGTTGATCTCCATCAATGTTTCCACAGCAAAACTTCCTGTCCCACCGTTGACCTCGATGGATGTATCCGCAGGTCTGTCTTCAATTACACCATGGACTGGGGGTTTTATGTAAGAGCACGATTT…
PITA_41382	APFE031205138.1	scaffold157952:17855-18601(+)	MQNRSRKRRSAESNNAQDSSQEESTVNNGDKQREKGVQGKRHPVYRGVRMRSWGKWVSEIREPRKKTRIWLGTFRTPEMAARAHDVAALSVRGNSAFLNFPHLASSLPRPVTLSPRDIQRAAAASAADFHMPSGEYHNEDRSRDSVGTNSCGDTVMPAEPSIPKEAAAACVCDSAWISSFLSENESVIIDEDILFDLPNFLGSMAEALLVAPPWMLEPEVIYGSTCAADNFYDENGSIYVEISLWNYS*	ATGCAGAATAGGTCGCGCAAGCGTCGTTCAGCGGAAAGTAACAATGCACAGGATTCTAGCCAAGAGGAGTCCACAGTCAATAATGGAGATAAACAGCGGGAGAAGGGAGTTCAAGGAAAGCGGCACCCTGTTTACAGAGGCGTGAGAATGCGGTCTTGGGGTAAATGGGTGTCGGAGATTCGAGAGCCCAGGAAGAAAACCAGAATTTGGTTGGGGACGTTCCGGACGCCAGAGATGGCGGCTCGAGCCCACGACGTGGCGGCTCTCAGCGTCAGGGGGAACTCGGCTTTTCTCAATTTTCCCCACCTCGCCTCTTCGTTGCCTCGCCCCGTCACATTGTCACCCAGGGACATCCAGAGGGCCGCGGCGGCCTCTGCGGCTGACTTTCACATGCCTTCA…
PITA_41413	APFE031706912.1	scaffold227162:90703-91290(-)	MCRPEANLISLNGSLPVTPRDFNTSSESFKPSNNIFHFNHEFSSGGENEAIPLKDFEQPVFLFGRNINSKVKPLYSPKHDSPLLSAENDENSSAKSSGRKRKTLYRGITQRRWGKWAAQIRDPRKGITVWLGTFNTAEEAAKAYDAEAKKIRGKKAKLNFPDD*	TTAGTCGTCAGGAAAGTTCAGCTTCGCTTTCTTTCCTCTGATCTTTTTAGCCTCTGCATCATACGCCTTGGCGGCTTCCTCTGCCGTATTAAACGTTCCAAGCCAAACCGTAATGCCCTTTCTTGGATCTCGAATCTGTGCAGCCCATTTTCCCCATCGACGCTGCGTGATACCTCTGTACAAAGTTTTCCTCTTCCTCCCGCTGCTTTTGGCCGAGGAATTTTCGTCATTTTCAGCACTTAGCAGAGGAGAGTCATGCTTTGGTGAATATAAAGGTTTCACTTTGCTGTTTATATTCCGACCAAATAAAAAAACAGGCTGTTCGAAATCCTTGAGAGGAATAGCCTCATTTTCACCACCTGAAGAAAATTCATGGTTGAAGTGGAAAATATTGTTGCT…
PITA_41955	APFE030975763.1	C4486405:10404-11784(-)	MAPTRGDKDGKGKSGPTGTVAKNVKYIGVRYRSPGRYGAVIRDEVWKRDVWLGTFNSTEEAARAYDAAARHLKGKSAKTNFTGPQLDPVPEMTCHNQSYNIQRNSTTLDSPPAALDRRSPLNCVPADFNAHHAHRLHAAIRSADTIRQPKLNIVNGGVGAQGMADPGIRIFEKL*	TCATAACTTTTCAAATATTCTTATGCCGGGGTCCGCCATTCCCTGCGCTCCCACGCCTCCATTAACGATATTGAGCTTCGGTTGTCTGATTGTATCAGCAGATCTGATAGCTGCGTGAAGTCGATGGGCGTGATGGGCGTTAAAGTCAGCGGGGACACAGTTAAGTGGACTCCGCCTATCCAGAGCGGCCGGCGGAGAATCAAGTGTAGTGCTGTTCCTTTGAATGTTGTAGCTCTGGTTGTGACAAGTCATTTCTGGTACAGGGTCAAGCTGGGGACCGGTGAAATTAGTTTTGGCTGATTTCCCCTTTAGATGTCTCGCTGCAGCATCGTATGCTCTAGCAGCTTCCTCAGTGCTGTTAAATGTACCGAGCCACACATCTCTTTTCCACACTTCATC…
PITA_42024	APFE031490630.1	super3102:376320-377480(+)	MTTQSARVRVTRPARRMEVNQRRGKPGRDGVEILEECRLRNGEMEEFDTFGNLRLYIYEGNGRCNKILGVRSAMPGKWKSEIRCGGRQRISLGTFGRAEQAARAYDAACLALRGNSAVRNFPRLRKLLPQSRSQDPKDIKEAAKQATSETVSASLSLAETLAASGDIEEQEQQSTTSASFSLAETAAGAYDSACLALKGDDAVLNFQYLVNLFPPSCSRNTNDIKETAREAAVVVSIRADTVAVSEHIE*	ATGACAACCCAAAGCGCAAGGGTTCGAGTTACACGCCCTGCTCGCAGGATGGAGGTGAATCAGAGGAGAGGAAAACCTGGACGCGACGGAGTTGAAATACTGGAGGAGTGCAGGTTGCGAAATGGCGAAATGGAAGAGTTCGATACCTTCGGAAACCTCCGCCTATACATTTACGAAGGAAATGGACGGTGTAACAAAATATTGGGTGTGCGTTCTGCAATGCCTGGAAAATGGAAGTCTGAAATTCGATGTGGTGGCCGTCAACGGATCAGCCTGGGTACTTTTGGTCGAGCAGAACAGGCAGCCAGAGCGTACGACGCTGCTTGCTTGGCTCTGAGAGGGAACTCTGCAGTGCGAAATTTTCCGCGTTTAAGAAAGTTATTGCCACAATCGCGTTCT…
PITA_42051	APFE031446111.1	C4982535:33338-38218(-)	MKRIAADGESQSCFVSGSGSTKPRVKRVRRCVPKDKSQNATPGRRSSVYRGVTRHRWTGRYEAHLWDKNCWNQGQNKKGRQVYLGAYDDEEAAAHTYDLAALKYWGTETILNFPLNTYAKELEEMQSVSKEEYLASLRRRSSGFSRGVSKYRGVARHHHNGRWEARIGRVLGNKYLYLGTFSTQEEAARAYDMAAIEYRGLNAVTNFDLSRYMSRLRPAKDIINSDGDDVVVSNGDDSGSSLLVPAGVPIETSNNTDDDNMSSLLLLQQPPQLSWTPPQLEEKESSSAAPEDPTDDLDHLFSQSSKFKEIMEIRSSGHGHGHKVPGVELEDLHNVETANFAEDLEMFFSNSSNMLGSDAELSLNVDSPGSAMNNNMFCQPDHLHLQMPFDMHDLCSGEF…	TCAGGAACAAGTCCTGACTGCAAAATTAGGAAAAGAAGAGATGGGATCTATCAACGGATATTCAAGTTCGGGCTGTTGGCCGTGGTGGTCCAGATCCAGGAATTCGCCGCTACAAAGGTCATGCATGTCGAAGGGCATTTGAAGGTGCAGGTGATCTGGTTGGCAAAACATATTATTGTTCATGGCAGAGCCGGGAGAATCCACGTTAAGTGACAACTCCGCATCGGAGCCCAGCATATTGCTCGAGTTAGAGAAGAACATCTCCAGATCTTCTGCGAAATTAGCGGTTTCCACATTGTGCAAATCTTCTAATTCGACTCCCGGCACCTTGTGGCCGTGGCCGTGGCCACTACTCCTAATTTCCATAATCTCCTTGAATTTTGATGACTGACTAAAAAG…
PITA_42265	APFE031516458.1	C5128977:93733-95266(+)	MPQSDLDSAACDNDGGSYIEPTNTEEQSNAMAVVDGGVRSLIPQACHTEGRTSVVGDPNANSMGERLRKYRGVKLTNRKWRAQASYRKNDPEKSKKSVHLGTFPTAEMAAVAYDAAVLVLRGESRANRLNFPEYSPHIKSIVEGFSPSDIASNMKYVASKAAKNIAHLLSLENKDSQQEDEGFEVSAAMPAAAISSSSASLMSSNIGMPHSIHTADFPVVRPAGVKQRIKVVARAAGRERQIRRKIYDDKQDSGISCFSVMQEPEHECSTPVGIAKINVNNEKIHPGQSSSNTLGCAADSGISSFSFAYDPLHESSVHEPKFPISNPNSMPKRVQSFAELIDIAKDPYMP*	ATGCCGCAAAGCGATTTGGACTCTGCTGCTTGTGATAATGATGGAGGTTCATATATTGAACCCACTAACACTGAAGAACAAAGCAACGCTATGGCTGTTGTTGATGGTGGTGTCAGATCTCTGATTCCACAGGCCTGTCATACAGAAGGTCGTACTAGTGTTGTTGGAGATCCTAATGCCAACAGTATGGGTGAACGATTACGGAAATACAGAGGTGTGAAGCTTACTAATAGAAAATGGAGGGCACAAGCTAGTTATCGAAAAAACGATCCTGAGAAATCGAAAAAGTCGGTCCATCTTGGAACTTTTCCGACAGCAGAGATGGCTGCAGTTGCCTACGACGCAGCAGTCTTGGTCCTAAGGGGCGAGTCACGTGCCAATCGTCTGAACTTTCCAGAG…
PITA_42370	APFE030804638.1	scaffold112187:5046-5650(-)	MQTETEMPTSAVKPSRPSLSVSVSVPRLESLCWEKFSVGWGCRNSLGVTPPSLSPCLSAAWAKLPLNENDSGGILKEAANKGWMHVMPKEETPMETKKQADVFPVKKEPENFPAKKETDVRQETRTQQPVAKKKNVGRHYRGVRQRPWGKFAAEIRDSARQGARVWLGTFNTGEEAALAYDRAAYKIRGSKALLNFPLHVA*	TAAGCAACGTGGAGCGGGAAATTAAGCAAGGCCTTAGAACCCCGTATCTTGTAAGCGGCACGGTCATAGGCGAGAGCCGCCTCCTCCCCGGTATTGAAGGTGCCGAGCCAAACTCTAGCCCCCTGCCGTGCAGAGTCCCTTATCTCCGCTGCGAACTTCCCCCACGGCCGCTGCCGCACGCCCCTGTAATGCCTACCAACGTTCTTTTTCTTCGCCACCGGCTGCTGTGTTCGCGTTTCTTGACGGACATCGGTCTCTTTCTTGGCGGGAAAATTTTCGGGTTCTTTCTTGACGGGAAAAACATCGGCTTGCTTCTTCGTTTCCATCGGCGTCTCCTCCTTGGGCATTACATGCATCCATCCCTTGTTGGCGGCCTCTTTGAGAATCCCACCCGAATCG…
PITA_42417	APFE031630306.1	scaffold130871:33058-36813(-)	MEAAALLAMAPEANESSLSKRVGGLKRISRGSTAKERISKMPPCAAGKRSSIYRGVTRHRWTGRYEAHLWDKSTWNQNQNKKGKQVYLGAYDEEEAAARAYDLAALKYWGPGTLINFPVSDYARDIDEMQSVSREDYLATLRRKSSGFSRGMSKYCRMARSSQNGRWEPRFSRTAIDNRYFNMANYCEDVQQVTAYPMSLGDQRSFSAAKSIDLSAYIRWWKPKKMHDHVQVVVTESVNVEEPEMLEWQGKPCEPYQLPSLGVSHSRQQKPSSTSALSILFKSPLFNQMFERASSANNQDNIVKVGLKKEQMNSISQGKDRIGYNESGHGLGSFQLSVQIGTTKVPSLSALSNARPCSKSHIHTMERT*	TCAAGTTCTCTCCATGGTATGTATATGGGATTTACTGCATGGTCTTGCATTGCTAAGTGCTGATAAAGAGGGAACTTTAGTTGTACCTATTTGAACAGAAAGCTGGAAAGATCCCAAGCCATGTCCTGATTCATTATATCCAATTCTGTCTTTTCCTTGGCTGATTGAATTCATTTGCTCTTTCTTCAATCCCACCTTAACAATGTTATCTTGGTTGTTTGCAGATGATGCTCTTTCAAACATTTGGTTGAACAAAGGAGACTTAAACAAGATGCTAAGAGCGCTTGTTGAAGAAGGCTTTTGCTGTCTGCTGTGAGAAACACCGAGAGAAGGCAATTGGTATGGTTCACATGGCTTTCCTTGCCATTCTAGCATCTCTGGCTCTTCCACATTCACAGA…
PITA_42485	APFE030818255.1	C4341653:617-1378(+)	MEMEMNPYEREDSSFDWAESAMEIRAGESTNMLEFIRHHLLDDVEDDLDIEDAVDHHPPQNYTSSSSVSISPAVITSATATATATASRLCQNYSCKSTSEDNHNELTQQFSSTSSVSAVIRRAEAVNVKVKPQPREEQSGEMKQMSGARHYRGVRQRPWGKFAAEIRDPAKKGTRVWLGTFITAEEAALAYDRAAFRMRGARALVNFPLALNSSTENESAVDHMAHKRKRSKEETAEGGAACSRRSRGDGSGS*	ATGGAAATGGAAATGAATCCATATGAACGTGAAGATTCCAGCTTTGATTGGGCAGAGAGCGCGATGGAGATTAGAGCAGGGGAGAGCACCAATATGTTGGAGTTCATTCGTCACCATTTGCTGGATGATGTGGAGGATGATTTAGATATTGAAGATGCAGTGGATCATCACCCACCACAAAATTACACATCATCATCTTCAGTATCCATTTCCCCAGCAGTCATCACCAGCGCCACTGCCACCGCCACCGCCACCGCCAGCCGCTTGTGCCAAAATTACAGCTGTAAATCCACATCAGAAGACAATCACAATGAACTCACACAACAGTTTTCTTCTACTTCTTCTGTATCCGCAGTTATAAGAAGAGCAGAGGCGGTAAATGTGAAGGTAAAGCCACAG…
PITA_42507	APFE030663488.1	scaffold215780:30718-31173(-)	MNLAMEGEQFTEENQDDEVGNAMMKEFNSSVHTRVPERMASVTSLVSRSGGEFDAFEDLRRYSMLVEQAVKLPSSQYKGVVPQPNSRWGVQIYGKHQHVWLGTFNKEEDAARAYDRVALKFRG*	TCAACCCCGGAACTTGAGAGCCACGCGATCATAGGCCCTGGCGGCATCCTCTTCCTTGTTGAAAGTTCCCAACCAGACGTGTTGGTGTTTCCCATAAATTTGTACACCCCATCGACTGTTGGGTTGCGGAACCACGCCCTTGTACTGCGACGAAGGCAGCTTCACAGCTTGCTCCACCAACATTGAATACCTTCTCAGATCCTCAAATGCGTCAAACTCTCCCCCAGATCTGGACACCAAGCTCGTTACGCTTGCCATTCTCTCCGGCACGCGAGTGTGCACAGAAGAGTTGAATTCTTTCATCATTGCGTTGCCCACTTCATCGTCTTGGTTTTCTTCAGTGAACTGCTCACCCTCCATTGCCAGGTTCAT
PITA_42702	APFE031223596.1	C4059003:5170-6975(-)	MTSESVNNMNLVNCGKRAPDQSITTPEKSSATPPAHSKFRGVTKNRWTDRYQARLWDGTWKKQGAKRNGKPGAYDSAERAAKAYDVAAIKFWGLTAKTNFPGRDYEKEMKEMEHMTNEELVGKLRSVRYKKKESMIISVLVFTDTEEEAAVAYDTAALKHWGPHKLVVTNFDVRNYDLDQIRRPELCHSKREINTCTATASEPKSACPYKFNPHIHENNLRHHAVG*	TTATCCAACAGCATGGTGGCGGAGATTGTTCTCATGAATGTGTGGATTGAATTTATATGGGCAGGCGCTTTTGGGCTCGCTGGCAGTGGCAGTACAAGTATTGATCTCCCGCTTTGAATGACATAACTCCGGACGTCGAATTTGATCGAGATCGTAATTCCTGACGTCGAAATTAGTGACAACCAGCTTGTGCGGCCCCCAGTGCTTAAGGGCCGCAGTATCATAAGCCACAGCAGCCTCCTCTTCTGTATCTGTGAAAACCAAAACAGATATTATCATACTTTCTTTTTTTTTGTATCTTACACTCCTGAGCTTCCCCACCAGTTCTTCATTAGTCATGTGCTCCATCTCTTTCATCTCTTTTTCATAGTCCCTCCCTGGAAAGTTGGTTTTGGCAGT…
PITA_42996	APFE030777174.1	scaffold128607:174608-220369(+)	GFAQVGCKFLSLKGIGNIGIMVSLEAWGKMEGGQVAGMGVADEVKEQQLKEGNESDLLKGMKKARRERGSTAKERISKMPPCAAGKRSSIYRGVTRHRWTGRYEAHLWDKSTWNQNQNKKGKQVYLGAYDEEEAAARAYDLAALKYWGPGTLINFPVSDYARDIEEMQSISREDFLASLRRKSSGFSRGMSKYRGLAKQSQTGKWEASFGRVLGNRYFSMGSCSTSEEAAAAYEMSQGEYRGFGVVRNIDLSSYIRWWQPNKLLEVEPSAPRHMDESHSISEERHTQGEEPETPQWPGQACEPYQLPSLGVPNNGKHNPSPVTALSVLHQSSSFKQMLEKASAKKGKSDQDINANDNPENIQLEKGKGKIFLAEDTTGSKEFAYQPSGQTSTIFPFAQV…	GGATTTGCTCAAGTCGGTTGTAAGTTTTTGAGCCTAAAAGGTATTGGAAACATTGGAATAATGGTCAGTTTAGAGGCTTGGGGGAAGATGGAGGGCGGGCAAGTAGCAGGAATGGGGGTTGCAGACGAAGTGAAGGAACAACAGCTAAAAGAAGGCAATGAGAGTGATCTCCTCAAGGGAATGAAGAAGGCAAGGCGTGAGAGAGGATCAACAGCAAAGGAACGGATTAGTAAAATGCCTCCCTGTGCTGCTGGAAAACGGAGTTCTATCTACAGAGGCGTCACAAGGCATAGATGGACAGGACGATATGAAGCTCATCTTTGGGACAAAAGTACTTGGAACCAGAACCAAAATAAAAAGGGCAAGCAAGTGTACCTAGGTGCCTATGATGAGGAGGAG…
PITA_43386	APFE030847160.1	scaffold89092:72597-73687(+)	MEQQQQVPQSERLLENVWARIAAEVLSEEDSAGSQVMSDHDDKEVNNSLRVHETLGTMSSTKSLNYESNSSNGEKKDQIRWNIASIQGDMDMNVSDDCSKAVMSTHEFNDFLERLPSLRRWLSIESEALNSMQDDEAKLQCYTKRQDANQRRSQTQETTVAARLKIQKERRAASQPAKHYRGVRRRPWGKFAAEIRDSSREGARMWLGTFETAEEAALAYDKAALKMRGVRTFLNFPLHVVEEALSQELKTNYVSLPALKSPGRSDDGTSMCRKRLGESLSETSQPPSKQINLQWYGLDENALRAVSNKDISADSQAMVELQNPTETDFEEWLRNTTEGSGGAPYVTGQ*	ATGGAACAGCAGCAACAGGTTCCCCAGTCAGAGAGGCTTCTGGAAAATGTATGGGCTCGCATCGCCGCAGAAGTCCTGTCCGAAGAAGATTCGGCGGGGTCTCAAGTGATGTCAGATCATGATGATAAAGAGGTAAACAATTCTCTCCGCGTTCACGAGACCCTGGGAACAATGAGTTCAACGAAGTCCCTAAATTATGAGTCAAACAGTAGTAATGGAGAGAAGAAGGACCAAATTAGATGGAACATCGCATCAATTCAGGGGGATATGGACATGAATGTCTCAGACGATTGTTCGAAAGCTGTAATGAGTACGCACGAATTCAACGATTTTTTGGAAAGGCTGCCGAGCCTTCGGCGATGGTTGAGCATAGAATCCGAAGCTCTTAATTCCATGCAG…
PITA_43404	APFE030081666.1	scaffold7570:14334-14867(-)	MTDIGGTSSAISSYFSLAPEAMGSCQNSSEGLTSENNENHFTHQDCASSCSCSFSACPATRIAEAVKVMAPPLEVKNRKSGGKHYRGVRQRPWGKFAAEIRDPSKKGARVWLGTFHTAQEAALAYDRAAFKIRGTRAMVNFPLALASHSENVSAGGHMGRNKERGREEAGAVGENGC*	TTAGCATCCATTCTCTCCCACTGCCCCTGCTTCTTCTCTCCCTCTCTCCTTGTTGCGCCCCATGTGACCTCCGGCCGAGACATTTTCTGAATGGGAAGCGAGGGCGAGGGGAAAATTAACCATAGCCCTGGTTCCTCGGATCTTGAACGCAGCGCGGTCATATGCGAGAGCGGCCTCTTGGGCTGTGTGGAAAGTGCCCAGCCAAACTCTGGCCCCCTTCTTACTGGGATCTCTGATTTCTGCTGCGAATTTCCCCCATGGTCGCTGCCTCACCCCTCTGTAGTGCTTGCCACCACTCTTTCTATTCTTCACTTCAAGTGGCGGCGCCATTACCTTTACAGCCTCTGCTATTCTTGTAGCTGGGCATGCAGAAAAAGAACAAGAACAAGAAGAAGCACA…
PITA_43652	APFE031106475.1	super3593:7576-9022(+)	MCGGAIISDFIIPPASRGRRVTARDIWPDFDKFSEFINGGAAVESFDVSVDVDDDEEDSDDDEFLDFEESYQNKKKKQQQPISPTKGFELPLARGLDGPAAKSAVRKRKNLYRGIRQRPWGKWAAEIRDPRKGARVWLGTFNTAEEAARAYDAAARKIRGKKAKVNFVDEPPPSVKKESNNAKGSKKGSSKKIKSYTTPKADFFEGFKTAKPSIAQYNFHQKFPNPSCDDLGYQNPLSPLHAICNRNFVAKQSSSALPAYSTEFSDFDDSEVDNLVPQPASFEPMKNINKRKGYNSFESDTSCVSADRSHISWVTEVKTPEISSVPKAEADSDQYDFVDMSTPVATSVSAGSPEVQLPPFNNGLNKSPSVEDGVAVEKSPKLEESSQLEISEDLPSLES…	ATGTGTGGAGGTGCTATCATCTCGGACTTTATAATACCCCCTGCGAGCCGAGGCCGCCGGGTGACTGCCAGGGATATATGGCCCGATTTTGATAAGTTCTCTGAGTTTATTAATGGAGGTGCTGCGGTGGAGTCCTTTGATGTCAGCGTTGATGTCGATGACGACGAGGAGGATTCCGACGATGACGAGTTCCTCGATTTTGAGGAGAGCTATCAGAACAAGAAGAAGAAGCAGCAACAGCCGATATCCCCCACCAAGGGTTTCGAGCTTCCTTTAGCTCGGGGTCTTGATGGACCGGCGGCCAAGAGCGCGGTGAGAAagaggaagaatttgtacagagggatcaggcaacgtccatgggggaaatgggctgcagagatcagggatcccagaaaaggc…
PITA_43679	APFE031679110.1	C4333115:1190-2338(-)	MTTQSARVRVTRPARRMEVNQRRGKPGRDGVEILEECRLRNGEMEEFDTFGNLRLYIYEGNGRCNKILGVRSAMPGKWKSEIRCGGRQRISLGTFGRAEQAARAYDAACLALRGNSAVRNFPRLRKLLPQSRSQDPKDIKEAAKQATSETVSASLSLAETLAASGDIEEQEQQSTTSASFSLAETAAGAYDSACLALKGDDAVLNFQYLINLFPPSCSRNTNDIKETARQVVHLFCRKKNDAYSF*	CTAAAAAGAATACGCATCGTTCTTCTTTCGACAAAATAAATGAACGACTTGTCTAGCTGTCTCTTTTATGTCGTTGGTGTTCCGAGAGCACGATGGTGGGAATAAATTTATTAAATACTGGAAATTTAGCACTGCATCGTCTCCTTTCAGAGCTAGACAAGCACTGTCGTAGGCTCCGGCTGCGGTTTCTGCCAGTGAAAACGATGCACTGGTAGTGCTCTGTTGTTCTTGTTCTTCAATATCCCCCGATGCAGCTAAGGTTTCTGCCAACGAAAGCGATGCACTAACTGTTTCAGATGTTGCTTGTTTAGCTGCCTCTTTTATATCTTTGGGGTCCTGAGAACGCGATTGTGGCAATAACTTTCTTAAACGCGGAAAATTTCGCACTGCAGAGTTCCC…
PITA_43769	APFE031294462.1	scaffold37668:34570-35843(+)	MAAAIDIPLHALSSGVLCSDPISFGEESMEAAESDIKQSRLETTQNSESNPGSTSSLVDLYEFMRRPCYNSTVNIIDPDVANRQLYYVGSGMSSNFCNLYSELIPNENSDGRDSLSCPCPSFGGLECNTNQQQFVNFLVGNQSELQPMATNCQLTPSQIHFQLLQRQVDRSSSSNGFHLLLQIQNQKWHNGAVAEIRLPRNRNRLWLGTFDTAEDAALAYDRAAYRLRGEYARLNFPGLRHQLQLSHDTDRPTPSSTSNQDSITAISNQSGQFSALQTSVDAKLQAICERLSASNKPSHEEMLGHNFLNQKTITVTPSKENSLIEVKSESPDICNCEGDKTSVITALNSNSEMPCRSVIDVLSTMLSISASASLSASFNME*	ATGGCAGCAGCTATAGATATACCTCTGCATGCTCTGAGTTCTGGGGTTTTGTGCTCTGATCCTATATCATTTGGAGAAGAATCTATGGAAGCTGCTGAATCAGATATCAAACAATCAAGATTAGAGACAACTCAGAACTCTGAATCAAATCCTGGTTCAACTTCCTCTCTTGTGGATCTTTATGAGTTTATGAGAAGGCCTTGTTATAACTCTACTGTGAATATCATCGATCCAGATGTAGCAAATCGTCAGTTGTATTATGTAGGTTCAGGCATGTCATCTAACTTCTGCAATTTATATTCAGAATTAATCCCCAATGAAAATAGTGATGGTAGAGATAGTCTGTCGTGTCCATGCCCGAGTTTTGGAGGGCTAGAATGCAACACTAACCAACAGCAG…
PITA_43933	APFE030914707.1	scaffold105836:44507-46036(-)	MPQSDLDSAACDNDGGSYIEPTNTEEQSNTMAVVDSGGRSLIPQASHREGRTSVVGDPNANSMGERLPKYRGVKRSNRKWTAQASNRKNDPEKSKKSVHLGTFPTAEMAAVAYDAAVLVLRGESRANRLNFPEYSPHIKSIVEGFSPSDIANNMKYEAWKAAKNIAHLLSLENKDSQQAKDEGFEVSAAMPAAAISSSSASLMSSNIGMPHSVHTADFPVLRPAGVKQRIKVVARAAGRARQERRKIYDDKQDSGISCFSVMQEPEHQCSTPVGIAKNNVYNEKIHPGQSSSNTLGCPADSGISNFSFAYDQLHESTVHEPKFPISNPNSMPKRVQSFDELIDIAKDPYMH*	CTAGTGCATGTAAGGGTCCTTCGCTATGTCGATTAACTCATCGAAACTCTGCACTCTTTTGGGCATAGAATTTGGATTTGAGATTGGAAATTTAGGCTCATGTACAGTGGACTCATGGAGCTGGTCATACGCGAATGAGAAATTGGAAATGCCACTATCTGCTGGGCAGCCTAACGTATTACTGCTTGATTGTCCAGGGTGGATCTTCTCATTATACACATTATTTTTTGCAATGCCCACCGGAGTACTGCACTGGTGTTCAGGCTCCTGCATGACCGAGAAACAGCTGATACCGCTATCTTGTTTATCATCGTAGATTTTTCTTCTTTCTTGGCGCGCTCTTCCTGCAGCACGGGCGACCACCTTGATACGTTGCTTTACTCCCGCTGGCCGTAGTAC…
PITA_44206	APFE030179412.1	super2135:49002-49856(+)	LQRPTSYSIFCTKVMDNGIAFVPEAMLTPSQYAEAITKSAATGKGGIKRIRRQQEAAPSPPEEATLNQQSPPYRGVRRRNWGKWVSEIQEPKKKTRIWLGSFDTPEMAARAHDVAAFHLKGKKRALLNFPDLIDHLPRPISLSARDIQAAAAEAAVAFHSGSAENSGRSNDEYKRARRSPRKLSVCNESAVTCSLDELSAISSSDIEIASGEVSGQTDFFNNSSSVLCRPTEGICEWTAMDDCFEYFSLYTDLAEALMLPPPPLHSTEEVDAEEQKLEEGFLWPD	CTGCAGCGTCCTACCTCCTACTCCATTTTCTGTACAAAAGTCATGGATAATGGAATCGCTTTTGTTCCCGAGGCTATGCTCACTCCCTCACAATACGCAGAAGCAATCACCAAATCTGCAGCCACAGGTAAGGGCGGGATCAAGAGGATTCGTAGGCAACAGGAGGCTGCCCCTTCGCCGCCAGAGGAGGCAACTTTGAATCAGCAAAGTCCACCGTACAGAGGCGTGCGTCGTCGCAACTGGGGGAAATGGGTGTCTGAAATTCAAGAACCGAAAAAGAAAACCCGAATCTGGCTCGGCTCCTTCGACACCCCAGAGATGGCCGCTCGAGCTCACGACGTCGCTGCATTCCACTTGAAGGGCAAGAAGCGCGCGTTGCTCAATTTTCCAGATCTGATT…
PITA_44360	APFE031343858.1	scaffold76281:519981-545916(+)	MVKPSSNQTSRNRHGNCSLKSQLFKGIRMRKWGKWVSEIRVPNSKGRIWLGSYDAPEKAARAYDFAVYCLRGPEAKFNFPDFLPEISDASSLSLSQIQAAAAKFAAEKFHLPSEDKATFSWSCSKGESSIESEEISVEQDPAFWDSVLEDIDSWDPITLDDFALIDGIWLGSCDTLEKVARAHDFVVYCLRGSKAKLNFPDSVPKISDASSLYSWQIQAAATKFTAKESRLPSEDNATFYTSCSKGDLSIEDQDISVEQDLEFGIQFSKISTTSRNRPGNCSLKSQQFKGIRMRKWGRWVSEIRIPNSKGKIWLGSYDVPEKAARAYDFAVYCLRGPEAKFNFPDSLPEIPDASSLSPSQIQAGAAKFATEEFHLPSEDNAPFSWSCSKDECSIEVEEI…	ATGGTAAAACCTTCTTCAAATCAGACCAGTCGCAACAGGCACGGAAACTGCTCACTGAAGTCGCAGCTGTTCAAGGGAATTCGAATGAGAAAATGGGGGAAATGGGTGTCGGAAATTCGAGTGCCCAATTCCAAGGGAAGAATTTGGCTGGGCTCCTACGATGCCCCGGAAAAGGCTGCCCGCGCCTACGATTTTGCCGTCTACTGCCTGAGAGGACCGGAGGCCAAGTTCAATTTTCCCGACTTCTTACCGGAAATTTCCGACGCCTCTTCTCTATCACTGTCGCAAATTCAAGCCGCTGCAGCCAAGTTCGCCGCAGAAAAATTCCATCTGCCTTCGGAAGATAAGGCGACGTTCTCTTGGTCCTGTTCGAAAGGCGAGTCGAGCATTGAAAGCGAA…
PITA_44447	APFE031717088.1	super973:323413-335894(-)	MTKPSQNQNRRNRRENRSRKSRQFKGTRMRKWGKWVSEIRMPHSTRRIWLGSYDTPEMAARAYDFGVYCLRGSKGKFNFPHSLPEISCASSLSPPQIQAAAAKYAAGEFPLPSEDAAFSISHTEVECRNDGQEMSAFWDSVPEDMDNVESLTLEDFPPLDNRRNRRENRSRKSRQFKGIRMRKWGKWVSEIRMPHSSCRIWLGSYDTPEMAARAYDFAVYCLRGSKGKFNFPHSLPEISCASSLSPPQIQAAAAKYAAGEFPLPSEDAAFSISHTAVECRNNGQEMSAFWDSVPEDMDNVESLTLEDFPPLDVPMDDFEVLFPMMENWGSGAF*	TTAGAAAGCCCCACTGCCCCAGTTTTCCATCATCGGGAACAGAACCTCAAAATCATCCATAGGCACATCCAATGGTGGAAAATCCTCTAAAGTTAGAGACTCGACATTATCCATATCTTCAGGAACAGAGTCCCAAAATGCTGACATCTCTTGGCCGTTATTCCTACATTCCACTGCCGTATGGGAAATTGAGAACGCCGCGTCTTCAGAGGGAAGCGGGAATTCTCCTGCGGCGTACTTGGCGGCGGCAGCTTGAATTTGCGGCGGTGATAGAGATGAAGCGCAGGAGATTTCAGGCAGAGAGTGGGGAAAATTGAACTTGCCTTTCGATCCCCTGAGACAATACACCGCAAAATCGTATGCGCGGGCAGCCATTTCCGGCGTGTCATAGGAGCCGAG…
PITA_44750	APFE030848804.1	scaffold131261:9995-14763(+)	MASANNWLDVSPSDNLTVDMQGSGGRQGGHDQNQSASRNNMLVTSNFPHLGTSNFPHMGIGYSNTDAHQELPSKSIPLTLERTDGSALRHNAGYMETLGAPDNGGFQSDQLDETQGYNNLEQTQKSGNNIYGPSSDVMRFMANNCQAGSDEMNQMSNAANSFLSSAITTPAVTTATAKVQLGPRAMHDDVNYMNVNWCGMNQAAEDRSKQNNNTTNTGEVEGAIALRPNIMQNLSNNHNQANANDSNILSGYGLQIPQGSVSDVYGIPNVNWVVRNQASEEANMNNTTNFPAHVTAVVATTSTAKETSSNGDSPSSGGSKKRALEDAITPFESAVPIQSRAADQSLGHRTSIYRGVTRHRWTGRYEAHLWDNTSRRENQTRKGRQGGYDQEEKAARAYD…	ATGGCATCAGCTAATAATTGGCTGGACGTTTCTCCTTCAGATAATCTAACTGTGGATATGCAGGGATCAGGTGGTCGCCAAGGTGGCCATGATCAGAACCAGTCAGCTTCTAGAAACAACATGTTGGTTACATCCAATTTTCCTCACCTGGGTACATCCAATTTTCCTCACATGGGTATAGGATACAGTAACACCGATGCCCATCAAGAGCTCCCTTCAAAATCAATCCCGTTAACACTGGAAAGAACAGATGGAAGTGCATTGCGGCATAATGCAGGTTACATGGAAACCCTCGGTGCACCCGACAATGGAGGTTTTCAGTCTGATCAGCTTGACGAAACTCAAGGCTACAACAATCTCGAGCAGACTCAGAAATCTGGGAACAATATTTATGGGCCA…
PITA_44753	APFE030231339.1	C3980337:402-1046(-)	MEKSSRQEHDHAHAREDEDREQKCRQFKGIRLRKWGSWVAETRMPKCRQKLWLGSYTSAQQAARAYDAAVYCLRGPNAKFNFPNSVPDIPSASSISRRQIQLAAAKYAMEQFPSSAPSLQNFNSKAMEEAASPSREVPVSETELGSQSHEISEEGALDSEGSYEGHVSMSLNLQRMSSIEEVSALELICSIFQQHEQEEEHMNLSIDPTELWNF*	tcaaaagttccacaattccgtggggtcgatggaaaggttcatgtgctcctcctcttgctcatgctgctggaaaatactgcaaataagttccaacgccgaaacctcctcaatcgatgacattctctgcaaattcaggctcatgctcacgtgcccttcataactgccctctgaatccaacgccccttcctctgatatttcatgactttggctccccaactccgtttctgaaaccggaacctctcttgacggagatgcggcctcctccatcgccttactattaaaattctgcagagagggcgcactcgaagggaattgttccatggcatatttggcagccgcgagttgaatctggcggcgggaaatagaagacgcagagggaatgtcgggaacagaattggg…
PITA_44782	APFE031503697.1	scaffold162735:16538-23854(+)	MEKAPEEQEHHPNVLRGEGFRQKRAQFKGIRLRKWGRWGSEIRVPKSRANIWLGSYEAPPAPMMLQLSAVPNIEKAPEEQEHHPNVLRGEAFRQKRPQFKGIRLRKWGRWGSEIRVPKSRANIWLGSYETAEQAARAYDAAAYCLRGPSTEFNFPGSIPSIPSAFSLSRHEIQLAAAKYARDELPSTSPYTHNNNNGVSLASSCRSSKISEKELCSKREQISLERGAS*	ATGGAGAAAGCCCCAGAAGAACAAGAACACCATCCAAATGTTCTAAGAGGTGAAGGTTTCAGACAAAAACGCGCCCAATTTAAGGGAATCCGCCTGCGAAAGTGGGGTCGTTGGGGATCCGAAATCCGGGTGCCCAAAAGCAGAGCGAATATATGGCTCGGCTCTTACGAAGCTCCGCCCGCGCCTATGATGCTGCAGCTGTCTGCGGTGCCAAATATCGAGAAAGCCCCAGAAGAACAAGAACACCATCCAAATGTTCTAAGAGGTGAAGCTTTCAGACAAAAACGCCCCCAATTTAAGGGAATCCGCCTGCGAAAGTGGGGTCGTTGGGGATCCGAAATCCGGGTGCCCAAAAGCAGAGCGAATATATGGCTCGGCTCTTACGAAACGGCGGAGCAA…
PITA_44823	APFE031165448.1	scaffold89382:9696-11969(-)	MGDGVAGQKRWGTEKQTITVTTRFAKEDDITGQHITASSCQVPSIVTLPQHQGRIGQAEMNFKRKELNPQNPPQKRHYRGVRQRPWGKWAAEIRDPKKAARVWLGTFETAEDAGRAYDDAALKFRGSKAKLNFPERINLLDEDLTGMHIPKQETPEIADFAIEVARATSSLSLPTNGGNLSAAPDDRRSLHVESVNGEAYYDRLHQLIPRHFIPADSTTSSQFSDVYRYGQQLQNLLFDCQQVNSNPSFVTQYSAYIRSQQQPELLNQQLASTASIENETALDCNRQVQITSGPNLASSNYTGARVSVFNNYVLQQQQDMFIHQQQVQSVSPSGYEDLYSFRERIIDQTSGNLLTSALSQSESYDNLDYNSGVLPARNLNGPDL*	TCAAAGATCTGGGCCGTTCAAATTACGTGCAGGAAGAACTCCTGAATTGTAATCCAAATTATCGTATGATTCAGACTGAGACAGAGCAGAGGTTAGCAAGTTGCCGGATGTCTGGTCGATGATTCTTTCACGAAAGCTATATAAGTCCTCATAGCCGCTGGGGCTTACTGATTGGACTTGCTGTTGATGAATAAACATATCTTGTTGCTGCTGCAGCACATAGTTATTAAAGACGGATACTCTTGCACCTGTGTAATTCGATGAAGCTAAATTAGGTCCGCTTGTAATTTGCACTTGTCGATTACAATCCAGGGCCGTTTCGTTTTCGATGGACGCCGTAGAAGCCAACTGCTGGTTTAAAAGTTCTGGTTGCTGCTGAGATCTTATATAAGCTGAATA…
PITA_45092	APFE030884552.1	C4120151:4309-6158(-)	MTSESVNNMNLVNRGKRAPDQSITTPEKSSATPPAHSKFRGVTKNRWTDRYQARLWDGTWKKQGAKRNGKPGAYDSAERAAKAYDVAAIKFWGLTAKTNFPGRDYEKEMKEMEHMTNEELVGKLRRLQWCFRDTEQAWDSVEARPSIAGLPDTEEEAAVAYDTAALKHWGPHKLVATNFDVRNYDLDQIRRPELCHSKREINTCTATASEPKSACPYKFNPHIHENNLRHHAVG*	TTATCCAACAGCATGGTGGCGGAGATTGTTCTCATGAATGTGTGGATTGAATTTATATGGGCAGGCGCTTTTGGGCTCGCTGGCAGTGGCAGTACAAGTATTGATCTCCCGCTTTGAATGACATAACTCCGGACGTCGAATTTGATCGAGATCGTAATTCCTGACGTCGAAATTAGTGGCAACCAGCTTGTGCGGCCCCCAGTGCTTAAGGGCCGCAGTATCATAAGCCACAGCAGCCTCCTCTTCTGTATCTGGTAACCCCGCGATACTTGGACGTGCCTCCACAGAATCCCAGGCTTGTTCTGTGTCACGAAAACACCACTGCAATCTCCTGAGCTTCCCCACCAGTTCTTCATTAGTCATGTGCTCCATCTCTTTCATCTCTTTTTCATAGTCCCT…
PITA_45859	APFE030973726.1	scaffold7674:2721-3536(-)	MAIYSTKQERELCTEMSVLDRIRSHLLEDFEGKDEESSFCAKTGNIPSYNRNSSPEVESFIQSALACESVDGNRPEIEMETEMPTTAVEPSRPLLSVSVPRLDSLGWEKFSAGGGHRNSLGVTPPSVSLCLSDAWAKLRLNENNSEDMVLYGILKETANEGWMPVTHKEEMAMETKKEADVFPVKKEADVRHETRTQQPVAKKKNVGRHYRGVRQRSPGKFTAEIRDSARQPAKVWLGTFNTAEEAALAYDRAAYKMRGSKALLNFPLDVA*	TTAAGCAACATCGAGCGGGAAATTAAGCAAGGCCTTAGAACCCCGCATCTTGTAAGCGGCACGGTCATAAGCGAGAGCTGCCTCCTCCGCGGTATTGAAGGTGCCAAGCCAAACTTTAGCCGGCTGCCGTGCAGAGTCCCTTATCTCCGCTGTGAACTTCCCCGGCGACCGCTGCCGCACGCCCCTGTAATGCCTACCAACGTTCTTCTTCTTCGCCACCGGCTGCTGTGTTCGCGTTTCATGACGGACATCGGCCTCTTTCTTGACGGGAAAAACATCGGCTTCCTTTTTCGTTTCCATCGCCATCTCCTCCTTGTGCGTTACAGGCATCCATCCCTCGTTGGCGGTCTCTTTGAGAATCCCGTACAAGACCATGTCCTCCGAATTGTTTTCGTTTAA…
PITA_45922	APFE031442164.1	C4190181:8081-8810(-)	METTYDIMKPRNCENGCYVVSISLHNGKLVIHCETSPEKLDDQFDLAEFKAPEDLCAKFRRPSTQLEDRVRDSDATGLYFIGFLFMLFCLWLGFERAENEAIPPLKDFEKLRPKGKWAAEIRDPRKGIVVWLGTLNTTEEAAKAYDAEAKKIIGEKVKLDFPDHSCFVKVDTSQKMSGMKVKPCTEQPVLLFGGNINSKVKHLYSPKPDLSKGYS*	CTAAGAGTAACCTTTTGATAAATCAGGCTTTGGTGAATATAAATGTTTTACCTTACTGTTTATATTCCCACCAAATAATAAAACAGGCTGTTCTGTACACGGCTTTACTTTCATCCCTGACATTTTCTGGCTAGTGTCCACTTTTACAAAACACGAGTGATCCGGAAAGTCGAGTTTCACTTTCTCGCCTATGATCTTTTTAGCCTCTGCATCATACGCCTTGGCGGCCTCCTCTGTCGTATTAAGCGTTCCAAGCCAAACCACAATGCCCTTTCTTGGATCTCGAATCTCCGCAGCCCATTTTCCCTTTGGACGCAGCTTTTCGAAATCCTTCAGAGGAGGAATCGCTTCATTTTCAGCACGTTCAAAACCCAACCAGAGGCAAAATAACATAAAAAG…
PITA_46065	APFE030408061.1	scaffold144812:154537-155254(-)	MKDGKKNVIYIPPILHNLIETETAMEITAGQSLSMNMSMLELIRHHLLEVEDEMDIMHLYHPGGNDTSSSSSSVSSPRDSWEYLHGPATATASGSCQKRSPSEDNESSQYSSASTSVSTDTRKREAVNINAKPQPREEQSVEKNNGIHYRGVRKRPWGKFAAEIRDPARKGARVWLGTFVNAEEAGLAYDRAAFRIRGAKAVLNFPLAFASISENGSAIGHMGNKRKRGNGETAEEWAAY	ATGCCGCCCACTCCTCGGCCGTTTCTCCGTTCCCTCTCTTCCTTTTGTTTCCCATGTGACCTATGGCCGATCCGTTCTCTGAAATGGAAGCGAAAGCTAGGGGGAAATTAAGGACGGCCTTGGCTCCGCGGATCCTGAAGGCGGCCCGGTCATATGCGAGTCCGGCCTCTTCGGCGTTGACGAAAGTGCCGAGCCAAACCCTGGCCCCCTTCCTGGCGGGGTCCCTGATTTCAGCTGCGAATTTACCCCATGGTCGCTTCCTCACTCCTCTGTAGTGAATTCCATTGTTCTTTTCCACACTCTGCTCCTCCCGTGGCTGTGGCTTCGCATTTATATTTACCGCCTCTCTTTTTCTTGTGTCTGTGGATACAGAAGTAGAAGCAGAAGAGTATTGTGAAC…
PITA_46155	APFE031298980.1	scaffold41106:8044-9192(-)	MTTQSARVRVTRPARRMEVNQRRGKPGRDGVEILEECRLRNGEMEEFDTFGNLRLYIYEGNGRCNKILGVRSAMPGKWKSEIRCGGRQRISLGTFGRAEQAARAYDAACLALRGNSAVRNFPRLRKLLPQSRSQDPKDIKEAAKQATSETVSASLSLAETLAASGDIEEQEQQSTTSASFSLAETAAGAYDSACLALKGDDAVLNFQYLINLFPPSCSRNTNDIKETARQVVHLFCRKKNDAYSF*	CTAAAAAGAATACGCATCGTTCTTCTTTCGACAAAATAAATGAACGACTTGTCTAGCTGTCTCTTTTATGTCGTTGGTGTTCCGAGAGCACGATGGTGGGAATAAATTTATTAAATACTGGAAATTTAGCACTGCATCGTCTCCTTTCAGAGCTAGACAAGCACTGTCGTAGGCTCCGGCTGCGGTTTCTGCCAGTGAAAACGATGCACTGGTAGTGCTCTGTTGTTCTTGTTCTTCAATATCCCCCGATGCAGCTAAGGTTTCTGCCAACGAAAGCGATGCACTAACTGTTTCAGATGTTGCTTGTTTAGCTGCCTCTTTTATATCTTTGGGGTCCTGAGAACGCGATTGTGGCAATAACTTTCTTAAACGCGGAAAATTTCGCACTGCAGAGTTCCC…
PITA_46332	APFE031078582.1	scaffold60469:31280-32752(+)	MRRKGEAIAESRERVRSRKERAPLMDSNGQNSDDQCITNVHERIAGMRRGFSSEEEMSMIVSALSYVGRGTGERTDFQGPGNRENIYCFSHDTDTSGSGFKRSKSGEVEVAAVEEDIKSTAFSPTNNSAEAKMDEGCGVASENSTRITDTETKCGPTPQSLESGCTKKKRYRGVRQRPWGKWASEIRDPKRAARVWLGTFDTAEDAARAYDTAAIKFRGARAKLNFPDEAIARNQAFTDLESQSNVVVTVTATSHPPPPPPPTNINNINFPPNFMPTSLVDSINPHDSAFFNFPPSLHPLRLSPSQFPSLSGESSQQAFPRFPSPYNPVDSSISSTWINAWNINDLGTQRAMDHTELVDNSSTTLSSALNLLITNRQGMNSVTSVYNNEARYFDSVGVV…	ATGCGCAGAAAGGGGGAAGCAATAGCAGAGTCGAGAGAGAGAGTTAGGAGCAGAAAGGAGAGGGCACCATTAATGGATAGCAATGGCCAAAATTCAGATGATCAGTGCATCACAAATGTGCACGAGAGGATTGCAGGAATGAGGCGCGGATTTAGCTCGGAGGAAGAAATGTCTATGATTGTTTCTGCGCTTTCTTACGTTGGAAGGGGAACAGGGGAGCGGACAGATTTCCAGGGGCCAGGGAACCGGGAAAATATCTACTGTTTCAGCCATGATACCGATACCAGTGGCAGTGGGTTCAAGAGGTCTAAATCAGGAGAAGTTGAAGTGGCGGCTGTTGAGGAGGATATTAAGAGTACAGCTTTCTCGCCCACTAACAATAGCGCAGAGGCGAAAATG…
PITA_46353	APFE031144181.1	C4542519:4980-5318(-)	MTKPSQNPSCSISPKSLSLKSRQFKGIRMRKWGKWVSEVRIPNSSGRIWLGSYDTPEKAARAYDFAMYCLRGSTAKLNFPHSPPKISCASFQSPPQIQAAAARFAAEEFQLP*	TTAAGGAAGTTGAAATTCTTCTGCAGCGAACCTCGCCGCCGCTGCTTGAATTTGCGGCGGCGATTGAAACGAAGCGCAAGAAATTTTGGGCGGTGAGTGGGGAAAATTGAGCTTGGCCGTGGATCCTCTGAGGCAGTACATAGCAAAGTCATATGCACGGGCAGCTTTTTCAGGGGTGTCGTAGGAGCCCAACCAAATTCTGCCACTGGAATTGGGAATTCGAACTTCCGACACCCATTTCCCCCATTTTCTCATGCGGATTCCCTTGAACTGCCGCGACTTCAGTGATAAGCTTTTGGGACTGATGCTGCAGCTCGGGTTTTGCGAGGGTTTAGTCAT
PITA_46383	APFE030276822.1	C5037849:36178-37711(+)	MPQSDLDSAACDNDGGSYIEPTNTEEQSNAMAVVDGGVRSLIPQACHTEGRTSVVGDPNANSMGERLRKYRGVKRTNRKWRAQASYRKNDPEKSKKSVHLGTFPTAEMAAVAYDAAVLVLRGESRANRLNFPEYSPHIKSIVEGFSPSDIASNMKYVASKAAKNIAHLLSLENKDSQQEDEGFEVSAAMPAAAISSSSASLMSSNIGMPHSIHTADFPVVRPAGVKQRIKVVARAAGRERQIRRKIYDDKQDSGISCFSVMQEPEHECSTPVGIAKINVNNEKIHPGQSSSNTLGCAADSGISSFSFAYDPLHESSVHEPKFPISNPNSMPKRVQSFDELIDISKDPYMP*	ATGCCGCAAAGCGATTTGGACTCTGCTGCTTGTGATAATGATGGAGGTTCATATATTGAACCCACTAACACTGAAGAACAAAGCAACGCTATGGCTGTTGTTGATGGTGGTGTCAGATCTCTGATTCCACAGGCCTGTCATACAGAAGGTCGTACCAGTGTTGTTGGAGATCCTAATGCCAACAGTATGGGTGAACGATTACGGAAATACAGAGGTGTGAAGCGTACTAATAGAAAATGGAGGGCACAAGCTAGTTATCGAAAAAACGATCCTGAGAAATCGAAAAAGTCGGTCCATCTTGGAACTTTTCCGACAGCAGAGATGGCTGCAGTTGCCTACGACGCAGCAGTCTTGGTCCTAAGGGGCGAGTCACGTGCCAATCGTCTGAACTTTCCAGAG…
PITA_46540	APFE031179308.1	super460:27296-28191(+)	MAPIDTNGDHNGESVSDANVNATSEEVHYRGVRKRSWGRYAAEIRDPTIKERRWLGTFDTSEEATKAYDKAARLLKGGKAKTNFAIPDSVDNQVHTTTTVRAQNQRCSSNPSSILPAVLFNHNMTSVRSAFCEEVKPWFYVNKEQIVVNKNYICYGLRAGNIHILNINTALRALLRGHLQRVTNMASFSNNVHLLASASSDGR	ATGGCTCCCATTGATACGAATGGAGATCACAATGGCGAGAGTGTCAGTGATGCAAATGTCAATGCAACGAGTGAAGAAGTGCATTACAGAGGAGTGAGAAAAAGGTCATGGGGTAGATATGCGGCGGAGATCAGAGATCCAACCATCAAGGAGCGAAGGTGGCTTGGCACCTTCGATACTAGCGAAGAAGCAACGAAGGCGTATGATAAAGCCGCAAGGCTTTTAAAAGGAGGAAAGGCCAAAACCAACTTTGCGATCCCTGACAGCGTCGACAACCAAGTCCACACCACCACCACTGTCCGCGCCCAGAACCAGAGGTGCAGTTCCAACCCTAGTAGCATACTTCCTGCCGTTTTGTTTAACCACAACATGACGTCCGTGAGATCAGCATTCTGTGAA…
PITA_47168	APFE031337383.1	scaffold139365:14239-14898(+)	MEKFSPQEDDHAHSPEEEVRGQKCRQFKGIRLRKWGSWVAEIRMPKSREKLWLGSYKKPEQAARAYDAAVYCLRGPNAKFNLPNSLPDIPSASSLSRRQIQLAAAKYALDQFHSSAPPLQNFNTKAMDEAASPSRPDPVSETELSSDSHQISEEGQLDLWESPIEVSGGNYEGRMNLNLERMPSIEEVSALEIIYSICQQHEEEEHINLFLDPTELWNF*	ATGGAGAAATTCTCTCCACAGGAGGATGACCATGCCCATTCTCCAGAAGAAGAAGTTCGCGGGCAAAAGTGCCGCCAATTTAAGGGAATCCGATTGCGAAAGTGGGGGAGCTGGGTAGCAGAAATTCGAATGCCCAAATCTCGAGAGAAGTTATGGCTGGGGTCATACAAAAAGCCCGAGCAGGCCGCCCGCGCCTACGACGCGGCAGTTTATTGTCTGAGAGGGCCGAACGCCAAATTCAATTTACCCAATTCTCTACCCGACATTCCGTCTGCGTCTTCTCTTTCCCGCCGGCAGATTCAACTCGCTGCTGCCAAATATGCGTTGGATCAATTCCATTCGAGTGCGCCCCCTCTGCAGAATTTTAATACTAAGGCCATGGACGAGGCCGCATCGCCG…
PITA_47647	APFE031131002.1	scaffold61249:35959-37860(-)	MCGSGVAVPVQGALCNLLKAVRNDSCDMGLRLGRCYSPMKDESSSNASQQESAWTAVCRKKAMAGDSTGRDNEEAGSVIEDDSNSLPALAGNSVCSNFSSFAGQTGLERMGSGISTVSSENTNIPSVQSQENSCKKLPSSQYKGVVPQPNGRWGAQIYEKHQRVWLGTFNHEDDAARAYDRAAIKFRGPDAITNFNFADIHPETVFLRGHSKYEIVDMLRKHTYDEELDQNKNTSHIDPEVARSNPLEPHEHLFDKTVTPSDVGKLNRLVIPKQHAEKYFPLDVVSAGSKGKGVLLSFEDGTDKTWRFRYSYWNSSQSYVLTKGWSRYVKEKHLQAGDIVTFERSTSSRHLFITFRRRPCSFLAPVAQPPVPNRCPQSVDPFAVAAYPHWAQLFYPAPP…	TTACTCCGACAATGCTGCCGCTGCCGCCTTCCGCTTCTTTGTATTTCCAGTGCCGTCTTCCTTGACTCCACTGCCCGGGAAAAGATTTAACGGCGACGGCTGGAGGTTTACTCCAAACAGCCGGACGGAAGAAGAAGAAAGAGAATCGCCGTCCGTGGACGGAGATGCCCTGTCGAGATTCACGAAGACCAGCGACGATGGATTTCCGTCATCTGACGCAGTCGGCTCGAGCGCCTTCGAATCATGGAAGTAGAGAAAATCGTGGCTGGCACGGCCCGGAATCGAACGTTGGGCAACGGCGTTGATTACCGGCGGTGCCGGGTAAAAAAGCTGCGCCCAGTGCGGATACGCGGCAACGGCAAAAGGGTCAACGGACTGCGGACAGCGGTTGGGAACCGG…
PITA_47861	APFE030344000.1	C4206133:7672-9480(-)	MTSESVNNMNLVNCGKRAPDQSITTPEKSSATPPAHSKFRGVTKNRWTDRYQARLWDGTWKKQGAKRNGKPGAYDSAERAAKAYDVAAIKFWGLTAKTNFPGRDYEKEMKEMEHMTNEELVGKLRRLQWCFRDTEQARDSVEARPSIAGLPVSDTKENESMIISVLVFTDTEEEAAVAYDTAAIKHWAPHKLVATNFDVKNYDLDQIRRPELCHSKREINTCTATASEPKSACPYKFNAHIHEYNLRHHDAG*	TTATCCAGCATCATGGTGGCGGAGATTGTACTCATGAATGTGTGCATTGAATTTATATGGACAGGCGCTTTTGGGCTCGCTGGCAGTGGCAGTACAAGTATTGATCTCCCGCTTTGAATGACATAACTCCGGACGTCGAATTTGATCGAGATCGTAATTCTTGACGTCGAAATTAGTGGCAACCAGCTTGTGCGGCGCCCAGTGCTTAATGGCCGCAGTATCATAAGCCACAGCAGCCTCCTCTTCTGTATCTGTGAAAACCAAAACAGATATTATCATACTTTCATTTTCTTTTGTATCTGACACTGGTAACCCCGCGATACTTGGACGTGCCTCCACAGAATCCCGGGCTTGTTCTGTGTCACGAAAACACCACTGCAATCTCCTGAGCTTCCCCAC…
PITA_47911	APFE030533601.1	scaffold77172:58694-59308(-)	FAAEIRDPMKKTRVWLGTFDTAEEAARAYDSAARALRGPKAKTNFALVPPCDDRSTSLSSTVESWSSPKNNTNNNTRKNLSLNKADGITHKIDLNIAQEEFGRKGSVPYLEDKILNISKKQKTFKRSCAPDRAAEAYNWSRQQYPQMGFDPNACHSDCDSSSSVVDDDEVGTSSLRPQGVRLLPDLNLPPCDDEEDFSSMLLHL*	TCAAAGATGCAATAACATGCTGCTGAAATCCTCTTCGTCATCGCAAGGTGGAAGATTCAAATCTGGTAATAACCTGACTCCCTGAGGCCTCAAGCTAGAAGTACCCACTTCATCATCATCAACAACAGATGAAGATGAATCACAATCACTATGACAGGCATTTGGGTCAAAACCCATTTGTGGATACTGCTGTCTGGACCAATTGTAGGCCTCCGCGGCCCTGTCTGGTGCACAGCTCCTTTTGAAGGTTTTCTGTTTCTTTGATATATTGAGGATCTTATCTTCTAAATATGGTACAGAACCCTTCCTGCCAAATTCCTCTTGCGCAATGTTCAGATCAATCTTATGTGTTATGCCATCTGCTTTATTCAACGATAGGTTTTTCCTTGTATTATTATT…
PITA_48037	APFE031706912.1	C5029479:44820-45407(+)	MCGPEANLISLNGSLRVTPRDFNTSSESFKPSNNIFHFNHEFSSGGENEAIPLKDFEQPVFLFGRNINSKVKPLYSPKHDSPLLSAENDENSSAKSSGRKRKTLYRGITQRRWGKWAAQIRDPRKGITVWLGTFNTAEEAAKAYDAEAKKIRGKKAKLNFPDD*	ATGTGTGGACCTGAAGCGAATCTCATTTCCCTCAACGGGTCTCTGCGTGTAACTCCCAGGGATTTCAATACGTCGTCGGAATCTTTCAAGCCCAGCAACAATATTTTCCACTTCAACCATGAATTTTCTTCAGGTGGTGAAAATGAGGCTATTCCTCTCAAGGATTTCGAACAGCCTGTTTTTTTATTTGGTCGGAATATAAACAGCAAAGTGAAACCTTTATATTCACCAAAGCATGACTCTCCTCTGCTAAGTGCTGAAAATGACGAAAATTCCTCGGCCAAAAGCAGCGGGAGGAAGAGGAAAACTTTGTACAGAGGTATCACGCAGCGTCGATGGGGAAAATGGGCTGCACAGATTCGAGATCCAAGAAAGGGCATTACGGTTTGGCTTGGAACG…
PITA_48410	APFE031679110.1	C3866039:1097-2245(-)	MTTQSARVRVTRPARRMEVNQRRGKPGRDGVEILEECRLRNGEMEEFDTFGNLRLYIYEGNGRCNKILGVRSAMPGKWKSEIRCGGRQRISLGTFGRAEQAARAYDAACLALRGNSAVRNFPRLRKLLPQSRSQDPKDIKEAAKQATSETVSASLSLAETLAASGDIEEQEQQSTTSASFSLAETAAGAYDSACLALKGDDAVLNFQYLINLFPPSCSRNTNDIKETARQVVHLFCRKKNDAYSF*	CTAAAAAGAATACGCATCGTTCTTCTTTCGACAAAATAAATGAACGACTTGTCTAGCTGTCTCTTTTATGTCGTTGGTGTTCCGAGAGCACGATGGTGGGAATAAATTTATTAAATACTGGAAATTTAGCACTGCATCGTCTCCTTTCAGAGCTAGACAAGCACTGTCGTAGGCTCCGGCTGCGGTTTCTGCCAGTGAAAACGATGCACTGGTAGTGCTCTGTTGTTCTTGTTCTTCAATATCCCCCGATGCAGCTAAGGTTTCTGCCAACGAAAGCGATGCACTAACTGTTTCAGATGTTGCTTGTTTAGCTGCCTCTTTTATATCTTTGGGGTCCTGAGAACGCGATTGTGGCAATAACTTTCTTAAACGCGGAAAATTTCGCACTGCAGAGTTCCC…
PITA_48723	APFE030828939.1	C4514953:2587-4392(+)	MTSESVNNMNLVNCGKRAPDQSITTPEKSSATPPAHSKFRGVTKNRWTDRYQARLWDGTWKKQGAKRNGKPGAYDSAERAAKAYDVAAIKFWGLTAKTNFPGRDYEKEMKEMEHMTNEELVGKLRSVRYKKKESMIISVLVFTDTEEEAAVAYDTAALKHWGPHKLVVTNFDVNNYDLDQIRRPELCHSKREINTCTATASEAKSACPYKFNPHIHENNLRHHAVG*	ATGACCTCTGAATCTGTCAACAACATGAATCTTGTAAACTGTGGAAAGAGGGCTCCCGATCAGAGTATCACTACTCCGGAGAAGAGTAGTGCTACCCCTCCTGCACATTCTAAGTTTCGTGGGGTCACCAAAAATAGGTGGACGGATAGATACCAAGCCCGTCTTTGGGACGGTACCTGGAAAAAGCAGGGTGCCAAGCGAAATGGTAAACCAGGTGCATACGATTCGGCAGAACGCGCAGCAAAAGCTTACGATGTTGCAGCGATTAAATTCTGGGGTTTAACTGCCAAAACCAACTTTCCAGGGAGGGACTATGAAAAAGAGATGAAAGAGATGGAGCACATGACTAATGAAGAACTGGTGGGGAAGCTCAGGAGTGTAAGATACAAAAAAAAAGAA…
PITA_48797	APFE031158437.1	scaffold1459:11107-22051(+)	MSDGADCSKSNSCKRTWQMKSVRRSAARHSLYVGVRKRKWGRLVSEIRVPGKRAMIWLGSYSSPEMAACAHDVAAFALRGHSAILNFPDFLHYFPRPPTSSSKDIKTTAAAAAAKISLILSNFSFQESRNNEGVRHSATDESSSVGQSFNPKADLMSKQYACTVVAKLYQQMTENHEDPLIMKSVCSPKHIEFNNPRFEEQILISKEGEEMLLWDFSVFRNIPGICNGLSSSVRIFKELSEVAKENYKFKLGELN*	ATGTCGGACGGAGCAGATTGCAGCAAGAGCAATAGCTGTAAAAGGACGTGGCAGATGAAGAGCGTCAGAAGATCAGCTGCAAGGCATTCACTATATGTCGGCGTAAGAAAGCGTAAGTGGGGAAGGTTGGTCTCCGAAATTAGGGTTCCTGGAAAGCGGGCGATGATCTGGCTGGGCTCTTATTCTTCCCCAGAAATGGCAGCTTGTGCACATGATGTCGCAGCTTTCGCTTTGAGGGGTCACTCCGCTATTCTCAATTTCCCCGACTTCCTTCACTACTTTCCCCGCCCTCCCACGTCTTCCTCAAAAGACATTAAAACCACTGCTGCTGCGGCAGCAGCAAAAATTAGTTTAATATTGAGCAACTTTTCATTTCAGGAGAGCAGAAACAACGAAGGT…
PITA_48806	APFE031510756.1	scaffold117344:111992-112684(+)	MVRSARNKDQMSMSKRQFKGVRMRRWGSWVSEIRAPTQKTRIWLGSYSTQEAAARAYDAALLCLKGRSASLNFPDSADLLIDLDVDLDRQFAISRRSIQIIAASAANRTPVNIKDIAAHHANNIAECSNRNTAFTDNGTLLIEASKNQTETKEEYSAAIFSDGHDYSQAIYCSSAWIDPDFGSFNQIHHDCDAAMELSSVDSPPAASFNNWMDEYNDHDQDFMCSLWSFT*	ATGGTTAGATCTGCACGCAATAAAGATCAGATGTCGATGTCGAAGAGACAGTTCAAGGGCGTGCGAATGAGACGCTGGGGGTCATGGGTTTCAGAGATTAGGGCTCCCACCCAGAAAACCCGTATTTGGTTGGGATCCTACTCCACGCAGGAGGCTGCTGCCCGTGCCTACGACGCAGCTCTCCTGTGTCTGAAAGGCAGGTCGGCTTCCTTAAACTTCCCCGATTCGGCTGACCTACTTATCGATCTTGATGTTGACCTAGACCGACAGTTCGCCATTTCGCGGCGGTCAATTCAGATAATAGCAGCATCTGCGGCCAATAGAACGCCAGTGAACATCAAGGATATTGCAGCCCACCATGCCAATAATATTGCAGAATGCAGTAATAGAAACACAGCT…
PITA_49095	APFE031445506.1	scaffold175881:89987-94191(-)	MSSCEAPAEISSKWDLNLTPAAPDEYVLAVNPNFLRLPQEVKAISSKAEESGSVCDETSINPAVAVAKPELETWTSGTVEVSFIRKAENCRDDSGTSNSSVVNAPPINNTRKNDGSLSLECEDSANQVIESRSRSSNDINNLGQSKTVSSKLFGCFMTVNAPAASEINTDSKSQQDTRITHQFSVVNRAPDSASSLPLEEIRGPVNQFSRSLWSDHLASSQTDSSGTPNPPTVLIQPVKKSRRGPRSRSSQYRGVTFYRRTGRWESHIWDCGKQVYLGGFDTAHAAARAYDRAAIKFRGQDADINFNLSDYEDDLKQLNNLTKEEFVHILRRQSNGFSRGSSKYRGVTLHKCGRWEARMGQFLGKKYIYLGLFDNEIEAARAYDQAAIRCNGREAVTNF…	TCAGCGGTCTTTGACCCCGAATGAACGACCATCTCCAACCACTCCTTTCAAGGACTTCGAACCAACTGTATCTTTGGAAGAGCACAGTTCAGCTTTTGATTTCGTTGATAAATTTAAGCCCAAACCCAAGACTTGTCCACTTAAGCTGGCTTGAATGCTATGTAAGTTCTGTCTCTGAGATGCAGACTTAGGAGCTGAAAGCTGAGTAGTACCCATAGACTGAGCACCTTGTAACTTGTGGAGCCAATCTGAAGGATGAGCTACAGTGATTTGAGCTTGGGGTGAGAATCCTGATGATGCTGCTGCCAACATTGAAGCAGATGACCCATTAGTATAAAGTTTCCAAGGCCAACTTGATTGATGTTCAATAGAAGAAGAGAGGGGAGAGGAGAGGCCACT…
PITA_49133	APFE031615887.1	scaffold119559:15717-26111(-)	MGWTLLNKKNLWTSISYHKYIWPLQIMDWFWMPGWNRKGISSVWKALLWSLPLIWSHLNWRINDGTRARIGMDPWTSGGGRCYLPQELIQILEQQSIKVIAHIADEENSTLFSQAWKTTTQLNLTPIWHHNWDDYTSALSESDIHIKDGPDELMWSKAESVNLHIIREKASDSGEWERSCASTTPGSIIPFNLRTEALGQSKSGIAARQFSSEYKGVVPQHNGKWGAQIYVSHQRLWLGTFNSELEAALAYDRACLKFRSAEGPRNLLSGKQCQIENNFQELYTKEQVVQMIKDHTYPEKFNYFISIKSRVPAEAGESIDNISVRQYGQLMVNPEHLFDKEVTPSDVGKLNRLVVPKQHAERNFPSESQINDRDETLVFVDENNKEWEFRYSFWKSSQS…	CTACCTAGTTTGCTTCGCAGTTCCAATTTCAACCCCAAATAGTTTGAAACTACCTTTTGCACTTTCCTTTTTTGGCATCTGAGAAGAGCTGCATACACTTTGACCTGCAACTGTAACATGATCCCTTACTCCATCTTCATCTTGGCTTTCATTTGTTGGGAATAAACTGTGTTCTCTTGCCTGCCTTCTCATATCAGTATTTGATAGTCTTCCCTCCACATTTGACTCCATCCCCAGTTGAGTACCTCCACTATCCACACACTCTGAGTAGTAAGTCATGTGAACTGGAAGAACACTACTGTGCAATACAGAATTCTTGTTGTACAAATGCAGAGACTTCTGATCATGGGGATTAACAACCAAGTGTGCAAAAGGAGAAGAATAACCCATATGTTGGCA…
PITA_49270	APFE031684657.1	scaffold162342:16240-28311(-)	MRWGTSRSPTLDFSRVLDIHPLLLAEGLVLGRSVKNLGAMAASTSLRASEDALKGKPQAQDKENKERHYIGLRQWPWGKFAAEIRDPTKKGARIWLSTLITAEEAALAYDRATFRIHGARALLNFSLAFASNSENELAVGRMRQKRKRGNDNSGTLELRSWGVC*	CTAGCACACCCCCCAACTCCTTAACTCCAATGTCCCGCTGTTGTCATTTCCTCTCTTCCTCTTTTGCCGCATGCGACCTACTGCTAATTCATTCTCAGAATTGGAAGCAAAGGCTAAAGAGAAGTTAAGAAGAGCCCTGGCTCCGTGGATTCTGAAGGTTGCACGGTCATATGCGAGAGCGGCCTCTTCGGCGGTGATGAGAGTGCTGAGCCAAATTCTGGCCCCTTTCTTGGTAGGGTCCCTGATTTCTGCTGCGAATTTACCCCACGGCCATTGCCTAAGCCCTATGTAATGCCTTTCCTTATTCTCTTTGTCTTGTGCCTGTGGCTTCCCCTTCAATGCGTCTTCGCTGGCGCGGAGGCTCGTTGAGGCAGCCATGGCGCCAAGGTTTTTCACCGA…
PITA_49362	APFE030468420.1	scaffold145824:239000-239770(-)	MEKQASSIPETMVTLATPSAASSKSASTVKGGVKRIPTQNRAASSSPQERTLKLKIPTYKGVRRRSWGKWVSEIKEPKKKRKIWLGSFDTPEMAARAYDVAEFYLKGKKQALLNFPEMIDHLLQPLSLSPHDIQVAAEEAAVAFYFSEQERKSPRNPPVSNEPHSSHQLLTVISSGFEATDVELPGEADTSNYSSSVCTPTEGVGESESTVVEDDSFKSFHLFTNWAEAPLLSPRPLFMVHEEEHNLEEGFLWSGF*	TCAAAAACCAGACCAAAGAAATCCTTCCTCCAAATTGTGTTCCTCTTCGTGAACCATAAACAGAGGACGGGGAGAGAGCAGAGGAGCTTCTGCCCAATTGGTAAATAAATGGAAGGACTTGAATGAGTCATCCTCTACCACTGTACTTTCAGACTCACCAACACCTTCTGTTGGTGTACAAACCGACGAGGAATAATTACTAGTATCCGCTTCCCCTGGTAGCTCCACATCTGTTGCCTCAAAGCCTGAGCTAATTACAGTTAATAATTGATGCGAGGAGTGGGGCTCATTACTTACAGGAGGGTTTCTAGGGCTTTTCCTCTCTTGTTCGCTGAAATAGAACGCAACAGCTGCTTCTTCCGCAGCAACCTGAATGTCGTGCGGAGACAAAGAAAGCGG…
PITA_49473	APFE031157231.1	scaffold137028:14684-15394(-)	MVKPSQKQNIHVNGKPESRSLMSRQFKGIRLRKWGKWVSEIRMPNCRAKIWLGSYESPEKAARAYDFAAYCLRGSKARFNFPDSPPEIPCASSLSPSQIQAAAARFAAEEFRMPSDDDTASSSCGSVAESDLPPEIPCASSLSPPPIQATAPRFAAEEFRLPSDEDTASSSCDSVAESNIDSQQISAEQGSAFWDSLFLEDLDNGESLNLEDFPPIDLAMDDLGFLLQPSEDWGIF*	TTAGAAAATCCCCCAGTCTTCGGACGGCTGAAGAAGAAAACCCAAATCGTCCATTGCCAAATCTATGGGAGGAAAATCCTCTAAATTTAGAGATTCGCCATTATCCAGATCTTCCAGGAATAGTGAATCCCAAAATGCCGAACCCTGCTCCGCCGAAATCTGTTGGCTGTCAATGTTGGATTCCGCTACCGAGTCGCAGGACGATGATGCCGTGTCCTCATCTGACGGCAACCGGAATTCTTCTGCGGCGAACCTGGGCGCAGTGGCTTGGATTGGCGGCGGCGATAGAGAAGAGGCGCATGGAATTTCCGGCGGCAAGTCGGATTCCGCTACAGAACCGCAGGACGATGACGCCGTGTCGTCATCTGACGGCATCCGGAATTCTTCTGCGGCGAACCG…
PITA_49848	APFE031117279.1	scaffold56149:3158-7826(+)	MLVNKHITNIKPILQNTQKCWINNIDNNLDEIHDNGTITSGSRQNSRRILENENEFTQQRYCSSYSDVCPDIRTAEAFKVKPELQEQDNGKMGEISVRHYRGVRQRPWEKFAAEIRDPNKRGARIWLGTFNTAEEAALAYDRAAYGRRGARGLLNFSVPIASNSENASAVEEEMKPCRWGGGMDLGIWIEVGGTIMNCSGNSESESEENLNQFAAEIRDPNKRGSRIWLGTFNTTEEAALAYDRTAYGLCGARALLNFSVPVGSNSENASAVGHMSHKRKRGNRGGRAAGWTLD*	ATGTTAGTAAACAAACATATCACTAATATTAAGCCCATATTACAAAACACACAAAAATGTTGGATCAACAATATTGATAATAATCTTGATGAAATCCATGACAATGGCACCATAACTAGCGGCTCCCGCCAAAATAGCAGAAGAATACTTGAAAATGAGAATGAATTTACACAACAGAGGTATTGTTCTTCTTATTCAGACGTATGCCCCGATATAAGAACAGCAGAGGCGTTTAAGGTAAAGCCAGAGCTACAGGAGCAAGATAATGGAAAGATGGGGGAGATCAGTGTTAGGCATTACAGAGGAGTGAGGCAGCGGCCATGGGAAAAATTCGCAGCTGAAATTAGAGATCCCAACAAGAGGGGCGCTCGAATTTGGCTAGGTACTTTCAACACGGCC…
PITA_49904	APFE031706912.1	C4559785:3001-3588(-)	MCGPEANLISLNGSLRVTPRDFNTSSESFKPSNNIFHFNHEFSSGGENEAIPLKDFEQPVFLFGRNINSKVKPLYSPKHDSPLLSAENDENSSAKSSGRKRKTLYRGITQRRWGKWAAQIRDPRKGITVWLGTFNTAEEAAKAYDAEAKKIRGKKAKLNFPDD*	TTAGTCGTCAGGAAAGTTCAGCTTCGCTTTCTTTCCTCTGATCTTTTTAGCCTCTGCATCATACGCCTTGGCGGCTTCCTCTGCCGTATTAAACGTTCCAAGCCAAACCGTAATGCCCTTTCTTGGATCTCGAATCTGTGCAGCCCATTTTCCCCATCGACGCTGCGTGATACCTCTGTACAAAGTTTTCCTCTTCCTCCCGCTGCTTTTGGCCGAGGAATTTTCGTCATTTTCAGCACTTAGCAGAGGAGAGTCATGCTTTGGTGAATATAAAGGTTTCACTTTGCTGTTTATATTCCGACCAAATAAAAAAACAGGCTGTTCGAAATCCTTGAGAGGAATAGCCTCATTTTCACCACCTGAAGAAAATTCATGGTTGAAGTGGAAAATATTGTTGCT…
PITA_49958	APFE030949772.1	C5123455:20329-21021(+)	METTHDKMKPGNCENGCYVVSIGLQNGKLVIDYETSPEKRDDQFDLTEFKIECEKVMLLACAENEAIPPLKDFKKYRGMRLRPKGKWAAKIRDPRKGIVVWLGTLNTTEEAAKAYDAEAKRIIGDKVKLDFPDHSCFVKVDTSQKMSGMKVKPCTEQPVLLFGGNINSKVKHLYSPKPNLSKGYS*	ATGGAAACAACACATGATAAAATGAAGCCCGGAAACTGCGAGAATGGATGTTATGTTGTTTCCATCGGTCTGCAAAATGGAAAACTAGTGATCGACTATGAAACATCACCAGAAAAAAGAGACGACCAGTTCGATTTGACAGAGTTTAAGATAGAGTGCGAGAAAGTAATGCTACTGGCCTGTGCTGAAAATGAAGCGATTCCTCCTCTGAAGGATTTCAAAAAGTACAGAGGTATGAGGCTGCGTCCAAAGGGAAAATGGGCTGCGAAGATTCGAGATCCAAGAAAGGGCATTGTGGTTTGGCTTGGAACGCTTAATACGACAGAGGAGGCCGCCAAGGCGTATGATGCAGAGGCTAAAAGGATCATAGGCGACAAAGTGAAACTCGACTTTCCGGAT…
PITA_50024	APFE031437633.1	scaffold21793:62724-64670(+)	MQNRSRKRRSAESNNAQDSSQEESTVSNGDKQRALGVHGKRHPVYRGLRMRSWGKWVSEIREPRKKTRIWLGTFRTPEMAARAHDVAALSVRGNSAFLNFPHLASSLPRPVTLSPRDIQRAAAASAADFHMPSAEYHNEDRSRDSVGTNSCGDNVMPAEPSIPKDAAAACVCDSAWISSFLSEKESVIIDKDILFDLPNFLEYAYTLKVDDKSDVYSFGVVLLELITGRKPVGESEFGEGVDICNKSLLITRFSSFQSKNLLTAAVTVQDNEKRDIEETPRRRRRSPVFRRQGNFAPVGLSGSAPRCCAFLRPYATRLTSLSVEEAQYLEEEQYDPGMGMVSSNMQRISVWKGHRSQHLFGKAIGASTC*	ATGCAGAATAGGTCGCGCAAGCGTCGTTCAGCGGAAAGTAACAATGCACAGGATTCTAGCCAAGAGGAGTCCACAGTCAGTAATGGAGATAAACAGCGGGCGCTGGGAGTTCATGGAAAGCGGCACCCTGTTTACAGAGGCCTGAGAATGCGGTCTTGGGGTAAATGGGTGTCAGAGATTCGAGAGCCCAGGAAGAAAACCAGAATTTGGTTGGGGACGTTCCGGACGCCAGAGATGGCGGCTCGAGCCCACGACGTGGCGGCTCTCAGCGTAAGGGGGAACTCGGCTTTTCTCAATTTTCCACACCTCGCCTCTTCGTTGCCTCGCCCTGTCACATTGTCACCCAGGGACATCCAGAGGGCTGCGGCGGCCTCTGCGGCTGACTTTCACATGCCTTCA…
PITA_50076	APFE030959299.1	C4487527:14272-14982(+)	RLLYNPPHCLEMAMNPFEHYCDCAKATKDVTAGESMNMLELIRHHLLEVDDDIDIHHNGRGVCINVDDHGDIQADAAAASTSKSSCQNSSSSSTPRHTQSSSVAAVIRSAEAVNVKVKPNQGNAEMNQRKTRYYRGVKRRPWGKFAAEIRDPCKKGARVWLGTFNTAEEAALAYDRAAFRIRGAKAVINFPLTFASNSESESAMDYMAPPKRKRRNGGDGQQEVREGNSQAKCQKF*	AGACTGCTTTATAATCCTCCTCACTGTCTTGAAATGGCAATGAATCCATTTGAACATTATTGTGACTGCGCAAAGGCCACGAAGGACGTCACAGCAGGGGAGAGCATGAATATGCTGGAGTTGATTCGCCACCATTTGCTCGAAGTAGACGACGATATTGATATTCATCATAATGGCAGAGGTGTTTGTATTAACGTTGATGATCATGGTGATATCCAGGCCGATGCCGCCGCCGCCAGCACCAGTAAGAGCTCATGTCAAAATAGCAGCAGCAGCTCCACACCACGACACACTCAGTCTTCTTCTGTAGCCGCAGTCATAAGAAGCGCAGAGGCGGTAAATGTGAAAGTAAAGCCGAATCAGGGGAATGCAGAGATGAATCAGAGGAAGACCAGGTAT…
PITA_50115	APFE031475681.1	C4753651:8346-10125(-)	MTSESVNNMNLVNCGKRAPDQSITTPEKSSATPPAHSKFRGVTKNRWTDRYQARLWDGTWKKQGAKRNGKPGAYDSAERAAKAYDVAAIKFWGLTAKTNFPGRDYEKEMKEMEHMTNEELVGKLRRLQWCFRDTEQAWDSVEARPSIAGLADTEEEAAVAYDTAALKHWGPHKLVATNFDVRNYDLDQIRRPELCHSKREINTCTATASEPKSACPYKFNAHIHEYNLRHHDAG*	TTATCCAGCATCATGGTGGCGGAGATTGTACTCATGAATGTGTGCATTGAATTTATATGGACAGGCGCTTTTGGGCTCGCTGGCAGTGGCAGTACAAGTATTGATCTCCCGCTTTGAATGACATAACTCCGGACGTCGAATTTGATCGAGATCGTAATTCCTGACGTCGAAATTAGTGGCAACCAGCTTGTGCGGCCCCCAGTGCTTAAGGGCCGCAGTATCATAAGCCACAGCAGCCTCCTCTTCTGTATCTGCTAACCCCGCGATACTTGGACGTGCCTCCACAGAATCCCAGGCTTGTTCTGTGTCACGAAAACACCACTGCAATCTCCTGAGCTTCCCCACCAGTTCTTCATTAGTCATGTGCTCCATCTCTTTCATCTCTTTTTCATAGTCCCT…
PITA_50199	APFE031745142.1	C4441847:12508-13688(+)	MPQSDLDSAACDNDGGSYIEPTNTEEQSNAMAVVDGGVRSLIPQACHTEGRTSVVGDPNANSMGERLRKYRGVKLTNRKWRAQASYRKNDPEKSKKSVHLGTFPTAEMAAVAYDAAVLVLRGESRANRLNFPEYSPHIKSIVEGFSPSDIASNMKYVASKAAKNIGHLLSLENKDSQQEDEGFEVSAAMPAAAISSSSASLMSSNIAGVKQRIKEVARAAGRERQIRRKIYDDKQDSGISCFSVMQEPEHECSTPVGIAKNNVNNEKIHPGQSSRGCAADSGISSFSFAYDPLHESSVHEPKFPISNPNSMPKKVQSFDELIDIAKDPYMP*	ATGCCGCAAAGCGATTTGGACTCTGCTGCTTGTGATAATGATGGAGGTTCATATATTGAACCCACTAACACTGAAGAACAAAGCAACGCTATGGCTGTTGTTGATGGTGGTGTCAGATCTCTGATTCCACAGGCCTGTCATACAGAAGGTCGTACTAGTGTTGTTGGAGATCCTAATGCCAACAGTATGGGTGAACGATTACGGAAATACAGAGGTGTGAAGCTTACTAATAGAAAATGGAGGGCACAAGCTAGTTATCGAAAAAACGATCCTGAGAAATCGAAAAAGTCGGTCCATCTTGGAACTTTTCCGACAGCAGAGATGGCTGCAGTTGCCTACGACGCAGCAGTCTTGGTCCTAAGGGGCGAGTCACGTGCCAATCGTCTGAACTTTCCAGAG…
PITA_50216	APFE030047611.1	scaffold28607:130533-142480(-)	MAAAHLAAVSKLSWRVNLHGGNRLYLPPLKRLHPLLHLQRPSSIMLRCFVHHASLLHLQRAFVQMLLHRKDALIMHPEPVANVHDFMSGNLRLYIYEGNGRCNKILGVRFAMPGKWKSEIRCGGRQRISLGTFGRPEQAARAYDAACLALRGNSAVRNFPRLRKLLPQSRSQDPKDIKEAAKQAAAETVSASLSLAETLAASGDIEEQEQQSTTSASFSLAETAAGAYDGACLALKGDDAVLNFQYLRNLLPPSHSRNTNDIKETAREAAVVVSIRADTVAVSEHIEQYEQQRSASESTAVSEHIDGYSAFDDEPPTPYFDRKMAEALMIAPPPLYDEDDPNQLATVVSLWSYPSRSLDRSEIMSLSVLLCQWSGHTLKLGSLKAHFQLDVSEHPAVTK…	TCAGCTCCAAGCAATGATGTTTTTCGCAGCTCGCCTTACAATGCTCATAACAACAGAACCAATCACCAGCTCATTGAATATAACCATGCAACAGAGCACAACAAGCATCTTGCCGATACGATCTGCAATTTCTTCTACGCTTGGAATGCGAGGAGAGTGAATGTCATAGACACCAGGATCGATTCTGGCACCATATTTCACACCCTCTCGGAAAACTGAGAGAAGTTTCTCTTCGGAACGAGAATTCTCAATGGTGATGACATCGGCATCCATATCAATGATGGAATGAATAATGTCATTGAAGTTTGAGTAGCACATGTGAGTATGGATCTGAGTGGTATCTTGCACACCACAATTACTGATGTGGAATCCGTGTACAGCCCAATCCAGGTAATAAGC…
PITA_50272	APFE030711355.1	C5034589:42932-43651(-)	MNYLHLYESLLSNSSLHHNPSLSILQTFTSRSSFPRQNPDMTKPSQNQNGHSSTQSSSLKSGQFKGIRRRKWGKWVSEIRMPNSSGRIWLGSYDTPEKAARAYDFAVYCLRGSNAKLNFPHSPPEILCASSLSPIQIQIAAAKFAAQEFRLPSENSAASSSSSLEVECNMEDQQITAEKDHAFRESVPLEGTDCWGSPNIEDIPPLDVWMEDFEILFQLTEDWGPWISNFYFPPAEILL*	TCATAGCAGAATCTCAGCAGGGGGAAAATAAAAATTAGAAATCCACGGTCCCCAGTCTTCTGTCAGCTGGAAAAGAATCTCAAAATCCTCCATCCACACATCCAAGGGAGGAATGTCCTCTATATTTGGAGACCCCCAACAATCCGTACCTTCAAGTGGTACTGATTCCCGAAATGCGTGATCCTTCTCTGCCGTAATCTGCTGGTCTTCCATGTTGCATTCCACTTCCAAACTGGACGATGAGGATGCCGCGCTATTCTCCGAAGGCAGACGAAATTCCTGTGCGGCGAACTTGGCCGCAGCGATTTGAATTTGGATCGGCGACAGAGACGAAGCGCAGAGAATTTCCGGCGGGGAATGGGGGAAATTGAGCTTGGCGTTGGATCCTCTGAGGCAGTA…
PITA_50513	APFE030976756.1	C4361455:6781-9037(-)	MARPQRYRGVRQRHWGSWVSEIRHPLLKTRIWLGTFETAEDAARAYDEAARMMCGPRARTNFPFNPNAPPSPSSKVLSSTLTAKLHRCYLASIQGPRSGSSKKDAMTRADKNNNIHSSNQSLTCLRLDNERSNNIGIWQKKAGSKQSESNWVMKLELDHDQHGNSTLKRETDDDIAQMIEELLDCGSLEICSPMASADSSISNAESMLN*	CTAATTAAGCATCGACTCTGCATTACTGATACTAGAATCAGCAGAAGCCATGGGAGAGCAGATCTCCAAGGATCCACAGTCAAGTAATTCCTCAATCATTTGAGCAATATCATCATCTGTCTCCCGTTTCAGCGTACTGTTTCCATGCTGATCATGATCCAACTCCAACTTCATAACCCAATTTGATTCAGATTGCTTAGACCCAGCTTTCTTCTGCCAAATACCAATGTTGTTGGATCTTTCGTTATCCAATCTTAAGCAAGTGAGGGACTGATTGCTGCTATGTATATTGTTATTTTTATCAGCTCTTGTCATGGCATCCTTCTTCGATGAGCCCGATCTCGGTCCTTGTATCGAGGCCAGATAACAGCGGTGTAGTTTGGCAGTGAGCGTGGAGGA…
PITA_50663	APFE031501687.1	scaffold66094:92680-94823(+)	MFPSHYIALALRRQIWRNPPESRQRHSRPPPEENPGKFCRKFKGIRMRKWGKWVSEIRMPKSTGRIWLGSYKTAEQAARAYDAAVYCLRGPNAKFNFPDSVPPIPSVSSLSHQQIQVAAAKYALNEIPLTLPSLQNINNKNNRMEKPPSPSRWSLALETEWACDKHAARAYEAAAYCLRGPNAKFNFPDPVSSIPSASTLSRHQIQAAAAKYALAEISSTSPSLQNIKTSKDKASHPRPYSVSEAECACDNRKISNMLNFGLCQCPFDGHRNLNLEKIPSIEGASVLGLIPNLQEGRGAKLGLQLVGPHRFVELLRDFWNLQGREGKKRSTCQMKIPYLYFVTVSSKHLVSTPSSLHFCLRDVAQDIYLYIGLAK*	ATGTTTCCCTCCCACTACATAGCGCTGGCATTGCGCCGCCAAATATGGAGAAACCCTCCAGAGTCCCGACAGCGCCATTCCCGGCCTCCTCCAGAGGAAAATCCCGGAAAATTTTGCCGCAAATTTAAGGGAATCCGAATGCGAAAATGGGGGAAATGGGTGTCCGAAATTCGGATGCCGAAATCGACAGGGAGGATCTGGCTAGGATCCTATAAAACTGCCGAGCAAGCCGCCCGTGCTTACGATGCGGCAGTGTATTGCCTGAGAGGCCCCAACGCCAAATTCAATTTCCCCGATTCCGTGCCCCCCATTCCATCTGTGTCTTCTCTTTCTCATCAGCAAATTCAAGTCGCTGCCGCCAAATATGCCTTGAACGAAATCCCTTTAACTTTGCCCTCT…
PITA_50717	APFE030240505.1	scaffold217573:33994-56094(+)	MNPHSSRRAWKIEINWTDAEGIQDWLIVNNMHKGHIIPHLDREDRLRWGLQITRKIYSQGSLWFSSRPYRTPLGALMEEYMDIQTMDEGGTLLVASWPTKDPNMGLTPSPRLYWAFMVSNMLEVRLTAVVKARRSEFGVHGRQGGQRDTEILIWRDAPAGFAAPLAPYGFLFGRSWVGTWPGACGDKVVTALDWNAQVSPPHGNLCALQDSVTRRYKCRSKKVKRVYTVTMKNSGKCAFNGLDESKSSKMVIRPRLVRVICADPDATDSSSDEEESCSRNPNRVKKYVQEIHITMDSMPPSSSESESEEDEEEGGEQETEFGASDYSKAWTRKSPRISRKQAKTGPKWALRKIENRACRKSIKNGLSLFPRRSRLRATSAATSPFRSGIPEPVGFSVLE…	ATGAATCCTCATTCTTCTCGGAGAGCTTGGAAAATTGAGATTAACTGGACAGATGCAGAAGGAATTCAGGATTGGCTCATTGTTAATAACATGCATAAAGGCCATATAATTCCTCATTTAGACAGGGAGGATAGACTAAGATGGGGGTTACAAATCACTAGGAAAATTTATAGTCAAGGAAGCCTATGGTTTAGCAGTCGGCCATATAGGACTCCCTTGGGAGCCCTTATGGAGGAATATATGGACATCCAAACTATGGATGAAGGTGGCACACTTCTTGTGGCTTCTTGGCCAACGAAGGATCCTAACATGGGATTAACTCCCTCACCAAGGCTATATTGGGCCTTCATGGTGTCCAATATGTTAGAAGTCAGGTTAACGGCCGTCGTTAAGGCACGC…
PITA_51087	APFE030062501.1	C4344543:9623-11429(-)	MTSESVNNMNLVNCGKRAPDQSITTPEKSSATPPAHSKFRGVTKNRWTDRYQARLWDGTWKKQGAKRNGKPGAYDSAERAAKAYDVAAIKFWGLTAKTNFPGRDYEKEMKEMEHMTNEELVGKLRRLQWCFRDTEQAWDSVEARPSIAGLADTEEEAAVAYDTAALKHWGPHKLVVTNFDVKNYDLDQIRRPELCHSKREINTCTATASEAKSACPYKFNPHIHENNLRHHAVG*	TTATCCAACAGCATGGTGGCGGAGATTGTTCTCATGAATGTGTGGATTGAATTTATATGGGCAGGCGCTTTTGGCCTCGCTGGCAGTGGCAGTACAAGTATTGATCTCCCGCTTTGAATGACATAACTCCGGACGTCGAATTTGATCGAGATCGTAATTCTTGACGTCGAAATTAGTGACAACCAGCTTGTGCGGCCCCCAGTGCTTAAGGGCCGCAGTATCATAAGCCACAGCAGCCTCCTCTTCTGTATCTGCTAACCCCGCGATACTTGGACGTGCCTCCACAGAATCCCAGGCTTGTTCTGTGTCACGAAAACACCACTGCAATCTCCTGAGCTTCCCCACCAGTTCTTCATTAGTCATGTGCTCCATCTCTTTCATCTCTTTTTCATAGTCCCT…
PITA_51224	APFE031298980.1	C4287675:2483-3631(-)	MTTQSARVRVTRPARRMEVNQRRGKPGRDGVEILEECRLRNGEMEEFDTFGNLRLYIYEGNGRCNKILGVRSAMPGKWKSEIRCGGRQRISLGTFGRAEQAARAYDAACLALRGNSAVRNFPRLRKLLPQSRSQDPKDIKEAAKQATSETVSASLSLAETLAASGDIEEQEQQSTTSASFSLAETAAGAYDSACLALKGDDAVLNFQYLINLFPPSCSRNTNDIKETARQVVHLFCRKKNDAYSF*	CTAAAAAGAATACGCATCGTTCTTCTTTCGACAAAATAAATGAACGACTTGTCTAGCTGTCTCTTTTATGTCGTTGGTGTTCCGAGAGCACGATGGTGGGAATAAATTTATTAAATACTGGAAATTTAGCACTGCATCGTCTCCTTTCAGAGCTAGACAAGCACTGTCGTAGGCTCCGGCTGCGGTTTCTGCCAGTGAAAACGATGCACTGGTAGTGCTCTGTTGTTCTTGTTCTTCAATATCCCCCGATGCAGCTAAGGTTTCTGCCAACGAAAGCGATGCACTAACTGTTTCAGATGTTGCTTGTTTAGCTGCCTCTTTTATATCTTTGGGGTCCTGAGAACGCGATTGTGGCAATAACTTTCTTAAACGCGGAAAATTTCGCACTGCAGAGTTCCC…
PITA_51232	APFE031200408.1	C5057141:4029-4616(-)	MCGPEANLISLNGSLRVTPRDFNTSSESFKPSNNIFHFNHEFSSGGENEAIPLKDFEQPVFLFGRNINSKVKPLYSPKHDSPLLSAENDENSSAKSSGRKRKTLYRGITQRRWGKWAAQIRDPRKGITVWLGTFNMAEEAAKAYDAEAKKIRGKKAKLNFPDD*	TTAGTCGTCAGGAAAGTTCAGCTTCGCTTTCTTTCCTCTGATCTTTTTAGCCTCTGCATCATACGCCTTGGCGGCTTCCTCTGCCATATTAAACGTTCCAAGCCAAACCGTAATGCCCTTTCTTGGATCTCGAATCTGTGCAGCCCATTTTCCCCATCGACGCTGCGTGATACCTCTGTACAAAGTTTTCCTCTTCCTCCCGCTGCTTTTGGCCGAGGAATTTTCGTCATTTTCAGCACTTAGCAGAGGAGAGTCATGCTTTGGTGAATATAAAGGTTTCACTTTGCTGTTTATATTCCGACCAAATAAAAAAACAGGCTGTTCGAAATCCTTGAGAGGAATAGCCTCATTTTCACCACCTGAAGAAAATTCATGGTTGAAGTGGAAAATATTGTTGCT…
PITA_51465	APFE031756556.1	C4911957:2145-3169(+)	MAPRDLEGDGSKKSGTDGNANANALEENPYIGVRKRKWGRYSAEIRDPLRKCRVWLGTWDTAEEAAREYDQTAKVLKGPHAKINFPSSDNLRCCAKGRSAALDRAVDTQLLPPEVEKATMRSLDLNLTIKEDNEDTQLSASPPAVKALSPLGFDLNLTPKENNEDTQLSASPPAVKALSSLGFDLNLTAEENNEDRQLSA*	ATGGCTCCCAGAGATCTGGAAGGCGATGGCAGTAAGAAAAGTGGAACTGATGGCAATGCTAATGCCAATGCCCTAGAGGAAAACCCTTACATTGGCGTCAGAAAACGTAAGTGGGGCCGTTACTCGGCTGAGATACGAGATCCCCTCAGGAAATGTCGTGTTTGGCTGGGCACGTGGGACACCGCCGAAGAAGCAGCACGGGAATATGACCAAACCGCCAAAGTTCTGAAAGGACCCCATGCCAAGATCAATTTCCCCTCTTCTGACAACCTCAGATGCTGCGCGAAGGGCCGAAGCGCCGCGCTCGACAGAGCGGTAGACACCCAACTTCTTCCTCCTGAAGTCGAGAAGGCGACTATGCGGTCCCTCGATCTGAATCTCACAATAAAAGAAGATAAT…
PITA_51697	APFE030127574.1	scaffold191945:48410-49537(+)	MAPTDRDSSKRVVDANVNGMKEVNYRGVRKRPSGKYRAEITDPAIKRRRWLGTVPTAEEAVRAYDNAAINLKGARAKTNFPRPSLPLDTVHINRCSSAATKRVAIPPPPCTARNLKGAREKTNFPPPSLPLDTAHINRCSPAATTRLSTPPPPSPSPPVNHYNNKNGLFANISEQRKPSTNIYMNEPMVMQQQQHPIVIPFWGQISMPHMIKKPNDNEWVRTGVTNNILPTPNSETSTCDSSSSTAVSSIQVSPSDPSTMERAIPRTGTQVSPLDPSTMERATPMTGTQVSTIDPSTMERATPRTFDLNLSEGEEEEHSPSLVLSLALDFH*	ATGGCTCCCACTGACAGAGATAGTAGCAAGAGGGTGGTGGACGCGAATGTGAATGGTATGAAGGAAGTGAATTACAGAGGCGTGAGAAAGAGACCCTCGGGTAAATACAGGGCTGAAATCACAGATCCTGCCATTAAGAGACGCAGGTGGCTAGGTACCGTCCCCACAGCCGAGGAAGCGGTGAGAGCATATGACAACGCCGCAATAAATTTGAAAGGAGCCAGAGCAAAGACCAACTTCCCACGTCCCTCGCTTCCTCTCGACACCGTCCACATCAACAGATGTAGCTCCGCAGCCACTAAGAGAGTCGCTATCCCTCCGCCTCCCTGCACCGCCAGAAATTTGAAAGGAGCTAGAGAAAAGACCAACTTCCCACCTCCCTCGCTTCCTCTCGACACT…
PITA_51750	APFE030102135.1	scaffold108461:260135-261574(-)	MASTSGSMQGIYVSSSMGMASNRNEDWWDIKAVNSQQSSSRLLEASTPRPSTNQAPSSYPRREDRPQTAESRVQAGNLSERDDSSSSLFHNNNSSSSSSSHLISFPAHYPQVISSISSSPSSSTLHQHGSEFFYLNQVTQAYPTHHSTHQAISFPQQQICFTNLQSPAQQQQLQFQSGFPLVSFNNQQNLQQQQYQQQLVRQWSDALNLSPRGQLMKHGKHHDRRGFALARPMKLYRGVRQRHWGKWVAEIRLPRNRTRLWLGTFDTAEDAALAYDHEAYKLRGENARLNFPHLFLNKGSTSPKACSVAAAPEEGNLQQKSDGGRNSTTSSTSTSALTANAAHQLGSPAAEGISDTAQAKSMDVEVKTDLDISAYEANTNLAPPAESGSEDFVKNEPQD…	CTATTTGCAGTCTTTCCAAACATACATCTGCTGCGGCGGAGAGTGATGCTCCGGGGATGCTTGTCCTTGAGTCTCAAGCTTGTGATCTGAGTCCACTCCTTCCACATAGCTATCAATTGGATTGTGAAAAAGAACATCCCATGTCATATCTGTTTCTAAAGCAGGAACACTATTTAACCAGTTTTCATCCAGATCACCCCAGATATTATATTCAGGGGAGGCAGGCCAGGTATGGAATTGAAGGTCCTGAGGTTCATTTTTGACAAAGTCCTCGGATCCAGATTCTGCAGGAGGAGCCAAATTTGTATTGGCTTCATATGCAGATATGTCCAGATCAGTTTTCACCTCAACATCCATGGATTTGGCCTGCGCTGTATCTGAAATACCTTCGGCTGCAGG…
