# Supplementary material for: Genome-wide identification and characterization of the AP2/ERF gene family in loblolly pine (Pinus taeda L.)
Source: PeerJ. 2024 May 21;12:e17388. doi: 10.7717/peerj.17388 (PMC11122039; doi:10.7717/peerj.17388)
Supplement: Supplemental Information 5 [file peerj-12-17388-s005.xlsx]

## Sheet: Sheet1
Sequence ID	Subfamily	Number of Amino Acid (aa)	Molecular Weight (Da)	pI	Instability Index	Grand Average of Hydropathicity	Subcellular Localization	Transmemb rane structure
PITA_00259	III-DREB	843	92888.8	6.36	48.86	-0.357	Nucleus	None
PITA_00833	II-DREB	198	21958.6	5.37	63.14	-0.743	Nucleus	None
PITA_00907	IX-ERF	319	35118.6	7.14	57.24	-0.775	Nucleus	None
PITA_00931	AP2	642	70855.7	6.02	52.07	-0.675	Nucleus	None
PITA_01000	III-DREB	245	27166.7	9.33	58.29	-0.583	Chloroplast	None
PITA_01007	VII-ERF	494	54563.5	5.22	43.32	-0.642	Nucleus	None
PITA_01074	II-DREB	234	25640.5	4.45	67.87	-0.49	Chloroplast	None
PITA_01156	VII-ERF	295	33593.2	6.11	64.68	-0.856	Nucleus	None
PITA_01270	IX-ERF	213	23605.3	7.73	38.46	-0.695	Nucleus	None
PITA_01484	II-DREB	316	33957.7	6.21	64.54	-0.636	Nucleus	None
PITA_01592	IX-ERF	349	39557.3	8.57	48.04	-0.669	Cytoplasm	None
PITA_01616	RAV	582	65949	8.65	45.17	-0.673	Nucleus	None
PITA_02042	VIII-ERF	132	15229.4	9.92	58.61	-0.889	Nucleus	None
PITA_02225	II-DREB	190	21422.6	5.66	60.05	-0.766	Nucleus	None
PITA_02539	II-DREB	208	23673.5	9.13	44.21	-0.607	Nucleus	None
PITA_02556	II-DREB	358	40240.9	5.66	75.5	-0.745	Nucleus	None
PITA_02581	III-DREB	245	27166.7	9.33	58.29	-0.583	Chloroplast	None
PITA_02761	VII-ERF	468	52296.8	6.12	45.22	-0.631	Nucleus	None
PITA_02889	III-DREB	245	27198.7	9.33	57.98	-0.593	Chloroplast	None
PITA_03224	IX-ERF	354	39810	7.57	52.89	-0.633	Nucleus	None
PITA_03623	II-DREB	231	27056.2	9.39	44.16	-0.461	Nucleus	None
PITA_03695	VII-ERF	163	18331.6	9.68	34.33	-0.848	Nucleus	None
PITA_03709	VII-ERF	153	17247.1	9.96	35.53	-0.848	Nucleus	None
PITA_04364	II-DREB	254	28265.5	5.02	71.91	-0.523	Cytoplasm	None
PITA_04644	II-DREB	245	27329.1	9.36	71.17	-0.478	Nucleus	None
PITA_04780	IX-ERF	188	20994.3	6	41.26	-0.694	Nucleus	None
PITA_04978	II-DREB	198	22301.7	4.88	62.79	-0.8	Nucleus	None
PITA_05049	V-ERF	209	23434.3	8.85	49.26	-0.77	Mitochondria	None
PITA_05232	II-DREB	280	32040.3	9.66	60.6	-0.843	Chloroplast	None
PITA_05248	X-ERF	515	57632.3	7.79	58.04	-0.826	Nucleus	None
PITA_05436	II-DREB	219	24927.8	5.24	73.03	-0.764	Nucleus	None
PITA_05723	VII-ERF	312	34303.6	9.45	27.29	-0.846	Nucleus	None
PITA_05728	IX-ERF	338	38192.6	4.84	56.31	-0.677	Nucleus	None
PITA_05778	AP2	251	28429.8	8.5	47.18	-0.844	Mitochondria	None
PITA_05918	III-DREB	412	44346.9	5.33	41.36	-0.109	Chloroplast	One
PITA_06063	V-ERF	193	21955	7	52.34	-0.515	Nucleus	None
PITA_06095	X-ERF	381	43187	8.42	52.42	-0.898	Nucleus	None
PITA_06125	VIII-ERF	143	16120	9.73	66.59	-1.034	Nucleus	None
PITA_06260	IX-ERF	214	23826	9.22	38.36	-0.591	Nucleus	None
PITA_06282	VII-ERF	187	21196.3	9.81	37.49	-0.779	Nucleus	None
PITA_06552	II-DREB	185	21122.8	4.88	51.67	-0.494	Nucleus	None
PITA_06555	I-DREB	193	21465.3	6.21	38.51	-0.452	Mitochondria	None
PITA_06696	RAV	488	53898.4	8.3	48.67	-0.591	Nucleus	None
PITA_06713	III-DREB	369	41151.3	9.13	60.08	-0.54	Nucleus	None
PITA_06934	II-DREB	226	25057.8	4.55	70.74	-0.407	Cytoplasm	None
PITA_06985	III-DREB	154	17393.8	8.93	64.1	-0.693	Mitochondria	None
PITA_06992	IX-ERF	485	55325.4	8.89	65.16	-0.864	Nucleus	None
PITA_07517	IV-DREB	334	37451.4	7.19	55.96	-0.905	Nucleus	None
PITA_07540	IV-DREB	232	25135.9	4.51	32.09	-0.477	Mitochondria	None
PITA_07979	III-DREB	167	18544.1	10.22	59.45	-0.662	Chloroplast	None
PITA_08577	V-ERF	203	23028	7.69	61.81	-0.627	Nucleus	None
PITA_08629	IX-ERF	127	14560.2	9.33	67.23	-1.044	Nucleus	None
PITA_08733	VII-ERF	513	56664.9	5.03	46.03	-0.625	Chloroplast	None
PITA_08829	IX-ERF	326	36640.1	6.84	43.87	-0.712	Nucleus	None
PITA_09250	AP2	234	26479.7	8.81	46.62	-0.909	Mitochondria	None
PITA_09315	III-DREB	208	22889.8	9.2	61.63	-0.607	Chloroplast	None
PITA_09364	AP2	252	28524	8.2	46.69	-0.817	Mitochondria	None
PITA_09926	III-DREB	285	31042.5	10.03	54.52	-0.307	Chloroplast	None
PITA_10070	II-DREB	364	41114.3	5.78	56.65	-0.502	Nucleus	None
PITA_10393	AP2	861	94433.9	6.32	57.16	-0.711	Nucleus	None
PITA_10423	AP2	252	28592.1	8.49	47.03	-0.814	Mitochondria	None
PITA_10671	AP2	830	91778	5.99	58.52	-0.775	Nucleus	None
PITA_10698	VIII-ERF	490	54889.6	6.02	65.25	-0.728	Nucleus	None
PITA_10968	RAV	491	54443.1	8.87	50.67	-0.566	Nucleus	None
PITA_11141	III-DREB	172	19716.1	9.39	58.14	-0.903	Nucleus	None
PITA_11146	IX-ERF	231	25489.4	6.67	52.64	-0.656	Nucleus	None
PITA_11766	AP2	234	26548.7	8.87	46.94	-0.924	Mitochondria	None
PITA_11770	AP2	251	28403.8	8.5	45.64	-0.83	Mitochondria	None
PITA_12274	X-ERF	318	36225.3	9.01	45.01	-0.954	Nucleus	None
PITA_12322	VIII-ERF	172	19238.6	6.84	47.99	-0.668	Nucleus	None
PITA_12511	VII-ERF	282	31055.8	9.45	30.66	-0.755	Nucleus	None
PITA_12584	VII-ERF	215	23961.3	9.78	41.89	-0.779	Nucleus	None
PITA_12882	RAV	752	83843	6.72	55	-0.373	Cytoplasm	None
PITA_12934	RAV	378	42464.9	6.9	42.84	-0.618	Nucleus	None
PITA_13056	III-DREB	245	27108.6	9.43	58.79	-0.562	Chloroplast	None
PITA_13317	RAV	544	59790.9	8.02	55.79	-0.568	Nucleus	None
PITA_13485	VII-ERF	493	54680.9	6.2	51.13	-0.659	Nucleus	None
PITA_13531	IX-ERF	225	24744.3	6.39	57.82	-0.646	Nucleus	None
PITA_13626	X-ERF	412	46387.5	5.6	54.49	-0.693	Nucleus	None
PITA_13952	III-DREB	218	24254.6	4.91	43.25	-0.114	Chloroplast	None
PITA_14145	VII-ERF	175	19407.8	9.52	26.68	-0.714	Nucleus	None
PITA_14277	II-DREB	379	41571.9	9.58	51.79	-0.735	Nucleus	None
PITA_14421	VII-ERF	163	18361.7	9.68	35.61	-0.833	Nucleus	None
PITA_15081	AP2	252	28578	8.49	46.45	-0.825	Mitochondria	None
PITA_15109	RAV	414	47590.8	7	42.79	-0.754	Chloroplast	None
PITA_15245	II-DREB	203	22598.2	5.74	56.7	-0.58	Nucleus	None
PITA_15348	VII-ERF	428	47748.5	6.06	50.75	-0.609	Nucleus	None
PITA_15381	IX-ERF	217	24189.1	7.73	46.75	-0.82	Nucleus	None
PITA_15448	II-DREB	197	21549.5	8.6	50.94	-0.479	Chloroplast	None
PITA_15461	VII-ERF	428	47926.7	5.76	52.82	-0.62	Nucleus	None
PITA_15796	IV-DREB	334	37451.4	7.19	55.96	-0.905	Nucleus	None
PITA_15819	VII-ERF	428	47706.6	5.87	51.54	-0.567	Nucleus	None
PITA_16114	AP2	226	25673	9.24	42.41	-0.85	Mitochondria	None
PITA_16944	AP2	234	26594.8	8.87	47.41	-0.888	Mitochondria	None
PITA_17746	IX-ERF	262	28907.1	5.17	43.97	-0.541	Nucleus	None
PITA_18051	VI-ERF	500	55585.8	4.83	59.42	-0.911	Nucleus	None
PITA_18168	III-DREB	452	49701	5.99	60.26	-0.393	Mitochondria	None
PITA_18529	VIII-ERF	390	43476.6	9.58	51.96	-0.456	Cytoplasm	None
PITA_18762	III-DREB	230	25747.8	5.64	53.08	-0.641	Nucleus	None
PITA_18842	VIII-ERF	257	27806	9.07	54.14	-0.512	Chloroplast	None
PITA_18921	III-DREB	201	22549.4	9.21	63.69	-0.778	Nucleus	None
PITA_18941	AP2	234	26562.8	8.87	46.94	-0.924	Mitochondria	None
PITA_19159	IX-ERF	275	30377.7	5.54	44.03	-0.607	Nucleus	None
PITA_19406	III-DREB	245	27166.7	9.33	58.29	-0.583	Chloroplast	None
PITA_19617	VII-ERF	493	54464.5	5.72	47.82	-0.647	Nucleus	None
PITA_19735	VIII-ERF	300	33279.2	5.8	60.83	-0.698	Nucleus	None
PITA_20467	IX-ERF	467	51862.3	7.7	45.26	-0.53	Nucleus	None
PITA_20685	VII-ERF	272	30571.5	9.39	39.77	-0.64	Nucleus	None
PITA_20773	IX-ERF	197	21947.7	7.97	52.57	-0.549	Nucleus	None
PITA_20788	IX-ERF	364	40612.2	5.21	51.03	-0.576	Nucleus	None
PITA_20957	X-ERF	439	48601.9	6.13	61.96	-0.928	Nucleus	None
PITA_21181	RAV	669	74927.7	6.68	49.32	-0.637	Extracellular	None
PITA_21258	AP2	234	26562.8	8.87	46.94	-0.924	Mitochondria	None
PITA_21301	VII-ERF	196	22058.8	9.43	40.43	-0.842	Nucleus	None
PITA_21351	VII-ERF	208	23450.1	7.55	32.88	-0.403	Extracellular	None
PITA_21392	III-DREB	461	51161.8	5.8	55.42	-0.282	Chloroplast	One
PITA_21543	RAV	256	28427.3	5.78	40.64	-0.652	Nucleus	None
PITA_21611	IX-ERF	703	75838.3	9.39	62.35	-0.669	Nucleus	None
PITA_21665	SOL	1925	215896	8.47	51.92	-0.713	Nucleus	None
PITA_21865	IX-ERF	237	26343.5	9.14	42.04	-0.736	Nucleus	None
PITA_21929	VII-ERF	175	19595.2	9.52	26.21	-0.657	Nucleus	None
PITA_21972	IX-ERF	212	23614.3	6.6	47.61	-0.707	Nucleus	None
PITA_22025	RAV	596	65163.8	8.03	44.59	-0.589	Nucleus	None
PITA_22192	III-DREB	399	43843.8	9.05	52.68	-0.381	Chloroplast	None
PITA_22354	II-DREB	375	42102.4	9.78	56.59	-0.469	Mitochondria	None
PITA_22465	III-DREB	280	31064.9	5.55	52.25	-0.566	Nucleus	None
PITA_22477	AP2	525	57741.3	8	55.04	-0.646	Nucleus	None
PITA_22509	IX-ERF	443	48728.3	10.12	67.7	-0.794	Nucleus	None
PITA_22634	III-DREB	245	27166.7	9.33	58.29	-0.583	Chloroplast	None
PITA_22928	VII-ERF	291	32872.7	9.47	32.29	-0.679	Nucleus	None
PITA_23504	IX-ERF	737	81514	8.01	43.95	-0.226	Nucleus	None
PITA_23893	III-DREB	198	21753.3	9.41	48.23	-0.653	Nucleus	None
PITA_24014	III-DREB	363	40658.2	6.34	50.02	-0.344	Chloroplast	None
PITA_24033	V-ERF	214	24585.5	5.59	54.39	-0.735	Nucleus	None
PITA_24062	II-DREB	255	28593.6	10.11	55.17	-0.538	Nucleus	None
PITA_24143	VII-ERF	163	18331.6	9.68	34.33	-0.848	Nucleus	None
PITA_24247	VIII-ERF	249	27773.7	7.65	54.56	-0.537	Cytoplasm	None
PITA_24252	IX-ERF	337	38324.3	5.43	56.41	-0.627	Nucleus	None
PITA_24497	AP2	234	26562.8	8.87	46.94	-0.924	Mitochondria	None
PITA_24554	VIII-ERF	419	47157.5	8.38	51.79	-0.542	Chloroplast	None
PITA_24646	II-DREB	194	22012.2	4.76	64.72	-0.794	Nucleus	None
PITA_24731	RAV	648	71374.4	6.79	47.33	-0.615	Nucleus	None
PITA_24988	VIII-ERF	220	24751.7	9.49	59.32	-0.862	Nucleus	None
PITA_25005	IX-ERF	366	40502.5	5.23	52.06	-0.416	Nucleus	None
PITA_25056	VII-ERF	163	18331.6	9.68	34.33	-0.848	Nucleus	None
PITA_25139	III-DREB	245	27166.7	9.33	58.29	-0.583	Chloroplast	None
PITA_25174	II-DREB	231	25791.8	4.68	46.38	-0.474	Nucleus	None
PITA_25177	III-DREB	255	27920.1	5.76	61.53	-0.652	Nucleus	None
PITA_25473	II-DREB	275	29859.3	8.27	63.34	-0.655	Nucleus	None
PITA_25668	III-DREB	245	27166.7	9.33	58.29	-0.583	Chloroplast	None
PITA_25673	IX-ERF	376	41901.2	5.17	53.23	-0.591	Nucleus	None
PITA_25834	AP2	129	14729.3	9.58	55.65	-1.174	Nucleus	None
PITA_26009	VII-ERF	169	19193	9.39	46.24	-0.679	Nucleus	None
PITA_26078	III-DREB	324	35612	6.03	62.5	-0.432	Nucleus	None
PITA_26170	IX-ERF	238	26659.7	5.9	48.14	-0.626	Nucleus	None
PITA_26369	VII-ERF	492	54347.5	6.35	51	-0.656	Nucleus	None
PITA_26441	VII-ERF	163	18331.6	9.68	34.33	-0.848	Nucleus	None
PITA_26485	X-ERF	392	44564.3	6.65	56.43	-0.932	Nucleus	None
PITA_26508	IX-ERF	236	27213.3	5.49	79.1	-0.9	Nucleus	None
PITA_26547	III-DREB	255	28503.7	5.18	65.94	-0.673	Nucleus	None
PITA_26603	III-DREB	233	26177.4	5.87	57.45	-0.643	Nucleus	None
PITA_26612	VII-ERF	175	19595.2	9.52	26.21	-0.657	Nucleus	None
PITA_26666	VII-ERF	175	19272.6	9.41	25.51	-0.697	Nucleus	None
PITA_26836	II-DREB	255	28205.7	5.77	58.38	-0.373	Nucleus	None
PITA_27078	III-DREB	318	34245.2	4.73	54.03	-0.367	Nucleus	None
PITA_27304	X-ERF	424	47605.8	5.72	50.14	-0.708	Nucleus	None
PITA_27461	II-DREB	175	19954.6	8.9	61.57	-0.669	Nucleus	None
PITA_27654	VII-ERF	163	18333.5	9.68	36.9	-0.865	Nucleus	None
PITA_27765	IX-ERF	467	51862.3	7.7	45.26	-0.53	Nucleus	None
PITA_27874	VIII-ERF	156	16998.7	9.67	54.03	-0.873	Nucleus	None
PITA_28016	IX-ERF	214	23826	9.22	38.36	-0.591	Nucleus	None
PITA_28041	III-DREB	412	44477.3	5.54	39.6	-0.078	Mitochondria	One
PITA_28146	II-DREB	210	24018.3	9.49	71.58	-0.796	Nucleus	None
PITA_28269	VIII-ERF	396	44721.5	9.49	57.76	-0.781	Cytoplasm	None
PITA_28422	VIII-ERF	307	33613.1	9.38	47.06	-0.5	Chloroplast	None
PITA_28617	VII-ERF	163	18331.6	9.68	34.33	-0.848	Nucleus	None
PITA_28685	II-DREB	194	21910.8	5.57	57.27	-0.479	Nucleus	None
PITA_28692	VII-ERF	169	19193	9.39	46.24	-0.679	Nucleus	None
PITA_29504	IX-ERF	218	24634.1	9.63	48.34	-0.837	Chloroplast	None
PITA_29833	VII-ERF	485	54005.2	5.23	54.09	-0.648	Nucleus	None
PITA_29961	VII-ERF	163	18331.6	9.68	34.33	-0.848	Nucleus	None
PITA_30026	VI-ERF	474	52728.8	4.93	58.9	-0.625	Chloroplast	None
PITA_30174	RAV	469	52297.8	7.62	44.74	-0.459	Chloroplast	None
PITA_30567	II-DREB	351	38188.6	6.84	64.18	-0.604	Nucleus	None
PITA_30609	AP2	250	28390.2	9.56	41.13	-0.825	Nucleus	None
PITA_30835	RAV	632	69902.9	6.69	49.58	-0.626	Nucleus	None
PITA_31258	X-ERF	363	41020.8	8.23	48.89	-0.755	Nucleus	None
PITA_31683	III-DREB	245	27166.7	9.33	58.29	-0.583	Chloroplast	None
PITA_31761	II-DREB	259	29578.2	8.61	53.49	-0.717	Nucleus	None
PITA_32088	VIII-ERF	364	41913.1	8.89	37.57	-0.35	Chloroplast	None
PITA_32145	RAV	501	55243.9	8.57	55.65	-0.549	Nucleus	None
PITA_32250	VII-ERF	175	19595.2	9.52	26.21	-0.657	Nucleus	None
PITA_32731	III-DREB	245	27166.7	9.33	58.29	-0.583	Chloroplast	None
PITA_32876	IX-ERF	294	32330.6	7.72	48.34	-0.896	Nucleus	None
PITA_33019	III-DREB	154	17456.9	9.63	63.51	-0.718	Mitochondria	None
PITA_33086	IX-ERF	196	21863.4	6.36	38.03	-0.683	Nucleus	None
PITA_33175	VII-ERF	375	40833.5	5.7	38.85	-0.575	Peroxisome	None
PITA_33747	IX-ERF	262	28907.1	5.17	43.97	-0.541	Nucleus	None
PITA_33816	IX-ERF	367	40350.5	6.37	61.23	-0.718	Nucleus	None
PITA_33872	III-DREB	245	27108.6	9.43	58.79	-0.562	Chloroplast	None
PITA_34240	VIII-ERF	187	21000.5	9.78	54.06	-0.656	Nucleus	None
PITA_34353	VII-ERF	163	18331.6	9.68	34.33	-0.848	Nucleus	None
PITA_34591	VII-ERF	229	25671.1	9.58	43.6	-0.873	Nucleus	None
PITA_34672	VIII-ERF	220	24362.7	8.99	54.24	-0.498	Nucleus	None
PITA_34957	VII-ERF	203	22964.5	7.55	33.29	-0.441	Cytoplasm	None
PITA_35223	III-DREB	220	24232.3	9.25	64.7	-0.569	Nucleus	None
PITA_35291	VII-ERF	163	18361.7	9.68	35.61	-0.833	Nucleus	None
PITA_35351	VII-ERF	168	18708.9	9.43	30.36	-0.823	Nucleus	None
PITA_35587	X-ERF	277	31373.1	8.5	35.67	-0.843	Nucleus	None
PITA_36015	AP2	234	26615.8	9.07	46.7	-0.954	Mitochondria	None
PITA_36019	II-DREB	202	22741.3	5.49	56	-0.673	Nucleus	None
PITA_36094	X-ERF	412	47227.3	7.36	59.98	-0.899	Nucleus	None
PITA_36290	VII-ERF	203	22964.5	7.55	33.29	-0.441	Cytoplasm	None
PITA_36346	II-DREB	181	20596.1	5.3	55.5	-0.613	Nucleus	None
PITA_36783	X-ERF	392	44321.2	6.54	48.31	-0.884	Nucleus	None
PITA_36833	IX-ERF	266	30269.3	8.35	62.67	-0.633	Nucleus	None
PITA_36862	AP2	432	47800.9	8.36	55.28	-0.609	Nucleus	None
PITA_37379	VIII-ERF	510	57120.3	5.46	62.26	-0.636	Nucleus	None
PITA_38160	VII-ERF	163	18347.6	9.68	35.78	-0.834	Nucleus	None
PITA_38405	X-ERF	389	43697.4	6.03	49.36	-0.749	Nucleus	None
PITA_38441	I-DREB	366	41742.8	7.73	48.4	-0.642	Nucleus	None
PITA_38619	II-DREB	181	19586	9.12	57.37	-0.518	Nucleus	None
PITA_38867	II-DREB	351	38184.8	8.53	63.81	-0.569	Nucleus	None
PITA_39167	III-DREB	213	23676.7	8.77	68.7	-0.507	Nucleus	None
PITA_39291	AP2	234	26517.6	8.72	47.35	-0.917	Mitochondria	None
PITA_39628	AP2	234	26629.8	8.71	47.71	-0.935	Mitochondria	None
PITA_39653	VII-ERF	163	18361.7	9.68	35.61	-0.833	Nucleus	None
PITA_39684	II-DREB	191	21212.7	9.24	49.29	-0.603	Chloroplast	None
PITA_40018	AP2	166	18878.3	9.84	27.7	-0.882	Cytoplasm	None
PITA_40580	IX-ERF	212	24800.5	9.7	38.79	-0.596	Mitochondria	None
PITA_40586	VII-ERF	456	50664.7	5.34	49.94	-0.526	Nucleus	None
PITA_40721	IV-DREB	531	59123.2	4.79	60.58	-0.787	Nucleus	None
PITA_40805	X-ERF	392	44228	6.24	45.97	-0.872	Nucleus	None
PITA_41122	IX-ERF	194	21027.6	8.24	35.65	-0.525	Nucleus	None
PITA_41204	VII-ERF	163	18301.5	9.68	34.33	-0.833	Nucleus	None
PITA_41215	II-DREB	176	20316	9.87	71.95	-1.01	Nucleus	None
PITA_41238	VII-ERF	388	43118.6	8.17	53.15	-0.63	Nucleus	None
PITA_41382	III-DREB	248	27584.7	5.62	57.2	-0.547	Nucleus	None
PITA_41413	VII-ERF	163	18371.7	9.68	36.69	-0.856	Nucleus	None
PITA_41955	VIII-ERF	174	18974.4	9.9	44.23	-0.671	Mitochondria	None
PITA_42024	III-DREB	249	27292.7	8.76	60.1	-0.498	Chloroplast	None
PITA_42051	AP2	431	48350.6	5.54	58.89	-0.7	Nucleus	None
PITA_42265	II-DREB	350	37954.5	6.8	63.44	-0.513	Nucleus	None
PITA_42370	IX-ERF	201	22375.6	9.74	50.63	-0.642	Nucleus	None
PITA_42417	AP2	368	41489.8	9.62	50.53	-0.708	Nucleus	None
PITA_42485	IX-ERF	253	27990.8	5.8	56.98	-0.753	Nucleus	None
PITA_42507	RAV	123	14032.7	5.61	53.45	-0.682	Chloroplast	None
PITA_42702	AP2	226	25741.1	9.33	43.81	-0.87	Mitochondria	None
PITA_42996	AP2	438	48314.2	8.55	49.23	-0.668	Nucleus	None
PITA_43386	IX-ERF	349	39433.7	5.33	65.36	-0.856	Nucleus	None
PITA_43404	IX-ERF	177	18897.1	8.98	37.74	-0.524	Nucleus	None
PITA_43652	VII-ERF	448	49543.9	4.93	50.44	-0.694	Nucleus	None
PITA_43679	III-DREB	245	27166.7	9.33	58.29	-0.583	Chloroplast	None
PITA_43769	I-DREB	381	41896.5	4.95	47.41	-0.427	Nucleus	None
PITA_43933	II-DREB	351	38292.7	7.18	62.28	-0.658	Nucleus	None
PITA_44206	III-DREB	285	31539.4	5.41	54.79	-0.504	Chloroplast	None
PITA_44360	II-DREB	442	49488.2	4.7	53.91	-0.443	Chloroplast	None
PITA_44447	II-DREB	333	37985.7	7.01	65.91	-0.711	Chloroplast	None
PITA_44750	AP2	753	82124.1	6.21	43.09	-0.722	Nucleus	None
PITA_44753	II-DREB	214	24254.9	5.33	68.67	-0.769	Nucleus	None
PITA_44782	II-DREB	228	25836.2	9.92	67.28	-0.83	Nucleus	None
PITA_44823	X-ERF	384	43030.6	5.94	49.12	-0.698	Nucleus	None
PITA_45092	AP2	234	26669.8	9.08	48.21	-0.971	Mitochondria	None
PITA_45859	IX-ERF	271	30314.2	5.87	63.07	-0.626	Nucleus	None
PITA_45922	VII-ERF	215	24403.1	6.89	33.85	-0.424	Cytoplasm	None
PITA_46065	IX-ERF	240	26466.5	7.11	56.11	-0.685	Nucleus	None
PITA_46155	III-DREB	245	27166.7	9.33	58.29	-0.583	Chloroplast	None
PITA_46332	X-ERF	441	48553.4	6.05	47.1	-0.714	Nucleus	None
PITA_46353	II-DREB	112	12509.4	10.16	52.93	-0.519	Chloroplast	None
PITA_46383	II-DREB	350	38057.6	6.8	64.96	-0.559	Nucleus	None
PITA_46540	VIII-ERF	203	22635.4	9.48	49.42	-0.534	Nucleus	None
PITA_47168	II-DREB	219	24973.8	5.08	70.99	-0.763	Nucleus	None
PITA_47647	RAV	501	54956.3	7.62	50.24	-0.537	Nucleus	None
PITA_47861	AP2	252	28606.1	8.49	47.03	-0.849	Mitochondria	None
PITA_47911	VIII-ERF	204	22686.2	5.69	58.64	-0.765	Nucleus	None
PITA_48037	VII-ERF	163	18331.6	9.68	34.33	-0.848	Nucleus	None
PITA_48410	III-DREB	245	27166.7	9.33	58.29	-0.583	Chloroplast	None
PITA_48723	AP2	226	25673	9.24	42.41	-0.85	Mitochondria	None
PITA_48797	III-DREB	255	28622.7	9.28	58.05	-0.403	Nucleus	None
PITA_48806	II-DREB	230	25837.6	5.33	50.95	-0.491	Chloroplast	None
PITA_49095	AP2	714	77921.5	8.47	50	-0.601	Nucleus	None
PITA_49133	RAV	583	66746.1	7.33	44.14	-0.577	Peroxisome	None
PITA_49270	IX-ERF	164	18291.9	10.26	42.36	-0.471	Chloroplast	None
PITA_49362	III-DREB	256	28457	5.86	55.77	-0.521	Nucleus	None
PITA_49473	II-DREB	236	25922.8	4.51	72.34	-0.467	Chloroplast	None
PITA_49848	IX-ERF	294	32803.5	7.62	51.94	-0.726	Nucleus	None
PITA_49904	VII-ERF	163	18331.6	9.68	34.33	-0.848	Nucleus	None
PITA_49958	VII-ERF	185	20859.2	9.02	32.85	-0.588	Cytoplasm	None
PITA_50024	III-DREB	369	41151.3	9.13	60.08	-0.54	Nucleus	None
PITA_50076	IX-ERF	236	26145.3	8.95	42.4	-0.714	Nucleus	None
PITA_50115	AP2	234	26629.8	8.71	47.71	-0.935	Mitochondria	None
PITA_50199	II-DREB	331	35985.2	6.47	63.09	-0.615	Nucleus	None
PITA_50216	III-DREB	709	78904.5	7.12	52.9	-0.108	Chloroplast	None
PITA_50272	II-DREB	239	26965.1	5.38	68.3	-0.505	Chloroplast	None
PITA_50513	V-ERF	209	23434.3	8.85	49.26	-0.77	Mitochondria	None
PITA_50663	II-DREB	375	42102.4	9.78	56.59	-0.469	Mitochondria	None
PITA_50717	VI-ERF	675	75974.4	6.88	67.55	-0.606	Nucleus	None
PITA_51087	AP2	234	26564.8	8.87	45.75	-0.899	Mitochondria	None
PITA_51224	III-DREB	245	27166.7	9.33	58.29	-0.583	Chloroplast	None
PITA_51232	VII-ERF	163	18361.7	9.68	35.61	-0.833	Nucleus	None
PITA_51465	VIII-ERF	200	21879.4	5.12	37.23	-0.752	Nucleus	None
PITA_51697	VIII-ERF	331	36346	9.43	59.71	-0.686	Nucleus	None
PITA_51750	I-DREB	479	53433.4	5.97	59.75	-0.816	Nucleus	None
