# Supplementary material for: Genome-wide identification and characterization of the AP2/ERF gene family in loblolly pine (Pinus taeda L.)
Source: PeerJ. 2024 May 21;12:e17388. doi: 10.7717/peerj.17388 (PMC11122039; doi:10.7717/peerj.17388)
Supplement: Supplemental Information 6 [file peerj-12-17388-s006.xlsx]

## Sheet: Sheet1 
Gene ID	Cis-element	Sequence	Position	Matrix score	Strand	Organism	Function description
PITA_00259	TCT-motif	TCTTAC	1619	6	+	Arabidopsis thaliana	part of a light responsive element
PITA_00259	TC-rich repeats	ATTCTCTAAC	756	9	+	Nicotiana tabacum	cis-acting element involved in defense and stress responsiveness
PITA_00259	AuxRR-core	GGTCCAT	544	7	+	Nicotiana tabacum	cis-acting regulatory element involved in auxin responsiveness
PITA_00259	ARE	AAACCA	778	6	+	Zea mays	cis-acting regulatory element essential for the anaerobic induction
PITA_00259	ARE	AAACCA	1042	6	+	Zea mays	cis-acting regulatory element essential for the anaerobic induction
PITA_00259	GATA-motif	AAGATAAGATT	596	10	+	Arabidopsis thaliana	part of a light responsive element
PITA_00259	LTR	CCGAAA	25	6	+	Hordeum vulgare	cis-acting element involved in low-temperature responsiveness
PITA_00259	LTR	CCGAAA	1806	6	-	Hordeum vulgare	cis-acting element involved in low-temperature responsiveness
PITA_00259	TCCC-motif	TCTCCCT	1180	7	+	Spinacia oleracea	part of a light responsive element
PITA_00259	TCCC-motif	TCTCCCT	1242	7	+	Spinacia oleracea	part of a light responsive element
PITA_00259	GARE-motif	TCTGTTG	729	7	+	Brassica oleracea	gibberellin-responsive element
PITA_00259	Gap-box	CAAATGAA(A/G)A	1750	9	-	Arabidopsis thaliana	part of a light responsive element
PITA_00259	AT-rich element	ATAGAAATCAA	1506	10	-	Glycine max	binding site of AT-rich DNA binding protein (ATBP-1)
PITA_00833	GARE-motif	TCTGTTG	404	7	+	Brassica oleracea	gibberellin-responsive element
PITA_00833	GC-motif	CCCCCG	1283	6	+	Zea mays	enhancer-like element involved in anoxic specific inducibility
PITA_00833	ABRE	ACGTG	166	5	-	Arabidopsis thaliana	cis-acting element involved in the abscisic acid responsiveness
PITA_00833	ABRE	ACGTG	210	5	-	Arabidopsis thaliana	cis-acting element involved in the abscisic acid responsiveness
PITA_00833	ABRE	ACGTG	1468	5	-	Arabidopsis thaliana	cis-acting element involved in the abscisic acid responsiveness
PITA_00833	ABRE	TACGGTC	1513	7	+	Arabidopsis thaliana	cis-acting element involved in the abscisic acid responsiveness
PITA_00833	ABRE	ACGTG	1888	5	-	Arabidopsis thaliana	cis-acting element involved in the abscisic acid responsiveness
PITA_00833	ABRE	ACGTG	1904	5	-	Arabidopsis thaliana	cis-acting element involved in the abscisic acid responsiveness
PITA_00833	G-Box	CACGTT	210	6	+	Pisum sativum	cis-acting regulatory element involved in light responsiveness
PITA_00833	G-Box	CACGTT	1468	6	+	Pisum sativum	cis-acting regulatory element involved in light responsiveness
PITA_00833	Box 4	ATTAAT	82	6	+	Petroselinum crispum	part of a conserved DNA module involved in light responsiveness
PITA_00833	Box 4	ATTAAT	1528	6	-	Petroselinum crispum	part of a conserved DNA module involved in light responsiveness
PITA_00833	TCT-motif	TCTTAC	1579	6	+	Arabidopsis thaliana	part of a light responsive element
PITA_00833	G-box	TACGTG	166	6	-	Arabidopsis thaliana	cis-acting regulatory element involved in light responsiveness
PITA_00833	G-box	CACGTC	1888	6	+	Zea mays	cis-acting regulatory element involved in light responsiveness
PITA_00833	G-box	CACGTC	1904	6	+	Zea mays	cis-acting regulatory element involved in light responsiveness
PITA_00833	CCAAT-box	CAACGG	1821	6	-	Hordeum vulgare	MYBHv1 binding site
PITA_00833	MBS	CAACTG	336	6	-	Arabidopsis thaliana	MYB binding site involved in drought-inducibility
PITA_00833	MBS	CAACTG	1709	6	-	Arabidopsis thaliana	MYB binding site involved in drought-inducibility
PITA_00833	MBS	CAACTG	1932	6	-	Arabidopsis thaliana	MYB binding site involved in drought-inducibility
PITA_00833	ARE	AAACCA	340	6	-	Zea mays	cis-acting regulatory element essential for the anaerobic induction
PITA_00833	ARE	AAACCA	456	6	+	Zea mays	cis-acting regulatory element essential for the anaerobic induction
PITA_00833	ARE	AAACCA	654	6	+	Zea mays	cis-acting regulatory element essential for the anaerobic induction
PITA_00833	ARE	AAACCA	868	6	-	Zea mays	cis-acting regulatory element essential for the anaerobic induction
PITA_00833	ARE	AAACCA	876	6	+	Zea mays	cis-acting regulatory element essential for the anaerobic induction
PITA_00833	ARE	AAACCA	892	6	-	Zea mays	cis-acting regulatory element essential for the anaerobic induction
PITA_00833	ARE	AAACCA	1567	6	+	Zea mays	cis-acting regulatory element essential for the anaerobic induction
PITA_00833	ARE	AAACCA	1809	6	-	Zea mays	cis-acting regulatory element essential for the anaerobic induction
PITA_00833	GATA-motif	AAGATAAGATT	1053	10	-	Arabidopsis thaliana	part of a light responsive element
PITA_00833	Sp1	GGGCGG	1767	6	+	Oryza sativa	light responsive element
PITA_00907	ABRE	CGCACGTGTC	1688	9	+	Hordeum vulgare	cis-acting element involved in the abscisic acid responsiveness
PITA_00907	ABRE	CACGTG	1690	6	-	Arabidopsis thaliana	cis-acting element involved in the abscisic acid responsiveness
PITA_00907	ABRE	ACGTG	1691	5	+	Arabidopsis thaliana	cis-acting element involved in the abscisic acid responsiveness
PITA_00907	ABRE	ACGTG	1719	5	-	Arabidopsis thaliana	cis-acting element involved in the abscisic acid responsiveness
PITA_00907	ABRE	ACGTG	1849	5	+	Arabidopsis thaliana	cis-acting element involved in the abscisic acid responsiveness
PITA_00907	TGACG-motif	TGACG	930	5	-	Hordeum vulgare	cis-acting regulatory element involved in the MeJA-responsiveness
PITA_00907	TGACG-motif	TGACG	1365	5	-	Hordeum vulgare	cis-acting regulatory element involved in the MeJA-responsiveness
PITA_00907	TGACG-motif	TGACG	1785	5	+	Hordeum vulgare	cis-acting regulatory element involved in the MeJA-responsiveness
PITA_00907	CGTCA-motif	CGTCA	930	5	+	Hordeum vulgare	cis-acting regulatory element involved in the MeJA-responsiveness
PITA_00907	CGTCA-motif	CGTCA	1365	5	+	Hordeum vulgare	cis-acting regulatory element involved in the MeJA-responsiveness
PITA_00907	CGTCA-motif	CGTCA	1785	5	-	Hordeum vulgare	cis-acting regulatory element involved in the MeJA-responsiveness
PITA_00907	AE-box	AGAAACTT	476	8	+	Arabidopsis thaliana	part of a module for light response
PITA_00907	GC-motif	CCCCCG	162	6	+	Zea mays	enhancer-like element involved in anoxic specific inducibility
PITA_00907	MSA-like	(T/C)C(T/C)AACGG(T/C)(T/C)A	990	9	+	Catharanthus roseus	cis-acting element involved in cell cycle regulation
PITA_00907	MSA-like	(T/C)C(T/C)AACGG(T/C)(T/C)A	1006	8.5	+	Catharanthus roseus	cis-acting element involved in cell cycle regulation
PITA_00907	I-box	cCATATCCAAT	597	10	-	Flaveria trinervia	part of a light responsive element
PITA_00907	LTR	CCGAAA	657	6	-	Hordeum vulgare	cis-acting element involved in low-temperature responsiveness
PITA_00907	LTR	CCGAAA	1102	6	+	Hordeum vulgare	cis-acting element involved in low-temperature responsiveness
PITA_00907	LTR	CCGAAA	1327	6	-	Hordeum vulgare	cis-acting element involved in low-temperature responsiveness
PITA_00907	Sp1	GGGCGG	708	6	-	Oryza sativa	light responsive element
PITA_00907	ARE	AAACCA	743	6	-	Zea mays	cis-acting regulatory element essential for the anaerobic induction
PITA_00907	ARE	AAACCA	909	6	+	Zea mays	cis-acting regulatory element essential for the anaerobic induction
PITA_00907	ARE	AAACCA	1041	6	+	Zea mays	cis-acting regulatory element essential for the anaerobic induction
PITA_00907	ARE	AAACCA	1562	6	+	Zea mays	cis-acting regulatory element essential for the anaerobic induction
PITA_00907	TCA-element	CCATCTTTTT	1890	9	-	Nicotiana tabacum	cis-acting element involved in salicylic acid responsiveness
PITA_00907	MBS	CAACTG	256	6	+	Arabidopsis thaliana	MYB binding site involved in drought-inducibility
PITA_00907	MBS	CAACTG	1639	6	-	Arabidopsis thaliana	MYB binding site involved in drought-inducibility
PITA_00907	CCAAT-box	CAACGG	992	6	+	Hordeum vulgare	MYBHv1 binding site
PITA_00907	TC-rich repeats	ATTCTCTAAC	1174	9	+	Nicotiana tabacum	cis-acting element involved in defense and stress responsiveness
PITA_00907	G-Box	CACGTG	1690	6	-	Pisum sativum	cis-acting regulatory element involved in light responsiveness
PITA_00907	G-Box	CACGTT	1719	6	+	Pisum sativum	cis-acting regulatory element involved in light responsiveness
PITA_00907	G-Box	CACGTT	1848	6	-	Pisum sativum	cis-acting regulatory element involved in light responsiveness
PITA_00907	G-box	CAGACGTGGCA	116	10	+	Nicotiana plumbaginifolia	cis-acting regulatory element involved in light responsiveness
PITA_00907	G-box	CACGTG	1690	6	-	Arabidopsis thaliana	cis-acting regulatory element involved in light responsiveness
PITA_00907	Box 4	ATTAAT	1150	6	-	Petroselinum crispum	part of a conserved DNA module involved in light responsiveness
PITA_00907	Box 4	ATTAAT	1473	6	-	Petroselinum crispum	part of a conserved DNA module involved in light responsiveness
PITA_00907	TCT-motif	TCTTAC	1492	6	+	Arabidopsis thaliana	part of a light responsive element
PITA_00931	O2-site	GATGATGTGG	438	9	+	Zea mays	cis-acting regulatory element involved in zein metabolism regulation
PITA_00931	TGA-element	AACGAC	1034	6	+	Brassica oleracea	auxin-responsive element
PITA_00931	TGA-element	AACGAC	1795	6	-	Brassica oleracea	auxin-responsive element
PITA_00931	AE-box	AGAAACAA	1558	8	-	Arabidopsis thaliana	part of a module for light response
PITA_00931	Box 4	ATTAAT	829	6	+	Petroselinum crispum	part of a conserved DNA module involved in light responsiveness
PITA_00931	Box 4	ATTAAT	1438	6	-	Petroselinum crispum	part of a conserved DNA module involved in light responsiveness
PITA_00931	CCAAT-box	CAACGG	1202	6	-	Hordeum vulgare	MYBHv1 binding site
PITA_00931	CAT-box	GCCACT	1579	6	-	Arabidopsis thaliana	cis-acting regulatory element related to meristem expression
PITA_00931	ATCT-motif	AATCTAATCC	81	10	-	Pisum sativum	part of a conserved DNA module involved in light responsiveness
PITA_00931	ATCT-motif	AATCTAATCC	232	10	-	Pisum sativum	part of a conserved DNA module involved in light responsiveness
PITA_00931	ATCT-motif	AATCTAATCC	489	10	-	Pisum sativum	part of a conserved DNA module involved in light responsiveness
PITA_00931	ATCT-motif	AATCTAATCC	626	9	-	Pisum sativum	part of a conserved DNA module involved in light responsiveness
PITA_00931	MBS	CAACTG	1463	6	+	Arabidopsis thaliana	MYB binding site involved in drought-inducibility
PITA_00931	chs-CMA2a	TCACTTGA	1905	8	-	Petroselinum crispum	part of a light responsive element
PITA_00931	GATA-motif	GATAGGA	1020	7	-	Arabidopsis thaliana	part of a light responsive element
PITA_01000	TATC-box	TATCCCA	1783	7	+	Oryza sativa	cis-acting element involved in gibberellin-responsiveness
PITA_01000	G-Box	CACGTT	834	6	+	Pisum sativum	cis-acting regulatory element involved in light responsiveness
PITA_01000	Box II	ACACGTTGT	833	9	+	Sinapis alba	part of a light responsive element
PITA_01000	Box 4	ATTAAT	315	6	+	Petroselinum crispum	part of a conserved DNA module involved in light responsiveness
PITA_01000	Box 4	ATTAAT	1412	6	-	Petroselinum crispum	part of a conserved DNA module involved in light responsiveness
PITA_01000	GATA-motif	GATAGGA	1130	7	-	Arabidopsis thaliana	part of a light responsive element
PITA_01000	TCA-element	TCAGAAGAGG	255	9	+	Brassica oleracea	cis-acting element involved in salicylic acid responsiveness
PITA_01000	MBS	CAACTG	234	6	+	Arabidopsis thaliana	MYB binding site involved in drought-inducibility
PITA_01000	MBS	CAACTG	247	6	-	Arabidopsis thaliana	MYB binding site involved in drought-inducibility
PITA_01000	MBS	CAACTG	793	6	-	Arabidopsis thaliana	MYB binding site involved in drought-inducibility
PITA_01000	MBS	CAACTG	972	6	-	Arabidopsis thaliana	MYB binding site involved in drought-inducibility
PITA_01000	MBS	CAACTG	1429	6	+	Arabidopsis thaliana	MYB binding site involved in drought-inducibility
PITA_01000	GT1-motif	GGTTAAT	1075	7	-	Avena sativa	light responsive element
PITA_01000	GT1-motif	GGTTAA	1076	6	-	Arabidopsis thaliana	light responsive element
PITA_01000	GT1-motif	GGTTAA	1229	6	-	Arabidopsis thaliana	light responsive element
PITA_01000	ATCT-motif	AATCTAATCC	657	9	+	Pisum sativum	part of a conserved DNA module involved in light responsiveness
PITA_01000	A-box	CCGTCC	1581	6	+	Petroselinum crispum	cis-acting regulatory element
PITA_01000	AuxRE	TGTCTCAATAAG	1016	11	+	Glycine max	part of an auxin-responsive element
PITA_01000	ABRE	ACGTG	834	5	-	Arabidopsis thaliana	cis-acting element involved in the abscisic acid responsiveness
PITA_01000	TGA-element	AACGAC	103	6	+	Brassica oleracea	auxin-responsive element
PITA_01000	MRE	AACCTAA	511	7	-	Petroselinum crispum	MYB binding site involved in light responsiveness
PITA_01000	MRE	AACCTAA	525	7	-	Petroselinum crispum	MYB binding site involved in light responsiveness
PITA_01007	Sp1	GGGCGG	1893	6	+	Oryza sativa	light responsive element
PITA_01007	MBS	CAACTG	1997	6	+	Arabidopsis thaliana	MYB binding site involved in drought-inducibility
PITA_01007	ARE	AAACCA	452	6	-	Zea mays	cis-acting regulatory element essential for the anaerobic induction
PITA_01007	ARE	AAACCA	1171	6	+	Zea mays	cis-acting regulatory element essential for the anaerobic induction
PITA_01007	ARE	AAACCA	1448	6	+	Zea mays	cis-acting regulatory element essential for the anaerobic induction
PITA_01007	ARE	AAACCA	1578	6	+	Zea mays	cis-acting regulatory element essential for the anaerobic induction
PITA_01007	ARE	AAACCA	1695	6	-	Zea mays	cis-acting regulatory element essential for the anaerobic induction
PITA_01007	ARE	AAACCA	1726	6	-	Zea mays	cis-acting regulatory element essential for the anaerobic induction
PITA_01007	ARE	AAACCA	1745	6	-	Zea mays	cis-acting regulatory element essential for the anaerobic induction
PITA_01007	ATCT-motif	AATCTAATCC	1706	9	+	Pisum sativum	part of a conserved DNA module involved in light responsiveness
PITA_01007	GT1-motif	GGTTAA	102	6	-	Arabidopsis thaliana	light responsive element
PITA_01007	GCN4_motif	TGAGTCA	1937	7	-	Oryza sativa	cis-regulatory element involved in endosperm expression
PITA_01007	TCT-motif	TCTTAC	193	6	+	Arabidopsis thaliana	part of a light responsive element
PITA_01007	TCT-motif	TCTTAC	718	6	-	Arabidopsis thaliana	part of a light responsive element
PITA_01007	Box 4	ATTAAT	405	6	+	Petroselinum crispum	part of a conserved DNA module involved in light responsiveness
PITA_01007	Box 4	ATTAAT	768	6	+	Petroselinum crispum	part of a conserved DNA module involved in light responsiveness
PITA_01007	Box 4	ATTAAT	969	6	+	Petroselinum crispum	part of a conserved DNA module involved in light responsiveness
PITA_01007	Box 4	ATTAAT	1392	6	-	Petroselinum crispum	part of a conserved DNA module involved in light responsiveness
PITA_01007	Box 4	ATTAAT	1457	6	-	Petroselinum crispum	part of a conserved DNA module involved in light responsiveness
PITA_01007	Box 4	ATTAAT	1594	6	-	Petroselinum crispum	part of a conserved DNA module involved in light responsiveness
PITA_01007	Box 4	ATTAAT	1666	6	-	Petroselinum crispum	part of a conserved DNA module involved in light responsiveness
PITA_01007	Box 4	ATTAAT	1756	6	-	Petroselinum crispum	part of a conserved DNA module involved in light responsiveness
PITA_01007	Box 4	ATTAAT	1760	6	-	Petroselinum crispum	part of a conserved DNA module involved in light responsiveness
PITA_01007	AT-rich element	ATAGAAATCAA	1013	10	+	Glycine max	binding site of AT-rich DNA binding protein (ATBP-1)
PITA_01007	SARE	TTCGACCATCTT	1906	11	-	Nicotiana tabacum	cis-acting element involved in salicylic acid responsiveness
PITA_01007	AT1-motif	AATTATTTTTTATT	1611	13	+	Solanum tuberosum	part of a light responsive module
PITA_01007	TGACG-motif	TGACG	911	5	-	Hordeum vulgare	cis-acting regulatory element involved in the MeJA-responsiveness
PITA_01007	TGACG-motif	TGACG	1845	5	-	Hordeum vulgare	cis-acting regulatory element involved in the MeJA-responsiveness
PITA_01007	CGTCA-motif	CGTCA	911	5	+	Hordeum vulgare	cis-acting regulatory element involved in the MeJA-responsiveness
PITA_01007	CGTCA-motif	CGTCA	1845	5	+	Hordeum vulgare	cis-acting regulatory element involved in the MeJA-responsiveness
PITA_01007	GA-motif	ATAGATAA	32	8	-	Arabidopsis thaliana	part of a light responsive element
PITA_01074	Box 4	ATTAAT	1105	6	-	Petroselinum crispum	part of a conserved DNA module involved in light responsiveness
PITA_01074	Box 4	ATTAAT	1121	6	-	Petroselinum crispum	part of a conserved DNA module involved in light responsiveness
PITA_01074	TGACG-motif	TGACG	1793	5	+	Hordeum vulgare	cis-acting regulatory element involved in the MeJA-responsiveness
PITA_01074	GC-motif	CCCCCG	285	6	+	Zea mays	enhancer-like element involved in anoxic specific inducibility
PITA_01074	CAT-box	GCCACT	1784	6	+	Arabidopsis thaliana	cis-acting regulatory element related to meristem expression
PITA_01074	ABRE	ACGTG	1772	5	-	Arabidopsis thaliana	cis-acting element involved in the abscisic acid responsiveness
PITA_01074	G-Box	CACGTT	1772	6	+	Pisum sativum	cis-acting regulatory element involved in light responsiveness
PITA_01074	CGTCA-motif	CGTCA	1793	5	-	Hordeum vulgare	cis-acting regulatory element involved in the MeJA-responsiveness
PITA_01074	GT1-motif	GGTTAA	1143	6	+	Arabidopsis thaliana	light responsive element
PITA_01074	GT1-motif	GGTTAAT	1453	7	-	Avena sativa	light responsive element
PITA_01074	GT1-motif	GGTTAA	1454	6	-	Arabidopsis thaliana	light responsive element
PITA_01074	G-box	TAAACGTG	1772	8	-	Brassica oleracea	cis-acting regulatory element involved in light responsiveness
PITA_01074	ACE	GACACGTATG	1855	9	+	Petroselinum crispum	cis-acting element involved in light responsiveness
PITA_01074	TCCC-motif	TCTCCCT	54	7	-	Spinacia oleracea	part of a light responsive element
PITA_01074	ARE	AAACCA	725	6	+	Zea mays	cis-acting regulatory element essential for the anaerobic induction
PITA_01074	ARE	AAACCA	888	6	+	Zea mays	cis-acting regulatory element essential for the anaerobic induction
PITA_01074	ARE	AAACCA	1425	6	+	Zea mays	cis-acting regulatory element essential for the anaerobic induction
PITA_01074	O2-site	GTTGACGTGA	1565	9	-	Zea mays	cis-acting regulatory element involved in zein metabolism regulation
PITA_01074	chs-CMA2a	TCACTTGA	9	8	-	Petroselinum crispum	part of a light responsive element
PITA_01074	GARE-motif	TCTGTTG	756	7	+	Brassica oleracea	gibberellin-responsive element
PITA_01156	GATA-motif	GATAGGA	1397	7	+	Arabidopsis thaliana	part of a light responsive element
PITA_01156	GT1-motif	GGTTAAT	523	7	+	Avena sativa	light responsive element
PITA_01156	GT1-motif	GGTTAA	912	6	+	Arabidopsis thaliana	light responsive element
PITA_01156	ARE	AAACCA	606	6	-	Zea mays	cis-acting regulatory element essential for the anaerobic induction
PITA_01156	ARE	AAACCA	1147	6	-	Zea mays	cis-acting regulatory element essential for the anaerobic induction
PITA_01156	LS7	CAGATTTATTTTTA	452	13	-	Zea mays	part of a light responsive element
PITA_01156	TC-rich repeats	ATTCTCTAAC	147	9	+	Nicotiana tabacum	cis-acting element involved in defense and stress responsiveness
PITA_01156	G-box	CACGTC	1660	6	+	Zea mays	cis-acting regulatory element involved in light responsiveness
PITA_01156	Box 4	ATTAAT	172	6	+	Petroselinum crispum	part of a conserved DNA module involved in light responsiveness
PITA_01156	Box 4	ATTAAT	217	6	+	Petroselinum crispum	part of a conserved DNA module involved in light responsiveness
PITA_01156	Box 4	ATTAAT	645	6	+	Petroselinum crispum	part of a conserved DNA module involved in light responsiveness
PITA_01156	Box 4	ATTAAT	666	6	+	Petroselinum crispum	part of a conserved DNA module involved in light responsiveness
PITA_01156	Box 4	ATTAAT	778	6	+	Petroselinum crispum	part of a conserved DNA module involved in light responsiveness
PITA_01156	CGTCA-motif	CGTCA	1662	5	+	Hordeum vulgare	cis-acting regulatory element involved in the MeJA-responsiveness
PITA_01156	CGTCA-motif	CGTCA	1943	5	+	Hordeum vulgare	cis-acting regulatory element involved in the MeJA-responsiveness
PITA_01156	ABRE	ACGTG	1660	5	-	Arabidopsis thaliana	cis-acting element involved in the abscisic acid responsiveness
PITA_01156	chs-CMA1a	TTACTTAA	243	8	-	Daucus carota	part of a light responsive element
PITA_01156	TGACG-motif	TGACG	1662	5	-	Hordeum vulgare	cis-acting regulatory element involved in the MeJA-responsiveness
PITA_01156	TGACG-motif	TGACG	1943	5	-	Hordeum vulgare	cis-acting regulatory element involved in the MeJA-responsiveness
PITA_01156	AT1-motif	AATTATTTTTTATT	787	13	-	Solanum tuberosum	part of a light responsive module
PITA_01156	LAMP-element	CTTTATCA	1174	8	-	Pisum sativum	part of a light responsive element
PITA_01156	TGA-element	AACGAC	1388	6	+	Brassica oleracea	auxin-responsive element
PITA_01156	TGA-element	AACGAC	1472	6	+	Brassica oleracea	auxin-responsive element
PITA_01270	G-Box	CACGTT	608	6	-	Pisum sativum	cis-acting regulatory element involved in light responsiveness
PITA_01270	G-Box	CACGTT	1855	6	-	Pisum sativum	cis-acting regulatory element involved in light responsiveness
PITA_01270	GCN4_motif	TGAGTCA	644	7	-	Oryza sativa	cis-regulatory element involved in endosperm expression
PITA_01270	G-box	CACGAC	1031	6	+	Zea mays	cis-acting regulatory element involved in light responsiveness
PITA_01270	G-box	TACGTG	1687	6	+	Arabidopsis thaliana	cis-acting regulatory element involved in light responsiveness
PITA_01270	Box 4	ATTAAT	1182	6	-	Petroselinum crispum	part of a conserved DNA module involved in light responsiveness
PITA_01270	Box 4	ATTAAT	1219	6	-	Petroselinum crispum	part of a conserved DNA module involved in light responsiveness
PITA_01270	Box 4	ATTAAT	1477	6	-	Petroselinum crispum	part of a conserved DNA module involved in light responsiveness
PITA_01270	Box 4	ATTAAT	1575	6	-	Petroselinum crispum	part of a conserved DNA module involved in light responsiveness
PITA_01270	Box 4	ATTAAT	1579	6	-	Petroselinum crispum	part of a conserved DNA module involved in light responsiveness
PITA_01270	Box 4	ATTAAT	1626	6	-	Petroselinum crispum	part of a conserved DNA module involved in light responsiveness
PITA_01270	TC-rich repeats	GTTTTCTTAC	710	9	-	Nicotiana tabacum	cis-acting element involved in defense and stress responsiveness
PITA_01270	TC-rich repeats	GTTTTCTTAC	738	9	-	Nicotiana tabacum	cis-acting element involved in defense and stress responsiveness
PITA_01270	ARE	AAACCA	174	6	+	Zea mays	cis-acting regulatory element essential for the anaerobic induction
PITA_01270	ARE	AAACCA	184	6	-	Zea mays	cis-acting regulatory element essential for the anaerobic induction
PITA_01270	ARE	AAACCA	569	6	+	Zea mays	cis-acting regulatory element essential for the anaerobic induction
PITA_01270	ARE	AAACCA	689	6	+	Zea mays	cis-acting regulatory element essential for the anaerobic induction
PITA_01270	ARE	AAACCA	853	6	+	Zea mays	cis-acting regulatory element essential for the anaerobic induction
PITA_01270	ARE	AAACCA	1553	6	-	Zea mays	cis-acting regulatory element essential for the anaerobic induction
PITA_01270	GATA-motif	AAGATAAGATT	294	10	-	Arabidopsis thaliana	part of a light responsive element
PITA_01270	GATA-motif	AAGATAAGATT	1201	10	+	Arabidopsis thaliana	part of a light responsive element
PITA_01270	I-box	gGATAAGGTG	502	9	+	Zea mays	part of a light responsive element
PITA_01270	chs-CMA2c	ATATACGTGAAGG	1684	12	+	Daucus carota	part of a light responsive element
PITA_01270	ABRE	ACGTG	609	5	+	Arabidopsis thaliana	cis-acting element involved in the abscisic acid responsiveness
PITA_01270	ABRE	ACGTG	1688	5	+	Arabidopsis thaliana	cis-acting element involved in the abscisic acid responsiveness
PITA_01270	ABRE	ACGTG	1856	5	+	Arabidopsis thaliana	cis-acting element involved in the abscisic acid responsiveness
PITA_01270	TGACG-motif	TGACG	1192	5	+	Hordeum vulgare	cis-acting regulatory element involved in the MeJA-responsiveness
PITA_01270	CGTCA-motif	CGTCA	1192	5	-	Hordeum vulgare	cis-acting regulatory element involved in the MeJA-responsiveness
PITA_01270	P-box	CCTTTTG	422	7	+	Oryza sativa	gibberellin-responsive element
PITA_01484	I-box	GTATAAGGCC	1752	9	-	Larix laricina	part of a light responsive element
PITA_01484	Box 4	ATTAAT	1554	6	-	Petroselinum crispum	part of a conserved DNA module involved in light responsiveness
PITA_01484	Box 4	ATTAAT	1688	6	-	Petroselinum crispum	part of a conserved DNA module involved in light responsiveness
PITA_01484	TCT-motif	TCTTAC	1788	6	-	Arabidopsis thaliana	part of a light responsive element
PITA_01484	TCT-motif	TCTTAC	1900	6	+	Arabidopsis thaliana	part of a light responsive element
PITA_01484	GARE-motif	TCTGTTG	1586	7	-	Brassica oleracea	gibberellin-responsive element
PITA_01592	CGTCA-motif	CGTCA	1017	5	+	Hordeum vulgare	cis-acting regulatory element involved in the MeJA-responsiveness
PITA_01592	CGTCA-motif	CGTCA	1033	5	-	Hordeum vulgare	cis-acting regulatory element involved in the MeJA-responsiveness
PITA_01592	CGTCA-motif	CGTCA	1281	5	-	Hordeum vulgare	cis-acting regulatory element involved in the MeJA-responsiveness
PITA_01592	CGTCA-motif	CGTCA	1298	5	+	Hordeum vulgare	cis-acting regulatory element involved in the MeJA-responsiveness
PITA_01592	CGTCA-motif	CGTCA	1357	5	-	Hordeum vulgare	cis-acting regulatory element involved in the MeJA-responsiveness
PITA_01592	CGTCA-motif	CGTCA	1447	5	+	Hordeum vulgare	cis-acting regulatory element involved in the MeJA-responsiveness
PITA_01592	CGTCA-motif	CGTCA	1538	5	-	Hordeum vulgare	cis-acting regulatory element involved in the MeJA-responsiveness
PITA_01592	CGTCA-motif	CGTCA	1685	5	-	Hordeum vulgare	cis-acting regulatory element involved in the MeJA-responsiveness
PITA_01592	TGACG-motif	TGACG	1017	5	-	Hordeum vulgare	cis-acting regulatory element involved in the MeJA-responsiveness
PITA_01592	TGACG-motif	TGACG	1033	5	+	Hordeum vulgare	cis-acting regulatory element involved in the MeJA-responsiveness
PITA_01592	TGACG-motif	TGACG	1281	5	+	Hordeum vulgare	cis-acting regulatory element involved in the MeJA-responsiveness
PITA_01592	TGACG-motif	TGACG	1298	5	-	Hordeum vulgare	cis-acting regulatory element involved in the MeJA-responsiveness
PITA_01592	TGACG-motif	TGACG	1357	5	+	Hordeum vulgare	cis-acting regulatory element involved in the MeJA-responsiveness
PITA_01592	TGACG-motif	TGACG	1447	5	-	Hordeum vulgare	cis-acting regulatory element involved in the MeJA-responsiveness
PITA_01592	TGACG-motif	TGACG	1538	5	+	Hordeum vulgare	cis-acting regulatory element involved in the MeJA-responsiveness
PITA_01592	TGACG-motif	TGACG	1685	5	+	Hordeum vulgare	cis-acting regulatory element involved in the MeJA-responsiveness
PITA_01592	ABRE	ACGTG	1283	5	+	Arabidopsis thaliana	cis-acting element involved in the abscisic acid responsiveness
PITA_01592	GA-motif	ATAGATAA	1391	8	-	Arabidopsis thaliana	part of a light responsive element
PITA_01592	A-box	CCGTCC	1364	6	-	Petroselinum crispum	cis-acting regulatory element
PITA_01592	GATA-motif	GATAGGG	367	7	-	Pisum sativum	part of a light responsive element
PITA_01592	GT1-motif	GTGTGTGAA	1510	9	+	Solanum tuberosum	light responsive element
PITA_01592	TATC-box	TATCCCA	1808	7	+	Oryza sativa	cis-acting element involved in gibberellin-responsiveness
PITA_01592	Box 4	ATTAAT	72	6	+	Petroselinum crispum	part of a conserved DNA module involved in light responsiveness
PITA_01592	Box 4	ATTAAT	173	6	+	Petroselinum crispum	part of a conserved DNA module involved in light responsiveness
PITA_01592	Box 4	ATTAAT	311	6	+	Petroselinum crispum	part of a conserved DNA module involved in light responsiveness
PITA_01592	Box 4	ATTAAT	681	6	+	Petroselinum crispum	part of a conserved DNA module involved in light responsiveness
PITA_01592	Box 4	ATTAAT	699	6	+	Petroselinum crispum	part of a conserved DNA module involved in light responsiveness
PITA_01592	G-box	CACGTC	1282	6	-	Zea mays	cis-acting regulatory element involved in light responsiveness
PITA_01616	ARE	AAACCA	63	6	+	Zea mays	cis-acting regulatory element essential for the anaerobic induction
PITA_01616	ARE	AAACCA	507	6	+	Zea mays	cis-acting regulatory element essential for the anaerobic induction
PITA_01616	ARE	AAACCA	685	6	+	Zea mays	cis-acting regulatory element essential for the anaerobic induction
PITA_01616	ARE	AAACCA	883	6	+	Zea mays	cis-acting regulatory element essential for the anaerobic induction
PITA_01616	ARE	AAACCA	893	6	+	Zea mays	cis-acting regulatory element essential for the anaerobic induction
PITA_01616	ARE	AAACCA	1194	6	-	Zea mays	cis-acting regulatory element essential for the anaerobic induction
PITA_01616	ARE	AAACCA	1541	6	+	Zea mays	cis-acting regulatory element essential for the anaerobic induction
PITA_01616	TCA-element	TCAGAAGAGG	1694	9	+	Brassica oleracea	cis-acting element involved in salicylic acid responsiveness
PITA_01616	MBS	CAACTG	459	6	+	Arabidopsis thaliana	MYB binding site involved in drought-inducibility
PITA_01616	GATA-motif	AAGGATAAGG	1467	9	+	Solanum tuberosum	part of a light responsive element
PITA_01616	G-Box	CACGTT	1559	6	+	Pisum sativum	cis-acting regulatory element involved in light responsiveness
PITA_01616	G-box	TACGTG	1015	6	+	Arabidopsis thaliana	cis-acting regulatory element involved in light responsiveness
PITA_01616	G-box	TACGTG	1053	6	+	Arabidopsis thaliana	cis-acting regulatory element involved in light responsiveness
PITA_01616	G-box	TACGTG	1831	6	+	Arabidopsis thaliana	cis-acting regulatory element involved in light responsiveness
PITA_01616	TATC-box	TATCCCA	1947	7	+	Oryza sativa	cis-acting element involved in gibberellin-responsiveness
PITA_01616	MRE	AACCTAA	1972	7	+	Petroselinum crispum	MYB binding site involved in light responsiveness
PITA_01616	chs-Unit 1 m1	ACCTAACCCGC	509	10	+	Hordeum vulgare	part of a light responsive element
PITA_01616	ATC-motif	AGTAATCT	1505	8	+	Spinacia oleracea	part of a conserved DNA module involved in light responsiveness
PITA_01616	AE-box	AGAAACAA	80	8	-	Arabidopsis thaliana	part of a module for light response
PITA_01616	AE-box	AGAAACTT	102	8	+	Arabidopsis thaliana	part of a module for light response
PITA_01616	TGACG-motif	TGACG	933	5	+	Hordeum vulgare	cis-acting regulatory element involved in the MeJA-responsiveness
PITA_01616	ABRE	TACGGTC	944	7	+	Arabidopsis thaliana	cis-acting element involved in the abscisic acid responsiveness
PITA_01616	ABRE	ACGTG	1016	5	+	Arabidopsis thaliana	cis-acting element involved in the abscisic acid responsiveness
PITA_01616	ABRE	ACGTG	1054	5	+	Arabidopsis thaliana	cis-acting element involved in the abscisic acid responsiveness
PITA_01616	ABRE	ACGTG	1559	5	-	Arabidopsis thaliana	cis-acting element involved in the abscisic acid responsiveness
PITA_01616	ABRE	ACGTG	1832	5	+	Arabidopsis thaliana	cis-acting element involved in the abscisic acid responsiveness
PITA_01616	CGTCA-motif	CGTCA	933	5	-	Hordeum vulgare	cis-acting regulatory element involved in the MeJA-responsiveness
PITA_01616	I-box	GTATAAGGCC	859	9	-	Larix laricina	part of a light responsive element
PITA_01616	I-box	ccttatcct	1468	9	-	Arabidopsis thaliana	part of a light responsive element
PITA_01616	GARE-motif	TCTGTTG	1572	7	-	Brassica oleracea	gibberellin-responsive element
PITA_01616	O2-site	GATGACATGG	688	9	-	Zea mays	cis-acting regulatory element involved in zein metabolism regulation
PITA_02042	G-box	CACGAC	766	6	-	Zea mays	cis-acting regulatory element involved in light responsiveness
PITA_02042	G-box	CACGAC	1772	6	-	Zea mays	cis-acting regulatory element involved in light responsiveness
PITA_02042	TCT-motif	TCTTAC	706	6	-	Arabidopsis thaliana	part of a light responsive element
PITA_02042	Box 4	ATTAAT	1423	6	-	Petroselinum crispum	part of a conserved DNA module involved in light responsiveness
PITA_02042	Box 4	ATTAAT	1782	6	-	Petroselinum crispum	part of a conserved DNA module involved in light responsiveness
PITA_02042	TC-rich repeats	GTTTTCTTAC	706	9	-	Nicotiana tabacum	cis-acting element involved in defense and stress responsiveness
PITA_02042	CCAAT-box	CAACGG	1973	6	+	Hordeum vulgare	MYBHv1 binding site
PITA_02042	ARE	AAACCA	1641	6	+	Zea mays	cis-acting regulatory element essential for the anaerobic induction
PITA_02042	MBS	CAACTG	622	6	-	Arabidopsis thaliana	MYB binding site involved in drought-inducibility
PITA_02042	chs-CMA2a	TCACTTGA	188	8	+	Petroselinum crispum	part of a light responsive element
PITA_02042	TCCC-motif	TCTCCCT	908	7	-	Spinacia oleracea	part of a light responsive element
PITA_02042	O2-site	GATGATGTGG	829	9	-	Zea mays	cis-acting regulatory element involved in zein metabolism regulation
PITA_02042	ATC-motif	TGCTATCCA	58	9	+	Pisum sativum	part of a conserved DNA module involved in light responsiveness
PITA_02042	MRE	AACCTAA	1481	7	+	Petroselinum crispum	MYB binding site involved in light responsiveness
PITA_02042	P-box	CCTTTTG	45	7	-	Oryza sativa	gibberellin-responsive element
PITA_02042	P-box	CCTTTTG	473	7	+	Oryza sativa	gibberellin-responsive element
PITA_02042	P-box	CCTTTTG	1321	7	-	Oryza sativa	gibberellin-responsive element
PITA_02042	CGTCA-motif	CGTCA	659	5	+	Hordeum vulgare	cis-acting regulatory element involved in the MeJA-responsiveness
PITA_02042	TGACG-motif	TGACG	659	5	-	Hordeum vulgare	cis-acting regulatory element involved in the MeJA-responsiveness
PITA_02225	3-AF3 binding site	CACTATCTAAC	1478	10	+	Pisum sativum	part of a conserved DNA module array (CMA3)
PITA_02225	Box 4	ATTAAT	715	6	+	Petroselinum crispum	part of a conserved DNA module involved in light responsiveness
PITA_02225	P-box	CCTTTTG	254	7	+	Oryza sativa	gibberellin-responsive element
PITA_02225	P-box	CCTTTTG	1956	7	+	Oryza sativa	gibberellin-responsive element
PITA_02225	circadian	CAAAGATATC	1014	9	+	Lycopersicon esculentum	cis-acting regulatory element involved in circadian control
PITA_02225	circadian	CAAAGATATC	1018	9	-	Lycopersicon esculentum	cis-acting regulatory element involved in circadian control
PITA_02225	GATA-motif	AAGATAAGATT	121	10	+	Arabidopsis thaliana	part of a light responsive element
PITA_02225	GATA-motif	AAGGATAAGG	248	9	-	Solanum tuberosum	part of a light responsive element
PITA_02225	GATA-motif	GATAGGG	887	7	+	Pisum sativum	part of a light responsive element
PITA_02225	ARE	AAACCA	779	6	+	Zea mays	cis-acting regulatory element essential for the anaerobic induction
PITA_02225	ARE	AAACCA	1037	6	-	Zea mays	cis-acting regulatory element essential for the anaerobic induction
PITA_02225	TGA-element	AACGAC	1839	6	+	Brassica oleracea	auxin-responsive element
PITA_02539	circadian	CAAAGATATC	682	9	-	Lycopersicon esculentum	cis-acting regulatory element involved in circadian control
PITA_02539	ARE	AAACCA	757	6	+	Zea mays	cis-acting regulatory element essential for the anaerobic induction
PITA_02539	ARE	AAACCA	767	6	-	Zea mays	cis-acting regulatory element essential for the anaerobic induction
PITA_02539	ARE	AAACCA	1090	6	-	Zea mays	cis-acting regulatory element essential for the anaerobic induction
PITA_02539	ARE	AAACCA	1276	6	+	Zea mays	cis-acting regulatory element essential for the anaerobic induction
PITA_02539	GT1-motif	GGTTAAT	612	7	-	Avena sativa	light responsive element
PITA_02539	GT1-motif	GGTTAA	613	6	-	Arabidopsis thaliana	light responsive element
PITA_02539	TATC-box	TATCCCA	1001	7	+	Oryza sativa	cis-acting element involved in gibberellin-responsiveness
PITA_02539	TC-rich repeats	GTTTTCTTAC	704	9	+	Nicotiana tabacum	cis-acting element involved in defense and stress responsiveness
PITA_02539	TCT-motif	TCTTAC	1699	6	-	Arabidopsis thaliana	part of a light responsive element
PITA_02539	Box 4	ATTAAT	38	6	+	Petroselinum crispum	part of a conserved DNA module involved in light responsiveness
PITA_02539	Box 4	ATTAAT	191	6	+	Petroselinum crispum	part of a conserved DNA module involved in light responsiveness
PITA_02539	Box 4	ATTAAT	214	6	+	Petroselinum crispum	part of a conserved DNA module involved in light responsiveness
PITA_02539	Box 4	ATTAAT	317	6	+	Petroselinum crispum	part of a conserved DNA module involved in light responsiveness
PITA_02539	Box 4	ATTAAT	601	6	+	Petroselinum crispum	part of a conserved DNA module involved in light responsiveness
PITA_02539	Box 4	ATTAAT	960	6	+	Petroselinum crispum	part of a conserved DNA module involved in light responsiveness
PITA_02539	Box 4	ATTAAT	1345	6	-	Petroselinum crispum	part of a conserved DNA module involved in light responsiveness
PITA_02539	Box 4	ATTAAT	1459	6	-	Petroselinum crispum	part of a conserved DNA module involved in light responsiveness
PITA_02539	P-box	CCTTTTG	237	7	+	Oryza sativa	gibberellin-responsive element
PITA_02539	CGTCA-motif	CGTCA	1894	5	+	Hordeum vulgare	cis-acting regulatory element involved in the MeJA-responsiveness
PITA_02539	TGACG-motif	TGACG	1894	5	-	Hordeum vulgare	cis-acting regulatory element involved in the MeJA-responsiveness
PITA_02539	AT1-motif	AATTATTTTTTATT	1365	13	+	Solanum tuberosum	part of a light responsive module
PITA_02539	AuxRE	TGTCTCAATAAG	1708	11	+	Glycine max	part of an auxin-responsive element
PITA_02539	LAMP-element	CTTTATCA	108	8	+	Pisum sativum	part of a light responsive element
PITA_02539	LAMP-element	CTTTATCA	672	8	+	Pisum sativum	part of a light responsive element
PITA_02539	LAMP-element	CTTTATCA	1536	8	+	Pisum sativum	part of a light responsive element
PITA_02539	AE-box	AGAAACTT	1531	8	+	Arabidopsis thaliana	part of a module for light response
PITA_02539	TCCC-motif	TCTCCCT	1043	7	+	Spinacia oleracea	part of a light responsive element
PITA_02556	Box 4	ATTAAT	124	6	+	Petroselinum crispum	part of a conserved DNA module involved in light responsiveness
PITA_02556	Box 4	ATTAAT	743	6	+	Petroselinum crispum	part of a conserved DNA module involved in light responsiveness
PITA_02556	TCT-motif	TCTTAC	1314	6	-	Arabidopsis thaliana	part of a light responsive element
PITA_02556	G-Box	CACGTT	1359	6	-	Pisum sativum	cis-acting regulatory element involved in light responsiveness
PITA_02556	G-Box	CACGTT	1768	6	+	Pisum sativum	cis-acting regulatory element involved in light responsiveness
PITA_02556	CAT-box	GCCACT	1555	6	-	Arabidopsis thaliana	cis-acting regulatory element related to meristem expression
PITA_02556	MBS	CAACTG	1627	6	-	Arabidopsis thaliana	MYB binding site involved in drought-inducibility
PITA_02556	GT1-motif	GGTTAA	1061	6	-	Arabidopsis thaliana	light responsive element
PITA_02556	circadian	CAAAGATATC	568	9	-	Lycopersicon esculentum	cis-acting regulatory element involved in circadian control
PITA_02556	I-box	gGATAAGGTG	986	9	-	Zea mays	part of a light responsive element
PITA_02556	O2-site	GATGATGTGG	76	9	-	Zea mays	cis-acting regulatory element involved in zein metabolism regulation
PITA_02556	O2-site	GATGATGTGG	100	9	+	Zea mays	cis-acting regulatory element involved in zein metabolism regulation
PITA_02556	O2-site	GATGACATGG	1812	10	-	Zea mays	cis-acting regulatory element involved in zein metabolism regulation
PITA_02556	LAMP-element	CCTTATCCA	1429	9	-	Spinacia oleracea	part of a light responsive element
PITA_02556	CGTCA-motif	CGTCA	1118	5	-	Hordeum vulgare	cis-acting regulatory element involved in the MeJA-responsiveness
PITA_02556	CGTCA-motif	CGTCA	1146	5	-	Hordeum vulgare	cis-acting regulatory element involved in the MeJA-responsiveness
PITA_02556	CGTCA-motif	CGTCA	1244	5	-	Hordeum vulgare	cis-acting regulatory element involved in the MeJA-responsiveness
PITA_02556	TGACG-motif	TGACG	1118	5	+	Hordeum vulgare	cis-acting regulatory element involved in the MeJA-responsiveness
PITA_02556	TGACG-motif	TGACG	1146	5	+	Hordeum vulgare	cis-acting regulatory element involved in the MeJA-responsiveness
PITA_02556	TGACG-motif	TGACG	1244	5	+	Hordeum vulgare	cis-acting regulatory element involved in the MeJA-responsiveness
PITA_02556	chs-CMA1a	TTACTTAA	1371	8	+	Daucus carota	part of a light responsive element
PITA_02556	chs-CMA1a	TTACTTAA	1918	8	-	Daucus carota	part of a light responsive element
PITA_02556	ABRE	ACGTG	1360	5	+	Arabidopsis thaliana	cis-acting element involved in the abscisic acid responsiveness
PITA_02556	ABRE	ACGTG	1768	5	-	Arabidopsis thaliana	cis-acting element involved in the abscisic acid responsiveness
PITA_02581	TATC-box	TATCCCA	1765	7	+	Oryza sativa	cis-acting element involved in gibberellin-responsiveness
PITA_02581	GT1-motif	GGTTAAT	1056	7	-	Avena sativa	light responsive element
PITA_02581	GT1-motif	GGTTAA	1057	6	-	Arabidopsis thaliana	light responsive element
PITA_02581	GT1-motif	GGTTAA	1211	6	-	Arabidopsis thaliana	light responsive element
PITA_02581	GATA-motif	GATAGGA	1112	7	-	Arabidopsis thaliana	part of a light responsive element
PITA_02581	AuxRE	TGTCTCAATAAG	997	11	+	Glycine max	part of an auxin-responsive element
PITA_02581	TCA-element	TCAGAAGAGG	236	9	+	Brassica oleracea	cis-acting element involved in salicylic acid responsiveness
PITA_02581	TGA-element	AACGAC	84	6	+	Brassica oleracea	auxin-responsive element
PITA_02581	ABRE	ACGTG	815	5	-	Arabidopsis thaliana	cis-acting element involved in the abscisic acid responsiveness
PITA_02581	ATCT-motif	AATCTAATCC	638	9	+	Pisum sativum	part of a conserved DNA module involved in light responsiveness
PITA_02581	MRE	AACCTAA	492	7	-	Petroselinum crispum	MYB binding site involved in light responsiveness
PITA_02581	MRE	AACCTAA	506	7	-	Petroselinum crispum	MYB binding site involved in light responsiveness
PITA_02581	G-Box	CACGTT	815	6	+	Pisum sativum	cis-acting regulatory element involved in light responsiveness
PITA_02581	MBS	CAACTG	215	6	+	Arabidopsis thaliana	MYB binding site involved in drought-inducibility
PITA_02581	MBS	CAACTG	228	6	-	Arabidopsis thaliana	MYB binding site involved in drought-inducibility
PITA_02581	MBS	CAACTG	774	6	-	Arabidopsis thaliana	MYB binding site involved in drought-inducibility
PITA_02581	MBS	CAACTG	953	6	-	Arabidopsis thaliana	MYB binding site involved in drought-inducibility
PITA_02581	MBS	CAACTG	1411	6	+	Arabidopsis thaliana	MYB binding site involved in drought-inducibility
PITA_02581	Box 4	ATTAAT	296	6	+	Petroselinum crispum	part of a conserved DNA module involved in light responsiveness
PITA_02581	Box 4	ATTAAT	1394	6	-	Petroselinum crispum	part of a conserved DNA module involved in light responsiveness
PITA_02581	Box II	ACACGTTGT	814	9	+	Sinapis alba	part of a light responsive element
PITA_02581	A-box	CCGTCC	1563	6	+	Petroselinum crispum	cis-acting regulatory element
PITA_02761	CCAAT-box	CAACGG	1536	6	-	Hordeum vulgare	MYBHv1 binding site
PITA_02761	G-box	CACGAC	1758	6	+	Zea mays	cis-acting regulatory element involved in light responsiveness
PITA_02761	G-box	TACGTG	1995	6	-	Arabidopsis thaliana	cis-acting regulatory element involved in light responsiveness
PITA_02761	Box 4	ATTAAT	261	6	+	Petroselinum crispum	part of a conserved DNA module involved in light responsiveness
PITA_02761	Box 4	ATTAAT	833	6	+	Petroselinum crispum	part of a conserved DNA module involved in light responsiveness
PITA_02761	Box 4	ATTAAT	1015	6	-	Petroselinum crispum	part of a conserved DNA module involved in light responsiveness
PITA_02761	Box 4	ATTAAT	1038	6	-	Petroselinum crispum	part of a conserved DNA module involved in light responsiveness
PITA_02761	Box 4	ATTAAT	1224	6	-	Petroselinum crispum	part of a conserved DNA module involved in light responsiveness
PITA_02761	Box 4	ATTAAT	1232	6	-	Petroselinum crispum	part of a conserved DNA module involved in light responsiveness
PITA_02761	GATA-motif	GATAGGA	461	7	+	Arabidopsis thaliana	part of a light responsive element
PITA_02761	GATA-motif	AAGATAAGATT	1152	10	-	Arabidopsis thaliana	part of a light responsive element
PITA_02761	GATA-motif	AAGGATAAGG	1629	9	+	Solanum tuberosum	part of a light responsive element
PITA_02761	LTR	CCGAAA	1926	6	+	Hordeum vulgare	cis-acting element involved in low-temperature responsiveness
PITA_02761	TCA-element	CCATCTTTTT	1501	9	+	Nicotiana tabacum	cis-acting element involved in salicylic acid responsiveness
PITA_02761	GT1-motif	GGTTAA	709	6	-	Arabidopsis thaliana	light responsive element
PITA_02761	GT1-motif	GGTTAA	1266	6	-	Arabidopsis thaliana	light responsive element
PITA_02761	MSA-like	(T/C)C(T/C)AACGG(T/C)(T/C)A	1614	8.5	-	Catharanthus roseus	cis-acting element involved in cell cycle regulation
PITA_02761	CGTCA-motif	CGTCA	1516	5	-	Hordeum vulgare	cis-acting regulatory element involved in the MeJA-responsiveness
PITA_02761	CGTCA-motif	CGTCA	1802	5	+	Hordeum vulgare	cis-acting regulatory element involved in the MeJA-responsiveness
PITA_02761	CGTCA-motif	CGTCA	1871	5	+	Hordeum vulgare	cis-acting regulatory element involved in the MeJA-responsiveness
PITA_02761	ABRE	ACGTG	1995	5	-	Arabidopsis thaliana	cis-acting element involved in the abscisic acid responsiveness
PITA_02761	TGACG-motif	TGACG	1516	5	+	Hordeum vulgare	cis-acting regulatory element involved in the MeJA-responsiveness
PITA_02761	TGACG-motif	TGACG	1802	5	-	Hordeum vulgare	cis-acting regulatory element involved in the MeJA-responsiveness
PITA_02761	TGACG-motif	TGACG	1871	5	-	Hordeum vulgare	cis-acting regulatory element involved in the MeJA-responsiveness
PITA_02761	Gap-box	CAAATGAA(A/G)A	1573	9	+	Arabidopsis thaliana	part of a light responsive element
PITA_02889	AuxRE	TGTCTCAATAAG	997	11	+	Glycine max	part of an auxin-responsive element
PITA_02889	TCA-element	TCAGAAGAGG	237	9	+	Brassica oleracea	cis-acting element involved in salicylic acid responsiveness
PITA_02889	GATA-motif	GATAGGA	1112	7	-	Arabidopsis thaliana	part of a light responsive element
PITA_02889	GT1-motif	GGTTAAT	1056	7	-	Avena sativa	light responsive element
PITA_02889	GT1-motif	GGTTAA	1057	6	-	Arabidopsis thaliana	light responsive element
PITA_02889	GT1-motif	GGTTAA	1211	6	-	Arabidopsis thaliana	light responsive element
PITA_02889	TATC-box	TATCCCA	1765	7	+	Oryza sativa	cis-acting element involved in gibberellin-responsiveness
PITA_02889	MBS	CAACTG	216	6	+	Arabidopsis thaliana	MYB binding site involved in drought-inducibility
PITA_02889	MBS	CAACTG	229	6	-	Arabidopsis thaliana	MYB binding site involved in drought-inducibility
PITA_02889	MBS	CAACTG	774	6	-	Arabidopsis thaliana	MYB binding site involved in drought-inducibility
PITA_02889	MBS	CAACTG	953	6	-	Arabidopsis thaliana	MYB binding site involved in drought-inducibility
PITA_02889	MBS	CAACTG	1411	6	+	Arabidopsis thaliana	MYB binding site involved in drought-inducibility
PITA_02889	G-Box	CACGTT	815	6	+	Pisum sativum	cis-acting regulatory element involved in light responsiveness
PITA_02889	MRE	AACCTAA	492	7	-	Petroselinum crispum	MYB binding site involved in light responsiveness
PITA_02889	MRE	AACCTAA	506	7	-	Petroselinum crispum	MYB binding site involved in light responsiveness
PITA_02889	ATCT-motif	AATCTAATCC	638	9	+	Pisum sativum	part of a conserved DNA module involved in light responsiveness
PITA_02889	ABRE	ACGTG	815	5	-	Arabidopsis thaliana	cis-acting element involved in the abscisic acid responsiveness
PITA_02889	TGA-element	AACGAC	85	6	+	Brassica oleracea	auxin-responsive element
PITA_02889	CCAAT-box	CAACGG	1940	6	-	Hordeum vulgare	MYBHv1 binding site
PITA_02889	Box 4	ATTAAT	297	6	+	Petroselinum crispum	part of a conserved DNA module involved in light responsiveness
PITA_02889	Box 4	ATTAAT	1394	6	-	Petroselinum crispum	part of a conserved DNA module involved in light responsiveness
PITA_02889	A-box	CCGTCC	1563	6	+	Petroselinum crispum	cis-acting regulatory element
PITA_02889	Box II	ACACGTTGT	814	9	+	Sinapis alba	part of a light responsive element
PITA_03224	MRE	AACCTAA	1229	7	+	Petroselinum crispum	MYB binding site involved in light responsiveness
PITA_03224	ARE	AAACCA	1294	6	+	Zea mays	cis-acting regulatory element essential for the anaerobic induction
PITA_03224	ARE	AAACCA	1407	6	+	Zea mays	cis-acting regulatory element essential for the anaerobic induction
PITA_03224	ABRE	ACGTG	1457	5	+	Arabidopsis thaliana	cis-acting element involved in the abscisic acid responsiveness
PITA_03224	ABRE	ACGTG	1624	5	+	Arabidopsis thaliana	cis-acting element involved in the abscisic acid responsiveness
PITA_03224	ABRE	ACGTG	1722	5	+	Arabidopsis thaliana	cis-acting element involved in the abscisic acid responsiveness
PITA_03224	Box 4	ATTAAT	79	6	+	Petroselinum crispum	part of a conserved DNA module involved in light responsiveness
PITA_03224	Box 4	ATTAAT	354	6	+	Petroselinum crispum	part of a conserved DNA module involved in light responsiveness
PITA_03224	Box 4	ATTAAT	909	6	+	Petroselinum crispum	part of a conserved DNA module involved in light responsiveness
PITA_03224	G-box	TAACACGTAG	416	9	-	Brassica oleracea	cis-acting regulatory element involved in light responsiveness
PITA_03224	G-Box	CACGTT	1456	6	-	Pisum sativum	cis-acting regulatory element involved in light responsiveness
PITA_03224	G-Box	CACGTT	1623	6	-	Pisum sativum	cis-acting regulatory element involved in light responsiveness
PITA_03224	G-Box	CACGTT	1721	6	-	Pisum sativum	cis-acting regulatory element involved in light responsiveness
PITA_03224	GARE-motif	TCTGTTG	1014	7	+	Brassica oleracea	gibberellin-responsive element
PITA_03623	CGTCA-motif	CGTCA	306	5	-	Hordeum vulgare	cis-acting regulatory element involved in the MeJA-responsiveness
PITA_03623	CGTCA-motif	CGTCA	380	5	-	Hordeum vulgare	cis-acting regulatory element involved in the MeJA-responsiveness
PITA_03623	CGTCA-motif	CGTCA	1332	5	-	Hordeum vulgare	cis-acting regulatory element involved in the MeJA-responsiveness
PITA_03623	TGACG-motif	TGACG	306	5	+	Hordeum vulgare	cis-acting regulatory element involved in the MeJA-responsiveness
PITA_03623	TGACG-motif	TGACG	380	5	+	Hordeum vulgare	cis-acting regulatory element involved in the MeJA-responsiveness
PITA_03623	TGACG-motif	TGACG	1332	5	+	Hordeum vulgare	cis-acting regulatory element involved in the MeJA-responsiveness
PITA_03623	MRE	AACCTAA	1975	7	+	Petroselinum crispum	MYB binding site involved in light responsiveness
PITA_03623	AE-box	AGAAACTT	1323	8	-	Arabidopsis thaliana	part of a module for light response
PITA_03623	O2-site	GATGA(C/T)(A/G)TG(A/G)	1603	8	+	Zea mays	cis-acting regulatory element involved in zein metabolism regulation
PITA_03623	Sp1	GGGCGG	1646	6	+	Oryza sativa	light responsive element
PITA_03623	Sp1	GGGCGG	1764	6	+	Oryza sativa	light responsive element
PITA_03623	LTR	CCGAAA	1576	6	-	Hordeum vulgare	cis-acting element involved in low-temperature responsiveness
PITA_03623	ARE	AAACCA	1407	6	-	Zea mays	cis-acting regulatory element essential for the anaerobic induction
PITA_03623	ARE	AAACCA	1728	6	-	Zea mays	cis-acting regulatory element essential for the anaerobic induction
PITA_03623	GT1-motif	GGTTAAT	1003	7	+	Avena sativa	light responsive element
PITA_03623	CCAAT-box	CAACGG	762	6	+	Hordeum vulgare	MYBHv1 binding site
PITA_03623	CAT-box	GCCACT	1198	6	-	Arabidopsis thaliana	cis-acting regulatory element related to meristem expression
PITA_03623	Box 4	ATTAAT	898	6	+	Petroselinum crispum	part of a conserved DNA module involved in light responsiveness
PITA_03623	Box 4	ATTAAT	947	6	+	Petroselinum crispum	part of a conserved DNA module involved in light responsiveness
PITA_03623	Box 4	ATTAAT	980	6	+	Petroselinum crispum	part of a conserved DNA module involved in light responsiveness
PITA_03623	Box 4	ATTAAT	1013	6	-	Petroselinum crispum	part of a conserved DNA module involved in light responsiveness
PITA_03623	Box 4	ATTAAT	1019	6	-	Petroselinum crispum	part of a conserved DNA module involved in light responsiveness
PITA_03695	ABRE	ACGTG	673	5	-	Arabidopsis thaliana	cis-acting element involved in the abscisic acid responsiveness
PITA_03695	TGACG-motif	TGACG	479	5	+	Hordeum vulgare	cis-acting regulatory element involved in the MeJA-responsiveness
PITA_03695	CGTCA-motif	CGTCA	479	5	-	Hordeum vulgare	cis-acting regulatory element involved in the MeJA-responsiveness
PITA_03695	P-box	CCTTTTG	167	7	-	Oryza sativa	gibberellin-responsive element
PITA_03695	P-box	CCTTTTG	750	7	-	Oryza sativa	gibberellin-responsive element
PITA_03695	P-box	CCTTTTG	1996	7	+	Oryza sativa	gibberellin-responsive element
PITA_03695	AT-rich sequence	TAAAATACT	1122	9	+	Pisum sativum	element for maximal elicitor-mediated activation (2copies)
PITA_03695	O2-site	GATGATGTGG	1908	9	+	Zea mays	cis-acting regulatory element involved in zein metabolism regulation
PITA_03695	GT1-motif	GGTTAA	350	6	+	Arabidopsis thaliana	light responsive element
PITA_03695	GT1-motif	GGTTAA	914	6	+	Arabidopsis thaliana	light responsive element
PITA_03695	ARE	AAACCA	216	6	-	Zea mays	cis-acting regulatory element essential for the anaerobic induction
PITA_03695	ARE	AAACCA	379	6	-	Zea mays	cis-acting regulatory element essential for the anaerobic induction
PITA_03695	ARE	AAACCA	799	6	-	Zea mays	cis-acting regulatory element essential for the anaerobic induction
PITA_03695	ARE	AAACCA	943	6	-	Zea mays	cis-acting regulatory element essential for the anaerobic induction
PITA_03695	ARE	AAACCA	1170	6	+	Zea mays	cis-acting regulatory element essential for the anaerobic induction
PITA_03695	ARE	AAACCA	1284	6	+	Zea mays	cis-acting regulatory element essential for the anaerobic induction
PITA_03695	ARE	AAACCA	1363	6	+	Zea mays	cis-acting regulatory element essential for the anaerobic induction
PITA_03695	ARE	AAACCA	1459	6	+	Zea mays	cis-acting regulatory element essential for the anaerobic induction
PITA_03695	ARE	AAACCA	1537	6	+	Zea mays	cis-acting regulatory element essential for the anaerobic induction
PITA_03695	ARE	AAACCA	1667	6	-	Zea mays	cis-acting regulatory element essential for the anaerobic induction
PITA_03695	ARE	AAACCA	1700	6	+	Zea mays	cis-acting regulatory element essential for the anaerobic induction
PITA_03695	AuxRR-core	GGTCCAT	1227	7	-	Nicotiana tabacum	cis-acting regulatory element involved in auxin responsiveness
PITA_03695	LTR	CCGAAA	1059	6	+	Hordeum vulgare	cis-acting element involved in low-temperature responsiveness
PITA_03695	G-Box	CACGTT	673	6	+	Pisum sativum	cis-acting regulatory element involved in light responsiveness
PITA_03695	G-box	TAAACGTG	673	8	-	Brassica oleracea	cis-acting regulatory element involved in light responsiveness
PITA_03695	G-box	CACGAC	1624	6	-	Zea mays	cis-acting regulatory element involved in light responsiveness
PITA_03695	G-box	CACGAC	1663	6	-	Zea mays	cis-acting regulatory element involved in light responsiveness
PITA_03695	Box 4	ATTAAT	1105	6	-	Petroselinum crispum	part of a conserved DNA module involved in light responsiveness
PITA_03695	Box 4	ATTAAT	1677	6	-	Petroselinum crispum	part of a conserved DNA module involved in light responsiveness
PITA_03709	TCA-element	CCATCTTTTT	1603	9	-	Nicotiana tabacum	cis-acting element involved in salicylic acid responsiveness
PITA_03709	MBS	CAACTG	107	6	-	Arabidopsis thaliana	MYB binding site involved in drought-inducibility
PITA_03709	MBS	CAACTG	713	6	-	Arabidopsis thaliana	MYB binding site involved in drought-inducibility
PITA_03709	GT1-motif	GGTTAA	1269	6	+	Arabidopsis thaliana	light responsive element
PITA_03709	GT1-motif	GGTTAA	1898	6	-	Arabidopsis thaliana	light responsive element
PITA_03709	G-Box	CACGTT	752	6	+	Pisum sativum	cis-acting regulatory element involved in light responsiveness
PITA_03709	G-box	CACGAC	393	6	+	Zea mays	cis-acting regulatory element involved in light responsiveness
PITA_03709	G-box	TACGTG	630	6	-	Arabidopsis thaliana	cis-acting regulatory element involved in light responsiveness
PITA_03709	TCT-motif	TCTTAC	781	6	-	Arabidopsis thaliana	part of a light responsive element
PITA_03709	MRE	AACCTAA	1266	7	-	Petroselinum crispum	MYB binding site involved in light responsiveness
PITA_03709	ABRE	ACGTG	630	5	-	Arabidopsis thaliana	cis-acting element involved in the abscisic acid responsiveness
PITA_03709	ABRE	ACGTG	752	5	-	Arabidopsis thaliana	cis-acting element involved in the abscisic acid responsiveness
PITA_03709	ABRE	AACCCGG	771	7	+	Arabidopsis thaliana	cis-acting element involved in the abscisic acid responsiveness
PITA_03709	TGACG-motif	TGACG	190	5	+	Hordeum vulgare	cis-acting regulatory element involved in the MeJA-responsiveness
PITA_03709	TGACG-motif	TGACG	437	5	-	Hordeum vulgare	cis-acting regulatory element involved in the MeJA-responsiveness
PITA_03709	TGACG-motif	TGACG	506	5	-	Hordeum vulgare	cis-acting regulatory element involved in the MeJA-responsiveness
PITA_03709	TGACG-motif	TGACG	878	5	+	Hordeum vulgare	cis-acting regulatory element involved in the MeJA-responsiveness
PITA_03709	CGTCA-motif	CGTCA	190	5	-	Hordeum vulgare	cis-acting regulatory element involved in the MeJA-responsiveness
PITA_03709	CGTCA-motif	CGTCA	437	5	+	Hordeum vulgare	cis-acting regulatory element involved in the MeJA-responsiveness
PITA_03709	CGTCA-motif	CGTCA	506	5	+	Hordeum vulgare	cis-acting regulatory element involved in the MeJA-responsiveness
PITA_03709	CGTCA-motif	CGTCA	878	5	-	Hordeum vulgare	cis-acting regulatory element involved in the MeJA-responsiveness
PITA_03709	P-box	CCTTTTG	305	7	-	Oryza sativa	gibberellin-responsive element
PITA_04364	A-box	CCGTCC	353	6	-	Petroselinum crispum	cis-acting regulatory element
PITA_04364	A-box	CCGTCC	1388	6	+	Petroselinum crispum	cis-acting regulatory element
PITA_04364	TGA-element	AACGAC	1060	6	-	Brassica oleracea	auxin-responsive element
PITA_04364	TGA-element	AACGAC	1289	6	-	Brassica oleracea	auxin-responsive element
PITA_04364	GA-motif	ATAGATAA	1189	8	+	Arabidopsis thaliana	part of a light responsive element
PITA_04364	AE-box	AGAAACAA	1445	8	+	Arabidopsis thaliana	part of a module for light response
PITA_04364	CGTCA-motif	CGTCA	505	5	+	Hordeum vulgare	cis-acting regulatory element involved in the MeJA-responsiveness
PITA_04364	CGTCA-motif	CGTCA	1253	5	+	Hordeum vulgare	cis-acting regulatory element involved in the MeJA-responsiveness
PITA_04364	CGTCA-motif	CGTCA	1430	5	+	Hordeum vulgare	cis-acting regulatory element involved in the MeJA-responsiveness
PITA_04364	CGTCA-motif	CGTCA	1872	5	-	Hordeum vulgare	cis-acting regulatory element involved in the MeJA-responsiveness
PITA_04364	CGTCA-motif	CGTCA	1968	5	+	Hordeum vulgare	cis-acting regulatory element involved in the MeJA-responsiveness
PITA_04364	TGACG-motif	TGACG	505	5	-	Hordeum vulgare	cis-acting regulatory element involved in the MeJA-responsiveness
PITA_04364	TGACG-motif	TGACG	1253	5	-	Hordeum vulgare	cis-acting regulatory element involved in the MeJA-responsiveness
PITA_04364	TGACG-motif	TGACG	1430	5	-	Hordeum vulgare	cis-acting regulatory element involved in the MeJA-responsiveness
PITA_04364	TGACG-motif	TGACG	1872	5	+	Hordeum vulgare	cis-acting regulatory element involved in the MeJA-responsiveness
PITA_04364	TGACG-motif	TGACG	1968	5	-	Hordeum vulgare	cis-acting regulatory element involved in the MeJA-responsiveness
PITA_04364	ABRE	ACGTG	503	5	-	Arabidopsis thaliana	cis-acting element involved in the abscisic acid responsiveness
PITA_04364	ABRE	AACCCGG	1357	7	+	Arabidopsis thaliana	cis-acting element involved in the abscisic acid responsiveness
PITA_04364	AT-rich element	ATAGAAATCAA	115	10	+	Glycine max	binding site of AT-rich DNA binding protein (ATBP-1)
PITA_04364	Box 4	ATTAAT	1165	6	-	Petroselinum crispum	part of a conserved DNA module involved in light responsiveness
PITA_04364	TCT-motif	TCTTAC	524	6	+	Arabidopsis thaliana	part of a light responsive element
PITA_04364	TCT-motif	TCTTAC	977	6	-	Arabidopsis thaliana	part of a light responsive element
PITA_04364	G-box	CACGTC	503	6	+	Zea mays	cis-acting regulatory element involved in light responsiveness
PITA_04364	G-box	CACGAC	2013	6	+	Zea mays	cis-acting regulatory element involved in light responsiveness
PITA_04364	GCN4_motif	TGAGTCA	1984	7	+	Oryza sativa	cis-regulatory element involved in endosperm expression
PITA_04364	TC-rich repeats	ATTCTCTAAC	324	9	-	Nicotiana tabacum	cis-acting element involved in defense and stress responsiveness
PITA_04364	TC-rich repeats	GTTTTCTTAC	977	9	-	Nicotiana tabacum	cis-acting element involved in defense and stress responsiveness
PITA_04364	CAT-box	GCCACT	1022	6	+	Arabidopsis thaliana	cis-acting regulatory element related to meristem expression
PITA_04364	ARE	AAACCA	42	6	+	Zea mays	cis-acting regulatory element essential for the anaerobic induction
PITA_04364	ARE	AAACCA	52	6	+	Zea mays	cis-acting regulatory element essential for the anaerobic induction
PITA_04364	ARE	AAACCA	119	6	+	Zea mays	cis-acting regulatory element essential for the anaerobic induction
PITA_04364	ARE	AAACCA	167	6	+	Zea mays	cis-acting regulatory element essential for the anaerobic induction
PITA_04364	ARE	AAACCA	172	6	+	Zea mays	cis-acting regulatory element essential for the anaerobic induction
PITA_04364	ARE	AAACCA	982	6	+	Zea mays	cis-acting regulatory element essential for the anaerobic induction
PITA_04364	ARE	AAACCA	1337	6	+	Zea mays	cis-acting regulatory element essential for the anaerobic induction
PITA_04364	ARE	AAACCA	1453	6	+	Zea mays	cis-acting regulatory element essential for the anaerobic induction
PITA_04364	MBS	CAACTG	1792	6	-	Arabidopsis thaliana	MYB binding site involved in drought-inducibility
PITA_04364	TCA-element	CCATCTTTTT	961	9	-	Nicotiana tabacum	cis-acting element involved in salicylic acid responsiveness
PITA_04364	LTR	CCGAAA	1758	6	+	Hordeum vulgare	cis-acting element involved in low-temperature responsiveness
PITA_04644	TATC-box	TATCCCA	1256	7	+	Oryza sativa	cis-acting element involved in gibberellin-responsiveness
PITA_04644	G-Box	CACGTT	1523	6	-	Pisum sativum	cis-acting regulatory element involved in light responsiveness
PITA_04644	Box 4	ATTAAT	386	6	+	Petroselinum crispum	part of a conserved DNA module involved in light responsiveness
PITA_04644	TCT-motif	TCTTAC	559	6	-	Arabidopsis thaliana	part of a light responsive element
PITA_04644	G-box	CACGAC	1558	6	-	Zea mays	cis-acting regulatory element involved in light responsiveness
PITA_04644	Sp1	GGGCGG	1614	6	-	Oryza sativa	light responsive element
PITA_04644	ARE	AAACCA	536	6	+	Zea mays	cis-acting regulatory element essential for the anaerobic induction
PITA_04644	ARE	AAACCA	1114	6	+	Zea mays	cis-acting regulatory element essential for the anaerobic induction
PITA_04644	ARE	AAACCA	1160	6	+	Zea mays	cis-acting regulatory element essential for the anaerobic induction
PITA_04644	ARE	AAACCA	1212	6	+	Zea mays	cis-acting regulatory element essential for the anaerobic induction
PITA_04644	ARE	AAACCA	1337	6	+	Zea mays	cis-acting regulatory element essential for the anaerobic induction
PITA_04644	ARE	AAACCA	1533	6	+	Zea mays	cis-acting regulatory element essential for the anaerobic induction
PITA_04644	ARE	AAACCA	1887	6	-	Zea mays	cis-acting regulatory element essential for the anaerobic induction
PITA_04644	MBS	CAACTG	1763	6	-	Arabidopsis thaliana	MYB binding site involved in drought-inducibility
PITA_04644	I-box	AAGATAAGGCT	839	10	+	Gossypium hirsutum	part of a light responsive element
PITA_04644	I-box	AGATAAGG	840	8	+	Triticum aestivum	part of a light responsive element
PITA_04644	I-box	TGATAATGT	1323	9	-	Solanum tuberosum	part of a light responsive element
PITA_04644	ABRE	ACGTG	1524	5	+	Arabidopsis thaliana	cis-acting element involved in the abscisic acid responsiveness
PITA_04780	CCAAT-box	CAACGG	171	6	+	Hordeum vulgare	MYBHv1 binding site
PITA_04780	Box 4	ATTAAT	747	6	+	Petroselinum crispum	part of a conserved DNA module involved in light responsiveness
PITA_04780	G-box	TACGTG	338	6	+	Arabidopsis thaliana	cis-acting regulatory element involved in light responsiveness
PITA_04780	G-box	CAGACGTGGCA	1328	10	-	Nicotiana plumbaginifolia	cis-acting regulatory element involved in light responsiveness
PITA_04780	G-Box	CACGTT	255	6	+	Pisum sativum	cis-acting regulatory element involved in light responsiveness
PITA_04780	G-Box	CACGTT	900	6	-	Pisum sativum	cis-acting regulatory element involved in light responsiveness
PITA_04780	GCN4_motif	TGAGTCA	1935	7	+	Oryza sativa	cis-regulatory element involved in endosperm expression
PITA_04780	TCA-element	CCATCTTTTT	1681	9	+	Nicotiana tabacum	cis-acting element involved in salicylic acid responsiveness
PITA_04780	ARE	AAACCA	610	6	+	Zea mays	cis-acting regulatory element essential for the anaerobic induction
PITA_04780	ARE	AAACCA	635	6	+	Zea mays	cis-acting regulatory element essential for the anaerobic induction
PITA_04780	I-box	AGATAAGG	1412	8	+	Triticum aestivum	part of a light responsive element
PITA_04780	TCCC-motif	TCTCCCT	151	7	-	Spinacia oleracea	part of a light responsive element
PITA_04780	WUN-motif	AAATTTCCT	1766	9	-	Brassica oleracea	wound-responsive element
PITA_04780	CGTCA-motif	CGTCA	1371	5	-	Hordeum vulgare	cis-acting regulatory element involved in the MeJA-responsiveness
PITA_04780	CGTCA-motif	CGTCA	1518	5	+	Hordeum vulgare	cis-acting regulatory element involved in the MeJA-responsiveness
PITA_04780	CGTCA-motif	CGTCA	1588	5	-	Hordeum vulgare	cis-acting regulatory element involved in the MeJA-responsiveness
PITA_04780	CGTCA-motif	CGTCA	1735	5	-	Hordeum vulgare	cis-acting regulatory element involved in the MeJA-responsiveness
PITA_04780	TGACG-motif	TGACG	1371	5	+	Hordeum vulgare	cis-acting regulatory element involved in the MeJA-responsiveness
PITA_04780	TGACG-motif	TGACG	1518	5	-	Hordeum vulgare	cis-acting regulatory element involved in the MeJA-responsiveness
PITA_04780	TGACG-motif	TGACG	1588	5	+	Hordeum vulgare	cis-acting regulatory element involved in the MeJA-responsiveness
PITA_04780	TGACG-motif	TGACG	1735	5	+	Hordeum vulgare	cis-acting regulatory element involved in the MeJA-responsiveness
PITA_04780	ABRE	ACGTG	255	5	-	Arabidopsis thaliana	cis-acting element involved in the abscisic acid responsiveness
PITA_04780	ABRE	ACGTG	339	5	+	Arabidopsis thaliana	cis-acting element involved in the abscisic acid responsiveness
PITA_04780	ABRE	ACGTG	901	5	+	Arabidopsis thaliana	cis-acting element involved in the abscisic acid responsiveness
PITA_04780	ABRE	GACACGTGGC	1165	9	+	Triticum aestivum	cis-acting element involved in the abscisic acid responsiveness
PITA_04780	TGA-element	AACGAC	267	6	+	Brassica oleracea	auxin-responsive element
PITA_04780	TGA-element	AACGAC	1184	6	+	Brassica oleracea	auxin-responsive element
PITA_04780	TGA-element	AACGAC	1319	6	-	Brassica oleracea	auxin-responsive element
PITA_04780	AE-box	AGAAACAA	1070	8	+	Arabidopsis thaliana	part of a module for light response
PITA_04978	ABRE	ACGTG	1301	5	+	Arabidopsis thaliana	cis-acting element involved in the abscisic acid responsiveness
PITA_04978	TGA-element	AACGAC	1463	6	+	Brassica oleracea	auxin-responsive element
PITA_04978	TGA-element	AACGAC	1722	6	+	Brassica oleracea	auxin-responsive element
PITA_04978	TCCC-motif	TCTCCCT	1881	7	+	Spinacia oleracea	part of a light responsive element
PITA_04978	Sp1	GGGCGG	255	6	-	Oryza sativa	light responsive element
PITA_04978	circadian	CAAAGATATC	312	9	-	Lycopersicon esculentum	cis-acting regulatory element involved in circadian control
PITA_04978	GT1-motif	GGTTAA	567	6	-	Arabidopsis thaliana	light responsive element
PITA_04978	GT1-motif	GGTTAAT	1145	7	-	Avena sativa	light responsive element
PITA_04978	GT1-motif	GGTTAA	1146	6	-	Arabidopsis thaliana	light responsive element
PITA_04978	ARE	AAACCA	71	6	+	Zea mays	cis-acting regulatory element essential for the anaerobic induction
PITA_04978	ARE	AAACCA	1420	6	-	Zea mays	cis-acting regulatory element essential for the anaerobic induction
PITA_04978	ARE	AAACCA	1701	6	+	Zea mays	cis-acting regulatory element essential for the anaerobic induction
PITA_04978	TCA-element	CCATCTTTTT	328	9	+	Nicotiana tabacum	cis-acting element involved in salicylic acid responsiveness
PITA_04978	CCAAT-box	CAACGG	1705	6	+	Hordeum vulgare	MYBHv1 binding site
PITA_04978	G-Box	CACGTT	1300	6	-	Pisum sativum	cis-acting regulatory element involved in light responsiveness
PITA_04978	Box 4	ATTAAT	612	6	+	Petroselinum crispum	part of a conserved DNA module involved in light responsiveness
PITA_04978	Box 4	ATTAAT	735	6	+	Petroselinum crispum	part of a conserved DNA module involved in light responsiveness
PITA_04978	Box 4	ATTAAT	804	6	+	Petroselinum crispum	part of a conserved DNA module involved in light responsiveness
PITA_04978	Box 4	ATTAAT	1055	6	-	Petroselinum crispum	part of a conserved DNA module involved in light responsiveness
PITA_04978	Box 4	ATTAAT	1085	6	-	Petroselinum crispum	part of a conserved DNA module involved in light responsiveness
PITA_04978	Box 4	ATTAAT	1205	6	-	Petroselinum crispum	part of a conserved DNA module involved in light responsiveness
PITA_05049	GT1-motif	GGTTAAT	689	7	+	Avena sativa	light responsive element
PITA_05049	TCA-element	CCATCTTTTT	1691	9	-	Nicotiana tabacum	cis-acting element involved in salicylic acid responsiveness
PITA_05049	GCN4_motif	TGAGTCA	796	7	+	Oryza sativa	cis-regulatory element involved in endosperm expression
PITA_05049	Box 4	ATTAAT	1396	6	-	Petroselinum crispum	part of a conserved DNA module involved in light responsiveness
PITA_05049	TCT-motif	TCTTAC	1496	6	-	Arabidopsis thaliana	part of a light responsive element
PITA_05049	TC-rich repeats	GTTTTCTTAC	207	9	-	Nicotiana tabacum	cis-acting element involved in defense and stress responsiveness
PITA_05049	CCAAT-box	CAACGG	1984	6	+	Hordeum vulgare	MYBHv1 binding site
PITA_05049	AT-rich sequence	TAAAATACT	925	9	+	Pisum sativum	element for maximal elicitor-mediated activation (2copies)
PITA_05049	O2-site	GATGATGTGG	1717	10	+	Zea mays	cis-acting regulatory element involved in zein metabolism regulation
PITA_05049	HMG-TATA-region	CTATAAATGCATTTC	1276	14	-	Lycopersicon esculentum	cis-acting regulatory element
PITA_05232	TGACG-motif	TGACG	654	5	-	Hordeum vulgare	cis-acting regulatory element involved in the MeJA-responsiveness
PITA_05232	TGACG-motif	TGACG	1451	5	-	Hordeum vulgare	cis-acting regulatory element involved in the MeJA-responsiveness
PITA_05232	TGACG-motif	TGACG	1648	5	-	Hordeum vulgare	cis-acting regulatory element involved in the MeJA-responsiveness
PITA_05232	ABRE	CACGTG	41	6	+	Arabidopsis thaliana	cis-acting element involved in the abscisic acid responsiveness
PITA_05232	ABRE	ACGTG	42	5	+	Arabidopsis thaliana	cis-acting element involved in the abscisic acid responsiveness
PITA_05232	ABRE	ACGTG	1374	5	-	Arabidopsis thaliana	cis-acting element involved in the abscisic acid responsiveness
PITA_05232	ABRE	ACGTG	1646	5	-	Arabidopsis thaliana	cis-acting element involved in the abscisic acid responsiveness
PITA_05232	ABRE	GACACGTGGC	1774	9	-	Triticum aestivum	cis-acting element involved in the abscisic acid responsiveness
PITA_05232	ABRE	CACGTG	1776	6	-	Arabidopsis thaliana	cis-acting element involved in the abscisic acid responsiveness
PITA_05232	ABRE	ACGTG	1777	5	+	Arabidopsis thaliana	cis-acting element involved in the abscisic acid responsiveness
PITA_05232	CGTCA-motif	CGTCA	654	5	+	Hordeum vulgare	cis-acting regulatory element involved in the MeJA-responsiveness
PITA_05232	CGTCA-motif	CGTCA	1451	5	+	Hordeum vulgare	cis-acting regulatory element involved in the MeJA-responsiveness
PITA_05232	CGTCA-motif	CGTCA	1648	5	+	Hordeum vulgare	cis-acting regulatory element involved in the MeJA-responsiveness
PITA_05232	ACE	CTAACGTATT	331	9	+	Petroselinum crispum	cis-acting element involved in light responsiveness
PITA_05232	AT1-motif	AATTATTTTTTATT	604	13	-	Solanum tuberosum	part of a light responsive module
PITA_05232	MRE	AACCTAA	814	7	+	Petroselinum crispum	MYB binding site involved in light responsiveness
PITA_05232	GA-motif	ATAGATAA	1703	8	-	Arabidopsis thaliana	part of a light responsive element
PITA_05232	O2-site	GATGATGTGG	1645	9	-	Zea mays	cis-acting regulatory element involved in zein metabolism regulation
PITA_05232	I-box	AGATAAGG	1701	8	-	Triticum aestivum	part of a light responsive element
PITA_05232	LTR	CCGAAA	59	6	-	Hordeum vulgare	cis-acting element involved in low-temperature responsiveness
PITA_05232	LTR	CCGAAA	1396	6	+	Hordeum vulgare	cis-acting element involved in low-temperature responsiveness
PITA_05232	MBSI	TTTTTACGGTTA	1393	11	-	Petunia hybrida	MYB binding site involved in flavonoid biosynthetic genes regulation
PITA_05232	GATA-motif	GATAGGG	46	7	+	Pisum sativum	part of a light responsive element
PITA_05232	GT1-motif	GGTTAA	574	6	-	Arabidopsis thaliana	light responsive element
PITA_05232	GT1-motif	GGTTAAT	713	7	-	Avena sativa	light responsive element
PITA_05232	GT1-motif	GGTTAA	714	6	-	Arabidopsis thaliana	light responsive element
PITA_05232	GT1-motif	GGTTAA	1392	6	-	Arabidopsis thaliana	light responsive element
PITA_05232	TCA-element	CCATCTTTTT	549	9	+	Nicotiana tabacum	cis-acting element involved in salicylic acid responsiveness
PITA_05232	TCA-element	CCATCTTTTT	1399	9	-	Nicotiana tabacum	cis-acting element involved in salicylic acid responsiveness
PITA_05232	CAT-box	GCCACT	1529	6	+	Arabidopsis thaliana	cis-acting regulatory element related to meristem expression
PITA_05232	GCN4_motif	TGAGTCA	1279	7	-	Oryza sativa	cis-regulatory element involved in endosperm expression
PITA_05232	GCN4_motif	TGAGTCA	1333	7	-	Oryza sativa	cis-regulatory element involved in endosperm expression
PITA_05232	G-Box	CACGTG	41	6	+	Pisum sativum	cis-acting regulatory element involved in light responsiveness
PITA_05232	G-Box	CACGTG	1776	6	-	Pisum sativum	cis-acting regulatory element involved in light responsiveness
PITA_05232	Box 4	ATTAAT	371	6	+	Petroselinum crispum	part of a conserved DNA module involved in light responsiveness
PITA_05232	Box 4	ATTAAT	586	6	+	Petroselinum crispum	part of a conserved DNA module involved in light responsiveness
PITA_05232	Box 4	ATTAAT	622	6	+	Petroselinum crispum	part of a conserved DNA module involved in light responsiveness
PITA_05232	Box 4	ATTAAT	804	6	+	Petroselinum crispum	part of a conserved DNA module involved in light responsiveness
PITA_05232	Box 4	ATTAAT	838	6	+	Petroselinum crispum	part of a conserved DNA module involved in light responsiveness
PITA_05232	TCT-motif	TCTTAC	1474	6	+	Arabidopsis thaliana	part of a light responsive element
PITA_05232	G-box	CACGTG	41	6	+	Arabidopsis thaliana	cis-acting regulatory element involved in light responsiveness
PITA_05232	G-box	CACGTC	1374	6	+	Zea mays	cis-acting regulatory element involved in light responsiveness
PITA_05232	G-box	CACGTC	1646	6	+	Zea mays	cis-acting regulatory element involved in light responsiveness
PITA_05232	G-box	GCCACGTGGA	1774	9	+	Arabidopsis thaliana	cis-acting regulatory element involved in light responsiveness
PITA_05232	G-box	CACGTG	1776	6	-	Arabidopsis thaliana	cis-acting regulatory element involved in light responsiveness
PITA_05232	G-box	CACGAC	2013	6	+	Zea mays	cis-acting regulatory element involved in light responsiveness
PITA_05248	AT-rich element	ATAGAAATCAA	1059	10	+	Glycine max	binding site of AT-rich DNA binding protein (ATBP-1)
PITA_05248	TGACG-motif	TGACG	1358	5	+	Hordeum vulgare	cis-acting regulatory element involved in the MeJA-responsiveness
PITA_05248	TGACG-motif	TGACG	1696	5	-	Hordeum vulgare	cis-acting regulatory element involved in the MeJA-responsiveness
PITA_05248	TGACG-motif	TGACG	1794	5	-	Hordeum vulgare	cis-acting regulatory element involved in the MeJA-responsiveness
PITA_05248	ABRE	ACGTG	902	5	+	Arabidopsis thaliana	cis-acting element involved in the abscisic acid responsiveness
PITA_05248	ABRE	ACGTG	960	5	-	Arabidopsis thaliana	cis-acting element involved in the abscisic acid responsiveness
PITA_05248	ABRE	ACGTG	982	5	-	Arabidopsis thaliana	cis-acting element involved in the abscisic acid responsiveness
PITA_05248	ABRE	CACGTG	1176	6	-	Arabidopsis thaliana	cis-acting element involved in the abscisic acid responsiveness
PITA_05248	ABRE	ACGTG	1177	5	+	Arabidopsis thaliana	cis-acting element involved in the abscisic acid responsiveness
PITA_05248	ABRE	CACGTG	1607	6	-	Arabidopsis thaliana	cis-acting element involved in the abscisic acid responsiveness
PITA_05248	ABRE	ACGTG	1608	5	+	Arabidopsis thaliana	cis-acting element involved in the abscisic acid responsiveness
PITA_05248	ABRE	ACGTG	1694	5	-	Arabidopsis thaliana	cis-acting element involved in the abscisic acid responsiveness
PITA_05248	chs-CMA1a	TTACTTAA	560	8	+	Daucus carota	part of a light responsive element
PITA_05248	CGTCA-motif	CGTCA	1358	5	-	Hordeum vulgare	cis-acting regulatory element involved in the MeJA-responsiveness
PITA_05248	CGTCA-motif	CGTCA	1696	5	+	Hordeum vulgare	cis-acting regulatory element involved in the MeJA-responsiveness
PITA_05248	CGTCA-motif	CGTCA	1794	5	+	Hordeum vulgare	cis-acting regulatory element involved in the MeJA-responsiveness
PITA_05248	TCCC-motif	TCTCCCT	1650	7	+	Spinacia oleracea	part of a light responsive element
PITA_05248	I-box	GTATAAGGCC	1324	9	-	Larix laricina	part of a light responsive element
PITA_05248	MSA-like	(T/C)C(T/C)AACGG(T/C)(T/C)A	1341	8.5	+	Catharanthus roseus	cis-acting element involved in cell cycle regulation
PITA_05248	TCA-element	TCAGAAGAGG	151	9	+	Brassica oleracea	cis-acting element involved in salicylic acid responsiveness
PITA_05248	TCA-element	TCAGAAGAGG	1901	9	-	Brassica oleracea	cis-acting element involved in salicylic acid responsiveness
PITA_05248	GT1-motif	GGTTAA	1253	6	+	Arabidopsis thaliana	light responsive element
PITA_05248	LTR	CCGAAA	1316	6	+	Hordeum vulgare	cis-acting element involved in low-temperature responsiveness
PITA_05248	G-Box	TCCACATGGCA	840	10	-	Triticum aestivum	cis-acting regulatory element involved in light responsiveness
PITA_05248	G-Box	CACGTT	901	6	-	Pisum sativum	cis-acting regulatory element involved in light responsiveness
PITA_05248	G-Box	CACGTT	960	6	+	Pisum sativum	cis-acting regulatory element involved in light responsiveness
PITA_05248	G-Box	CACGTT	982	6	+	Pisum sativum	cis-acting regulatory element involved in light responsiveness
PITA_05248	G-Box	CACGTG	1176	6	-	Pisum sativum	cis-acting regulatory element involved in light responsiveness
PITA_05248	G-Box	CACGTG	1607	6	-	Pisum sativum	cis-acting regulatory element involved in light responsiveness
PITA_05248	Box 4	ATTAAT	272	6	+	Petroselinum crispum	part of a conserved DNA module involved in light responsiveness
PITA_05248	Box 4	ATTAAT	429	6	+	Petroselinum crispum	part of a conserved DNA module involved in light responsiveness
PITA_05248	Box 4	ATTAAT	529	6	+	Petroselinum crispum	part of a conserved DNA module involved in light responsiveness
PITA_05248	Box 4	ATTAAT	540	6	+	Petroselinum crispum	part of a conserved DNA module involved in light responsiveness
PITA_05248	Box 4	ATTAAT	575	6	+	Petroselinum crispum	part of a conserved DNA module involved in light responsiveness
PITA_05248	G-box	TAAACGTG	960	8	-	Brassica oleracea	cis-acting regulatory element involved in light responsiveness
PITA_05248	G-box	TAAACGTG	982	8	-	Brassica oleracea	cis-acting regulatory element involved in light responsiveness
PITA_05248	G-box	GCCACGTGGA	1174	9	+	Arabidopsis thaliana	cis-acting regulatory element involved in light responsiveness
PITA_05248	G-box	CACGTG	1176	6	-	Arabidopsis thaliana	cis-acting regulatory element involved in light responsiveness
PITA_05248	G-box	CACGTG	1607	6	-	Arabidopsis thaliana	cis-acting regulatory element involved in light responsiveness
PITA_05248	G-box	CACGTC	1694	6	+	Zea mays	cis-acting regulatory element involved in light responsiveness
PITA_05248	CCAAT-box	CAACGG	1624	6	+	Hordeum vulgare	MYBHv1 binding site
PITA_05436	CAT-box	GCCACT	1987	6	+	Arabidopsis thaliana	cis-acting regulatory element related to meristem expression
PITA_05436	LS7	CAGATTTATTTTTA	1685	13	+	Zea mays	part of a light responsive element
PITA_05436	GT1-motif	GGTTAA	1593	6	-	Arabidopsis thaliana	light responsive element
PITA_05436	GT1-motif	GGTTAA	1958	6	-	Arabidopsis thaliana	light responsive element
PITA_05723	TCCC-motif	TCTCCCT	527	7	+	Spinacia oleracea	part of a light responsive element
PITA_05723	P-box	CCTTTTG	856	7	-	Oryza sativa	gibberellin-responsive element
PITA_05723	CGTCA-motif	CGTCA	805	5	-	Hordeum vulgare	cis-acting regulatory element involved in the MeJA-responsiveness
PITA_05723	CGTCA-motif	CGTCA	883	5	-	Hordeum vulgare	cis-acting regulatory element involved in the MeJA-responsiveness
PITA_05723	TGACG-motif	TGACG	805	5	+	Hordeum vulgare	cis-acting regulatory element involved in the MeJA-responsiveness
PITA_05723	TGACG-motif	TGACG	883	5	+	Hordeum vulgare	cis-acting regulatory element involved in the MeJA-responsiveness
PITA_05723	AE-box	AGAAACTT	1023	8	-	Arabidopsis thaliana	part of a module for light response
PITA_05723	TGA-element	AACGAC	68	6	+	Brassica oleracea	auxin-responsive element
PITA_05723	TGA-element	AACGAC	347	6	+	Brassica oleracea	auxin-responsive element
PITA_05723	CCAAT-box	CAACGG	136	6	-	Hordeum vulgare	MYBHv1 binding site
PITA_05723	CCAAT-box	CAACGG	484	6	+	Hordeum vulgare	MYBHv1 binding site
PITA_05723	GTGGC-motif	GATTCTGTGGC	295	10	+	Spinacia oleracea	part of a light responsive element
PITA_05723	Box 4	ATTAAT	115	6	+	Petroselinum crispum	part of a conserved DNA module involved in light responsiveness
PITA_05723	Box 4	ATTAAT	1665	6	-	Petroselinum crispum	part of a conserved DNA module involved in light responsiveness
PITA_05723	Box 4	ATTAAT	1691	6	-	Petroselinum crispum	part of a conserved DNA module involved in light responsiveness
PITA_05723	TCT-motif	TCTTAC	1264	6	+	Arabidopsis thaliana	part of a light responsive element
PITA_05723	TCT-motif	TCTTAC	1742	6	+	Arabidopsis thaliana	part of a light responsive element
PITA_05723	MBS	CAACTG	400	6	-	Arabidopsis thaliana	MYB binding site involved in drought-inducibility
PITA_05723	MBS	CAACTG	1383	6	-	Arabidopsis thaliana	MYB binding site involved in drought-inducibility
PITA_05723	ARE	AAACCA	24	6	-	Zea mays	cis-acting regulatory element essential for the anaerobic induction
PITA_05723	ARE	AAACCA	632	6	+	Zea mays	cis-acting regulatory element essential for the anaerobic induction
PITA_05723	ARE	AAACCA	922	6	-	Zea mays	cis-acting regulatory element essential for the anaerobic induction
PITA_05723	ARE	AAACCA	1273	6	-	Zea mays	cis-acting regulatory element essential for the anaerobic induction
PITA_05728	A-box	CCGTCC	888	6	+	Petroselinum crispum	cis-acting regulatory element
PITA_05728	AT-rich sequence	TAAAATACT	1054	9	+	Pisum sativum	element for maximal elicitor-mediated activation (2copies)
PITA_05728	TCCC-motif	TCTCCCT	1975	7	-	Spinacia oleracea	part of a light responsive element
PITA_05728	I-box	cCATATCCAAT	479	10	-	Flaveria trinervia	part of a light responsive element
PITA_05728	chs-CMA1a	TTACTTAA	157	8	-	Daucus carota	part of a light responsive element
PITA_05728	MRE	AACCTAA	762	7	-	Petroselinum crispum	MYB binding site involved in light responsiveness
PITA_05728	MRE	AACCTAA	1459	7	+	Petroselinum crispum	MYB binding site involved in light responsiveness
PITA_05728	Box 4	ATTAAT	80	6	+	Petroselinum crispum	part of a conserved DNA module involved in light responsiveness
PITA_05728	Box 4	ATTAAT	915	6	+	Petroselinum crispum	part of a conserved DNA module involved in light responsiveness
PITA_05728	Box 4	ATTAAT	930	6	+	Petroselinum crispum	part of a conserved DNA module involved in light responsiveness
PITA_05728	Box 4	ATTAAT	1066	6	-	Petroselinum crispum	part of a conserved DNA module involved in light responsiveness
PITA_05728	Box 4	ATTAAT	1155	6	-	Petroselinum crispum	part of a conserved DNA module involved in light responsiveness
PITA_05728	Box 4	ATTAAT	1203	6	-	Petroselinum crispum	part of a conserved DNA module involved in light responsiveness
PITA_05728	Box 4	ATTAAT	1241	6	-	Petroselinum crispum	part of a conserved DNA module involved in light responsiveness
PITA_05728	Box 4	ATTAAT	1294	6	-	Petroselinum crispum	part of a conserved DNA module involved in light responsiveness
PITA_05728	GATA-motif	GATAGGA	313	7	-	Arabidopsis thaliana	part of a light responsive element
PITA_05728	ARE	AAACCA	340	6	-	Zea mays	cis-acting regulatory element essential for the anaerobic induction
PITA_05728	GT1-motif	GGTTAAT	68	7	-	Avena sativa	light responsive element
PITA_05728	GT1-motif	GGTTAA	69	6	-	Arabidopsis thaliana	light responsive element
PITA_05728	GT1-motif	GGTTAA	188	6	-	Arabidopsis thaliana	light responsive element
PITA_05728	GT1-motif	GGTTAA	765	6	+	Arabidopsis thaliana	light responsive element
PITA_05728	GT1-motif	GGTTAA	1333	6	-	Arabidopsis thaliana	light responsive element
PITA_05728	TCA-element	CCATCTTTTT	1110	9	+	Nicotiana tabacum	cis-acting element involved in salicylic acid responsiveness
PITA_05778	ABRE	CGTACGTGCA	1701	9	-	Hordeum vulgare	cis-acting element involved in the abscisic acid responsiveness
PITA_05778	GATA-motif	GATAGGG	965	7	+	Pisum sativum	part of a light responsive element
PITA_05778	TCA-element	CCATCTTTTT	1058	9	+	Nicotiana tabacum	cis-acting element involved in salicylic acid responsiveness
PITA_05778	TCA-element	CCATCTTTTT	1945	9	+	Nicotiana tabacum	cis-acting element involved in salicylic acid responsiveness
PITA_05778	TATC-box	TATCCCA	650	7	+	Oryza sativa	cis-acting element involved in gibberellin-responsiveness
PITA_05778	CAT-box	GCCACT	289	6	+	Arabidopsis thaliana	cis-acting regulatory element related to meristem expression
PITA_05778	AT-rich element	ATAGAAATCAA	1835	10	+	Glycine max	binding site of AT-rich DNA binding protein (ATBP-1)
PITA_05778	ARE	AAACCA	251	6	-	Zea mays	cis-acting regulatory element essential for the anaerobic induction
PITA_05778	ARE	AAACCA	706	6	-	Zea mays	cis-acting regulatory element essential for the anaerobic induction
PITA_05778	ARE	AAACCA	1973	6	-	Zea mays	cis-acting regulatory element essential for the anaerobic induction
PITA_05778	GA-motif	ATAGATAA	67	8	-	Arabidopsis thaliana	part of a light responsive element
PITA_05778	Box 4	ATTAAT	20	6	+	Petroselinum crispum	part of a conserved DNA module involved in light responsiveness
PITA_05778	Box 4	ATTAAT	1096	6	-	Petroselinum crispum	part of a conserved DNA module involved in light responsiveness
PITA_05778	Box 4	ATTAAT	1184	6	-	Petroselinum crispum	part of a conserved DNA module involved in light responsiveness
PITA_05778	Box 4	ATTAAT	1274	6	-	Petroselinum crispum	part of a conserved DNA module involved in light responsiveness
PITA_05778	TCT-motif	TCTTAC	457	6	-	Arabidopsis thaliana	part of a light responsive element
PITA_05778	TCT-motif	TCTTAC	537	6	-	Arabidopsis thaliana	part of a light responsive element
PITA_05778	TCT-motif	TCTTAC	598	6	-	Arabidopsis thaliana	part of a light responsive element
PITA_05778	GC-motif	CCCCCG	1891	6	+	Zea mays	enhancer-like element involved in anoxic specific inducibility
PITA_05918	G-Box	CACGTT	1367	6	-	Pisum sativum	cis-acting regulatory element involved in light responsiveness
PITA_05918	TCT-motif	TCTTAC	1337	6	+	Arabidopsis thaliana	part of a light responsive element
PITA_05918	Box 4	ATTAAT	1197	6	-	Petroselinum crispum	part of a conserved DNA module involved in light responsiveness
PITA_05918	Box 4	ATTAAT	1789	6	-	Petroselinum crispum	part of a conserved DNA module involved in light responsiveness
PITA_05918	circadian	CAAAGATATC	1329	9	+	Lycopersicon esculentum	cis-acting regulatory element involved in circadian control
PITA_05918	GATA-motif	GATAGGG	1278	7	-	Pisum sativum	part of a light responsive element
PITA_05918	GARE-motif	TCTGTTG	40	7	+	Brassica oleracea	gibberellin-responsive element
PITA_05918	AT-rich sequence	TAAAATACT	435	9	-	Pisum sativum	element for maximal elicitor-mediated activation (2copies)
PITA_05918	GA-motif	ATAGATAA	802	8	+	Arabidopsis thaliana	part of a light responsive element
PITA_05918	GA-motif	ATAGATAA	1318	8	+	Arabidopsis thaliana	part of a light responsive element
PITA_05918	LAMP-element	CTTTATCA	1186	8	+	Pisum sativum	part of a light responsive element
PITA_05918	MRE	AACCTAA	1243	7	-	Petroselinum crispum	MYB binding site involved in light responsiveness
PITA_05918	G-box	CACGAC	1775	6	-	Zea mays	cis-acting regulatory element involved in light responsiveness
PITA_05918	TCA-element	CCATCTTTTT	172	9	-	Nicotiana tabacum	cis-acting element involved in salicylic acid responsiveness
PITA_05918	TCA-element	CCATCTTTTT	1072	9	+	Nicotiana tabacum	cis-acting element involved in salicylic acid responsiveness
PITA_05918	MBS	CAACTG	215	6	-	Arabidopsis thaliana	MYB binding site involved in drought-inducibility
PITA_05918	ATCT-motif	AATCTAATCC	194	9	-	Pisum sativum	part of a conserved DNA module involved in light responsiveness
PITA_05918	ARE	AAACCA	1226	6	-	Zea mays	cis-acting regulatory element essential for the anaerobic induction
PITA_05918	ARE	AAACCA	1499	6	+	Zea mays	cis-acting regulatory element essential for the anaerobic induction
PITA_05918	AuxRR-core	GGTCCAT	714	7	+	Nicotiana tabacum	cis-acting regulatory element involved in auxin responsiveness
PITA_05918	I-box	cCATATCCAAT	923	10	+	Flaveria trinervia	part of a light responsive element
PITA_05918	I-box	cCATATCCAAT	1688	10	+	Flaveria trinervia	part of a light responsive element
PITA_05918	ABRE	ACGTG	1368	5	+	Arabidopsis thaliana	cis-acting element involved in the abscisic acid responsiveness
PITA_05918	TGACG-motif	TGACG	1215	5	-	Hordeum vulgare	cis-acting regulatory element involved in the MeJA-responsiveness
PITA_05918	TGACG-motif	TGACG	1668	5	+	Hordeum vulgare	cis-acting regulatory element involved in the MeJA-responsiveness
PITA_05918	CGTCA-motif	CGTCA	1215	5	+	Hordeum vulgare	cis-acting regulatory element involved in the MeJA-responsiveness
PITA_05918	CGTCA-motif	CGTCA	1668	5	-	Hordeum vulgare	cis-acting regulatory element involved in the MeJA-responsiveness
PITA_06063	3-AF3 binding site	CACTATCTAAC	1642	10	-	Pisum sativum	part of a conserved DNA module array (CMA3)
PITA_06063	CCAAT-box	CAACGG	1658	6	+	Hordeum vulgare	MYBHv1 binding site
PITA_06063	Box 4	ATTAAT	318	6	+	Petroselinum crispum	part of a conserved DNA module involved in light responsiveness
PITA_06063	Box 4	ATTAAT	1124	6	-	Petroselinum crispum	part of a conserved DNA module involved in light responsiveness
PITA_06063	Box 4	ATTAAT	1135	6	-	Petroselinum crispum	part of a conserved DNA module involved in light responsiveness
PITA_06063	G-Box	CACGTT	1286	6	-	Pisum sativum	cis-acting regulatory element involved in light responsiveness
PITA_06063	G-Box	CACGTT	1557	6	+	Pisum sativum	cis-acting regulatory element involved in light responsiveness
PITA_06063	GCN4_motif	TGAGTCA	1173	7	-	Oryza sativa	cis-regulatory element involved in endosperm expression
PITA_06063	chs-CMA2a	TCACTTGA	1239	8	+	Petroselinum crispum	part of a light responsive element
PITA_06063	ARE	AAACCA	332	6	+	Zea mays	cis-acting regulatory element essential for the anaerobic induction
PITA_06063	ARE	AAACCA	686	6	+	Zea mays	cis-acting regulatory element essential for the anaerobic induction
PITA_06063	ARE	AAACCA	1982	6	-	Zea mays	cis-acting regulatory element essential for the anaerobic induction
PITA_06063	TCCC-motif	TCTCCCT	1455	7	-	Spinacia oleracea	part of a light responsive element
PITA_06063	ABRE	ACGTG	1287	5	+	Arabidopsis thaliana	cis-acting element involved in the abscisic acid responsiveness
PITA_06063	ABRE	ACGTG	1557	5	-	Arabidopsis thaliana	cis-acting element involved in the abscisic acid responsiveness
PITA_06063	Gap-box	CAAATGAA(A/G)A	1277	9	+	Arabidopsis thaliana	part of a light responsive element
PITA_06063	MRE	AACCTAA	326	7	+	Petroselinum crispum	MYB binding site involved in light responsiveness
PITA_06063	MRE	AACCTAA	354	7	+	Petroselinum crispum	MYB binding site involved in light responsiveness
PITA_06063	MRE	AACCTAA	364	7	+	Petroselinum crispum	MYB binding site involved in light responsiveness
PITA_06095	G-Box	CACGTT	1287	6	+	Pisum sativum	cis-acting regulatory element involved in light responsiveness
PITA_06095	G-box	CACGAC	1710	6	-	Zea mays	cis-acting regulatory element involved in light responsiveness
PITA_06095	G-box	TACGTG	1775	6	-	Arabidopsis thaliana	cis-acting regulatory element involved in light responsiveness
PITA_06095	G-box	CACGTC	2002	6	-	Zea mays	cis-acting regulatory element involved in light responsiveness
PITA_06095	Box 4	ATTAAT	336	6	+	Petroselinum crispum	part of a conserved DNA module involved in light responsiveness
PITA_06095	Box 4	ATTAAT	669	6	+	Petroselinum crispum	part of a conserved DNA module involved in light responsiveness
PITA_06095	TC-rich repeats	GTTTTCTTAC	1290	9	+	Nicotiana tabacum	cis-acting element involved in defense and stress responsiveness
PITA_06095	MBS	CAACTG	941	6	-	Arabidopsis thaliana	MYB binding site involved in drought-inducibility
PITA_06095	GT1-motif	GGTTAAT	1529	7	-	Avena sativa	light responsive element
PITA_06095	GT1-motif	GGTTAA	1530	6	-	Arabidopsis thaliana	light responsive element
PITA_06095	ARE	AAACCA	605	6	+	Zea mays	cis-acting regulatory element essential for the anaerobic induction
PITA_06095	GATA-motif	GATAGGG	1702	7	-	Pisum sativum	part of a light responsive element
PITA_06095	LTR	CCGAAA	600	6	+	Hordeum vulgare	cis-acting element involved in low-temperature responsiveness
PITA_06095	GARE-motif	TCTGTTG	1961	7	+	Brassica oleracea	gibberellin-responsive element
PITA_06095	A-box	CCGTCC	1141	6	-	Petroselinum crispum	cis-acting regulatory element
PITA_06095	GC-motif	CCCCCG	597	6	+	Zea mays	enhancer-like element involved in anoxic specific inducibility
PITA_06095	MRE	AACCTAA	390	7	+	Petroselinum crispum	MYB binding site involved in light responsiveness
PITA_06095	MRE	AACCTAA	655	7	+	Petroselinum crispum	MYB binding site involved in light responsiveness
PITA_06095	ATC-motif	AGTAATCT	35	8	-	Spinacia oleracea	part of a conserved DNA module involved in light responsiveness
PITA_06095	AT-rich element	ATAGAAATCAA	1473	10	+	Glycine max	binding site of AT-rich DNA binding protein (ATBP-1)
PITA_06095	AT1-motif	AATTATTTTTTATT	234	13	+	Solanum tuberosum	part of a light responsive module
PITA_06095	ABRE	ACGTG	1287	5	-	Arabidopsis thaliana	cis-acting element involved in the abscisic acid responsiveness
PITA_06095	ABRE	ACGTG	1775	5	-	Arabidopsis thaliana	cis-acting element involved in the abscisic acid responsiveness
PITA_06095	ABRE	ACGTG	2003	5	+	Arabidopsis thaliana	cis-acting element involved in the abscisic acid responsiveness
PITA_06125	TCCC-motif	TCTCCCT	1271	7	+	Spinacia oleracea	part of a light responsive element
PITA_06125	ACA-motif	AATTACAGCCATT	1632	12	+	Pisum sativum	part of gapA in (gapA-CMA1) involved with light responsiveness
PITA_06125	ABRE	AACCCGG	820	7	-	Arabidopsis thaliana	cis-acting element involved in the abscisic acid responsiveness
PITA_06125	LAMP-element	CTTTATCA	1229	8	+	Pisum sativum	part of a light responsive element
PITA_06125	TC-rich repeats	GTTTTCTTAC	1030	9	+	Nicotiana tabacum	cis-acting element involved in defense and stress responsiveness
PITA_06125	TATC-box	TATCCCA	1172	7	-	Oryza sativa	cis-acting element involved in gibberellin-responsiveness
PITA_06125	Box 4	ATTAAT	1345	6	-	Petroselinum crispum	part of a conserved DNA module involved in light responsiveness
PITA_06125	TCT-motif	TCTTAC	985	6	+	Arabidopsis thaliana	part of a light responsive element
PITA_06125	TCT-motif	TCTTAC	1034	6	+	Arabidopsis thaliana	part of a light responsive element
PITA_06125	TCT-motif	TCTTAC	1566	6	+	Arabidopsis thaliana	part of a light responsive element
PITA_06125	GATA-motif	GATAGGA	1940	7	-	Arabidopsis thaliana	part of a light responsive element
PITA_06125	MBS	CAACTG	1468	6	-	Arabidopsis thaliana	MYB binding site involved in drought-inducibility
PITA_06125	AuxRR-core	GGTCCAT	1814	7	-	Nicotiana tabacum	cis-acting regulatory element involved in auxin responsiveness
PITA_06125	GT1-motif	GGTTAA	2019	6	+	Arabidopsis thaliana	light responsive element
PITA_06125	ATCT-motif	AATCTAATCC	1395	9	-	Pisum sativum	part of a conserved DNA module involved in light responsiveness
PITA_06260	RY-element	CATGCATG	1953	8	-	Helianthus annuus	cis-acting regulatory element involved in seed-specific regulation
PITA_06260	CAT-box	GCCACT	1351	6	-	Arabidopsis thaliana	cis-acting regulatory element related to meristem expression
PITA_06260	TCT-motif	TCTTAC	2002	6	+	Arabidopsis thaliana	part of a light responsive element
PITA_06260	G-box	CACGTC	1967	6	-	Zea mays	cis-acting regulatory element involved in light responsiveness
PITA_06260	G-box	CACGTG	1982	6	-	Arabidopsis thaliana	cis-acting regulatory element involved in light responsiveness
PITA_06260	G-Box	CACGTG	1982	6	-	Pisum sativum	cis-acting regulatory element involved in light responsiveness
PITA_06260	GATA-motif	AAGATAAGATT	151	10	-	Arabidopsis thaliana	part of a light responsive element
PITA_06260	MBS	CAACTG	173	6	-	Arabidopsis thaliana	MYB binding site involved in drought-inducibility
PITA_06260	MBS	CAACTG	1444	6	-	Arabidopsis thaliana	MYB binding site involved in drought-inducibility
PITA_06260	ARE	AAACCA	188	6	+	Zea mays	cis-acting regulatory element essential for the anaerobic induction
PITA_06260	ARE	AAACCA	403	6	+	Zea mays	cis-acting regulatory element essential for the anaerobic induction
PITA_06260	ARE	AAACCA	612	6	-	Zea mays	cis-acting regulatory element essential for the anaerobic induction
PITA_06260	ARE	AAACCA	633	6	+	Zea mays	cis-acting regulatory element essential for the anaerobic induction
PITA_06260	ARE	AAACCA	712	6	-	Zea mays	cis-acting regulatory element essential for the anaerobic induction
PITA_06260	ARE	AAACCA	1301	6	-	Zea mays	cis-acting regulatory element essential for the anaerobic induction
PITA_06260	ARE	AAACCA	1455	6	-	Zea mays	cis-acting regulatory element essential for the anaerobic induction
PITA_06260	ARE	AAACCA	1722	6	-	Zea mays	cis-acting regulatory element essential for the anaerobic induction
PITA_06260	ARE	AAACCA	1869	6	-	Zea mays	cis-acting regulatory element essential for the anaerobic induction
PITA_06260	O2-site	GATGA(C/T)(A/G)TG(A/G)	546	8	-	Zea mays	cis-acting regulatory element involved in zein metabolism regulation
PITA_06260	GARE-motif	TCTGTTG	1419	7	+	Brassica oleracea	gibberellin-responsive element
PITA_06260	I-box	AGATAAGG	811	8	-	Triticum aestivum	part of a light responsive element
PITA_06260	TCCC-motif	TCTCCCT	1683	7	-	Spinacia oleracea	part of a light responsive element
PITA_06260	WUN-motif	AAATTTCCT	1083	9	+	Brassica oleracea	wound-responsive element
PITA_06260	CGTCA-motif	CGTCA	261	5	-	Hordeum vulgare	cis-acting regulatory element involved in the MeJA-responsiveness
PITA_06260	CGTCA-motif	CGTCA	699	5	+	Hordeum vulgare	cis-acting regulatory element involved in the MeJA-responsiveness
PITA_06260	CGTCA-motif	CGTCA	767	5	+	Hordeum vulgare	cis-acting regulatory element involved in the MeJA-responsiveness
PITA_06260	CGTCA-motif	CGTCA	1469	5	+	Hordeum vulgare	cis-acting regulatory element involved in the MeJA-responsiveness
PITA_06260	CGTCA-motif	CGTCA	1966	5	-	Hordeum vulgare	cis-acting regulatory element involved in the MeJA-responsiveness
PITA_06260	P-box	CCTTTTG	256	7	+	Oryza sativa	gibberellin-responsive element
PITA_06260	HD-Zip 1	CAAT(A/T)ATTG	1651	8.5	-	Arabidopsis thaliana	element involved in differentiation of the palisade mesophyll cells
PITA_06260	HD-Zip 1	CAAT(A/T)ATTG	1730	8.5	-	Arabidopsis thaliana	element involved in differentiation of the palisade mesophyll cells
PITA_06260	TGACG-motif	TGACG	261	5	+	Hordeum vulgare	cis-acting regulatory element involved in the MeJA-responsiveness
PITA_06260	TGACG-motif	TGACG	699	5	-	Hordeum vulgare	cis-acting regulatory element involved in the MeJA-responsiveness
PITA_06260	TGACG-motif	TGACG	767	5	-	Hordeum vulgare	cis-acting regulatory element involved in the MeJA-responsiveness
PITA_06260	TGACG-motif	TGACG	1469	5	-	Hordeum vulgare	cis-acting regulatory element involved in the MeJA-responsiveness
PITA_06260	TGACG-motif	TGACG	1966	5	+	Hordeum vulgare	cis-acting regulatory element involved in the MeJA-responsiveness
PITA_06260	ABRE	ACGTG	1968	5	+	Arabidopsis thaliana	cis-acting element involved in the abscisic acid responsiveness
PITA_06260	ABRE	CACGTG	1982	6	-	Arabidopsis thaliana	cis-acting element involved in the abscisic acid responsiveness
PITA_06260	ABRE	ACGTG	1983	5	+	Arabidopsis thaliana	cis-acting element involved in the abscisic acid responsiveness
PITA_06282	CGTCA-motif	CGTCA	942	5	+	Hordeum vulgare	cis-acting regulatory element involved in the MeJA-responsiveness
PITA_06282	TGACG-motif	TGACG	942	5	-	Hordeum vulgare	cis-acting regulatory element involved in the MeJA-responsiveness
PITA_06282	MRE	AACCTAA	706	7	+	Petroselinum crispum	MYB binding site involved in light responsiveness
PITA_06282	LTR	CCGAAA	1173	6	+	Hordeum vulgare	cis-acting element involved in low-temperature responsiveness
PITA_06282	ARE	AAACCA	572	6	-	Zea mays	cis-acting regulatory element essential for the anaerobic induction
PITA_06282	ARE	AAACCA	1184	6	+	Zea mays	cis-acting regulatory element essential for the anaerobic induction
PITA_06282	ARE	AAACCA	1232	6	-	Zea mays	cis-acting regulatory element essential for the anaerobic induction
PITA_06282	ARE	AAACCA	1445	6	+	Zea mays	cis-acting regulatory element essential for the anaerobic induction
PITA_06282	ARE	AAACCA	1524	6	+	Zea mays	cis-acting regulatory element essential for the anaerobic induction
PITA_06282	ARE	AAACCA	1576	6	+	Zea mays	cis-acting regulatory element essential for the anaerobic induction
PITA_06282	ARE	AAACCA	1686	6	-	Zea mays	cis-acting regulatory element essential for the anaerobic induction
PITA_06282	ARE	AAACCA	1719	6	+	Zea mays	cis-acting regulatory element essential for the anaerobic induction
PITA_06282	AuxRR-core	GGTCCAT	1389	7	-	Nicotiana tabacum	cis-acting regulatory element involved in auxin responsiveness
PITA_06282	GT1-motif	GGTTAA	923	6	+	Arabidopsis thaliana	light responsive element
PITA_06282	CCAAT-box	CAACGG	240	6	-	Hordeum vulgare	MYBHv1 binding site
PITA_06282	TATC-box	TATCCCA	698	7	-	Oryza sativa	cis-acting element involved in gibberellin-responsiveness
PITA_06282	Box 4	ATTAAT	263	6	+	Petroselinum crispum	part of a conserved DNA module involved in light responsiveness
PITA_06282	Box 4	ATTAAT	271	6	+	Petroselinum crispum	part of a conserved DNA module involved in light responsiveness
PITA_06282	Box 4	ATTAAT	482	6	+	Petroselinum crispum	part of a conserved DNA module involved in light responsiveness
PITA_06282	Box 4	ATTAAT	503	6	+	Petroselinum crispum	part of a conserved DNA module involved in light responsiveness
PITA_06282	Box 4	ATTAAT	902	6	+	Petroselinum crispum	part of a conserved DNA module involved in light responsiveness
PITA_06282	Box 4	ATTAAT	909	6	+	Petroselinum crispum	part of a conserved DNA module involved in light responsiveness
PITA_06282	Box 4	ATTAAT	1267	6	-	Petroselinum crispum	part of a conserved DNA module involved in light responsiveness
PITA_06282	G-box	CACGAC	1682	6	-	Zea mays	cis-acting regulatory element involved in light responsiveness
PITA_06282	G-box	CACGAC	1838	6	-	Zea mays	cis-acting regulatory element involved in light responsiveness
PITA_06552	CAT-box	GCCACT	781	6	+	Arabidopsis thaliana	cis-acting regulatory element related to meristem expression
PITA_06552	G-box	CCACGTAA	1713	8	+	Brassica napus	cis-acting regulatory element involved in light responsiveness
PITA_06552	G-box	TACGTG	1714	6	-	Arabidopsis thaliana	cis-acting regulatory element involved in light responsiveness
PITA_06552	Sp1	GGGCGG	467	6	-	Oryza sativa	light responsive element
PITA_06552	MBS	CAACTG	258	6	+	Arabidopsis thaliana	MYB binding site involved in drought-inducibility
PITA_06552	ARE	AAACCA	710	6	-	Zea mays	cis-acting regulatory element essential for the anaerobic induction
PITA_06552	GC-motif	CCCCCG	1414	6	+	Zea mays	enhancer-like element involved in anoxic specific inducibility
PITA_06552	TCCC-motif	TCTCCCT	1881	7	+	Spinacia oleracea	part of a light responsive element
PITA_06552	CGTCA-motif	CGTCA	358	5	-	Hordeum vulgare	cis-acting regulatory element involved in the MeJA-responsiveness
PITA_06552	CGTCA-motif	CGTCA	583	5	-	Hordeum vulgare	cis-acting regulatory element involved in the MeJA-responsiveness
PITA_06552	CGTCA-motif	CGTCA	716	5	+	Hordeum vulgare	cis-acting regulatory element involved in the MeJA-responsiveness
PITA_06552	CGTCA-motif	CGTCA	1374	5	-	Hordeum vulgare	cis-acting regulatory element involved in the MeJA-responsiveness
PITA_06552	ABRE	ACGTG	1714	5	-	Arabidopsis thaliana	cis-acting element involved in the abscisic acid responsiveness
PITA_06552	TGACG-motif	TGACG	358	5	+	Hordeum vulgare	cis-acting regulatory element involved in the MeJA-responsiveness
PITA_06552	TGACG-motif	TGACG	583	5	+	Hordeum vulgare	cis-acting regulatory element involved in the MeJA-responsiveness
PITA_06552	TGACG-motif	TGACG	716	5	-	Hordeum vulgare	cis-acting regulatory element involved in the MeJA-responsiveness
PITA_06552	TGACG-motif	TGACG	1374	5	+	Hordeum vulgare	cis-acting regulatory element involved in the MeJA-responsiveness
PITA_06552	AE-box	AGAAACAA	646	8	-	Arabidopsis thaliana	part of a module for light response
PITA_06555	P-box	CCTTTTG	145	7	-	Oryza sativa	gibberellin-responsive element
PITA_06555	AE-box	AGAAACTT	794	8	+	Arabidopsis thaliana	part of a module for light response
PITA_06555	GARE-motif	TCTGTTG	1707	7	-	Brassica oleracea	gibberellin-responsive element
PITA_06555	LTR	CCGAAA	1131	6	+	Hordeum vulgare	cis-acting element involved in low-temperature responsiveness
PITA_06555	circadian	CAAAGATATC	1986	9	-	Lycopersicon esculentum	cis-acting regulatory element involved in circadian control
PITA_06555	ARE	AAACCA	842	6	+	Zea mays	cis-acting regulatory element essential for the anaerobic induction
PITA_06555	ARE	AAACCA	1150	6	+	Zea mays	cis-acting regulatory element essential for the anaerobic induction
PITA_06555	ARE	AAACCA	1314	6	+	Zea mays	cis-acting regulatory element essential for the anaerobic induction
PITA_06555	AuxRR-core	GGTCCAT	136	7	-	Nicotiana tabacum	cis-acting regulatory element involved in auxin responsiveness
PITA_06555	AuxRR-core	GGTCCAT	1873	7	+	Nicotiana tabacum	cis-acting regulatory element involved in auxin responsiveness
PITA_06555	MBS	CAACTG	237	6	-	Arabidopsis thaliana	MYB binding site involved in drought-inducibility
PITA_06555	MBS	CAACTG	1517	6	+	Arabidopsis thaliana	MYB binding site involved in drought-inducibility
PITA_06555	RY-element	CATGCATG	1063	8	-	Helianthus annuus	cis-acting regulatory element involved in seed-specific regulation
PITA_06555	CCAAT-box	CAACGG	663	6	-	Hordeum vulgare	MYBHv1 binding site
PITA_06555	CAT-box	GCCACT	1234	6	-	Arabidopsis thaliana	cis-acting regulatory element related to meristem expression
PITA_06555	CAT-box	GCCACT	2013	6	+	Arabidopsis thaliana	cis-acting regulatory element related to meristem expression
PITA_06555	GCN4_motif	TGAGTCA	639	7	-	Oryza sativa	cis-regulatory element involved in endosperm expression
PITA_06713	A-box	CCGTCC	1691	6	+	Petroselinum crispum	cis-acting regulatory element
PITA_06713	GARE-motif	TCTGTTG	342	7	-	Brassica oleracea	gibberellin-responsive element
PITA_06713	MRE	AACCTAA	887	7	-	Petroselinum crispum	MYB binding site involved in light responsiveness
PITA_06713	chs-CMA1a	TTACTTAA	1133	8	+	Daucus carota	part of a light responsive element
PITA_06713	chs-CMA1a	TTACTTAA	1536	8	-	Daucus carota	part of a light responsive element
PITA_06713	TCT-motif	TCTTAC	1519	6	+	Arabidopsis thaliana	part of a light responsive element
PITA_06713	Box 4	ATTAAT	189	6	+	Petroselinum crispum	part of a conserved DNA module involved in light responsiveness
PITA_06713	G-box	CACGAC	1821	6	-	Zea mays	cis-acting regulatory element involved in light responsiveness
PITA_06713	TC-rich repeats	GTTTTCTTAC	708	9	-	Nicotiana tabacum	cis-acting element involved in defense and stress responsiveness
PITA_06713	CCAAT-box	CAACGG	1035	6	+	Hordeum vulgare	MYBHv1 binding site
PITA_06713	CAT-box	GCCACT	633	6	+	Arabidopsis thaliana	cis-acting regulatory element related to meristem expression
PITA_06713	ARE	AAACCA	110	6	-	Zea mays	cis-acting regulatory element essential for the anaerobic induction
PITA_06713	ARE	AAACCA	1665	6	+	Zea mays	cis-acting regulatory element essential for the anaerobic induction
PITA_06713	GT1-motif	GGTTAAT	1740	7	+	Avena sativa	light responsive element
PITA_06713	ATCT-motif	AATCTAATCC	480	9	-	Pisum sativum	part of a conserved DNA module involved in light responsiveness
PITA_06713	MBS	CAACTG	1113	6	-	Arabidopsis thaliana	MYB binding site involved in drought-inducibility
PITA_06713	LTR	CCGAAA	137	6	-	Hordeum vulgare	cis-acting element involved in low-temperature responsiveness
PITA_06713	LTR	CCGAAA	1790	6	-	Hordeum vulgare	cis-acting element involved in low-temperature responsiveness
PITA_06713	LTR	CCGAAA	1997	6	+	Hordeum vulgare	cis-acting element involved in low-temperature responsiveness
PITA_06934	LTR	CCGAAA	1656	6	+	Hordeum vulgare	cis-acting element involved in low-temperature responsiveness
PITA_06934	LTR	CCGAAA	1957	6	+	Hordeum vulgare	cis-acting element involved in low-temperature responsiveness
PITA_06934	CGTCA-motif	CGTCA	403	5	+	Hordeum vulgare	cis-acting regulatory element involved in the MeJA-responsiveness
PITA_06934	CGTCA-motif	CGTCA	1151	5	+	Hordeum vulgare	cis-acting regulatory element involved in the MeJA-responsiveness
PITA_06934	CGTCA-motif	CGTCA	1328	5	+	Hordeum vulgare	cis-acting regulatory element involved in the MeJA-responsiveness
PITA_06934	CGTCA-motif	CGTCA	1770	5	-	Hordeum vulgare	cis-acting regulatory element involved in the MeJA-responsiveness
PITA_06934	CGTCA-motif	CGTCA	1866	5	+	Hordeum vulgare	cis-acting regulatory element involved in the MeJA-responsiveness
PITA_06934	GCN4_motif	TGAGTCA	1882	7	+	Oryza sativa	cis-regulatory element involved in endosperm expression
PITA_06934	ARE	AAACCA	17	6	+	Zea mays	cis-acting regulatory element essential for the anaerobic induction
PITA_06934	ARE	AAACCA	65	6	+	Zea mays	cis-acting regulatory element essential for the anaerobic induction
PITA_06934	ARE	AAACCA	70	6	+	Zea mays	cis-acting regulatory element essential for the anaerobic induction
PITA_06934	ARE	AAACCA	880	6	+	Zea mays	cis-acting regulatory element essential for the anaerobic induction
PITA_06934	ARE	AAACCA	1235	6	+	Zea mays	cis-acting regulatory element essential for the anaerobic induction
PITA_06934	ARE	AAACCA	1351	6	+	Zea mays	cis-acting regulatory element essential for the anaerobic induction
PITA_06934	MBS	CAACTG	1690	6	-	Arabidopsis thaliana	MYB binding site involved in drought-inducibility
PITA_06934	G-box	CACGTC	401	6	+	Zea mays	cis-acting regulatory element involved in light responsiveness
PITA_06934	G-box	CACGAC	1911	6	+	Zea mays	cis-acting regulatory element involved in light responsiveness
PITA_06934	GA-motif	ATAGATAA	1087	8	+	Arabidopsis thaliana	part of a light responsive element
PITA_06934	TCT-motif	TCTTAC	422	6	+	Arabidopsis thaliana	part of a light responsive element
PITA_06934	TCT-motif	TCTTAC	875	6	-	Arabidopsis thaliana	part of a light responsive element
PITA_06934	A-box	CCGTCC	251	6	-	Petroselinum crispum	cis-acting regulatory element
PITA_06934	A-box	CCGTCC	1286	6	+	Petroselinum crispum	cis-acting regulatory element
PITA_06934	CAT-box	GCCACT	920	6	+	Arabidopsis thaliana	cis-acting regulatory element related to meristem expression
PITA_06934	TGACG-motif	TGACG	403	5	-	Hordeum vulgare	cis-acting regulatory element involved in the MeJA-responsiveness
PITA_06934	TGACG-motif	TGACG	1151	5	-	Hordeum vulgare	cis-acting regulatory element involved in the MeJA-responsiveness
PITA_06934	TGACG-motif	TGACG	1328	5	-	Hordeum vulgare	cis-acting regulatory element involved in the MeJA-responsiveness
PITA_06934	TGACG-motif	TGACG	1770	5	+	Hordeum vulgare	cis-acting regulatory element involved in the MeJA-responsiveness
PITA_06934	TGACG-motif	TGACG	1866	5	-	Hordeum vulgare	cis-acting regulatory element involved in the MeJA-responsiveness
PITA_06934	Box 4	ATTAAT	1063	6	-	Petroselinum crispum	part of a conserved DNA module involved in light responsiveness
PITA_06934	TC-rich repeats	ATTCTCTAAC	222	9	-	Nicotiana tabacum	cis-acting element involved in defense and stress responsiveness
PITA_06934	TC-rich repeats	GTTTTCTTAC	875	9	-	Nicotiana tabacum	cis-acting element involved in defense and stress responsiveness
PITA_06934	AE-box	AGAAACAA	1343	8	+	Arabidopsis thaliana	part of a module for light response
PITA_06934	ABRE	ACGTG	401	5	-	Arabidopsis thaliana	cis-acting element involved in the abscisic acid responsiveness
PITA_06934	ABRE	AACCCGG	1255	7	+	Arabidopsis thaliana	cis-acting element involved in the abscisic acid responsiveness
PITA_06934	TCA-element	CCATCTTTTT	859	9	-	Nicotiana tabacum	cis-acting element involved in salicylic acid responsiveness
PITA_06934	AT-rich element	ATAGAAATCAA	13	10	+	Glycine max	binding site of AT-rich DNA binding protein (ATBP-1)
PITA_06934	TGA-element	AACGAC	958	6	-	Brassica oleracea	auxin-responsive element
PITA_06934	TGA-element	AACGAC	1187	6	-	Brassica oleracea	auxin-responsive element
PITA_06985	Box 4	ATTAAT	288	6	+	Petroselinum crispum	part of a conserved DNA module involved in light responsiveness
PITA_06985	Box 4	ATTAAT	1052	6	-	Petroselinum crispum	part of a conserved DNA module involved in light responsiveness
PITA_06985	Box 4	ATTAAT	1173	6	-	Petroselinum crispum	part of a conserved DNA module involved in light responsiveness
PITA_06985	Box 4	ATTAAT	1268	6	-	Petroselinum crispum	part of a conserved DNA module involved in light responsiveness
PITA_06985	Box 4	ATTAAT	1484	6	-	Petroselinum crispum	part of a conserved DNA module involved in light responsiveness
PITA_06985	RY-element	CATGCATG	353	8	+	Helianthus annuus	cis-acting regulatory element involved in seed-specific regulation
PITA_06985	TC-rich repeats	ATTCTCTAAC	292	9	+	Nicotiana tabacum	cis-acting element involved in defense and stress responsiveness
PITA_06985	CCAAT-box	CAACGG	466	6	-	Hordeum vulgare	MYBHv1 binding site
PITA_06985	CAT-box	GCCACT	846	6	-	Arabidopsis thaliana	cis-acting regulatory element related to meristem expression
PITA_06985	TATC-box	TATCCCA	1866	7	+	Oryza sativa	cis-acting element involved in gibberellin-responsiveness
PITA_06985	MBS	CAACTG	1087	6	-	Arabidopsis thaliana	MYB binding site involved in drought-inducibility
PITA_06985	TCA-element	CCATCTTTTT	144	9	+	Nicotiana tabacum	cis-acting element involved in salicylic acid responsiveness
PITA_06985	ARE	AAACCA	39	6	+	Zea mays	cis-acting regulatory element essential for the anaerobic induction
PITA_06985	ARE	AAACCA	94	6	+	Zea mays	cis-acting regulatory element essential for the anaerobic induction
PITA_06985	ARE	AAACCA	1442	6	+	Zea mays	cis-acting regulatory element essential for the anaerobic induction
PITA_06985	GT1-motif	GGTTAAT	50	7	-	Avena sativa	light responsive element
PITA_06985	GT1-motif	GGTTAA	51	6	-	Arabidopsis thaliana	light responsive element
PITA_06985	Sp1	GGGCGG	413	6	+	Oryza sativa	light responsive element
PITA_06985	LTR	CCGAAA	991	6	+	Hordeum vulgare	cis-acting element involved in low-temperature responsiveness
PITA_06985	LTR	CCGAAA	1300	6	-	Hordeum vulgare	cis-acting element involved in low-temperature responsiveness
PITA_06985	TCCC-motif	TCTCCCT	881	7	+	Spinacia oleracea	part of a light responsive element
PITA_06985	GARE-motif	TCTGTTG	473	7	+	Brassica oleracea	gibberellin-responsive element
PITA_06985	GARE-motif	TCTGTTG	488	7	+	Brassica oleracea	gibberellin-responsive element
PITA_06985	GARE-motif	TCTGTTG	1394	7	-	Brassica oleracea	gibberellin-responsive element
PITA_06985	A-box	CCGTCC	1664	6	+	Petroselinum crispum	cis-acting regulatory element
PITA_06985	Gap-box	CAAATGAA(A/G)A	1985	9	+	Arabidopsis thaliana	part of a light responsive element
PITA_06985	TGA-element	AACGAC	372	6	-	Brassica oleracea	auxin-responsive element
PITA_06985	AE-box	AGAAACTT	1035	8	-	Arabidopsis thaliana	part of a module for light response
PITA_06985	AE-box	AGAAACAA	1507	8	+	Arabidopsis thaliana	part of a module for light response
PITA_06985	MRE	AACCTAA	53	7	+	Petroselinum crispum	MYB binding site involved in light responsiveness
PITA_06985	MRE	AACCTAA	1221	7	+	Petroselinum crispum	MYB binding site involved in light responsiveness
PITA_06985	P-box	CAACAAACCCCTT	1674	12	+	Petroselinum crispum	gibberellin-responsive element and part of a light responsive element
PITA_06992	chs-CMA2a	TCACTTGA	994	8	-	Petroselinum crispum	part of a light responsive element
PITA_06992	TCA-element	CCATCTTTTT	1068	9	-	Nicotiana tabacum	cis-acting element involved in salicylic acid responsiveness
PITA_06992	Box III	atCATTTTCACt	1106	11	+	Pisum sativum	protein binding site
PITA_06992	GT1-motif	GGTTAAT	300	7	-	Avena sativa	light responsive element
PITA_06992	GT1-motif	GGTTAA	301	6	-	Arabidopsis thaliana	light responsive element
PITA_06992	ARE	AAACCA	371	6	-	Zea mays	cis-acting regulatory element essential for the anaerobic induction
PITA_06992	CAT-box	GCCACT	65	6	+	Arabidopsis thaliana	cis-acting regulatory element related to meristem expression
PITA_06992	CAT-box	GCCACT	1512	6	+	Arabidopsis thaliana	cis-acting regulatory element related to meristem expression
PITA_06992	CAT-box	GCCACT	1665	6	+	Arabidopsis thaliana	cis-acting regulatory element related to meristem expression
PITA_06992	CAT-box	GCCACT	1817	6	+	Arabidopsis thaliana	cis-acting regulatory element related to meristem expression
PITA_06992	Box 4	ATTAAT	330	6	+	Petroselinum crispum	part of a conserved DNA module involved in light responsiveness
PITA_06992	Box 4	ATTAAT	842	6	+	Petroselinum crispum	part of a conserved DNA module involved in light responsiveness
PITA_06992	TCT-motif	TCTTAC	1374	6	+	Arabidopsis thaliana	part of a light responsive element
PITA_06992	ABRE	CGTACGTGCA	176	9	-	Hordeum vulgare	cis-acting element involved in the abscisic acid responsiveness
PITA_06992	ABRE	GCCGCGTGGC	1477	9	+	Oryza sativa	cis-acting element involved in the abscisic acid responsiveness
PITA_06992	GC-motif	CCCCCG	2011	6	+	Zea mays	enhancer-like element involved in anoxic specific inducibility
PITA_06992	AT-rich sequence	TAAAATACT	847	9	+	Pisum sativum	element for maximal elicitor-mediated activation (2copies)
PITA_06992	TCCC-motif	TCTCCCT	385	7	+	Spinacia oleracea	part of a light responsive element
PITA_07517	G-box	CACGAC	1749	6	+	Zea mays	cis-acting regulatory element involved in light responsiveness
PITA_07517	Box 4	ATTAAT	74	6	+	Petroselinum crispum	part of a conserved DNA module involved in light responsiveness
PITA_07517	Box 4	ATTAAT	147	6	+	Petroselinum crispum	part of a conserved DNA module involved in light responsiveness
PITA_07517	Box 4	ATTAAT	865	6	+	Petroselinum crispum	part of a conserved DNA module involved in light responsiveness
PITA_07517	Box 4	ATTAAT	941	6	+	Petroselinum crispum	part of a conserved DNA module involved in light responsiveness
PITA_07517	Box 4	ATTAAT	951	6	+	Petroselinum crispum	part of a conserved DNA module involved in light responsiveness
PITA_07517	Box 4	ATTAAT	1056	6	-	Petroselinum crispum	part of a conserved DNA module involved in light responsiveness
PITA_07517	GT1-motif	GGTTAA	198	6	-	Arabidopsis thaliana	light responsive element
PITA_07517	GT1-motif	GGTTAA	887	6	-	Arabidopsis thaliana	light responsive element
PITA_07517	GT1-motif	GGTTAA	1260	6	+	Arabidopsis thaliana	light responsive element
PITA_07517	GT1-motif	GGTTAA	1822	6	-	Arabidopsis thaliana	light responsive element
PITA_07517	ATCT-motif	AATCTAATCC	1218	9	-	Pisum sativum	part of a conserved DNA module involved in light responsiveness
PITA_07517	ARE	AAACCA	1123	6	-	Zea mays	cis-acting regulatory element essential for the anaerobic induction
PITA_07517	I-box	GTATAAGGCC	1684	9	+	Larix laricina	part of a light responsive element
PITA_07517	TCCC-motif	TCTCCCT	1501	7	+	Spinacia oleracea	part of a light responsive element
PITA_07517	TCCC-motif	TCTCCCT	1816	7	+	Spinacia oleracea	part of a light responsive element
PITA_07517	chs-CMA1a	TTACTTAA	261	8	+	Daucus carota	part of a light responsive element
PITA_07540	CAT-box	GCCACT	1491	6	-	Arabidopsis thaliana	cis-acting regulatory element related to meristem expression
PITA_07540	Box 4	ATTAAT	100	6	+	Petroselinum crispum	part of a conserved DNA module involved in light responsiveness
PITA_07540	Box 4	ATTAAT	319	6	+	Petroselinum crispum	part of a conserved DNA module involved in light responsiveness
PITA_07540	Box 4	ATTAAT	687	6	+	Petroselinum crispum	part of a conserved DNA module involved in light responsiveness
PITA_07540	Box II	ACACGTTGT	1682	9	+	Sinapis alba	part of a light responsive element
PITA_07540	G-Box	CACGTT	764	6	-	Pisum sativum	cis-acting regulatory element involved in light responsiveness
PITA_07540	G-Box	CACGTT	1587	6	-	Pisum sativum	cis-acting regulatory element involved in light responsiveness
PITA_07540	G-Box	CACGTT	1610	6	+	Pisum sativum	cis-acting regulatory element involved in light responsiveness
PITA_07540	G-Box	CACGTT	1634	6	+	Pisum sativum	cis-acting regulatory element involved in light responsiveness
PITA_07540	G-Box	CACGTT	1683	6	+	Pisum sativum	cis-acting regulatory element involved in light responsiveness
PITA_07540	ARE	AAACCA	174	6	-	Zea mays	cis-acting regulatory element essential for the anaerobic induction
PITA_07540	ARE	AAACCA	965	6	-	Zea mays	cis-acting regulatory element essential for the anaerobic induction
PITA_07540	ARE	AAACCA	1143	6	-	Zea mays	cis-acting regulatory element essential for the anaerobic induction
PITA_07540	GT1-motif	GGTTAA	950	6	-	Arabidopsis thaliana	light responsive element
PITA_07540	GT1-motif	GGTTAA	1195	6	+	Arabidopsis thaliana	light responsive element
PITA_07540	GT1-motif	GGTTAAT	1380	7	-	Avena sativa	light responsive element
PITA_07540	GT1-motif	GGTTAA	1381	6	-	Arabidopsis thaliana	light responsive element
PITA_07540	GARE-motif	TCTGTTG	1402	7	-	Brassica oleracea	gibberellin-responsive element
PITA_07540	AT-rich element	ATAGAAATCAA	87	10	-	Glycine max	binding site of AT-rich DNA binding protein (ATBP-1)
PITA_07540	ABRE	ACGTG	765	5	+	Arabidopsis thaliana	cis-acting element involved in the abscisic acid responsiveness
PITA_07540	ABRE	ACGTG	1588	5	+	Arabidopsis thaliana	cis-acting element involved in the abscisic acid responsiveness
PITA_07540	ABRE	ACGTG	1610	5	-	Arabidopsis thaliana	cis-acting element involved in the abscisic acid responsiveness
PITA_07540	ABRE	ACGTG	1634	5	-	Arabidopsis thaliana	cis-acting element involved in the abscisic acid responsiveness
PITA_07540	ABRE	ACGTG	1683	5	-	Arabidopsis thaliana	cis-acting element involved in the abscisic acid responsiveness
PITA_07540	AE-box	AGAAACAA	646	8	+	Arabidopsis thaliana	part of a module for light response
PITA_07540	AE-box	AGAAACAA	1502	8	+	Arabidopsis thaliana	part of a module for light response
PITA_07540	GA-motif	ATAGATAA	1010	8	-	Arabidopsis thaliana	part of a light responsive element
PITA_07979	TATC-box	TATCCCA	1765	7	+	Oryza sativa	cis-acting element involved in gibberellin-responsiveness
PITA_07979	GT1-motif	GGTTAAT	1056	7	-	Avena sativa	light responsive element
PITA_07979	GT1-motif	GGTTAA	1057	6	-	Arabidopsis thaliana	light responsive element
PITA_07979	GT1-motif	GGTTAA	1211	6	-	Arabidopsis thaliana	light responsive element
PITA_07979	MBS	CAACTG	216	6	+	Arabidopsis thaliana	MYB binding site involved in drought-inducibility
PITA_07979	MBS	CAACTG	229	6	-	Arabidopsis thaliana	MYB binding site involved in drought-inducibility
PITA_07979	MBS	CAACTG	774	6	-	Arabidopsis thaliana	MYB binding site involved in drought-inducibility
PITA_07979	MBS	CAACTG	953	6	-	Arabidopsis thaliana	MYB binding site involved in drought-inducibility
PITA_07979	MBS	CAACTG	1411	6	+	Arabidopsis thaliana	MYB binding site involved in drought-inducibility
PITA_07979	AuxRE	TGTCTCAATAAG	997	11	+	Glycine max	part of an auxin-responsive element
PITA_07979	GATA-motif	GATAGGA	1112	7	-	Arabidopsis thaliana	part of a light responsive element
PITA_07979	G-Box	CACGTT	815	6	+	Pisum sativum	cis-acting regulatory element involved in light responsiveness
PITA_07979	TGA-element	AACGAC	85	6	+	Brassica oleracea	auxin-responsive element
PITA_07979	Box II	ACACGTTGT	814	9	+	Sinapis alba	part of a light responsive element
PITA_07979	TCA-element	TCAGAAGAGG	237	9	+	Brassica oleracea	cis-acting element involved in salicylic acid responsiveness
PITA_07979	MRE	AACCTAA	492	7	-	Petroselinum crispum	MYB binding site involved in light responsiveness
PITA_07979	MRE	AACCTAA	506	7	-	Petroselinum crispum	MYB binding site involved in light responsiveness
PITA_07979	ABRE	ACGTG	815	5	-	Arabidopsis thaliana	cis-acting element involved in the abscisic acid responsiveness
PITA_07979	ATCT-motif	AATCTAATCC	638	9	+	Pisum sativum	part of a conserved DNA module involved in light responsiveness
PITA_07979	Box 4	ATTAAT	297	6	+	Petroselinum crispum	part of a conserved DNA module involved in light responsiveness
PITA_07979	Box 4	ATTAAT	1394	6	-	Petroselinum crispum	part of a conserved DNA module involved in light responsiveness
PITA_07979	A-box	CCGTCC	1563	6	+	Petroselinum crispum	cis-acting regulatory element
PITA_08577	Box 4	ATTAAT	330	6	+	Petroselinum crispum	part of a conserved DNA module involved in light responsiveness
PITA_08577	Box 4	ATTAAT	871	6	+	Petroselinum crispum	part of a conserved DNA module involved in light responsiveness
PITA_08577	TCT-motif	TCTTAC	164	6	+	Arabidopsis thaliana	part of a light responsive element
PITA_08577	TCT-motif	TCTTAC	1071	6	-	Arabidopsis thaliana	part of a light responsive element
PITA_08577	G-box	CACGTC	1619	6	+	Zea mays	cis-acting regulatory element involved in light responsiveness
PITA_08577	TATC-box	TATCCCA	678	7	+	Oryza sativa	cis-acting element involved in gibberellin-responsiveness
PITA_08577	MBS	CAACTG	1648	6	+	Arabidopsis thaliana	MYB binding site involved in drought-inducibility
PITA_08577	ARE	AAACCA	1036	6	+	Zea mays	cis-acting regulatory element essential for the anaerobic induction
PITA_08577	ARE	AAACCA	1982	6	-	Zea mays	cis-acting regulatory element essential for the anaerobic induction
PITA_08577	GT1-motif	GGTTAA	1953	6	+	Arabidopsis thaliana	light responsive element
PITA_08577	GATA-motif	AAGGATAAGG	1012	9	-	Solanum tuberosum	part of a light responsive element
PITA_08577	GATA-motif	AAGGATAAGG	1247	9	-	Solanum tuberosum	part of a light responsive element
PITA_08577	Sp1	GGGCGG	942	6	+	Oryza sativa	light responsive element
PITA_08577	I-box	AGATAAGG	1247	8	-	Triticum aestivum	part of a light responsive element
PITA_08577	GARE-motif	TCTGTTG	842	7	+	Brassica oleracea	gibberellin-responsive element
PITA_08577	AT1-motif	AATTATTTTTTATT	122	14	+	Solanum tuberosum	part of a light responsive module
PITA_08577	P-box	CCTTTTG	1851	7	+	Oryza sativa	gibberellin-responsive element
PITA_08577	CGTCA-motif	CGTCA	80	5	+	Hordeum vulgare	cis-acting regulatory element involved in the MeJA-responsiveness
PITA_08577	HD-Zip 3	GTAAT(G/C)ATTAC	1829	9.5	-	Arabidopsis thaliana	protein binding site
PITA_08577	TGACG-motif	TGACG	80	5	-	Hordeum vulgare	cis-acting regulatory element involved in the MeJA-responsiveness
PITA_08577	chs-CMA1a	TTACTTAA	115	8	-	Daucus carota	part of a light responsive element
PITA_08577	ABRE	ACGTG	1619	5	-	Arabidopsis thaliana	cis-acting element involved in the abscisic acid responsiveness
PITA_08629	Box 4	ATTAAT	370	6	+	Petroselinum crispum	part of a conserved DNA module involved in light responsiveness
PITA_08629	Box 4	ATTAAT	459	6	+	Petroselinum crispum	part of a conserved DNA module involved in light responsiveness
PITA_08629	Box 4	ATTAAT	564	6	+	Petroselinum crispum	part of a conserved DNA module involved in light responsiveness
PITA_08629	Box 4	ATTAAT	682	6	+	Petroselinum crispum	part of a conserved DNA module involved in light responsiveness
PITA_08629	Box 4	ATTAAT	791	6	+	Petroselinum crispum	part of a conserved DNA module involved in light responsiveness
PITA_08629	Box 4	ATTAAT	818	6	+	Petroselinum crispum	part of a conserved DNA module involved in light responsiveness
PITA_08629	Box 4	ATTAAT	841	6	+	Petroselinum crispum	part of a conserved DNA module involved in light responsiveness
PITA_08629	Box 4	ATTAAT	1272	6	-	Petroselinum crispum	part of a conserved DNA module involved in light responsiveness
PITA_08629	TCT-motif	TCTTAC	220	6	-	Arabidopsis thaliana	part of a light responsive element
PITA_08629	G-box	TACGTG	957	6	+	Arabidopsis thaliana	cis-acting regulatory element involved in light responsiveness
PITA_08629	TC-rich repeats	ATTCTCTAAC	1114	9	+	Nicotiana tabacum	cis-acting element involved in defense and stress responsiveness
PITA_08629	TCA-element	CCATCTTTTT	847	9	-	Nicotiana tabacum	cis-acting element involved in salicylic acid responsiveness
PITA_08629	GT1-motif	GGTTAA	21	6	-	Arabidopsis thaliana	light responsive element
PITA_08629	circadian	CAAAGATATC	79	9	+	Lycopersicon esculentum	cis-acting regulatory element involved in circadian control
PITA_08629	GATA-motif	GATAGGA	121	7	+	Arabidopsis thaliana	part of a light responsive element
PITA_08629	GARE-motif	TCTGTTG	1632	7	+	Brassica oleracea	gibberellin-responsive element
PITA_08629	A-box	CCGTCC	1700	6	+	Petroselinum crispum	cis-acting regulatory element
PITA_08629	AT1-motif	AATTATTTTTTATT	681	13	+	Solanum tuberosum	part of a light responsive module
PITA_08629	3-AF1 binding site	TAAGAGAGGAA	118	10	+	Solanum tuberosum	light responsive element
PITA_08629	3-AF1 binding site	TAAGAGAGGAA	901	10	+	Solanum tuberosum	light responsive element
PITA_08629	TGACG-motif	TGACG	91	5	+	Hordeum vulgare	cis-acting regulatory element involved in the MeJA-responsiveness
PITA_08629	TGACG-motif	TGACG	1223	5	+	Hordeum vulgare	cis-acting regulatory element involved in the MeJA-responsiveness
PITA_08629	TGACG-motif	TGACG	1546	5	+	Hordeum vulgare	cis-acting regulatory element involved in the MeJA-responsiveness
PITA_08629	TGACG-motif	TGACG	1958	5	-	Hordeum vulgare	cis-acting regulatory element involved in the MeJA-responsiveness
PITA_08629	ABRE	ACGTG	958	5	+	Arabidopsis thaliana	cis-acting element involved in the abscisic acid responsiveness
PITA_08629	CGTCA-motif	CGTCA	91	5	-	Hordeum vulgare	cis-acting regulatory element involved in the MeJA-responsiveness
PITA_08629	CGTCA-motif	CGTCA	1223	5	-	Hordeum vulgare	cis-acting regulatory element involved in the MeJA-responsiveness
PITA_08629	CGTCA-motif	CGTCA	1546	5	-	Hordeum vulgare	cis-acting regulatory element involved in the MeJA-responsiveness
PITA_08629	CGTCA-motif	CGTCA	1958	5	+	Hordeum vulgare	cis-acting regulatory element involved in the MeJA-responsiveness
PITA_08733	MBS	CAACTG	1532	6	-	Arabidopsis thaliana	MYB binding site involved in drought-inducibility
PITA_08733	MBS	CAACTG	1997	6	+	Arabidopsis thaliana	MYB binding site involved in drought-inducibility
PITA_08733	Sp1	GGGCGG	1893	6	+	Oryza sativa	light responsive element
PITA_08733	TATC-box	TATCCCA	54	7	-	Oryza sativa	cis-acting element involved in gibberellin-responsiveness
PITA_08733	ARE	AAACCA	397	6	+	Zea mays	cis-acting regulatory element essential for the anaerobic induction
PITA_08733	ARE	AAACCA	448	6	+	Zea mays	cis-acting regulatory element essential for the anaerobic induction
PITA_08733	ARE	AAACCA	1244	6	+	Zea mays	cis-acting regulatory element essential for the anaerobic induction
PITA_08733	ARE	AAACCA	1395	6	-	Zea mays	cis-acting regulatory element essential for the anaerobic induction
PITA_08733	ARE	AAACCA	1428	6	-	Zea mays	cis-acting regulatory element essential for the anaerobic induction
PITA_08733	ARE	AAACCA	1446	6	-	Zea mays	cis-acting regulatory element essential for the anaerobic induction
PITA_08733	ARE	AAACCA	1692	6	+	Zea mays	cis-acting regulatory element essential for the anaerobic induction
PITA_08733	CAT-box	GCCACT	697	6	-	Arabidopsis thaliana	cis-acting regulatory element related to meristem expression
PITA_08733	CGTCA-motif	CGTCA	86	5	+	Hordeum vulgare	cis-acting regulatory element involved in the MeJA-responsiveness
PITA_08733	CGTCA-motif	CGTCA	198	5	+	Hordeum vulgare	cis-acting regulatory element involved in the MeJA-responsiveness
PITA_08733	CGTCA-motif	CGTCA	1276	5	+	Hordeum vulgare	cis-acting regulatory element involved in the MeJA-responsiveness
PITA_08733	CGTCA-motif	CGTCA	1748	5	+	Hordeum vulgare	cis-acting regulatory element involved in the MeJA-responsiveness
PITA_08733	CGTCA-motif	CGTCA	1848	5	+	Hordeum vulgare	cis-acting regulatory element involved in the MeJA-responsiveness
PITA_08733	AE-box	AGAAACAA	950	8	-	Arabidopsis thaliana	part of a module for light response
PITA_08733	TGACG-motif	TGACG	86	5	-	Hordeum vulgare	cis-acting regulatory element involved in the MeJA-responsiveness
PITA_08733	TGACG-motif	TGACG	198	5	-	Hordeum vulgare	cis-acting regulatory element involved in the MeJA-responsiveness
PITA_08733	TGACG-motif	TGACG	1276	5	-	Hordeum vulgare	cis-acting regulatory element involved in the MeJA-responsiveness
PITA_08733	TGACG-motif	TGACG	1748	5	-	Hordeum vulgare	cis-acting regulatory element involved in the MeJA-responsiveness
PITA_08733	TGACG-motif	TGACG	1848	5	-	Hordeum vulgare	cis-acting regulatory element involved in the MeJA-responsiveness
PITA_08733	Box 4	ATTAAT	484	6	+	Petroselinum crispum	part of a conserved DNA module involved in light responsiveness
PITA_08733	Box 4	ATTAAT	646	6	+	Petroselinum crispum	part of a conserved DNA module involved in light responsiveness
PITA_08733	Box 4	ATTAAT	1078	6	-	Petroselinum crispum	part of a conserved DNA module involved in light responsiveness
PITA_08733	Box 4	ATTAAT	1144	6	-	Petroselinum crispum	part of a conserved DNA module involved in light responsiveness
PITA_08733	Box 4	ATTAAT	1184	6	-	Petroselinum crispum	part of a conserved DNA module involved in light responsiveness
PITA_08733	Box 4	ATTAAT	1457	6	-	Petroselinum crispum	part of a conserved DNA module involved in light responsiveness
PITA_08733	Box 4	ATTAAT	1833	6	-	Petroselinum crispum	part of a conserved DNA module involved in light responsiveness
PITA_08733	GCN4_motif	TGAGTCA	1937	7	-	Oryza sativa	cis-regulatory element involved in endosperm expression
PITA_08733	AT-rich element	ATAGAAATCAA	917	10	+	Glycine max	binding site of AT-rich DNA binding protein (ATBP-1)
PITA_08733	AT-rich element	ATAGAAATCAA	1465	10	+	Glycine max	binding site of AT-rich DNA binding protein (ATBP-1)
PITA_08733	GT1-motif	GGTTAA	990	6	-	Arabidopsis thaliana	light responsive element
PITA_08733	GT1-motif	GGTTAA	1721	6	-	Arabidopsis thaliana	light responsive element
PITA_08829	ARE	AAACCA	59	6	-	Zea mays	cis-acting regulatory element essential for the anaerobic induction
PITA_08829	ARE	AAACCA	351	6	+	Zea mays	cis-acting regulatory element essential for the anaerobic induction
PITA_08829	ARE	AAACCA	713	6	-	Zea mays	cis-acting regulatory element essential for the anaerobic induction
PITA_08829	GC-motif	CCCCCG	286	6	-	Zea mays	enhancer-like element involved in anoxic specific inducibility
PITA_08829	TATC-box	TATCCCA	806	7	-	Oryza sativa	cis-acting element involved in gibberellin-responsiveness
PITA_08829	TATC-box	TATCCCA	1084	7	-	Oryza sativa	cis-acting element involved in gibberellin-responsiveness
PITA_08829	MBS	CAACTG	1703	6	+	Arabidopsis thaliana	MYB binding site involved in drought-inducibility
PITA_08829	Sp1	GGGCGG	1905	6	-	Oryza sativa	light responsive element
PITA_08829	GA-motif	ATAGATAA	1316	8	-	Arabidopsis thaliana	part of a light responsive element
PITA_08829	P-box	CCTTTTG	1525	7	+	Oryza sativa	gibberellin-responsive element
PITA_08829	chs-CMA2a	TCACTTGA	1692	8	-	Petroselinum crispum	part of a light responsive element
PITA_08829	G-box	CACGAC	1752	6	+	Zea mays	cis-acting regulatory element involved in light responsiveness
PITA_08829	LTR	CCGAAA	283	6	-	Hordeum vulgare	cis-acting element involved in low-temperature responsiveness
PITA_08829	ACE	CTAACGTATT	1385	9	+	Petroselinum crispum	cis-acting element involved in light responsiveness
PITA_08829	I-box	gGATAAGGTG	808	9	+	Zea mays	part of a light responsive element
PITA_08829	GT1-motif	GGTTAA	1205	6	-	Arabidopsis thaliana	light responsive element
PITA_08829	O2-site	GATGATGTGG	1410	9	-	Zea mays	cis-acting regulatory element involved in zein metabolism regulation
PITA_08829	TCT-motif	TCTTAC	675	6	-	Arabidopsis thaliana	part of a light responsive element
PITA_08829	TCT-motif	TCTTAC	1399	6	+	Arabidopsis thaliana	part of a light responsive element
PITA_08829	GARE-motif	TCTGTTG	917	7	+	Brassica oleracea	gibberellin-responsive element
PITA_09250	AT-rich element	ATAGAAATCAA	1853	10	+	Glycine max	binding site of AT-rich DNA binding protein (ATBP-1)
PITA_09250	TCA-element	CCATCTTTTT	1137	9	+	Nicotiana tabacum	cis-acting element involved in salicylic acid responsiveness
PITA_09250	TCA-element	CCATCTTTTT	1963	9	+	Nicotiana tabacum	cis-acting element involved in salicylic acid responsiveness
PITA_09250	chs-CMA1a	TTACTTAA	1221	8	+	Daucus carota	part of a light responsive element
PITA_09250	TCT-motif	TCTTAC	536	6	-	Arabidopsis thaliana	part of a light responsive element
PITA_09250	TCT-motif	TCTTAC	616	6	-	Arabidopsis thaliana	part of a light responsive element
PITA_09250	TCT-motif	TCTTAC	677	6	-	Arabidopsis thaliana	part of a light responsive element
PITA_09250	GA-motif	ATAGATAA	146	8	-	Arabidopsis thaliana	part of a light responsive element
PITA_09250	GATA-motif	GATAGGG	1044	7	+	Pisum sativum	part of a light responsive element
PITA_09250	ABRE	CGTACGTGCA	1720	9	-	Hordeum vulgare	cis-acting element involved in the abscisic acid responsiveness
PITA_09250	ARE	AAACCA	330	6	-	Zea mays	cis-acting regulatory element essential for the anaerobic induction
PITA_09250	ARE	AAACCA	785	6	-	Zea mays	cis-acting regulatory element essential for the anaerobic induction
PITA_09250	ARE	AAACCA	1991	6	-	Zea mays	cis-acting regulatory element essential for the anaerobic induction
PITA_09250	TATC-box	TATCCCA	729	7	+	Oryza sativa	cis-acting element involved in gibberellin-responsiveness
PITA_09250	GC-motif	CCCCCG	1909	6	+	Zea mays	enhancer-like element involved in anoxic specific inducibility
PITA_09250	CAT-box	GCCACT	368	6	+	Arabidopsis thaliana	cis-acting regulatory element related to meristem expression
PITA_09250	Box 4	ATTAAT	71	6	+	Petroselinum crispum	part of a conserved DNA module involved in light responsiveness
PITA_09250	Box 4	ATTAAT	99	6	+	Petroselinum crispum	part of a conserved DNA module involved in light responsiveness
PITA_09250	Box 4	ATTAAT	1175	6	-	Petroselinum crispum	part of a conserved DNA module involved in light responsiveness
PITA_09250	Box 4	ATTAAT	1315	6	-	Petroselinum crispum	part of a conserved DNA module involved in light responsiveness
PITA_09250	Box 4	ATTAAT	1342	6	-	Petroselinum crispum	part of a conserved DNA module involved in light responsiveness
PITA_09315	AuxRE	TGTCTCAATAAG	997	11	+	Glycine max	part of an auxin-responsive element
PITA_09315	GATA-motif	GATAGGA	1112	7	-	Arabidopsis thaliana	part of a light responsive element
PITA_09315	GT1-motif	GGTTAAT	1056	7	-	Avena sativa	light responsive element
PITA_09315	GT1-motif	GGTTAA	1057	6	-	Arabidopsis thaliana	light responsive element
PITA_09315	GT1-motif	GGTTAA	1211	6	-	Arabidopsis thaliana	light responsive element
PITA_09315	MBS	CAACTG	181	6	+	Arabidopsis thaliana	MYB binding site involved in drought-inducibility
PITA_09315	MBS	CAACTG	194	6	-	Arabidopsis thaliana	MYB binding site involved in drought-inducibility
PITA_09315	MBS	CAACTG	739	6	-	Arabidopsis thaliana	MYB binding site involved in drought-inducibility
PITA_09315	MBS	CAACTG	918	6	-	Arabidopsis thaliana	MYB binding site involved in drought-inducibility
PITA_09315	MBS	CAACTG	953	6	-	Arabidopsis thaliana	MYB binding site involved in drought-inducibility
PITA_09315	MBS	CAACTG	1411	6	+	Arabidopsis thaliana	MYB binding site involved in drought-inducibility
PITA_09315	TATC-box	TATCCCA	1765	7	+	Oryza sativa	cis-acting element involved in gibberellin-responsiveness
PITA_09315	Box 4	ATTAAT	262	6	+	Petroselinum crispum	part of a conserved DNA module involved in light responsiveness
PITA_09315	Box 4	ATTAAT	1394	6	-	Petroselinum crispum	part of a conserved DNA module involved in light responsiveness
PITA_09315	A-box	CCGTCC	1563	6	+	Petroselinum crispum	cis-acting regulatory element
PITA_09315	ATCT-motif	AATCTAATCC	603	9	+	Pisum sativum	part of a conserved DNA module involved in light responsiveness
PITA_09315	ABRE	ACGTG	780	5	-	Arabidopsis thaliana	cis-acting element involved in the abscisic acid responsiveness
PITA_09315	MRE	AACCTAA	457	7	-	Petroselinum crispum	MYB binding site involved in light responsiveness
PITA_09315	MRE	AACCTAA	471	7	-	Petroselinum crispum	MYB binding site involved in light responsiveness
PITA_09315	TGA-element	AACGAC	50	6	+	Brassica oleracea	auxin-responsive element
PITA_09315	G-Box	CACGTT	780	6	+	Pisum sativum	cis-acting regulatory element involved in light responsiveness
PITA_09315	Box II	ACACGTTGT	779	9	+	Sinapis alba	part of a light responsive element
PITA_09315	TCA-element	TCAGAAGAGG	202	9	+	Brassica oleracea	cis-acting element involved in salicylic acid responsiveness
PITA_09364	WUN-motif	AAATTTCCT	417	9	-	Brassica oleracea	wound-responsive element
PITA_09364	AT-rich element	ATAGAAATCAA	97	10	-	Glycine max	binding site of AT-rich DNA binding protein (ATBP-1)
PITA_09364	AT-rich element	ATAGAAATCAA	145	10	+	Glycine max	binding site of AT-rich DNA binding protein (ATBP-1)
PITA_09364	AT-rich element	ATAGAAATCAA	1853	10	+	Glycine max	binding site of AT-rich DNA binding protein (ATBP-1)
PITA_09364	HD-Zip 3	GTAAT(G/C)ATTAC	294	9.5	+	Arabidopsis thaliana	protein binding site
PITA_09364	TCA-element	CCATCTTTTT	1963	9	+	Nicotiana tabacum	cis-acting element involved in salicylic acid responsiveness
PITA_09364	GT1-motif	GGTTAA	80	6	-	Arabidopsis thaliana	light responsive element
PITA_09364	GT1-motif	GGTTAA	120	6	+	Arabidopsis thaliana	light responsive element
PITA_09364	GT1-motif	GGTTAA	523	6	+	Arabidopsis thaliana	light responsive element
PITA_09364	GATA-motif	GATAGGG	1002	7	+	Pisum sativum	part of a light responsive element
PITA_09364	ABRE	CGTACGTGCA	1719	9	-	Hordeum vulgare	cis-acting element involved in the abscisic acid responsiveness
PITA_09364	MBS	CAACTG	261	6	+	Arabidopsis thaliana	MYB binding site involved in drought-inducibility
PITA_09364	MBS	CAACTG	447	6	-	Arabidopsis thaliana	MYB binding site involved in drought-inducibility
PITA_09364	ARE	AAACCA	743	6	-	Zea mays	cis-acting regulatory element essential for the anaerobic induction
PITA_09364	ARE	AAACCA	1991	6	-	Zea mays	cis-acting regulatory element essential for the anaerobic induction
PITA_09364	GC-motif	CCCCCG	1909	6	+	Zea mays	enhancer-like element involved in anoxic specific inducibility
PITA_09364	TATC-box	TATCCCA	687	7	+	Oryza sativa	cis-acting element involved in gibberellin-responsiveness
PITA_09364	LAMP-element	CTTTATCA	551	8	+	Pisum sativum	part of a light responsive element
PITA_09364	Box 4	ATTAAT	1133	6	-	Petroselinum crispum	part of a conserved DNA module involved in light responsiveness
PITA_09364	Box 4	ATTAAT	1314	6	-	Petroselinum crispum	part of a conserved DNA module involved in light responsiveness
PITA_09364	Box 4	ATTAAT	1341	6	-	Petroselinum crispum	part of a conserved DNA module involved in light responsiveness
PITA_09926	GT1-motif	GGTTAA	517	6	-	Arabidopsis thaliana	light responsive element
PITA_09926	GT1-motif	GGTTAA	820	6	-	Arabidopsis thaliana	light responsive element
PITA_09926	GT1-motif	GGTTAA	1978	6	+	Arabidopsis thaliana	light responsive element
PITA_09926	O2-site	GATGACATGG	476	9	+	Zea mays	cis-acting regulatory element involved in zein metabolism regulation
PITA_09926	ARE	AAACCA	67	6	+	Zea mays	cis-acting regulatory element essential for the anaerobic induction
PITA_09926	ARE	AAACCA	442	6	+	Zea mays	cis-acting regulatory element essential for the anaerobic induction
PITA_09926	ARE	AAACCA	1028	6	+	Zea mays	cis-acting regulatory element essential for the anaerobic induction
PITA_09926	ARE	AAACCA	1238	6	+	Zea mays	cis-acting regulatory element essential for the anaerobic induction
PITA_09926	ARE	AAACCA	1778	6	+	Zea mays	cis-acting regulatory element essential for the anaerobic induction
PITA_09926	ABRE	ACGTG	1772	5	-	Arabidopsis thaliana	cis-acting element involved in the abscisic acid responsiveness
PITA_09926	CCAAT-box	CAACGG	1834	6	+	Hordeum vulgare	MYBHv1 binding site
PITA_09926	GATA-motif	GATAGGG	470	7	+	Pisum sativum	part of a light responsive element
PITA_09926	GATA-motif	GATAGGA	752	7	-	Arabidopsis thaliana	part of a light responsive element
PITA_09926	GATA-motif	AAGGATAAGG	885	9	+	Solanum tuberosum	part of a light responsive element
PITA_09926	AT1-motif	AATTATTTTTTATT	760	13	-	Solanum tuberosum	part of a light responsive module
PITA_09926	G-Box	CACGTT	1772	6	+	Pisum sativum	cis-acting regulatory element involved in light responsiveness
PITA_09926	Box 4	ATTAAT	979	6	+	Petroselinum crispum	part of a conserved DNA module involved in light responsiveness
PITA_09926	Box 4	ATTAAT	992	6	+	Petroselinum crispum	part of a conserved DNA module involved in light responsiveness
PITA_09926	Box 4	ATTAAT	1000	6	+	Petroselinum crispum	part of a conserved DNA module involved in light responsiveness
PITA_09926	Box 4	ATTAAT	1103	6	-	Petroselinum crispum	part of a conserved DNA module involved in light responsiveness
PITA_09926	Box 4	ATTAAT	1326	6	-	Petroselinum crispum	part of a conserved DNA module involved in light responsiveness
PITA_09926	Box 4	ATTAAT	1332	6	-	Petroselinum crispum	part of a conserved DNA module involved in light responsiveness
PITA_09926	Box 4	ATTAAT	1502	6	-	Petroselinum crispum	part of a conserved DNA module involved in light responsiveness
PITA_09926	Box 4	ATTAAT	1538	6	-	Petroselinum crispum	part of a conserved DNA module involved in light responsiveness
PITA_09926	Box 4	ATTAAT	1572	6	-	Petroselinum crispum	part of a conserved DNA module involved in light responsiveness
PITA_09926	Box 4	ATTAAT	1588	6	-	Petroselinum crispum	part of a conserved DNA module involved in light responsiveness
PITA_10070	CAT-box	GCCACT	1116	6	+	Arabidopsis thaliana	cis-acting regulatory element related to meristem expression
PITA_10070	CAT-box	GCCACT	1596	6	+	Arabidopsis thaliana	cis-acting regulatory element related to meristem expression
PITA_10070	ARE	AAACCA	131	6	+	Zea mays	cis-acting regulatory element essential for the anaerobic induction
PITA_10070	ARE	AAACCA	945	6	+	Zea mays	cis-acting regulatory element essential for the anaerobic induction
PITA_10070	ARE	AAACCA	1077	6	+	Zea mays	cis-acting regulatory element essential for the anaerobic induction
PITA_10070	TATC-box	TATCCCA	287	7	+	Oryza sativa	cis-acting element involved in gibberellin-responsiveness
PITA_10070	GC-motif	CCCCCG	1007	6	+	Zea mays	enhancer-like element involved in anoxic specific inducibility
PITA_10070	CCAAT-box	CAACGG	1806	6	-	Hordeum vulgare	MYBHv1 binding site
PITA_10070	ABRE	ACGTG	174	5	-	Arabidopsis thaliana	cis-acting element involved in the abscisic acid responsiveness
PITA_10070	ABRE	ACGTG	888	5	-	Arabidopsis thaliana	cis-acting element involved in the abscisic acid responsiveness
PITA_10070	ABRE	ACGTG	952	5	-	Arabidopsis thaliana	cis-acting element involved in the abscisic acid responsiveness
PITA_10070	MBS	CAACTG	1172	6	+	Arabidopsis thaliana	MYB binding site involved in drought-inducibility
PITA_10070	P-box	CCTTTTG	1019	7	-	Oryza sativa	gibberellin-responsive element
PITA_10070	G-box	ACACGTG(G/t)CACC	96	10.5	+	Lycopersicon esculentum	cis-acting regulatory element involved in light responsiveness
PITA_10070	G-box	CACGAC	398	6	-	Zea mays	cis-acting regulatory element involved in light responsiveness
PITA_10070	G-box	TACGTG	888	6	-	Arabidopsis thaliana	cis-acting regulatory element involved in light responsiveness
PITA_10070	G-box	CACGTC	952	6	+	Zea mays	cis-acting regulatory element involved in light responsiveness
PITA_10070	Box 4	ATTAAT	603	6	+	Petroselinum crispum	part of a conserved DNA module involved in light responsiveness
PITA_10070	Box 4	ATTAAT	719	6	+	Petroselinum crispum	part of a conserved DNA module involved in light responsiveness
PITA_10070	circadian	CAAAGATATC	1582	9	+	Lycopersicon esculentum	cis-acting regulatory element involved in circadian control
PITA_10070	circadian	CAAAGATATC	1586	9	-	Lycopersicon esculentum	cis-acting regulatory element involved in circadian control
PITA_10070	G-Box	CACGTT	174	6	+	Pisum sativum	cis-acting regulatory element involved in light responsiveness
PITA_10070	TCCC-motif	TCTCCCT	1674	7	+	Spinacia oleracea	part of a light responsive element
PITA_10070	MRE	AACCTAA	938	7	+	Petroselinum crispum	MYB binding site involved in light responsiveness
PITA_10070	GT1-motif	GGTTAAT	1848	7	-	Avena sativa	light responsive element
PITA_10070	GT1-motif	GGTTAA	1849	6	-	Arabidopsis thaliana	light responsive element
PITA_10070	GT1-motif	GGTTAAT	2004	7	+	Avena sativa	light responsive element
PITA_10070	O2-site	GATGACATGG	1132	9	+	Zea mays	cis-acting regulatory element involved in zein metabolism regulation
PITA_10070	TCT-motif	TCTTAC	249	6	+	Arabidopsis thaliana	part of a light responsive element
PITA_10070	TCT-motif	TCTTAC	767	6	+	Arabidopsis thaliana	part of a light responsive element
PITA_10070	MBSI	TTTTTACGGTTA	550	11	+	Petunia hybrida	MYB binding site involved in flavonoid biosynthetic genes regulation
PITA_10070	TCA-element	CCATCTTTTT	859	9	-	Nicotiana tabacum	cis-acting element involved in salicylic acid responsiveness
PITA_10393	GCN4_motif	TGAGTCA	592	7	-	Oryza sativa	cis-regulatory element involved in endosperm expression
PITA_10393	3-AF1 binding site	TAAGAGAGGAA	321	10	+	Solanum tuberosum	light responsive element
PITA_10393	3-AF1 binding site	TAAGAGAGGAA	475	10	-	Solanum tuberosum	light responsive element
PITA_10393	GT1-motif	GGTTAA	1225	6	-	Arabidopsis thaliana	light responsive element
PITA_10393	TCT-motif	TCTTAC	842	6	-	Arabidopsis thaliana	part of a light responsive element
PITA_10393	TCT-motif	TCTTAC	914	6	-	Arabidopsis thaliana	part of a light responsive element
PITA_10393	GARE-motif	TCTGTTG	1685	7	+	Brassica oleracea	gibberellin-responsive element
PITA_10393	ARE	AAACCA	1296	6	-	Zea mays	cis-acting regulatory element essential for the anaerobic induction
PITA_10393	ABRE	CACGTG	649	6	+	Arabidopsis thaliana	cis-acting element involved in the abscisic acid responsiveness
PITA_10393	ABRE	ACGTG	650	5	+	Arabidopsis thaliana	cis-acting element involved in the abscisic acid responsiveness
PITA_10393	ABRE	ACGTG	911	5	-	Arabidopsis thaliana	cis-acting element involved in the abscisic acid responsiveness
PITA_10393	ABRE	ACGTG	1060	5	-	Arabidopsis thaliana	cis-acting element involved in the abscisic acid responsiveness
PITA_10393	ABRE	ACGTG	1161	5	-	Arabidopsis thaliana	cis-acting element involved in the abscisic acid responsiveness
PITA_10393	ABRE	AACCCGG	1480	7	-	Arabidopsis thaliana	cis-acting element involved in the abscisic acid responsiveness
PITA_10393	CCAAT-box	CAACGG	1336	6	-	Hordeum vulgare	MYBHv1 binding site
PITA_10393	MBS	CAACTG	1723	6	-	Arabidopsis thaliana	MYB binding site involved in drought-inducibility
PITA_10393	GATA-motif	GATAGGG	340	7	+	Pisum sativum	part of a light responsive element
PITA_10393	GA-motif	ATAGATAA	1489	8	+	Arabidopsis thaliana	part of a light responsive element
PITA_10393	CGTCA-motif	CGTCA	170	5	-	Hordeum vulgare	cis-acting regulatory element involved in the MeJA-responsiveness
PITA_10393	CGTCA-motif	CGTCA	604	5	-	Hordeum vulgare	cis-acting regulatory element involved in the MeJA-responsiveness
PITA_10393	CGTCA-motif	CGTCA	1395	5	-	Hordeum vulgare	cis-acting regulatory element involved in the MeJA-responsiveness
PITA_10393	ATCT-motif	AATCTAATCC	538	9	+	Pisum sativum	part of a conserved DNA module involved in light responsiveness
PITA_10393	ATCT-motif	AATCTAATCC	822	9	+	Pisum sativum	part of a conserved DNA module involved in light responsiveness
PITA_10393	TGA-element	AACGAC	1364	6	+	Brassica oleracea	auxin-responsive element
PITA_10393	TGA-element	AACGAC	1513	6	-	Brassica oleracea	auxin-responsive element
PITA_10393	G-box	ACACGTGT	648	8	+	Brassica napus	cis-acting regulatory element involved in light responsiveness
PITA_10393	G-box	CACGTG	649	6	+	Arabidopsis thaliana	cis-acting regulatory element involved in light responsiveness
PITA_10393	G-box	TACGTG	911	6	-	Arabidopsis thaliana	cis-acting regulatory element involved in light responsiveness
PITA_10393	G-box	CACGTC	1060	6	+	Zea mays	cis-acting regulatory element involved in light responsiveness
PITA_10393	G-box	TACGTG	1161	6	-	Arabidopsis thaliana	cis-acting regulatory element involved in light responsiveness
PITA_10393	G-box	CACGAC	1466	6	+	Zea mays	cis-acting regulatory element involved in light responsiveness
PITA_10393	circadian	CAAAGATATC	570	9	-	Lycopersicon esculentum	cis-acting regulatory element involved in circadian control
PITA_10393	TGACG-motif	TGACG	170	5	+	Hordeum vulgare	cis-acting regulatory element involved in the MeJA-responsiveness
PITA_10393	TGACG-motif	TGACG	604	5	+	Hordeum vulgare	cis-acting regulatory element involved in the MeJA-responsiveness
PITA_10393	TGACG-motif	TGACG	1395	5	+	Hordeum vulgare	cis-acting regulatory element involved in the MeJA-responsiveness
PITA_10393	G-Box	CACGTG	649	6	+	Pisum sativum	cis-acting regulatory element involved in light responsiveness
PITA_10423	ARE	AAACCA	1973	6	-	Zea mays	cis-acting regulatory element essential for the anaerobic induction
PITA_10423	AT-rich element	ATAGAAATCAA	1828	10	+	Glycine max	binding site of AT-rich DNA binding protein (ATBP-1)
PITA_10423	GC-motif	CCCCCG	1891	6	+	Zea mays	enhancer-like element involved in anoxic specific inducibility
PITA_10671	GT1-motif	GGTTAAT	1208	7	+	Avena sativa	light responsive element
PITA_10671	TCT-motif	TCTTAC	1535	6	+	Arabidopsis thaliana	part of a light responsive element
PITA_10671	chs-CMA1a	TTACTTAA	996	8	+	Daucus carota	part of a light responsive element
PITA_10671	MSA-like	TCCAACGGT	381	9	-	Catharanthus roseus	cis-acting element involved in cell cycle regulation
PITA_10671	3-AF1 binding site	TAAGAGAGGAA	79	10	+	Solanum tuberosum	light responsive element
PITA_10671	GCN4_motif	TGAGTCA	1747	7	+	Oryza sativa	cis-regulatory element involved in endosperm expression
PITA_10671	I-box	gGATAAGGTG	1517	9	+	Zea mays	part of a light responsive element
PITA_10671	AuxRR-core	GGTCCAT	1336	7	+	Nicotiana tabacum	cis-acting regulatory element involved in auxin responsiveness
PITA_10671	Box 4	ATTAAT	1114	6	-	Petroselinum crispum	part of a conserved DNA module involved in light responsiveness
PITA_10671	ACE	GACACGTATG	464	9	+	Petroselinum crispum	cis-acting element involved in light responsiveness
PITA_10671	TGACG-motif	TGACG	1097	5	+	Hordeum vulgare	cis-acting regulatory element involved in the MeJA-responsiveness
PITA_10671	LTR	CCGAAA	462	6	+	Hordeum vulgare	cis-acting element involved in low-temperature responsiveness
PITA_10671	LTR	CCGAAA	1946	6	+	Hordeum vulgare	cis-acting element involved in low-temperature responsiveness
PITA_10671	TCCC-motif	TCTCCCT	1159	7	-	Spinacia oleracea	part of a light responsive element
PITA_10671	MRE	AACCTAA	274	7	+	Petroselinum crispum	MYB binding site involved in light responsiveness
PITA_10671	TC-rich repeats	GTTTTCTTAC	267	9	-	Nicotiana tabacum	cis-acting element involved in defense and stress responsiveness
PITA_10671	ARE	AAACCA	391	6	-	Zea mays	cis-acting regulatory element essential for the anaerobic induction
PITA_10671	ARE	AAACCA	1741	6	-	Zea mays	cis-acting regulatory element essential for the anaerobic induction
PITA_10671	TATC-box	TATCCCA	213	7	+	Oryza sativa	cis-acting element involved in gibberellin-responsiveness
PITA_10671	TATC-box	TATCCCA	1547	7	-	Oryza sativa	cis-acting element involved in gibberellin-responsiveness
PITA_10671	CCAAT-box	CAACGG	382	6	-	Hordeum vulgare	MYBHv1 binding site
PITA_10671	GATA-motif	GATAGGG	834	7	-	Pisum sativum	part of a light responsive element
PITA_10671	GATA-motif	AAGGATAAGG	1515	9	+	Solanum tuberosum	part of a light responsive element
PITA_10671	GATA-motif	AAGGATAAGG	1701	9	-	Solanum tuberosum	part of a light responsive element
PITA_10671	CGTCA-motif	CGTCA	1097	5	-	Hordeum vulgare	cis-acting regulatory element involved in the MeJA-responsiveness
PITA_10671	TGA-element	AACGAC	1168	6	-	Brassica oleracea	auxin-responsive element
PITA_10698	GATT-motif	CTCCTGATTAGC	1953	11	+	Zea mays	part of a light responsive element
PITA_10698	MSA-like	TCCAACGGT	1125	9	+	Catharanthus roseus	cis-acting element involved in cell cycle regulation
PITA_10698	TCA-element	CCATCTTTTT	402	9	-	Nicotiana tabacum	cis-acting element involved in salicylic acid responsiveness
PITA_10698	TCT-motif	TCTTAC	442	6	-	Arabidopsis thaliana	part of a light responsive element
PITA_10698	HD-Zip 3	GTAAT(G/C)ATTAC	874	9.5	+	Arabidopsis thaliana	protein binding site
PITA_10698	GCN4_motif	TGAGTCA	554	7	-	Oryza sativa	cis-regulatory element involved in endosperm expression
PITA_10698	RY-element	CATGCATG	1542	8	-	Helianthus annuus	cis-acting regulatory element involved in seed-specific regulation
PITA_10698	G-box	CACGTC	971	6	-	Zea mays	cis-acting regulatory element involved in light responsiveness
PITA_10698	AE-box	AGAAACTT	29	8	+	Arabidopsis thaliana	part of a module for light response
PITA_10698	AE-box	AGAAACAA	460	8	+	Arabidopsis thaliana	part of a module for light response
PITA_10698	P-box	CCTTTTG	1535	7	+	Oryza sativa	gibberellin-responsive element
PITA_10698	GATA-motif	GATAGGG	979	7	+	Pisum sativum	part of a light responsive element
PITA_10698	CCAAT-box	CAACGG	1127	6	+	Hordeum vulgare	MYBHv1 binding site
PITA_10698	ABRE	ACGTG	972	5	+	Arabidopsis thaliana	cis-acting element involved in the abscisic acid responsiveness
PITA_10698	TATC-box	TATCCCA	1928	7	-	Oryza sativa	cis-acting element involved in gibberellin-responsiveness
PITA_10698	ARE	AAACCA	1432	6	+	Zea mays	cis-acting regulatory element essential for the anaerobic induction
PITA_10698	ARE	AAACCA	1577	6	-	Zea mays	cis-acting regulatory element essential for the anaerobic induction
PITA_10968	GARE-motif	TCTGTTG	151	7	+	Brassica oleracea	gibberellin-responsive element
PITA_10968	O2-site	GATGACATGG	1299	9	-	Zea mays	cis-acting regulatory element involved in zein metabolism regulation
PITA_10968	AT-rich element	ATAGAAATCAA	284	10	-	Glycine max	binding site of AT-rich DNA binding protein (ATBP-1)
PITA_10968	GCN4_motif	TGAGTCA	954	7	-	Oryza sativa	cis-regulatory element involved in endosperm expression
PITA_10968	Box 4	ATTAAT	465	6	+	Petroselinum crispum	part of a conserved DNA module involved in light responsiveness
PITA_10968	TGACG-motif	TGACG	663	5	-	Hordeum vulgare	cis-acting regulatory element involved in the MeJA-responsiveness
PITA_10968	TGACG-motif	TGACG	1310	5	+	Hordeum vulgare	cis-acting regulatory element involved in the MeJA-responsiveness
PITA_10968	TGACG-motif	TGACG	1313	5	-	Hordeum vulgare	cis-acting regulatory element involved in the MeJA-responsiveness
PITA_10968	TGACG-motif	TGACG	1399	5	+	Hordeum vulgare	cis-acting regulatory element involved in the MeJA-responsiveness
PITA_10968	G-box	TACGTG	1191	6	+	Arabidopsis thaliana	cis-acting regulatory element involved in light responsiveness
PITA_10968	AE-box	AGAAACTT	98	8	-	Arabidopsis thaliana	part of a module for light response
PITA_10968	P-box	CCTTTTG	999	7	-	Oryza sativa	gibberellin-responsive element
PITA_10968	TGA-element	AACGAC	1924	6	-	Brassica oleracea	auxin-responsive element
PITA_10968	CGTCA-motif	CGTCA	663	5	+	Hordeum vulgare	cis-acting regulatory element involved in the MeJA-responsiveness
PITA_10968	CGTCA-motif	CGTCA	1310	5	-	Hordeum vulgare	cis-acting regulatory element involved in the MeJA-responsiveness
PITA_10968	CGTCA-motif	CGTCA	1313	5	+	Hordeum vulgare	cis-acting regulatory element involved in the MeJA-responsiveness
PITA_10968	CGTCA-motif	CGTCA	1399	5	-	Hordeum vulgare	cis-acting regulatory element involved in the MeJA-responsiveness
PITA_10968	ABRE	ACGTG	1192	5	+	Arabidopsis thaliana	cis-acting element involved in the abscisic acid responsiveness
PITA_10968	ARE	AAACCA	496	6	+	Zea mays	cis-acting regulatory element essential for the anaerobic induction
PITA_10968	ARE	AAACCA	574	6	+	Zea mays	cis-acting regulatory element essential for the anaerobic induction
PITA_10968	ARE	AAACCA	749	6	-	Zea mays	cis-acting regulatory element essential for the anaerobic induction
PITA_10968	ARE	AAACCA	1157	6	+	Zea mays	cis-acting regulatory element essential for the anaerobic induction
PITA_10968	ARE	AAACCA	1411	6	-	Zea mays	cis-acting regulatory element essential for the anaerobic induction
PITA_10968	CAT-box	GCCACT	1774	6	-	Arabidopsis thaliana	cis-acting regulatory element related to meristem expression
PITA_11141	I-box	TGATAATGT	1051	9	-	Solanum tuberosum	part of a light responsive element
PITA_11141	I-box	TGATAATGT	1172	9	-	Solanum tuberosum	part of a light responsive element
PITA_11141	GCN4_motif	TGAGTCA	459	7	-	Oryza sativa	cis-regulatory element involved in endosperm expression
PITA_11141	3-AF1 binding site	TAAGAGAGGAA	286	10	+	Solanum tuberosum	light responsive element
PITA_11141	GARE-motif	TCTGTTG	1422	7	-	Brassica oleracea	gibberellin-responsive element
PITA_11141	TCA-element	TCAGAAGAGG	53	9	+	Brassica oleracea	cis-acting element involved in salicylic acid responsiveness
PITA_11141	O2-site	GATGATGTGG	1927	9	-	Zea mays	cis-acting regulatory element involved in zein metabolism regulation
PITA_11141	CGTCA-motif	CGTCA	40	5	-	Hordeum vulgare	cis-acting regulatory element involved in the MeJA-responsiveness
PITA_11141	CGTCA-motif	CGTCA	80	5	-	Hordeum vulgare	cis-acting regulatory element involved in the MeJA-responsiveness
PITA_11141	CGTCA-motif	CGTCA	1719	5	+	Hordeum vulgare	cis-acting regulatory element involved in the MeJA-responsiveness
PITA_11141	GATA-motif	GATAGGG	1386	7	-	Pisum sativum	part of a light responsive element
PITA_11141	TGA-element	AACGAC	1487	6	+	Brassica oleracea	auxin-responsive element
PITA_11141	ARE	AAACCA	584	6	+	Zea mays	cis-acting regulatory element essential for the anaerobic induction
PITA_11141	ARE	AAACCA	980	6	+	Zea mays	cis-acting regulatory element essential for the anaerobic induction
PITA_11141	ARE	AAACCA	1036	6	+	Zea mays	cis-acting regulatory element essential for the anaerobic induction
PITA_11141	ARE	AAACCA	1104	6	+	Zea mays	cis-acting regulatory element essential for the anaerobic induction
PITA_11141	ARE	AAACCA	1157	6	+	Zea mays	cis-acting regulatory element essential for the anaerobic induction
PITA_11141	ARE	AAACCA	1542	6	-	Zea mays	cis-acting regulatory element essential for the anaerobic induction
PITA_11141	CAT-box	GCCACT	897	6	+	Arabidopsis thaliana	cis-acting regulatory element related to meristem expression
PITA_11141	CAT-box	GCCACT	1068	6	+	Arabidopsis thaliana	cis-acting regulatory element related to meristem expression
PITA_11141	MBS	CAACTG	107	6	-	Arabidopsis thaliana	MYB binding site involved in drought-inducibility
PITA_11141	ABRE	TACGTGTC	1642	8	+	Oryza sativa	cis-acting element involved in the abscisic acid responsiveness
PITA_11141	ABRE	ACGTG	1643	5	+	Arabidopsis thaliana	cis-acting element involved in the abscisic acid responsiveness
PITA_11141	ABRE	ACGTG	1672	5	-	Arabidopsis thaliana	cis-acting element involved in the abscisic acid responsiveness
PITA_11141	Sp1	GGGCGG	320	6	+	Oryza sativa	light responsive element
PITA_11141	TGACG-motif	TGACG	40	5	+	Hordeum vulgare	cis-acting regulatory element involved in the MeJA-responsiveness
PITA_11141	TGACG-motif	TGACG	80	5	+	Hordeum vulgare	cis-acting regulatory element involved in the MeJA-responsiveness
PITA_11141	TGACG-motif	TGACG	1719	5	-	Hordeum vulgare	cis-acting regulatory element involved in the MeJA-responsiveness
PITA_11141	G-Box	CACGTT	1672	6	+	Pisum sativum	cis-acting regulatory element involved in light responsiveness
PITA_11141	ACE	GACACGTATG	1640	10	-	Petroselinum crispum	cis-acting element involved in light responsiveness
PITA_11141	circadian	CAAAGATATC	1189	9	+	Lycopersicon esculentum	cis-acting regulatory element involved in circadian control
PITA_11141	Box 4	ATTAAT	363	6	+	Petroselinum crispum	part of a conserved DNA module involved in light responsiveness
PITA_11141	Box 4	ATTAAT	1599	6	-	Petroselinum crispum	part of a conserved DNA module involved in light responsiveness
PITA_11141	G-box	CACGAC	309	6	+	Zea mays	cis-acting regulatory element involved in light responsiveness
PITA_11141	G-box	TACGTG	1642	6	+	Arabidopsis thaliana	cis-acting regulatory element involved in light responsiveness
PITA_11146	G-box	TACGTG	1891	6	-	Arabidopsis thaliana	cis-acting regulatory element involved in light responsiveness
PITA_11146	Box 4	ATTAAT	1050	6	-	Petroselinum crispum	part of a conserved DNA module involved in light responsiveness
PITA_11146	Box 4	ATTAAT	1054	6	-	Petroselinum crispum	part of a conserved DNA module involved in light responsiveness
PITA_11146	CAT-box	GCCACT	420	6	+	Arabidopsis thaliana	cis-acting regulatory element related to meristem expression
PITA_11146	CAT-box	GCCACT	1949	6	-	Arabidopsis thaliana	cis-acting regulatory element related to meristem expression
PITA_11146	TC-rich repeats	GTTTTCTTAC	431	9	-	Nicotiana tabacum	cis-acting element involved in defense and stress responsiveness
PITA_11146	TC-rich repeats	ATTCTCTAAC	1367	9	-	Nicotiana tabacum	cis-acting element involved in defense and stress responsiveness
PITA_11146	ABRE	CGTACGTGCA	1889	9	-	Hordeum vulgare	cis-acting element involved in the abscisic acid responsiveness
PITA_11146	ABRE	ACGTG	1891	5	-	Arabidopsis thaliana	cis-acting element involved in the abscisic acid responsiveness
PITA_11146	TGA-element	AACGAC	991	6	+	Brassica oleracea	auxin-responsive element
PITA_11146	TGA-element	AACGAC	1712	6	-	Brassica oleracea	auxin-responsive element
PITA_11146	GT1-motif	GGTTAAT	894	7	-	Avena sativa	light responsive element
PITA_11146	GT1-motif	GGTTAA	895	6	-	Arabidopsis thaliana	light responsive element
PITA_11766	ABRE	CGTACGTGCA	1700	9	-	Hordeum vulgare	cis-acting element involved in the abscisic acid responsiveness
PITA_11766	AT-rich element	ATAGAAATCAA	1835	10	+	Glycine max	binding site of AT-rich DNA binding protein (ATBP-1)
PITA_11766	TCA-element	CCATCTTTTT	1945	9	+	Nicotiana tabacum	cis-acting element involved in salicylic acid responsiveness
PITA_11766	GC-motif	CCCCCG	1891	6	+	Zea mays	enhancer-like element involved in anoxic specific inducibility
PITA_11766	ARE	AAACCA	1973	6	-	Zea mays	cis-acting regulatory element essential for the anaerobic induction
PITA_11770	GT1-motif	GGTTAA	229	6	-	Arabidopsis thaliana	light responsive element
PITA_11770	TCA-element	CCATCTTTTT	1136	9	+	Nicotiana tabacum	cis-acting element involved in salicylic acid responsiveness
PITA_11770	TCA-element	CCATCTTTTT	1945	9	+	Nicotiana tabacum	cis-acting element involved in salicylic acid responsiveness
PITA_11770	CAT-box	GCCACT	367	6	+	Arabidopsis thaliana	cis-acting regulatory element related to meristem expression
PITA_11770	TATC-box	TATCCCA	728	7	+	Oryza sativa	cis-acting element involved in gibberellin-responsiveness
PITA_11770	ABRE	CGTACGTGCA	1695	9	-	Hordeum vulgare	cis-acting element involved in the abscisic acid responsiveness
PITA_11770	Box 4	ATTAAT	64	6	+	Petroselinum crispum	part of a conserved DNA module involved in light responsiveness
PITA_11770	Box 4	ATTAAT	92	6	+	Petroselinum crispum	part of a conserved DNA module involved in light responsiveness
PITA_11770	Box 4	ATTAAT	1174	6	-	Petroselinum crispum	part of a conserved DNA module involved in light responsiveness
PITA_11770	Box 4	ATTAAT	1316	6	-	Petroselinum crispum	part of a conserved DNA module involved in light responsiveness
PITA_11770	Box 4	ATTAAT	1343	6	-	Petroselinum crispum	part of a conserved DNA module involved in light responsiveness
PITA_11770	GA-motif	ATAGATAA	139	8	-	Arabidopsis thaliana	part of a light responsive element
PITA_11770	I-box	AGATAAGG	1042	8	+	Triticum aestivum	part of a light responsive element
PITA_11770	TCT-motif	TCTTAC	535	6	-	Arabidopsis thaliana	part of a light responsive element
PITA_11770	TCT-motif	TCTTAC	615	6	-	Arabidopsis thaliana	part of a light responsive element
PITA_11770	TCT-motif	TCTTAC	676	6	-	Arabidopsis thaliana	part of a light responsive element
PITA_11770	GC-motif	CCCCCG	1891	6	+	Zea mays	enhancer-like element involved in anoxic specific inducibility
PITA_11770	ARE	AAACCA	323	6	-	Zea mays	cis-acting regulatory element essential for the anaerobic induction
PITA_11770	ARE	AAACCA	784	6	-	Zea mays	cis-acting regulatory element essential for the anaerobic induction
PITA_11770	ARE	AAACCA	1094	6	+	Zea mays	cis-acting regulatory element essential for the anaerobic induction
PITA_11770	ARE	AAACCA	1973	6	-	Zea mays	cis-acting regulatory element essential for the anaerobic induction
PITA_11770	AT-rich element	ATAGAAATCAA	1835	10	+	Glycine max	binding site of AT-rich DNA binding protein (ATBP-1)
PITA_12274	TCT-motif	TCTTAC	181	6	-	Arabidopsis thaliana	part of a light responsive element
PITA_12274	TCT-motif	TCTTAC	1193	6	-	Arabidopsis thaliana	part of a light responsive element
PITA_12274	TCT-motif	TCTTAC	1848	6	-	Arabidopsis thaliana	part of a light responsive element
PITA_12274	GARE-motif	TCTGTTG	1961	7	+	Brassica oleracea	gibberellin-responsive element
PITA_12274	chs-CMA1a	TTACTTAA	124	8	-	Daucus carota	part of a light responsive element
PITA_12274	G-box	TACGTG	1775	6	-	Arabidopsis thaliana	cis-acting regulatory element involved in light responsiveness
PITA_12274	G-box	CACGTC	2002	6	-	Zea mays	cis-acting regulatory element involved in light responsiveness
PITA_12274	ACE	GACACGTATG	952	9	+	Petroselinum crispum	cis-acting element involved in light responsiveness
PITA_12274	Box 4	ATTAAT	871	6	+	Petroselinum crispum	part of a conserved DNA module involved in light responsiveness
PITA_12274	Box 4	ATTAAT	1605	6	-	Petroselinum crispum	part of a conserved DNA module involved in light responsiveness
PITA_12274	L-box	ATCCCACCTAC	892	10	-	Petroselinum crispum	part of a light responsive element
PITA_12274	LTR	CCGAAA	578	6	+	Hordeum vulgare	cis-acting element involved in low-temperature responsiveness
PITA_12274	DRE	TACCGACAT	720	9	-	Arabidopsis thaliana	cis-acting element involved in dehydration, low-temp, salt stresses
PITA_12274	GC-motif	CCCCCG	592	6	+	Zea mays	enhancer-like element involved in anoxic specific inducibility
PITA_12274	ARE	AAACCA	61	6	+	Zea mays	cis-acting regulatory element essential for the anaerobic induction
PITA_12274	ARE	AAACCA	582	6	+	Zea mays	cis-acting regulatory element essential for the anaerobic induction
PITA_12274	ARE	AAACCA	629	6	-	Zea mays	cis-acting regulatory element essential for the anaerobic induction
PITA_12274	ABRE	ACGTG	1775	5	-	Arabidopsis thaliana	cis-acting element involved in the abscisic acid responsiveness
PITA_12274	ABRE	ACGTG	2003	5	+	Arabidopsis thaliana	cis-acting element involved in the abscisic acid responsiveness
PITA_12274	MBS	CAACTG	452	6	-	Arabidopsis thaliana	MYB binding site involved in drought-inducibility
PITA_12274	MBS	CAACTG	489	6	-	Arabidopsis thaliana	MYB binding site involved in drought-inducibility
PITA_12274	MBS	CAACTG	526	6	+	Arabidopsis thaliana	MYB binding site involved in drought-inducibility
PITA_12322	ABRE	GACACGTGGC	1303	9	+	Triticum aestivum	cis-acting element involved in the abscisic acid responsiveness
PITA_12322	ARE	AAACCA	391	6	+	Zea mays	cis-acting regulatory element essential for the anaerobic induction
PITA_12322	ARE	AAACCA	1829	6	+	Zea mays	cis-acting regulatory element essential for the anaerobic induction
PITA_12322	CAT-box	GCCACT	977	6	-	Arabidopsis thaliana	cis-acting regulatory element related to meristem expression
PITA_12322	CAT-box	GCCACT	1768	6	+	Arabidopsis thaliana	cis-acting regulatory element related to meristem expression
PITA_12322	CGTCA-motif	CGTCA	935	5	-	Hordeum vulgare	cis-acting regulatory element involved in the MeJA-responsiveness
PITA_12322	CGTCA-motif	CGTCA	1282	5	+	Hordeum vulgare	cis-acting regulatory element involved in the MeJA-responsiveness
PITA_12322	G-box	CACGAC	1560	6	+	Zea mays	cis-acting regulatory element involved in light responsiveness
PITA_12322	TCCC-motif	TCTCCCT	1808	7	-	Spinacia oleracea	part of a light responsive element
PITA_12322	TGACG-motif	TGACG	935	5	+	Hordeum vulgare	cis-acting regulatory element involved in the MeJA-responsiveness
PITA_12322	TGACG-motif	TGACG	1282	5	-	Hordeum vulgare	cis-acting regulatory element involved in the MeJA-responsiveness
PITA_12322	ACE	CTAACGTATT	311	9	-	Petroselinum crispum	cis-acting element involved in light responsiveness
PITA_12322	GT1-motif	GGTTAA	763	6	+	Arabidopsis thaliana	light responsive element
PITA_12322	Gap-box	CAAATGAA(A/G)A	1150	9.5	+	Arabidopsis thaliana	part of a light responsive element
PITA_12322	TCT-motif	TCTTAC	957	6	-	Arabidopsis thaliana	part of a light responsive element
PITA_12511	AT-rich sequence	TAAAATACT	1739	9	-	Pisum sativum	element for maximal elicitor-mediated activation (2copies)
PITA_12511	O2-site	GATGATGTGG	226	9	+	Zea mays	cis-acting regulatory element involved in zein metabolism regulation
PITA_12511	GTGGC-motif	GATTCTGTGGC	1949	10	+	Spinacia oleracea	part of a light responsive element
PITA_12511	GT1-motif	GGTTAAT	340	7	+	Avena sativa	light responsive element
PITA_12511	GT1-motif	GGTTAAT	1214	7	+	Avena sativa	light responsive element
PITA_12511	P-box	CCTTTTG	531	7	+	Oryza sativa	gibberellin-responsive element
PITA_12511	CGTCA-motif	CGTCA	1959	5	+	Hordeum vulgare	cis-acting regulatory element involved in the MeJA-responsiveness
PITA_12511	ARE	AAACCA	150	6	-	Zea mays	cis-acting regulatory element essential for the anaerobic induction
PITA_12511	MRE	AACCTAA	1033	7	-	Petroselinum crispum	MYB binding site involved in light responsiveness
PITA_12511	TGACG-motif	TGACG	1959	5	-	Hordeum vulgare	cis-acting regulatory element involved in the MeJA-responsiveness
PITA_12511	circadian	CAAAGATATC	769	9	+	Lycopersicon esculentum	cis-acting regulatory element involved in circadian control
PITA_12511	Box 4	ATTAAT	276	6	+	Petroselinum crispum	part of a conserved DNA module involved in light responsiveness
PITA_12511	Box 4	ATTAAT	692	6	+	Petroselinum crispum	part of a conserved DNA module involved in light responsiveness
PITA_12511	Box 4	ATTAAT	834	6	+	Petroselinum crispum	part of a conserved DNA module involved in light responsiveness
PITA_12511	Box 4	ATTAAT	888	6	+	Petroselinum crispum	part of a conserved DNA module involved in light responsiveness
PITA_12511	Box 4	ATTAAT	901	6	+	Petroselinum crispum	part of a conserved DNA module involved in light responsiveness
PITA_12511	Box 4	ATTAAT	1604	6	-	Petroselinum crispum	part of a conserved DNA module involved in light responsiveness
PITA_12511	AE-box	AGAAACTT	161	8	+	Arabidopsis thaliana	part of a module for light response
PITA_12584	ATCT-motif	AATCTAATCC	992	9	+	Pisum sativum	part of a conserved DNA module involved in light responsiveness
PITA_12584	AT1-motif	AATTATTTTTTATT	1749	13	-	Solanum tuberosum	part of a light responsive module
PITA_12584	CAT-box	GCCACT	1858	6	+	Arabidopsis thaliana	cis-acting regulatory element related to meristem expression
PITA_12584	Box 4	ATTAAT	233	6	+	Petroselinum crispum	part of a conserved DNA module involved in light responsiveness
PITA_12584	Box 4	ATTAAT	280	6	+	Petroselinum crispum	part of a conserved DNA module involved in light responsiveness
PITA_12584	Box 4	ATTAAT	605	6	+	Petroselinum crispum	part of a conserved DNA module involved in light responsiveness
PITA_12584	Box 4	ATTAAT	800	6	+	Petroselinum crispum	part of a conserved DNA module involved in light responsiveness
PITA_12584	Box 4	ATTAAT	1141	6	-	Petroselinum crispum	part of a conserved DNA module involved in light responsiveness
PITA_12584	Box 4	ATTAAT	1249	6	-	Petroselinum crispum	part of a conserved DNA module involved in light responsiveness
PITA_12584	Box 4	ATTAAT	1328	6	-	Petroselinum crispum	part of a conserved DNA module involved in light responsiveness
PITA_12584	Box 4	ATTAAT	1467	6	-	Petroselinum crispum	part of a conserved DNA module involved in light responsiveness
PITA_12584	Box 4	ATTAAT	1535	6	-	Petroselinum crispum	part of a conserved DNA module involved in light responsiveness
PITA_12584	Box 4	ATTAAT	1731	6	-	Petroselinum crispum	part of a conserved DNA module involved in light responsiveness
PITA_12584	Box 4	ATTAAT	1814	6	-	Petroselinum crispum	part of a conserved DNA module involved in light responsiveness
PITA_12584	TGACG-motif	TGACG	754	5	-	Hordeum vulgare	cis-acting regulatory element involved in the MeJA-responsiveness
PITA_12584	TGACG-motif	TGACG	1829	5	-	Hordeum vulgare	cis-acting regulatory element involved in the MeJA-responsiveness
PITA_12584	AT-rich element	ATAGAAATCAA	844	10	+	Glycine max	binding site of AT-rich DNA binding protein (ATBP-1)
PITA_12584	MRE	AACCTAA	1454	7	+	Petroselinum crispum	MYB binding site involved in light responsiveness
PITA_12584	SARE	TTCGACCATCTT	1888	11	-	Nicotiana tabacum	cis-acting element involved in salicylic acid responsiveness
PITA_12584	MBS	CAACTG	1979	6	+	Arabidopsis thaliana	MYB binding site involved in drought-inducibility
PITA_12584	ARE	AAACCA	566	6	+	Zea mays	cis-acting regulatory element essential for the anaerobic induction
PITA_12584	ARE	AAACCA	997	6	+	Zea mays	cis-acting regulatory element essential for the anaerobic induction
PITA_12584	ARE	AAACCA	1315	6	+	Zea mays	cis-acting regulatory element essential for the anaerobic induction
PITA_12584	ARE	AAACCA	1392	6	+	Zea mays	cis-acting regulatory element essential for the anaerobic induction
PITA_12584	ARE	AAACCA	1526	6	+	Zea mays	cis-acting regulatory element essential for the anaerobic induction
PITA_12584	ARE	AAACCA	1670	6	-	Zea mays	cis-acting regulatory element essential for the anaerobic induction
PITA_12584	ARE	AAACCA	1721	6	-	Zea mays	cis-acting regulatory element essential for the anaerobic induction
PITA_12584	TCCC-motif	TCTCCCT	975	7	-	Spinacia oleracea	part of a light responsive element
PITA_12584	GCN4_motif	TGAGTCA	1919	7	-	Oryza sativa	cis-regulatory element involved in endosperm expression
PITA_12584	CGTCA-motif	CGTCA	754	5	+	Hordeum vulgare	cis-acting regulatory element involved in the MeJA-responsiveness
PITA_12584	CGTCA-motif	CGTCA	1829	5	+	Hordeum vulgare	cis-acting regulatory element involved in the MeJA-responsiveness
PITA_12584	Sp1	GGGCGG	1875	6	+	Oryza sativa	light responsive element
PITA_12584	TCT-motif	TCTTAC	555	6	-	Arabidopsis thaliana	part of a light responsive element
PITA_12584	O2-site	GATGA(C/T)(A/G)TG(A/G)	238	8.5	-	Zea mays	cis-acting regulatory element involved in zein metabolism regulation
PITA_12882	MBS	CAACTG	797	6	-	Arabidopsis thaliana	MYB binding site involved in drought-inducibility
PITA_12882	MBS	CAACTG	1155	6	-	Arabidopsis thaliana	MYB binding site involved in drought-inducibility
PITA_12882	CAT-box	GCCACT	201	6	+	Arabidopsis thaliana	cis-acting regulatory element related to meristem expression
PITA_12882	CAT-box	GCCACT	554	6	+	Arabidopsis thaliana	cis-acting regulatory element related to meristem expression
PITA_12882	CAT-box	GCCACT	1429	6	+	Arabidopsis thaliana	cis-acting regulatory element related to meristem expression
PITA_12882	Box 4	ATTAAT	179	6	+	Petroselinum crispum	part of a conserved DNA module involved in light responsiveness
PITA_12882	Box 4	ATTAAT	1965	6	-	Petroselinum crispum	part of a conserved DNA module involved in light responsiveness
PITA_12882	G-box	CACGAC	1473	6	+	Zea mays	cis-acting regulatory element involved in light responsiveness
PITA_12882	chs-CMA2a	TCACTTGA	503	8	+	Petroselinum crispum	part of a light responsive element
PITA_12882	AE-box	AGAAACAA	703	8	-	Arabidopsis thaliana	part of a module for light response
PITA_12882	AT-rich element	ATAGAAATCAA	828	10	+	Glycine max	binding site of AT-rich DNA binding protein (ATBP-1)
PITA_12882	GARE-motif	TCTGTTG	1068	7	-	Brassica oleracea	gibberellin-responsive element
PITA_12882	MSA-like	TCAAACGGT	100	9	+	Catharanthus roseus	cis-acting element involved in cell cycle regulation
PITA_12934	AE-box	AGAAACAA	802	8	+	Arabidopsis thaliana	part of a module for light response
PITA_12934	circadian	CAAAGATATC	1137	9	-	Lycopersicon esculentum	cis-acting regulatory element involved in circadian control
PITA_12934	TGACG-motif	TGACG	919	5	-	Hordeum vulgare	cis-acting regulatory element involved in the MeJA-responsiveness
PITA_12934	LTR	CCGAAA	274	6	-	Hordeum vulgare	cis-acting element involved in low-temperature responsiveness
PITA_12934	LTR	CCGAAA	304	6	-	Hordeum vulgare	cis-acting element involved in low-temperature responsiveness
PITA_12934	ARE	AAACCA	620	6	+	Zea mays	cis-acting regulatory element essential for the anaerobic induction
PITA_12934	ARE	AAACCA	1041	6	+	Zea mays	cis-acting regulatory element essential for the anaerobic induction
PITA_12934	CAT-box	GCCACT	1222	6	+	Arabidopsis thaliana	cis-acting regulatory element related to meristem expression
PITA_12934	CAT-box	GCCACT	1881	6	-	Arabidopsis thaliana	cis-acting regulatory element related to meristem expression
PITA_12934	CCAAT-box	CAACGG	871	6	-	Hordeum vulgare	MYBHv1 binding site
PITA_12934	MBS	CAACTG	741	6	-	Arabidopsis thaliana	MYB binding site involved in drought-inducibility
PITA_12934	ATC-motif	AGTAATCT	371	8	+	Spinacia oleracea	part of a conserved DNA module involved in light responsiveness
PITA_12934	CGTCA-motif	CGTCA	919	5	+	Hordeum vulgare	cis-acting regulatory element involved in the MeJA-responsiveness
PITA_12934	ATCT-motif	AATCTAATCC	1453	9	-	Pisum sativum	part of a conserved DNA module involved in light responsiveness
PITA_12934	ATCT-motif	AATCTAATCC	1491	9	-	Pisum sativum	part of a conserved DNA module involved in light responsiveness
PITA_12934	O2-site	GTTGACGTGA	1559	9	-	Zea mays	cis-acting regulatory element involved in zein metabolism regulation
PITA_12934	O2-site	GTTGACGTGA	1971	9	-	Zea mays	cis-acting regulatory element involved in zein metabolism regulation
PITA_12934	TGGCA	GACACCAAGTGGCA	1221	13	-	Oryza sativa	part of a light responsive element
PITA_12934	TGGCA	GACACCAAGTGGCA	1874	13	+	Oryza sativa	part of a light responsive element
PITA_12934	GCN4_motif	TGAGTCA	1967	7	-	Oryza sativa	cis-regulatory element involved in endosperm expression
PITA_13056	TATC-box	TATCCCA	1765	7	+	Oryza sativa	cis-acting element involved in gibberellin-responsiveness
PITA_13056	AuxRE	TGTCTCAATAAG	997	11	+	Glycine max	part of an auxin-responsive element
PITA_13056	GATA-motif	GATAGGA	1112	7	-	Arabidopsis thaliana	part of a light responsive element
PITA_13056	GT1-motif	GGTTAAT	1056	7	-	Avena sativa	light responsive element
PITA_13056	GT1-motif	GGTTAA	1057	6	-	Arabidopsis thaliana	light responsive element
PITA_13056	GT1-motif	GGTTAA	1211	6	-	Arabidopsis thaliana	light responsive element
PITA_13056	MBS	CAACTG	214	6	+	Arabidopsis thaliana	MYB binding site involved in drought-inducibility
PITA_13056	MBS	CAACTG	227	6	-	Arabidopsis thaliana	MYB binding site involved in drought-inducibility
PITA_13056	MBS	CAACTG	774	6	-	Arabidopsis thaliana	MYB binding site involved in drought-inducibility
PITA_13056	MBS	CAACTG	953	6	-	Arabidopsis thaliana	MYB binding site involved in drought-inducibility
PITA_13056	MBS	CAACTG	1411	6	+	Arabidopsis thaliana	MYB binding site involved in drought-inducibility
PITA_13056	ABRE	ACGTG	815	5	-	Arabidopsis thaliana	cis-acting element involved in the abscisic acid responsiveness
PITA_13056	MRE	AACCTAA	492	7	-	Petroselinum crispum	MYB binding site involved in light responsiveness
PITA_13056	MRE	AACCTAA	506	7	-	Petroselinum crispum	MYB binding site involved in light responsiveness
PITA_13056	TGA-element	AACGAC	83	6	+	Brassica oleracea	auxin-responsive element
PITA_13056	G-Box	CACGTT	815	6	+	Pisum sativum	cis-acting regulatory element involved in light responsiveness
PITA_13056	Box II	ACACGTTGT	814	9	+	Sinapis alba	part of a light responsive element
PITA_13056	TCA-element	TCAGAAGAGG	235	9	+	Brassica oleracea	cis-acting element involved in salicylic acid responsiveness
PITA_13056	Box 4	ATTAAT	295	6	+	Petroselinum crispum	part of a conserved DNA module involved in light responsiveness
PITA_13056	Box 4	ATTAAT	1394	6	-	Petroselinum crispum	part of a conserved DNA module involved in light responsiveness
PITA_13056	A-box	CCGTCC	1563	6	+	Petroselinum crispum	cis-acting regulatory element
PITA_13056	ATCT-motif	AATCTAATCC	638	9	+	Pisum sativum	part of a conserved DNA module involved in light responsiveness
PITA_13317	AT-rich element	ATAGAAATCAA	537	10	-	Glycine max	binding site of AT-rich DNA binding protein (ATBP-1)
PITA_13317	AT-rich element	ATAGAAATCAA	1562	10	-	Glycine max	binding site of AT-rich DNA binding protein (ATBP-1)
PITA_13317	AT-rich element	ATAGAAATCAA	1637	10	-	Glycine max	binding site of AT-rich DNA binding protein (ATBP-1)
PITA_13317	A-box	CCGTCC	2008	6	-	Petroselinum crispum	cis-acting regulatory element
PITA_13317	GARE-motif	TCTGTTG	420	7	+	Brassica oleracea	gibberellin-responsive element
PITA_13317	TCT-motif	TCTTAC	1305	6	+	Arabidopsis thaliana	part of a light responsive element
PITA_13317	O2-site	GATGACATGG	1400	10	-	Zea mays	cis-acting regulatory element involved in zein metabolism regulation
PITA_13317	TGA-element	AACGAC	1924	6	-	Brassica oleracea	auxin-responsive element
PITA_13317	P-box	CCTTTTG	1015	7	-	Oryza sativa	gibberellin-responsive element
PITA_13317	GATA-motif	GATAGGA	1688	7	+	Arabidopsis thaliana	part of a light responsive element
PITA_13317	CGTCA-motif	CGTCA	1411	5	-	Hordeum vulgare	cis-acting regulatory element involved in the MeJA-responsiveness
PITA_13317	CGTCA-motif	CGTCA	1414	5	+	Hordeum vulgare	cis-acting regulatory element involved in the MeJA-responsiveness
PITA_13317	HD-Zip 1	CAAT(A/T)ATTG	139	8.5	+	Arabidopsis thaliana	element involved in differentiation of the palisade mesophyll cells
PITA_13317	MBS	CAACTG	1456	6	-	Arabidopsis thaliana	MYB binding site involved in drought-inducibility
PITA_13317	TC-rich repeats	ATTCTCTAAC	546	9	+	Nicotiana tabacum	cis-acting element involved in defense and stress responsiveness
PITA_13317	ARE	AAACCA	827	6	+	Zea mays	cis-acting regulatory element essential for the anaerobic induction
PITA_13317	ARE	AAACCA	1259	6	+	Zea mays	cis-acting regulatory element essential for the anaerobic induction
PITA_13317	ARE	AAACCA	1508	6	-	Zea mays	cis-acting regulatory element essential for the anaerobic induction
PITA_13317	MRE	AACCTAA	607	7	-	Petroselinum crispum	MYB binding site involved in light responsiveness
PITA_13317	Box 4	ATTAAT	718	6	+	Petroselinum crispum	part of a conserved DNA module involved in light responsiveness
PITA_13317	Box 4	ATTAAT	814	6	+	Petroselinum crispum	part of a conserved DNA module involved in light responsiveness
PITA_13317	Box 4	ATTAAT	972	6	+	Petroselinum crispum	part of a conserved DNA module involved in light responsiveness
PITA_13317	ACE	CTAACGTATT	989	9	+	Petroselinum crispum	cis-acting element involved in light responsiveness
PITA_13317	ACE	CTAACGTATT	1083	9	+	Petroselinum crispum	cis-acting element involved in light responsiveness
PITA_13317	TGACG-motif	TGACG	1411	5	+	Hordeum vulgare	cis-acting regulatory element involved in the MeJA-responsiveness
PITA_13317	TGACG-motif	TGACG	1414	5	-	Hordeum vulgare	cis-acting regulatory element involved in the MeJA-responsiveness
PITA_13317	CAG-motif	GAAAGGCAGAC	498	10	+	Arabidopsis thaliana	part of a light response element
PITA_13317	G-box	CACGAC	802	6	-	Zea mays	cis-acting regulatory element involved in light responsiveness
PITA_13485	G-box	CACGAC	1911	6	-	Zea mays	cis-acting regulatory element involved in light responsiveness
PITA_13485	LAMP-element	CTTTATCA	548	8	-	Pisum sativum	part of a light responsive element
PITA_13485	Box III	atCATTTTCACt	865	11	-	Pisum sativum	protein binding site
PITA_13485	Box III	atCATTTTCACt	972	11	-	Pisum sativum	protein binding site
PITA_13485	Box 4	ATTAAT	272	6	+	Petroselinum crispum	part of a conserved DNA module involved in light responsiveness
PITA_13485	Box 4	ATTAAT	276	6	+	Petroselinum crispum	part of a conserved DNA module involved in light responsiveness
PITA_13485	Box 4	ATTAAT	588	6	+	Petroselinum crispum	part of a conserved DNA module involved in light responsiveness
PITA_13485	Box 4	ATTAAT	1226	6	-	Petroselinum crispum	part of a conserved DNA module involved in light responsiveness
PITA_13485	Box 4	ATTAAT	1375	6	-	Petroselinum crispum	part of a conserved DNA module involved in light responsiveness
PITA_13485	Box 4	ATTAAT	1391	6	-	Petroselinum crispum	part of a conserved DNA module involved in light responsiveness
PITA_13485	Box 4	ATTAAT	1778	6	-	Petroselinum crispum	part of a conserved DNA module involved in light responsiveness
PITA_13485	ARE	AAACCA	460	6	-	Zea mays	cis-acting regulatory element essential for the anaerobic induction
PITA_13485	ARE	AAACCA	1239	6	-	Zea mays	cis-acting regulatory element essential for the anaerobic induction
PITA_13485	ARE	AAACCA	1342	6	-	Zea mays	cis-acting regulatory element essential for the anaerobic induction
PITA_13485	ARE	AAACCA	1716	6	-	Zea mays	cis-acting regulatory element essential for the anaerobic induction
PITA_13485	ARE	AAACCA	1749	6	-	Zea mays	cis-acting regulatory element essential for the anaerobic induction
PITA_13485	ARE	AAACCA	1897	6	-	Zea mays	cis-acting regulatory element essential for the anaerobic induction
PITA_13485	ARE	AAACCA	2008	6	+	Zea mays	cis-acting regulatory element essential for the anaerobic induction
PITA_13485	P-box	CCTTTTG	1295	7	-	Oryza sativa	gibberellin-responsive element
PITA_13485	O2-site	GATGACATGG	1761	9	+	Zea mays	cis-acting regulatory element involved in zein metabolism regulation
PITA_13485	GT1-motif	GGTTAAT	1431	7	+	Avena sativa	light responsive element
PITA_13485	chs-CMA1a	TTACTTAA	1569	8	+	Daucus carota	part of a light responsive element
PITA_13485	GCN4_motif	TGAGTCA	1135	7	+	Oryza sativa	cis-regulatory element involved in endosperm expression
PITA_13485	I-box	cGATAAGGCG	163	9	-	Zea mays	part of a light responsive element
PITA_13531	CCAAT-box	CAACGG	245	6	+	Hordeum vulgare	MYBHv1 binding site
PITA_13531	Sp1	GGGCGG	1246	6	-	Oryza sativa	light responsive element
PITA_13531	Sp1	GGGCGG	1829	6	+	Oryza sativa	light responsive element
PITA_13531	ARE	AAACCA	147	6	-	Zea mays	cis-acting regulatory element essential for the anaerobic induction
PITA_13531	ARE	AAACCA	1066	6	+	Zea mays	cis-acting regulatory element essential for the anaerobic induction
PITA_13531	ARE	AAACCA	1281	6	-	Zea mays	cis-acting regulatory element essential for the anaerobic induction
PITA_13531	ARE	AAACCA	1437	6	-	Zea mays	cis-acting regulatory element essential for the anaerobic induction
PITA_13531	ARE	AAACCA	1524	6	+	Zea mays	cis-acting regulatory element essential for the anaerobic induction
PITA_13531	MBS	CAACTG	347	6	-	Arabidopsis thaliana	MYB binding site involved in drought-inducibility
PITA_13531	MBS	CAACTG	975	6	+	Arabidopsis thaliana	MYB binding site involved in drought-inducibility
PITA_13531	G-box	CACGTG	1652	6	-	Arabidopsis thaliana	cis-acting regulatory element involved in light responsiveness
PITA_13531	CGTCA-motif	CGTCA	1112	5	+	Hordeum vulgare	cis-acting regulatory element involved in the MeJA-responsiveness
PITA_13531	CGTCA-motif	CGTCA	1717	5	+	Hordeum vulgare	cis-acting regulatory element involved in the MeJA-responsiveness
PITA_13531	CGTCA-motif	CGTCA	1747	5	-	Hordeum vulgare	cis-acting regulatory element involved in the MeJA-responsiveness
PITA_13531	CGTCA-motif	CGTCA	1847	5	-	Hordeum vulgare	cis-acting regulatory element involved in the MeJA-responsiveness
PITA_13531	TCA-element	CCATCTTTTT	583	9	-	Nicotiana tabacum	cis-acting element involved in salicylic acid responsiveness
PITA_13531	MBSI	TTTTTACGGTTA	1476	11	+	Petunia hybrida	MYB binding site involved in flavonoid biosynthetic genes regulation
PITA_13531	G-Box	CACGTT	830	6	-	Pisum sativum	cis-acting regulatory element involved in light responsiveness
PITA_13531	G-Box	CACGTT	925	6	-	Pisum sativum	cis-acting regulatory element involved in light responsiveness
PITA_13531	G-Box	CACGTG	1652	6	-	Pisum sativum	cis-acting regulatory element involved in light responsiveness
PITA_13531	G-Box	CACGTT	1811	6	-	Pisum sativum	cis-acting regulatory element involved in light responsiveness
PITA_13531	TGA-element	AACGAC	1099	6	-	Brassica oleracea	auxin-responsive element
PITA_13531	circadian	CAAAGATATC	1150	9	+	Lycopersicon esculentum	cis-acting regulatory element involved in circadian control
PITA_13531	ABRE	ACGTG	831	5	+	Arabidopsis thaliana	cis-acting element involved in the abscisic acid responsiveness
PITA_13531	ABRE	ACGTG	926	5	+	Arabidopsis thaliana	cis-acting element involved in the abscisic acid responsiveness
PITA_13531	ABRE	CACGTG	1652	6	-	Arabidopsis thaliana	cis-acting element involved in the abscisic acid responsiveness
PITA_13531	ABRE	ACGTG	1653	5	+	Arabidopsis thaliana	cis-acting element involved in the abscisic acid responsiveness
PITA_13531	ABRE	ACGTG	1812	5	+	Arabidopsis thaliana	cis-acting element involved in the abscisic acid responsiveness
PITA_13531	TC-rich repeats	ATTCTCTAAC	1603	9	-	Nicotiana tabacum	cis-acting element involved in defense and stress responsiveness
PITA_13531	AE-box	AGAAACAA	380	8	+	Arabidopsis thaliana	part of a module for light response
PITA_13531	AE-box	AGAAACAA	1358	8	-	Arabidopsis thaliana	part of a module for light response
PITA_13531	AE-box	AGAAACAA	1779	8	-	Arabidopsis thaliana	part of a module for light response
PITA_13531	I-box	gGATAAGGTG	1643	9	-	Zea mays	part of a light responsive element
PITA_13531	TGACG-motif	TGACG	1112	5	-	Hordeum vulgare	cis-acting regulatory element involved in the MeJA-responsiveness
PITA_13531	TGACG-motif	TGACG	1717	5	-	Hordeum vulgare	cis-acting regulatory element involved in the MeJA-responsiveness
PITA_13531	TGACG-motif	TGACG	1747	5	+	Hordeum vulgare	cis-acting regulatory element involved in the MeJA-responsiveness
PITA_13531	TGACG-motif	TGACG	1847	5	+	Hordeum vulgare	cis-acting regulatory element involved in the MeJA-responsiveness
PITA_13531	Box 4	ATTAAT	618	6	+	Petroselinum crispum	part of a conserved DNA module involved in light responsiveness
PITA_13626	LAMP-element	CTTTATCA	217	8	-	Pisum sativum	part of a light responsive element
PITA_13626	G-Box	CACGTT	981	6	-	Pisum sativum	cis-acting regulatory element involved in light responsiveness
PITA_13626	LTR	CCGAAA	1159	6	-	Hordeum vulgare	cis-acting element involved in low-temperature responsiveness
PITA_13626	LTR	CCGAAA	1801	6	-	Hordeum vulgare	cis-acting element involved in low-temperature responsiveness
PITA_13626	Box 4	ATTAAT	161	6	+	Petroselinum crispum	part of a conserved DNA module involved in light responsiveness
PITA_13626	Box 4	ATTAAT	525	6	+	Petroselinum crispum	part of a conserved DNA module involved in light responsiveness
PITA_13626	Box 4	ATTAAT	599	6	+	Petroselinum crispum	part of a conserved DNA module involved in light responsiveness
PITA_13626	Box 4	ATTAAT	1369	6	-	Petroselinum crispum	part of a conserved DNA module involved in light responsiveness
PITA_13626	G-box	TACGTG	1846	6	+	Arabidopsis thaliana	cis-acting regulatory element involved in light responsiveness
PITA_13626	TGA-element	AACGAC	1295	6	+	Brassica oleracea	auxin-responsive element
PITA_13626	TGA-element	AACGAC	1583	6	+	Brassica oleracea	auxin-responsive element
PITA_13626	TGA-element	AACGAC	1816	6	-	Brassica oleracea	auxin-responsive element
PITA_13626	MBS	CAACTG	1099	6	+	Arabidopsis thaliana	MYB binding site involved in drought-inducibility
PITA_13626	ABRE	ACGTG	982	5	+	Arabidopsis thaliana	cis-acting element involved in the abscisic acid responsiveness
PITA_13626	ABRE	ACGTG	1847	5	+	Arabidopsis thaliana	cis-acting element involved in the abscisic acid responsiveness
PITA_13626	A-box	CCGTCC	1615	6	-	Petroselinum crispum	cis-acting regulatory element
PITA_13626	TCT-motif	TCTTAC	1759	6	-	Arabidopsis thaliana	part of a light responsive element
PITA_13626	GT1-motif	GGTTAAT	347	7	+	Avena sativa	light responsive element
PITA_13626	GT1-motif	GGTTAAT	1717	7	-	Avena sativa	light responsive element
PITA_13626	GT1-motif	GGTTAA	1718	6	-	Arabidopsis thaliana	light responsive element
PITA_13952	TCT-motif	TCTTAC	1372	6	+	Arabidopsis thaliana	part of a light responsive element
PITA_13952	chs-CMA1a	TTACTTAA	1095	8	+	Daucus carota	part of a light responsive element
PITA_13952	chs-CMA1a	TTACTTAA	1389	8	-	Daucus carota	part of a light responsive element
PITA_13952	GARE-motif	TCTGTTG	314	7	-	Brassica oleracea	gibberellin-responsive element
PITA_13952	GT1-motif	GGTTAAT	1593	7	+	Avena sativa	light responsive element
PITA_13952	O2-site	GATGA(C/T)(A/G)TG(A/G)	890	8	+	Zea mays	cis-acting regulatory element involved in zein metabolism regulation
PITA_13952	circadian	CAAAGATATC	357	9	-	Lycopersicon esculentum	cis-acting regulatory element involved in circadian control
PITA_13952	G-Box	CACGTG	1537	6	-	Pisum sativum	cis-acting regulatory element involved in light responsiveness
PITA_13952	LTR	CCGAAA	512	6	-	Hordeum vulgare	cis-acting element involved in low-temperature responsiveness
PITA_13952	LTR	CCGAAA	1850	6	+	Hordeum vulgare	cis-acting element involved in low-temperature responsiveness
PITA_13952	MRE	AACCTAA	852	7	-	Petroselinum crispum	MYB binding site involved in light responsiveness
PITA_13952	G-box	TACGTG	84	6	-	Arabidopsis thaliana	cis-acting regulatory element involved in light responsiveness
PITA_13952	G-box	CACGTG	1537	6	-	Arabidopsis thaliana	cis-acting regulatory element involved in light responsiveness
PITA_13952	G-box	CACGAC	1674	6	-	Zea mays	cis-acting regulatory element involved in light responsiveness
PITA_13952	G-box	CACGAC	1883	6	-	Zea mays	cis-acting regulatory element involved in light responsiveness
PITA_13952	ATCT-motif	AATCTAATCC	451	9	-	Pisum sativum	part of a conserved DNA module involved in light responsiveness
PITA_13952	TGA-element	AACGAC	1894	6	-	Brassica oleracea	auxin-responsive element
PITA_13952	TC-rich repeats	GTTTTCTTAC	673	9	-	Nicotiana tabacum	cis-acting element involved in defense and stress responsiveness
PITA_13952	CAT-box	GCCACT	604	6	+	Arabidopsis thaliana	cis-acting regulatory element related to meristem expression
PITA_13952	ARE	AAACCA	1518	6	+	Zea mays	cis-acting regulatory element essential for the anaerobic induction
PITA_13952	CCAAT-box	CAACGG	998	6	+	Hordeum vulgare	MYBHv1 binding site
PITA_13952	ABRE	ACGTG	84	5	-	Arabidopsis thaliana	cis-acting element involved in the abscisic acid responsiveness
PITA_13952	ABRE	CACGTG	1537	6	-	Arabidopsis thaliana	cis-acting element involved in the abscisic acid responsiveness
PITA_13952	ABRE	ACGTG	1538	5	+	Arabidopsis thaliana	cis-acting element involved in the abscisic acid responsiveness
PITA_14145	ACE	CTAACGTATT	1630	9	-	Petroselinum crispum	cis-acting element involved in light responsiveness
PITA_14145	TC-rich repeats	GTTTTCTTAC	1656	9	-	Nicotiana tabacum	cis-acting element involved in defense and stress responsiveness
PITA_14145	ARE	AAACCA	1566	6	+	Zea mays	cis-acting regulatory element essential for the anaerobic induction
PITA_14145	ARE	AAACCA	1662	6	+	Zea mays	cis-acting regulatory element essential for the anaerobic induction
PITA_14145	CCAAT-box	CAACGG	1560	6	-	Hordeum vulgare	MYBHv1 binding site
PITA_14145	P-box	CCTTTTG	2023	7	+	Oryza sativa	gibberellin-responsive element
PITA_14277	AT-rich element	ATAGAAATCAA	1459	10	+	Glycine max	binding site of AT-rich DNA binding protein (ATBP-1)
PITA_14277	GCN4_motif	TGAGTCA	181	7	-	Oryza sativa	cis-regulatory element involved in endosperm expression
PITA_14277	GT1-motif	GGTTAAT	1985	7	+	Avena sativa	light responsive element
PITA_14277	TGA-element	AACGAC	1798	6	-	Brassica oleracea	auxin-responsive element
PITA_14277	CGTCA-motif	CGTCA	1216	5	+	Hordeum vulgare	cis-acting regulatory element involved in the MeJA-responsiveness
PITA_14277	ABRE	ACGTG	1773	5	-	Arabidopsis thaliana	cis-acting element involved in the abscisic acid responsiveness
PITA_14277	CAT-box	GCCACT	121	6	-	Arabidopsis thaliana	cis-acting regulatory element related to meristem expression
PITA_14277	ARE	AAACCA	394	6	-	Zea mays	cis-acting regulatory element essential for the anaerobic induction
PITA_14277	ARE	AAACCA	1467	6	+	Zea mays	cis-acting regulatory element essential for the anaerobic induction
PITA_14277	MRE	AACCTAA	1597	7	+	Petroselinum crispum	MYB binding site involved in light responsiveness
PITA_14277	LTR	CCGAAA	397	6	-	Hordeum vulgare	cis-acting element involved in low-temperature responsiveness
PITA_14277	LTR	CCGAAA	1837	6	+	Hordeum vulgare	cis-acting element involved in low-temperature responsiveness
PITA_14277	TGACG-motif	TGACG	1216	5	-	Hordeum vulgare	cis-acting regulatory element involved in the MeJA-responsiveness
PITA_14277	Box 4	ATTAAT	1422	6	-	Petroselinum crispum	part of a conserved DNA module involved in light responsiveness
PITA_14277	G-box	TACGTG	1773	6	-	Arabidopsis thaliana	cis-acting regulatory element involved in light responsiveness
PITA_14277	AE-box	AGAAACAA	1567	8	+	Arabidopsis thaliana	part of a module for light response
PITA_14421	AuxRR-core	GGTCCAT	1467	7	-	Nicotiana tabacum	cis-acting regulatory element involved in auxin responsiveness
PITA_14421	O2-site	GATGATGTGG	1890	9	+	Zea mays	cis-acting regulatory element involved in zein metabolism regulation
PITA_14421	ABRE	ACGTG	910	5	-	Arabidopsis thaliana	cis-acting element involved in the abscisic acid responsiveness
PITA_14421	MBS	CAACTG	41	6	+	Arabidopsis thaliana	MYB binding site involved in drought-inducibility
PITA_14421	G-Box	CACGTT	910	6	+	Pisum sativum	cis-acting regulatory element involved in light responsiveness
PITA_14421	Gap-box	CAAATGAA(A/G)A	482	9	-	Arabidopsis thaliana	part of a light responsive element
PITA_14421	TATC-box	TATCCCA	501	7	-	Oryza sativa	cis-acting element involved in gibberellin-responsiveness
PITA_14421	P-box	CCTTTTG	987	7	-	Oryza sativa	gibberellin-responsive element
PITA_14421	P-box	CCTTTTG	1978	7	+	Oryza sativa	gibberellin-responsive element
PITA_14421	GT1-motif	GGTTAA	727	6	+	Arabidopsis thaliana	light responsive element
PITA_14421	GT1-motif	GGTTAA	1151	6	+	Arabidopsis thaliana	light responsive element
PITA_14421	G-box	TAAACGTG	910	8	-	Brassica oleracea	cis-acting regulatory element involved in light responsiveness
PITA_14421	G-box	CACGAC	1606	6	-	Zea mays	cis-acting regulatory element involved in light responsiveness
PITA_14421	G-box	CACGAC	1645	6	-	Zea mays	cis-acting regulatory element involved in light responsiveness
PITA_14421	AACA_motif	TAACAAACTCCA	647	11	-	Oryza sativa	involved in endosperm-specific negative expression
PITA_14421	ARE	AAACCA	1036	6	-	Zea mays	cis-acting regulatory element essential for the anaerobic induction
PITA_14421	ARE	AAACCA	1180	6	-	Zea mays	cis-acting regulatory element essential for the anaerobic induction
PITA_14421	ARE	AAACCA	1410	6	+	Zea mays	cis-acting regulatory element essential for the anaerobic induction
PITA_14421	ARE	AAACCA	1519	6	+	Zea mays	cis-acting regulatory element essential for the anaerobic induction
PITA_14421	ARE	AAACCA	1649	6	-	Zea mays	cis-acting regulatory element essential for the anaerobic induction
PITA_14421	ARE	AAACCA	1682	6	+	Zea mays	cis-acting regulatory element essential for the anaerobic induction
PITA_14421	Box 4	ATTAAT	67	6	+	Petroselinum crispum	part of a conserved DNA module involved in light responsiveness
PITA_14421	Box 4	ATTAAT	74	6	+	Petroselinum crispum	part of a conserved DNA module involved in light responsiveness
PITA_14421	Box 4	ATTAAT	285	6	+	Petroselinum crispum	part of a conserved DNA module involved in light responsiveness
PITA_14421	Box 4	ATTAAT	706	6	+	Petroselinum crispum	part of a conserved DNA module involved in light responsiveness
PITA_14421	Box 4	ATTAAT	1345	6	-	Petroselinum crispum	part of a conserved DNA module involved in light responsiveness
PITA_14421	Box 4	ATTAAT	1659	6	-	Petroselinum crispum	part of a conserved DNA module involved in light responsiveness
PITA_15081	TATC-box	TATCCCA	755	7	+	Oryza sativa	cis-acting element involved in gibberellin-responsiveness
PITA_15081	GC-motif	CCCCCG	1891	6	+	Zea mays	enhancer-like element involved in anoxic specific inducibility
PITA_15081	Box 4	ATTAAT	1201	6	-	Petroselinum crispum	part of a conserved DNA module involved in light responsiveness
PITA_15081	Box 4	ATTAAT	1333	6	-	Petroselinum crispum	part of a conserved DNA module involved in light responsiveness
PITA_15081	Box 4	ATTAAT	1364	6	-	Petroselinum crispum	part of a conserved DNA module involved in light responsiveness
PITA_15081	Box 4	ATTAAT	1372	6	-	Petroselinum crispum	part of a conserved DNA module involved in light responsiveness
PITA_15081	GATA-motif	GATAGGG	1070	7	+	Pisum sativum	part of a light responsive element
PITA_15081	TCA-element	CCATCTTTTT	1945	9	+	Nicotiana tabacum	cis-acting element involved in salicylic acid responsiveness
PITA_15081	ABRE	CGTACGTGCA	1700	9	-	Hordeum vulgare	cis-acting element involved in the abscisic acid responsiveness
PITA_15081	AT-rich element	ATAGAAATCAA	1835	10	+	Glycine max	binding site of AT-rich DNA binding protein (ATBP-1)
PITA_15081	ARE	AAACCA	811	6	-	Zea mays	cis-acting regulatory element essential for the anaerobic induction
PITA_15081	ARE	AAACCA	1973	6	-	Zea mays	cis-acting regulatory element essential for the anaerobic induction
PITA_15109	GCN4_motif	TGAGTCA	1122	7	-	Oryza sativa	cis-regulatory element involved in endosperm expression
PITA_15109	TCT-motif	TCTTAC	758	6	+	Arabidopsis thaliana	part of a light responsive element
PITA_15109	3-AF3 binding site	CACTATCTAAC	869	10	-	Pisum sativum	part of a conserved DNA module array (CMA3)
PITA_15109	TGA-element	AACGAC	694	6	-	Brassica oleracea	auxin-responsive element
PITA_15109	CGTCA-motif	CGTCA	470	5	-	Hordeum vulgare	cis-acting regulatory element involved in the MeJA-responsiveness
PITA_15109	ABRE	ACGTG	1611	5	+	Arabidopsis thaliana	cis-acting element involved in the abscisic acid responsiveness
PITA_15109	MBS	CAACTG	1118	6	+	Arabidopsis thaliana	MYB binding site involved in drought-inducibility
PITA_15109	ARE	AAACCA	85	6	+	Zea mays	cis-acting regulatory element essential for the anaerobic induction
PITA_15109	ARE	AAACCA	1692	6	-	Zea mays	cis-acting regulatory element essential for the anaerobic induction
PITA_15109	MRE	AACCTAA	143	7	+	Petroselinum crispum	MYB binding site involved in light responsiveness
PITA_15109	MRE	AACCTAA	795	7	-	Petroselinum crispum	MYB binding site involved in light responsiveness
PITA_15109	MRE	AACCTAA	1927	7	-	Petroselinum crispum	MYB binding site involved in light responsiveness
PITA_15109	Box 4	ATTAAT	99	6	+	Petroselinum crispum	part of a conserved DNA module involved in light responsiveness
PITA_15109	Box 4	ATTAAT	327	6	+	Petroselinum crispum	part of a conserved DNA module involved in light responsiveness
PITA_15109	circadian	CAAAGATATC	1578	9	-	Lycopersicon esculentum	cis-acting regulatory element involved in circadian control
PITA_15109	TGACG-motif	TGACG	470	5	+	Hordeum vulgare	cis-acting regulatory element involved in the MeJA-responsiveness
PITA_15109	LTR	CCGAAA	1177	6	+	Hordeum vulgare	cis-acting element involved in low-temperature responsiveness
PITA_15109	G-box	CACGAC	538	6	+	Zea mays	cis-acting regulatory element involved in light responsiveness
PITA_15109	G-box	TACGTG	1610	6	+	Arabidopsis thaliana	cis-acting regulatory element involved in light responsiveness
PITA_15245	Box II	tGTGTGGTTAATATG	158	14	-	Pisum sativum	part of a light responsive element
PITA_15245	GCN4_motif	TGAGTCA	1032	7	-	Oryza sativa	cis-regulatory element involved in endosperm expression
PITA_15245	AT-rich element	ATAGAAATCAA	1256	10	+	Glycine max	binding site of AT-rich DNA binding protein (ATBP-1)
PITA_15245	GT1-motif	GGTTAA	162	6	-	Arabidopsis thaliana	light responsive element
PITA_15245	chs-CMA1a	TTACTTAA	211	8	+	Daucus carota	part of a light responsive element
PITA_15245	ACA-motif	AATCACAACCATA	1795	13	+	Arabidopsis thaliana	part of gapA in (gapA-CMA1) involved with light responsiveness
PITA_15245	Gap-box	CAAATGAA(A/G)A	1858	9.5	-	Arabidopsis thaliana	part of a light responsive element
PITA_15245	ABRE	AACCCGG	940	7	+	Arabidopsis thaliana	cis-acting element involved in the abscisic acid responsiveness
PITA_15245	ABRE	ACGTG	1414	5	-	Arabidopsis thaliana	cis-acting element involved in the abscisic acid responsiveness
PITA_15245	ABRE	ACGTG	1564	5	-	Arabidopsis thaliana	cis-acting element involved in the abscisic acid responsiveness
PITA_15245	ABRE	ACGTG	1608	5	-	Arabidopsis thaliana	cis-acting element involved in the abscisic acid responsiveness
PITA_15245	ABRE	ACGTG	1652	5	-	Arabidopsis thaliana	cis-acting element involved in the abscisic acid responsiveness
PITA_15245	CCAAT-box	CAACGG	960	6	-	Hordeum vulgare	MYBHv1 binding site
PITA_15245	ARE	AAACCA	1332	6	+	Zea mays	cis-acting regulatory element essential for the anaerobic induction
PITA_15245	TGA-element	AACGAC	1995	6	-	Brassica oleracea	auxin-responsive element
PITA_15245	CGTCA-motif	CGTCA	1491	5	+	Hordeum vulgare	cis-acting regulatory element involved in the MeJA-responsiveness
PITA_15245	ACE	CTAACGTATT	925	9	-	Petroselinum crispum	cis-acting element involved in light responsiveness
PITA_15245	TGACG-motif	TGACG	1491	5	-	Hordeum vulgare	cis-acting regulatory element involved in the MeJA-responsiveness
PITA_15245	G-Box	CACGTT	1414	6	+	Pisum sativum	cis-acting regulatory element involved in light responsiveness
PITA_15245	G-Box	CACGTT	1564	6	+	Pisum sativum	cis-acting regulatory element involved in light responsiveness
PITA_15245	G-Box	CACGTT	1608	6	+	Pisum sativum	cis-acting regulatory element involved in light responsiveness
PITA_15245	G-Box	CACGTT	1652	6	+	Pisum sativum	cis-acting regulatory element involved in light responsiveness
PITA_15348	I-box	AAGATAAGGCT	428	10	+	Gossypium hirsutum	part of a light responsive element
PITA_15348	GT1-motif	GGTTAA	950	6	+	Arabidopsis thaliana	light responsive element
PITA_15348	O2-site	GATGACATGG	339	9	-	Zea mays	cis-acting regulatory element involved in zein metabolism regulation
PITA_15348	A-box	CCGTCC	248	6	+	Petroselinum crispum	cis-acting regulatory element
PITA_15348	GARE-motif	TCTGTTG	1865	7	-	Brassica oleracea	gibberellin-responsive element
PITA_15348	CAT-box	GCCACT	237	6	+	Arabidopsis thaliana	cis-acting regulatory element related to meristem expression
PITA_15348	ARE	AAACCA	1765	6	-	Zea mays	cis-acting regulatory element essential for the anaerobic induction
PITA_15348	MBS	CAACTG	625	6	+	Arabidopsis thaliana	MYB binding site involved in drought-inducibility
PITA_15348	MBS	CAACTG	1997	6	-	Arabidopsis thaliana	MYB binding site involved in drought-inducibility
PITA_15348	ATC-motif	AGTAATCT	1346	8	+	Spinacia oleracea	part of a conserved DNA module involved in light responsiveness
PITA_15348	TGA-element	AACGAC	868	6	+	Brassica oleracea	auxin-responsive element
PITA_15348	P-box	CCTTTTG	2012	7	-	Oryza sativa	gibberellin-responsive element
PITA_15348	AE-box	AGAAACAA	986	8	+	Arabidopsis thaliana	part of a module for light response
PITA_15348	AuxRR-core	GGTCCAT	1750	7	+	Nicotiana tabacum	cis-acting regulatory element involved in auxin responsiveness
PITA_15348	Box 4	ATTAAT	1095	6	-	Petroselinum crispum	part of a conserved DNA module involved in light responsiveness
PITA_15348	Box 4	ATTAAT	1244	6	-	Petroselinum crispum	part of a conserved DNA module involved in light responsiveness
PITA_15348	Box 4	ATTAAT	1277	6	-	Petroselinum crispum	part of a conserved DNA module involved in light responsiveness
PITA_15348	Box 4	ATTAAT	1686	6	-	Petroselinum crispum	part of a conserved DNA module involved in light responsiveness
PITA_15348	Box 4	ATTAAT	1801	6	-	Petroselinum crispum	part of a conserved DNA module involved in light responsiveness
PITA_15348	TCCC-motif	TCTCCCT	1509	7	-	Spinacia oleracea	part of a light responsive element
PITA_15381	TCT-motif	TCTTAC	515	6	+	Arabidopsis thaliana	part of a light responsive element
PITA_15381	TCT-motif	TCTTAC	1945	6	+	Arabidopsis thaliana	part of a light responsive element
PITA_15381	Gap-box	CAAATGAA(A/G)A	641	9	-	Arabidopsis thaliana	part of a light responsive element
PITA_15381	A-box	CCGTCC	1728	6	-	Petroselinum crispum	cis-acting regulatory element
PITA_15381	GT1-motif	GGTTAAT	1139	7	+	Avena sativa	light responsive element
PITA_15381	O2-site	GATGA(C/T)(A/G)TG(A/G)	1054	8	+	Zea mays	cis-acting regulatory element involved in zein metabolism regulation
PITA_15381	O2-site	GATGATGTGG	1711	9	+	Zea mays	cis-acting regulatory element involved in zein metabolism regulation
PITA_15381	I-box	cCATATCCAAT	586	10	-	Flaveria trinervia	part of a light responsive element
PITA_15381	I-box	gGATAAGGTG	589	9	+	Zea mays	part of a light responsive element
PITA_15381	Box 4	ATTAAT	167	6	+	Petroselinum crispum	part of a conserved DNA module involved in light responsiveness
PITA_15381	Box 4	ATTAAT	504	6	+	Petroselinum crispum	part of a conserved DNA module involved in light responsiveness
PITA_15381	Box 4	ATTAAT	825	6	+	Petroselinum crispum	part of a conserved DNA module involved in light responsiveness
PITA_15381	Box 4	ATTAAT	1033	6	-	Petroselinum crispum	part of a conserved DNA module involved in light responsiveness
PITA_15381	Box 4	ATTAAT	1096	6	-	Petroselinum crispum	part of a conserved DNA module involved in light responsiveness
PITA_15381	Box 4	ATTAAT	1182	6	-	Petroselinum crispum	part of a conserved DNA module involved in light responsiveness
PITA_15381	TGACG-motif	TGACG	1424	5	+	Hordeum vulgare	cis-acting regulatory element involved in the MeJA-responsiveness
PITA_15381	LAMP-element	CCTTATCCA	588	9	-	Spinacia oleracea	part of a light responsive element
PITA_15381	AuxRR-core	GGTCCAT	1570	7	-	Nicotiana tabacum	cis-acting regulatory element involved in auxin responsiveness
PITA_15381	G-box	TACGTG	147	6	-	Arabidopsis thaliana	cis-acting regulatory element involved in light responsiveness
PITA_15381	CGTCA-motif	CGTCA	1424	5	-	Hordeum vulgare	cis-acting regulatory element involved in the MeJA-responsiveness
PITA_15381	ATCT-motif	AATCTAATCC	601	9	-	Pisum sativum	part of a conserved DNA module involved in light responsiveness
PITA_15381	P-box	CCTTTTG	351	7	-	Oryza sativa	gibberellin-responsive element
PITA_15381	ARE	AAACCA	901	6	+	Zea mays	cis-acting regulatory element essential for the anaerobic induction
PITA_15381	ARE	AAACCA	1000	6	+	Zea mays	cis-acting regulatory element essential for the anaerobic induction
PITA_15381	ARE	AAACCA	1867	6	-	Zea mays	cis-acting regulatory element essential for the anaerobic induction
PITA_15381	ABRE	ACGTG	147	5	-	Arabidopsis thaliana	cis-acting element involved in the abscisic acid responsiveness
PITA_15448	AE-box	AGAAACAA	527	8	+	Arabidopsis thaliana	part of a module for light response
PITA_15448	LAMP-element	CTTTATCA	838	8	+	Pisum sativum	part of a light responsive element
PITA_15448	LTR	CCGAAA	1442	6	-	Hordeum vulgare	cis-acting element involved in low-temperature responsiveness
PITA_15448	Box 4	ATTAAT	150	6	+	Petroselinum crispum	part of a conserved DNA module involved in light responsiveness
PITA_15448	Box 4	ATTAAT	713	6	+	Petroselinum crispum	part of a conserved DNA module involved in light responsiveness
PITA_15448	Box 4	ATTAAT	717	6	+	Petroselinum crispum	part of a conserved DNA module involved in light responsiveness
PITA_15448	Box 4	ATTAAT	740	6	+	Petroselinum crispum	part of a conserved DNA module involved in light responsiveness
PITA_15448	Box 4	ATTAAT	744	6	+	Petroselinum crispum	part of a conserved DNA module involved in light responsiveness
[truncated: 5,330 more rows]

## Sheet: Sheet2
Table S2: The information of cis-elements of AP2/ERF gene in loblloly pine.
Cis-element	Type	Notes	Number
3-AF1 binding site	Light responsiveness	Light responsive element	10
AAAC-motif	Light responsiveness	Light responsive element	6
A-box	Light responsiveness	sequence conserved in alpha-amylase promoters	75
ACA-motif	Light responsiveness	part of gapA in (gapA-CMA1) involved with light responsiveness	4
ACE	Light responsiveness	Light responsive element	37
AE-box	Light responsiveness	part of a light responsive element	70
AT1-motif	Light responsiveness	part of a light responsive element	54
ATC-motif	Light responsiveness	part of a conserved DNA module involved in light responsiveness	14
ATCT-motif	Light responsiveness	part of a conserved DNA module involved in light responsiveness	63
Box 4	Light responsiveness	part of a conserved DNA module involved in light responsiveness	964
Box II	Light responsiveness	part of a light responsive element	26
CAG-motif	Light responsiveness	part of a light responsive element	5
chs-CMA2a	Light responsiveness	part of a light responsive element	14
chs-CMA2c	Light responsiveness	part of a light responsive element	1
chs-Unit 1 m1	Light responsiveness	part of a light responsive element	1
GA-motif	Light responsiveness	part of a light responsive element	61
GA-motif	Light responsiveness	part of a light responsive element	10
Gap-box	Light responsiveness	part of a light responsive element	35
GATA-motif	Light responsiveness	part of a light responsive element	150
GATT-motif	Light responsiveness	part of a light responsive element	1
G-Box	Light responsiveness	Light responsive element	290
GT1-motif	Light responsiveness	Light responsive element	419
GTGGC-motif	Light responsiveness	part of a light responsive element	10
I-box	Light responsiveness	part of a light responsive element	123
LAMP-element	Light responsiveness	part of a light responsive element	35
L-box	Light responsiveness	part of a light responsive element	5
LS7	Light responsiveness	part of a light responsive element	3
MRE	Light responsiveness	MYB binding site involved in light responsiveness	131
Pc-CMA2a	Light responsiveness	part of a light responsive element	1
Pc-CMA2c	Light responsiveness	part of a light responsive element	1
sbp-CMA1c	Light responsiveness	part of a light responsive element	2
Sp1	Light responsiveness	Light responsive element	49
TCCC-motif	Light responsiveness	part of a light responsive element	57
TCT-motif	Light responsiveness	part of a light responsive element	227
TGGCA	Light responsiveness	part of a light responsive element	2
AAGAA-motif	Phytohormone response	abscisic acid responsive element	242
ABRE	Phytohormone response	abscisic acid responsive element	520
AuxRE	Phytohormone response	Auxin responsive element	24
AuxRR-core	Phytohormone response	Auxin responsive element	65
CGTCA-motif	Phytohormone response	MeJA responsive element	383
chs-CMA1a	Phytohormone response	MeJA responsive element	55
ERE	Phytohormone response	Ethylene responsive element	508
GARE-motif	Phytohormone response	Gibberellin responsive element	74
P-box	Phytohormone response	Gibberellin responsive element	107
SARE	Phytohormone response	Salicylic acid responsive element	2
TATC-box	Phytohormone response	Gibberellin responsive element	98
TCA	Phytohormone response	Salicylic acid responsive element	174
TCA-element	Phytohormone response	Salicylic acid responsive element	135
TGA-box	Phytohormone response	Auxin responsive element	4
TGACG-motif	Phytohormone response	MeJA responsive element	383
TGA-element	Phytohormone response	MeJA responsive element	105
ARE	Stress induction	Anaerobic induction	821
AT-rich sequence	Stress induction	Elicitor-mediated activation	28
DRE	Stress induction	Salt stresses responsive element	2
GC-motif	Stress induction	Anoxic specific inducibility	45
LTR	Stress induction	Low temperature responsiveness	127
MBS	Stress induction	Drought inducibility	228
TC-rich repeats	Stress induction	Defense and stress responsiveness	161
W box	Stress induction	Damage responsive element	293
WUN-motif	Stress induction	Wound-responsive element	163
AACA_motif	plant growth and development	Endosperm expression	70
CAT-box	plant growth and development	Meristem expression	128
circadian	plant growth and development	Circadian control	60
HD-Zip 1	Plant growth and development	Differentiation of the palisade mesophyll cells	10
MBSI	plant growth and development	Flavonoid biosynthetic genes regulation	16
MSA-like	plant growth and development	Cell cycle regulation	15
O2-site	plant growth and development	Zein metabolism regulation	127
RY-element	plant growth and development	Seed-specific regulation	18
