# Supplementary material for: Genome-wide identification and characterization of the AP2/ERF gene family in loblolly pine (Pinus taeda L.)
Source: PeerJ. 2024 May 21;12:e17388. doi: 10.7717/peerj.17388 (PMC11122039; doi:10.7717/peerj.17388)
Supplement: Supplemental Information 7 [file peerj-12-17388-s007.xlsx]

## Sheet: Relative expression
Gene Name：PITA_03224								Gene Name：PITA_25673
	Sample Name								Sample Name
	CK1	Injury	CK2	Eth	CK3	MeJA			CK1	Injury	CK2	Eth	CK3	MeJA
1	0.829164	0.694973	0.837809	0.370206	1.06914	5.92591		1	1.24118	1.11057	0.776529	3.17089	1.00672	11.9772
2	1.32876	0.870087	1.20971	0.382759	0.905519	7.23855		2	1.01709	1.00954	0.961468	5.25303	0.945114	3.5336
3	0.907641	1.03668	0.986672	0.444906	1.03292	6.14268		3	0.792146	1.14977	1.33939	5.74864	1.05101	3.40531
mean	1.02185	0.867247	1.0114	0.399293	1.00267	6.436		mean	1.01681	1.08996	1.0258	4.72419	1.00095	6.30536
SE	0.155115	0.0986531	0.108068	0.0230943	0.049438	0.406357		SE	0.129624	0.0417714	0.165637	0.789717	0.0358124	2.83615
Gene Name：PPITA_06992								Gene Name：PITA_26508
	Sample Name								Sample Name
	CK1	Injury	CK2	Eth	CK3	MeJA			CK1	Injury	CK2	Eth	CK3	MeJA
1	0.73297	0.984635	1.19496	2.59419	1.01761	3.26167		1	0.834124	0.68347	0.991465	1.59684	1.21156	2.0853
2	1.34907	0.454364	0.600627	3.30927	0.923769	4.85392		2	0.994751	0.481048	1.29778	1.4553	1.12254	2.58665
3	1.0113	0.859048	1.39329	3.00669	1.06379	1.13069		3	1.20519	0.408716	0.777179	0.84432	0.735278	1.71113
mean	1.03111	0.766016	1.06296	2.97005	1.002	3.08233		mean	1.01135	0.5244	1.02214	1.29882	1.02333	2.12767
SE	0.178127	0.159988	0.238151	0.207236	0.0411987	1.07849		SE	0.111714	0.0822424	0.151065	0.230894	0.146438	0.253778
Gene Name：PITA_08629								Gene Name：PITA_29504
	Sample Name								Sample Name
	CK1	Injury	CK2	Eth	CK3	MeJA			CK1	Injury	CK2	Eth	CK3	MeJA
1	1.08557	1.92815	0.634498	3.09579	1.17018	2.18591		1	0.894237	0.980573	0.751129	0.230108	1.04712	4.97074
2	1.3341	3.65863	1.07963	5.99861	0.760238	5.37148		2	1.06933	0.627203	1.20027	0.345598	1.17351	10.0954
3	0.690485	1.94567	1.4598	3.16154	1.12408	3.82145		3	1.04577	1.09559	1.10919	0.255159	0.8138	2.99494
mean	1.03672	2.51082	1.05798	4.08531	1.01817	3.79295		mean	1.00311	0.901123	1.0202	0.276957	1.01167	6.02033
SE	0.187394	0.573929	0.238491	0.956838	0.129648	0.919705		SE	0.0548608	0.140928	0.137078	0.0350752	0.105414	2.11568
Gene Name：PITA_23504								Gene Name：PITA_42370
	Sample Name								Sample Name
	CK1	Injury	CK2	Eth	CK3	MeJA			CK1	Injury	CK2	Eth	CK3	MeJA
1	1.03747	0.815361	0.904959	0.428057	0.750225	2.25687		1	1.07076	1.04474	1.2656	2.60442	0.85591	1.1351
2	1.11936	0.756825	0.979744	0.501392	1.03846	2.93199		2	1.04469	1.04897	0.700712	5.07047	1.37972	3.01814
3	0.861101	0.745947	1.12787	0.419397	1.3409	1.65277		3	0.893963	0.808213	1.12763	3.00989	0.846802	1.97793
mean	1.00598	0.772711	1.0042	0.449633	1.04319	2.28054		mean	1.00314	0.967309	1.03131	3.56159	1.02767	2.04367
SE	0.0761982	0.021555	0.0655014	0.0260049	0.170529	0.369469		SE	0.0551042	0.0795575	0.17003	0.763463	0.176186	0.544566
Gene Name：PITA_24252								Gene Name：PITA_45859
	Sample Name								Sample Name
	CK1	Injury	CK2	Eth	CK3	MeJA			CK1	Injury	CK2	Eth	CK3	MeJA
1	1.30553	1.41116	0.908478	0.538784	0.887315	3.93246		1	1.16522	0.478733	1.00097	1.79143	0.885992	0.176796
2	0.925891	1.13325	0.832631	0.660497	1.13842	2.59235		2	1.03426	0.855338	1.11705	2.70195	1.23955	0.38933
3	0.827285	0.966019	1.322	0.809207	0.989963	2.76575		3	0.829775	0.586895	0.89435	3.93608	0.910556	0.337467
mean	1.01957	1.17014	1.02104	0.669497	1.005	3.09667		mean	1.00975	0.64032	1.00412	2.80982	1.00321	0.315948
SE	0.145785	0.129818	0.152066	0.0781959	0.0728446	0.420676		SE	0.0976054	0.111952	0.0643066	0.621451	0.118173	0.0696105

## Sheet: Raw data
Sample Name	Gene Name	Ct	Ct	Ct	Actin Ct	Actin Ct	Actin Ct	Ct Mean	Actin Ct Mean	△Ct	△Ct Mean	△△Ct	2-△△Ct
CK3-1	PITA_03224	26.8278	26.9102	27.0024	25.1233	25.0975	25.0475	26.9135	25.0894	1.82406	1.92052	-0.0964562	1.06914
CK3-2	PITA_03224	27.5325	27.3643	26.8884	25.0366	25.2744	25.283	27.2617	25.198	2.0637	1.92052	0.143182	0.905519
CK3-3	PITA_03224	27.4824	26.9621	27.1776	25.3198	25.1374	25.5436	27.2074	25.3336	1.87379	1.92052	-0.0467262	1.03292
MeJA-1	PITA_03224	26.1916	25.544	26.0063	26.8496	26.2091	26.6228	25.914	26.5605	-0.646518	1.92052	-2.56704	5.92591
MeJA-2	PITA_03224	25.336	24.9776	25.3002	26.3595	26.3817	25.6781	25.2046	26.1398	-0.935181	1.92052	-2.8557	7.23855
MeJA-3	PITA_03224	26.5091	26.2869	26.9869	27.1891	27.4055	27.2834	26.5943	27.2927	-0.698348	1.92052	-2.61887	6.14268
CK1-1	PITA_03224	29.1055	28.8632	28.8988	27.3476	27.8497	27.4044	28.9558	27.5339	1.42191	1.15164	0.270271	0.829164
CK1-2	PITA_03224	28.7915	28.4479	28.6783	28.0045	27.765	27.9235	28.6392	27.8977	0.741562	1.15164	-0.410078	1.32876
CK1-3	PITA_03224	27.4566	27.4144	27.4926	26.1661	26.0882	26.235	27.4545	26.1631	1.29145	1.15164	0.139807	0.907641
Injury-1	PITA_03224	29.4709	29.5677	29.7202	27.9012	27.9306	27.8972	29.5863	27.9097	1.67661	1.15164	0.524972	0.694973
Injury-2	PITA_03224	29.2956	29.1989	29.3771	28.1848	27.5592	28.0703	29.2905	27.9381	1.35241	1.15164	0.200769	0.870087
Injury-3	PITA_03224	28.4775	28.7298	28.8668	27.4277	27.5011	27.8464	28.6914	27.5917	1.09967	1.15164	-0.051974	1.03668
CK2-1	PITA_03224	25.2966	25.2789	25.1618	25.5582	25.5318	25.6787	25.2457	25.5895	-0.343791	-0.599098	0.255306	0.837809
CK2-2	PITA_03224	25.5922	25.4901	25.5211	26.446	26.3587	26.4199	25.5345	26.4082	-0.873762	-0.599098	-0.274664	1.20971
CK2-3	PITA_03224	26.577	26.6713	26.3223	27.1013	27.0504	27.1581	26.5235	27.1033	-0.57974	-0.599098	0.0193576	0.986672
Eth-1	PITA_03224	27.7114	27.76	28.0419	26.8437	27.0313	27.1347	27.8378	27.0033	0.834502	-0.599098	1.4336	0.370206
Eth-2	PITA_03224	28.0613	27.7313	28.0169	27.1258	27.14	27.1846	27.9365	27.1501	0.786394	-0.599098	1.38549	0.382759
Eth-3	PITA_03224	28.9377	28.899	28.8761	28.39	28.3381	28.2767	28.9043	28.335	0.56933	-0.599098	1.16843	0.444906
CK2-1	PITA_06992	29.498	29.6113	29.3092	28.6369	28.7826	28.8247	29.4728	28.7481	0.724756	0.981718	-0.256963	1.19496
CK2-2	PITA_06992	29.899	29.9972	30.0804	28.0111	28.2477	28.5662	29.9922	28.275	1.71718	0.981718	0.735459	0.600627
CK2-3	PITA_06992	28.8324	29.1608	29.4125	28.5232	28.5445	28.8284	29.1352	28.632	0.503221	0.981718	-0.478497	1.39329
Eth-1	PITA_06992	28.4122	28.3902	28.1119	28.6453	28.8558	28.5939	28.3048	28.6983	-0.393568	0.981718	-1.37529	2.59419
Eth-2	PITA_06992	28.2018	28.2372	27.4154	28.9166	28.8195	28.3526	27.9514	28.6962	-0.744795	0.981718	-1.72651	3.30927
Eth-3	PITA_06992	27.3067	27.378	27.7285	28.0533	28.0933	28.086	27.4711	28.0775	-0.606457	0.981718	-1.58818	3.00669
CK1-1	PITA_06992	30.2177	30.1778	29.8781	26.4766	26.5949	26.5078	30.0912	26.5264	3.56476	3.11658	0.448174	0.73297
CK1-2	PITA_06992	30.2645	30.3466	29.9683	27.512	27.4275	27.586	30.1931	27.5085	2.68462	3.11658	-0.43196	1.34907
CK1-3	PITA_06992	29.5099	29.8181	29.5802	26.6313	26.4428	26.5329	29.636	26.5357	3.10037	3.11658	-0.0162136	1.0113
Injury-1	PITA_06992	30.6277	30.3757	30.3059	27.6191	27.3326	26.9408	30.4364	27.2975	3.13892	3.11658	0.0223395	0.984635
Injury-2	PITA_06992	31.4627	31.8564	30.9572	26.7064	27.2399	27.566	31.4254	27.1708	4.25466	3.11658	1.13808	0.454364
Injury-3	PITA_06992	30.6511	30.2299	30.5571	27.0982	27.2136	27.1189	30.4794	27.1436	3.33577	3.11658	0.219189	0.859048
CK3-1	PITA_06992	28.7548	28.5656	28.5323	27.7219	27.5571	27.8168	28.6176	27.6986	0.918977	0.944163	-0.0251854	1.01761
CK3-2	PITA_06992	29.261	29.1163	28.7548	27.9274	28.065	27.9639	29.044	27.9854	1.05856	0.944163	0.114396	0.923769
CK3-3	PITA_06992	29.5828	29.5117	29.6601	28.6928	28.6285	28.8685	29.5849	28.7299	0.854953	0.944163	-0.0892104	1.06379
MeJA-1	PITA_06992	27.0973	27.3177	27.1918	27.9031	28.0084	27.9795	27.2022	27.9637	-0.761447	0.944163	-1.70561	3.26167
MeJA-2	PITA_06992	27.0874	27.0438	26.8102	28.4215	28.2796	28.2453	26.9805	28.3154	-1.33499	0.944163	-2.27915	4.85392
MeJA-3	PITA_06992	28.4663	28.1195	28.2265	27.5191	27.4638	27.5285	28.2707	27.5038	0.766953	0.944163	-0.17721	1.13069
CK1-1	PITA_08629	25.6776	25.7405	25.7359	26.4766	26.5949	26.5078	25.718	26.5264	-0.808436	-0.689983	-0.118453	1.08557
CK1-2	PITA_08629	25.5294	25.427	25.333	26.6313	26.4428	26.5329	25.4298	26.5357	-1.10585	-0.689983	-0.415864	1.3341
CK1-3	PITA_08629	27.5312	27.7624	27.9465	27.8688	27.5477	28.2906	27.7467	27.9024	-0.155665	-0.689983	0.534317	0.690485
Injury-1	PITA_08629	26.9449	26.2089	26.3977	28.3573	28.4769	27.6289	26.5172	28.1544	-1.6372	-0.689983	-0.947214	1.92815
Injury-2	PITA_08629	25.4305	25.4676	25.4675	28.1568	28.0718	27.8209	25.4552	28.0165	-2.56129	-0.689983	-1.8713	3.65863
Injury-3	PITA_08629	25.3999	25.5868	25.4933	27.0982	27.2136	27.1189	25.4933	27.1436	-1.65025	-0.689983	-0.960268	1.94567
CK2-1	PITA_08629	27.482	27.6047	27.2834	27.4521	27.5035	27.6029	27.4567	27.5195	-0.0628007	-0.719112	0.656311	0.634498
CK2-2	PITA_08629	28.0436	27.8033	27.9084	28.6369	28.7826	28.8247	27.9184	28.7481	-0.82965	-0.719112	-0.110538	1.07963
CK2-3	PITA_08629	27.3919	27.0103	26.6282	28.0111	28.2477	28.5662	27.0101	28.275	-1.26489	-0.719112	-0.545774	1.4598
Eth-1	PITA_08629	26.2877	26.2997	26.4593	28.6453	28.8558	28.5939	26.3489	28.6983	-2.34942	-0.719112	-1.63031	3.09579
Eth-2	PITA_08629	25.3393	25.5377	25.3005	28.9166	28.8195	28.3526	25.3925	28.6962	-3.30374	-0.719112	-2.58463	5.99861
Eth-3	PITA_08629	25.5816	25.8311	26.0198	28.1038	28.3778	28.0901	25.8108	28.1906	-2.37974	-0.719112	-1.66063	3.16154
CK3-1	PITA_08629	23.8796	23.9134	24.0894	27.3829	27.2415	27.4719	23.9608	27.3654	-3.40463	-3.1779	-0.226731	1.17018
CK3-2	PITA_08629	24.4952	24.5092	24.5932	27.2702	27.3141	27.3605	24.5325	27.315	-2.78243	-3.1779	0.395477	0.760238
CK3-3	PITA_08629	24.3085	24.3526	24.6989	27.6464	27.9157	27.8378	24.4533	27.8	-3.34665	-3.1779	-0.168746	1.12408
MeJA-1	PITA_08629	23.341	23.4048	23.2772	27.5607	27.7336	27.6472	23.341	27.6472	-4.30614	-3.1779	-1.12824	2.18591
MeJA-2	PITA_08629	22.1965	22.2172	22.1758	27.7949	27.8045	27.7997	22.1965	27.7997	-5.60322	-3.1779	-2.42532	5.37148
MeJA-3	PITA_08629	22.8147	22.8302	22.7992	27.8069	28.0465	27.9267	22.8147	27.9267	-5.11202	-3.1779	-1.93412	3.82145
CK1-1	PITA_23504	26.1315	26.384	25.9978	27.0441	26.9867	26.9038	26.1711	26.9782	-0.807105	-0.754037	-0.0530679	1.03747
CK1-2	PITA_23504	26.2683	26.3313	26.1395	27.1661	27.0882	27.235	26.2464	27.1631	-0.916714	-0.754037	-0.162677	1.11936
CK1-3	PITA_23504	26.7545	26.6991	27.0469	27.3612	27.1281	27.626	26.8335	27.3718	-0.538292	-0.754037	0.215745	0.861101
Injury-1	PITA_23504	26.678	26.7556	26.7095	27.2207	27.0449	27.2562	26.7144	27.1739	-0.459549	-0.754037	0.294488	0.815361
Injury-2	PITA_23504	26.5265	26.478	26.6683	26.9012	26.9306	26.8972	26.5576	26.9097	-0.35207	-0.754037	0.401968	0.756825
Injury-3	PITA_23504	27.2399	27.0486	27.4931	27.4277	27.5011	27.8464	27.2605	27.5917	-0.331182	-0.754037	0.422856	0.745947
CK2-1	PITA_23504	23.9106	23.8248	23.9568	25.5582	25.5318	25.6787	23.8974	25.5895	-1.69211	-1.83619	0.144076	0.904959
CK2-2	PITA_23504	24.6173	24.5947	24.5926	26.446	26.3587	26.4199	24.6016	26.4082	-1.80667	-1.83619	0.0295229	0.979744
CK2-3	PITA_23504	25.0321	25.2093	25.0391	27.1013	27.0504	27.1581	25.0935	27.1033	-2.00979	-1.83619	-0.173599	1.12787
Eth-1	PITA_23504	27.4337	27.2995	27.4404	27.8437	28.0313	28.1347	27.3912	28.0033	-0.612062	-1.83619	1.22413	0.428057
Eth-2	PITA_23504	27.6038	27.4701	27.4104	28.39	28.3381	28.2767	27.4948	28.335	-0.840198	-1.83619	0.99599	0.501392
Eth-3	PITA_23504	27.3621	27.4592	27.4146	28.0328	27.8856	28.0651	27.412	27.9945	-0.582578	-1.83619	1.25361	0.419397
CK3-1	PITA_23504	28.0611	27.9448	27.787	27.2702	27.3141	27.3605	27.931	27.315	0.616014	0.201409	0.414604	0.750225
CK3-2	PITA_23504	28.6664	28.4695	28.5466	28.4278	28.4448	28.369	28.5608	28.4139	0.146966	0.201409	-0.0544435	1.03846
CK3-3	PITA_23504	27.66	27.7044	27.3702	27.6464	27.9157	27.8378	27.5782	27.8	-0.221791	0.201409	-0.423201	1.3409
MeJA-1	PITA_23504	27.4304	27.4204	27.4824	28.4285	28.4025	28.421	27.4444	28.4173	-0.972914	0.201409	-1.17432	2.25687
MeJA-2	PITA_23504	26.1781	26.0421	26.0348	27.4781	27.4008	27.4275	26.085	27.4355	-1.35047	0.201409	-1.55188	2.93199
MeJA-3	PITA_23504	28.1738	28.2981	28.087	28.574	28.9733	28.582	28.1863	28.7098	-0.523473	0.201409	-0.724882	1.65277
CK1-1	PITA_24252	29.0751	28.7135	29.0325	27.0958	27.1428	27.135	28.9404	27.1245	1.81584	2.20047	-0.384631	1.30553
CK1-2	PITA_24252	30.1408	29.8183	29.6427	27.5245	27.5062	27.6365	29.8673	27.5557	2.31156	2.20047	0.111086	0.925891
CK1-3	PITA_24252	29.7598	29.6293	29.3034	27.0541	27.0063	27.21	29.5642	27.0901	2.47402	2.20047	0.273544	0.827285
Injury-1	PITA_24252	28.5962	28.3707	28.4804	26.9559	26.9059	26.4746	28.4824	26.7788	1.70359	2.20047	-0.496879	1.41116
Injury-2	PITA_24252	28.8294	29.1633	28.6247	27.0315	26.7721	26.7538	28.8725	26.8525	2.02001	2.20047	-0.180466	1.13325
Injury-3	PITA_24252	30.0419	30.498	29.7179	27.7531	27.676	28.0777	30.086	27.8356	2.25035	2.20047	0.0498759	0.966019
CK2-1	PITA_24252	26.7565	26.4116	26.4356	25.142	25.0752	25.197	26.5346	25.1381	1.39645	1.25798	0.138477	0.908478
CK2-2	PITA_24252	26.7626	27.1132	26.9622	25.4324	25.5058	25.3332	26.946	25.4238	1.52223	1.25798	0.26425	0.832631
CK2-3	PITA_24252	27.1967	27.3341	27.0496	26.4418	26.4163	26.1565	27.1935	26.3382	0.855249	1.25798	-0.402728	1.322
Eth-1	PITA_24252	29.2328	29.0665	29.1611	26.8437	27.0313	27.1347	29.1535	27.0033	2.1502	1.25798	0.892221	0.538784
Eth-2	PITA_24252	28.9858	29.0933	28.9403	27.1258	27.14	27.1846	29.0065	27.1501	1.85635	1.25798	0.598376	0.660497
Eth-3	PITA_24252	29.4325	29.6346	29.1279	27.89	27.8381	27.7767	29.3984	27.835	1.5634	1.25798	0.305419	0.809207
CK3-1	PITA_24252	29.1712	28.2715	28.9583	26.8434	27.0847	26.9744	28.8003	26.9675	1.83282	1.66034	0.172482	0.887315
CK3-2	PITA_24252	29.1546	28.9966	28.7726	27.5968	27.4299	27.4771	28.9746	27.5013	1.4733	1.66034	-0.187036	1.13842
CK3-3	PITA_24252	28.7257	29.0819	29.2178	27.3198	27.1374	27.5436	29.0085	27.3336	1.67489	1.66034	0.0145536	0.989963
MeJA-1	PITA_24252	27.3571	27.0878	27.2913	27.8496	27.2091	27.6228	27.2454	27.5605	-0.315093	1.66034	-1.97543	3.93246
MeJA-2	PITA_24252	27.3369	27.074	27.8667	27.3595	27.3817	26.6781	27.4258	27.1398	0.286079	1.66034	-1.37426	2.59235
MeJA-3	PITA_24252	27.5665	27.7283	28.6612	27.6891	27.9055	27.7834	27.9853	27.7927	0.192666	1.66034	-1.46767	2.76575
CK1-1	PITA_25673	26.6753	26.7716	26.5294	27.0958	27.1428	27.135	26.6587	27.1245	-0.465802	-0.154092	-0.31171	1.24118
CK1-2	PITA_25673	26.9063	27.0554	26.773	27.0541	27.0063	27.21	26.9116	27.0901	-0.178543	-0.154092	-0.024451	1.01709
CK1-3	PITA_25673	27.8617	27.4551	27.8304	27.388	27.6874	27.5256	27.7157	27.5336	0.182069	-0.154092	0.336161	0.792146
Injury-1	PITA_25673	27.4561	27.5576	27.4066	27.9559	27.9059	27.4746	27.4734	27.7788	-0.305396	-0.154092	-0.151304	1.11057
Injury-2	PITA_25673	27.67	27.6045	27.7795	28.0315	27.7721	27.7538	27.6847	27.8525	-0.167797	-0.154092	-0.0137043	1.00954
Injury-3	PITA_25673	27.5345	27.2549	27.6511	27.7531	27.676	28.0777	27.4802	27.8356	-0.35544	-0.154092	-0.201348	1.14977
CK2-1	PITA_25673	26.6058	26.272	26.3721	27.3639	27.3067	27.0546	26.4166	27.2417	-0.82513	-1.19002	0.364888	0.776529
CK2-2	PITA_25673	27.1355	26.8738	26.392	28.0081	27.7252	28.0679	26.8004	27.9337	-1.13333	-1.19002	0.0566886	0.961468
CK2-3	PITA_25673	25.9655	25.9129	26.4577	27.5695	27.7929	27.8086	26.1121	27.7237	-1.61159	-1.19002	-0.421577	1.33939
Eth-1	PITA_25673	25.2184	24.8804	24.9409	28.094	28.0307	27.4797	25.0133	27.8682	-2.85491	-1.19002	-1.66489	3.17089
Eth-2	PITA_25673	24.3594	24.2937	24.3079	27.9424	28.0872	27.6809	24.3203	27.9035	-3.58317	-1.19002	-2.39315	5.25303
Eth-3	PITA_25673	24.2255	24.2874	24.258	28.1387	28.0877	27.6843	24.257	27.9702	-3.71324	-1.19002	-2.52322	5.74864
CK3-1	PITA_25673	24.1767	23.8244	23.873	26.1239	26.0159	25.9079	23.958	26.0159	-2.05788	-2.04821	-0.0096667	1.00672
CK3-2	PITA_25673	24.864	24.6131	24.7068	26.5744	26.7989	26.7109	24.728	26.6947	-1.96677	-2.04821	0.0814395	0.945114
CK3-3	PITA_25673	25.7037	25.5518	25.4833	27.7331	27.6661	27.6996	25.5796	27.6996	-2.11998	-2.04821	-0.0717729	1.05101
MeJA-1	PITA_25673	23.3137	23.1243	23.0908	28.8586	28.6464	28.9152	23.1763	28.8067	-5.63042	-2.04821	-3.58221	11.9772
MeJA-2	PITA_25673	24.1914	24.083	24.0607	28.0489	27.941	27.9531	24.1117	27.981	-3.86935	-2.04821	-1.82114	3.5336
MeJA-3	PITA_25673	24.4789	23.6862	23.5163	27.5863	27.5907	27.9524	23.8938	27.7098	-3.81599	-2.04821	-1.76778	3.40531
CK3-1	PITA_26508	29.2972	28.7252	29.0056	26.4556	26.5095	26.6825	29.0093	26.5492	2.46014	2.73701	-0.276871	1.21156
CK3-2	PITA_26508	29.3934	28.8511	28.7497	26.5266	26.4447	26.3123	28.9981	26.4279	2.57025	2.73701	-0.166766	1.12254
CK3-3	PITA_26508	29.1967	30.1714	29.8098	26.4414	26.5096	26.6851	29.726	26.5453	3.18065	2.73701	0.443637	0.735278
MeJA-1	PITA_26508	28.9583	28.6178	28.5621	27.0888	26.9799	27.0392	28.7127	27.036	1.67676	2.73701	-1.06026	2.0853
MeJA-2	PITA_26508	28.6349	28.0583	28.4192	27.1025	27.1778	26.7343	28.3708	27.0049	1.36593	2.73701	-1.37108	2.58665
MeJA-3	PITA_26508	29.4107	29.6701	29.6862	27.712	27.5419	27.6269	29.589	27.6269	1.96206	2.73701	-0.774949	1.71113
CK2-1	PITA_26508	27.2985	27.4137	27.5661	25.142	25.0752	25.197	27.4261	25.1381	2.28797	2.27561	0.0123666	0.991465
CK2-2	PITA_26508	27.8715	27.9611	27.9658	26.0335	26.0269	26.0392	27.9328	26.0332	1.89956	2.27561	-0.376047	1.29778
CK2-3	PITA_26508	27.998	28.0482	28.143	25.4324	25.5058	25.3332	28.0631	25.4238	2.63929	2.27561	0.363681	0.777179
Eth-1	PITA_26508	28.722	28.5111	28.3976	26.8923	26.9208	27.0165	28.5436	26.9432	1.60038	2.27561	-0.675223	1.59684
Eth-2	PITA_26508	27.7807	27.5503	27.6577	25.968	25.981	25.8368	27.6629	25.9286	1.73429	2.27561	-0.541319	1.4553
Eth-3	PITA_26508	27.9842	27.5556	27.9377	25.3756	25.204	25.3386	27.8258	25.3061	2.51974	2.27561	0.244139	0.84432
CK1-1	PITA_26508	27.3293	27.2965	27.327	24.258	24.5891	24.4235	27.3176	24.4235	2.89412	2.63246	0.261666	0.834124
CK1-2	PITA_26508	26.7304	26.5934	26.6178	24.2767	24.2815	24.2937	26.6472	24.284	2.3632	2.63246	-0.269259	1.20519
CK1-3	PITA_26508	27.309	27.327	26.9745	24.2092	24.6405	24.8406	27.2035	24.5634	2.64005	2.63246	0.0075929	0.994751
Injury-1	PITA_26508	28.474	28.2927	28.2502	25.0418	25.2294	25.2011	28.339	25.1575	3.18151	2.63246	0.54905	0.68347
Injury-2	PITA_26508	29.6741	30.1733	29.6563	26.1318	26.1066	26.2007	29.8346	26.1464	3.6882	2.63246	1.05575	0.481048
Injury-3	PITA_26508	29.1439	29.2009	29.0592	25.2566	25.139	25.2385	29.1347	25.2114	3.92329	2.63246	1.29083	0.408716
CK1-1	PITA_29504	30.5647	30.1502	30.2298	26.647	26.7737	26.6344	30.3149	26.685	3.62985	3.46858	0.16127	0.894237
CK1-2	PITA_29504	30.7096	30.6222	30.3795	27.1319	27.2264	27.2374	30.5704	27.1986	3.37187	3.46858	-0.0967097	1.06933
CK1-3	PITA_29504	29.8305	29.6937	29.7878	26.2839	26.4334	26.3827	29.7707	26.3667	3.40402	3.46858	-0.0645607	1.04577
Injury-1	PITA_29504	31.0711	31.2103	31.0382	27.6948	27.7199	27.4143	31.1066	27.6097	3.49688	3.46858	0.0283027	0.980573
Injury-2	PITA_29504	31.2671	31.0629	31.4476	27.2801	27.0056	27.0673	31.2592	27.1176	4.14157	3.46858	0.672995	0.627203
Injury-3	PITA_29504	30.5546	30.079	29.977	26.6917	26.8791	27.0293	30.2035	26.8667	3.33686	3.46858	-0.131714	1.09559
CK2-1	PITA_29504	26.5275	26.481	26.6252	25.142	25.0752	25.197	26.5445	25.1381	1.40644	0.993568	0.412868	0.751129
CK2-2	PITA_29504	26.8995	26.6909	26.6999	26.0335	26.0269	26.0392	26.7634	26.0332	0.730206	0.993568	-0.263362	1.20027
CK2-3	PITA_29504	26.4059	26.097	26.3006	25.4324	25.5058	25.3332	26.2678	25.4238	0.844062	0.993568	-0.149506	1.10919
Eth-1	PITA_29504	28.5741	28.2682	28.2268	25.1923	25.2208	25.3165	28.3564	25.2432	3.11319	0.993568	2.11962	0.230108
Eth-2	PITA_29504	27.6849	27.7582	27.6244	25.2843	25.1651	25.0389	27.6892	25.1628	2.5264	0.993568	1.53283	0.345598
Eth-3	PITA_29504	28.0527	28.0259	27.8995	25.068	25.081	24.9368	27.9927	25.0286	2.9641	0.993568	1.97053	0.255159
CK3-1	PITA_29504	28.0914	27.64	27.6438	25.5266	25.4447	25.3123	27.7918	25.4279	2.36389	2.43032	-0.0664281	1.04712
CK3-2	PITA_29504	27.3593	27.5548	27.7776	25.5796	25.2993	25.2144	27.5639	25.3644	2.19949	2.43032	-0.230826	1.17351
CK3-3	PITA_29504	27.4018	27.1552	27.8618	24.6414	24.7096	24.8851	27.4729	24.7453	2.72757	2.43032	0.297254	0.8138
MeJA-1	PITA_29504	27.5384	27.228	27.5719	27.7249	27.0749	27.1879	27.4461	27.3293	0.116856	2.43032	-2.31346	4.97074
MeJA-2	PITA_29504	25.9193	25.9985	26.1742	26.9888	26.8799	26.9392	26.0307	26.936	-0.905308	2.43032	-3.33562	10.0954
MeJA-3	PITA_29504	27.5123	28.1342	27.9637	27.3203	26.7244	27.0223	27.8701	27.0223	0.847788	2.43032	-1.58253	2.99494
CK1-1	PITA_42370	28.0637	27.875	28.0413	26.219	26.2695	26.3751	27.9933	26.2879	1.70544	1.80408	-0.0986399	1.07076
CK1-2	PITA_42370	29.0049	28.7875	29.0263	27.1319	27.2264	27.2374	28.9396	27.1986	1.741	1.80408	-0.0630726	1.04469
CK1-3	PITA_42370	28.5991	28.1154	28.2829	26.2839	26.4334	26.3827	28.3324	26.3667	1.96579	1.80408	0.161712	0.893963
Injury-1	PITA_42370	28.3525	28.3355	28.4952	26.6121	26.5871	26.7611	28.3944	26.6535	1.74093	1.80408	-0.0631488	1.04474
Injury-2	PITA_42370	28.9996	29.6866	29.3482	27.6948	27.7199	27.4143	29.3448	27.6097	1.7351	1.80408	-0.0689764	1.04897
Injury-3	PITA_42370	29.1203	29.1562	29.4101	27.2801	27.0056	27.0673	29.2289	27.1176	2.11127	1.80408	0.307193	0.808213
CK2-1	PITA_42370	29.4973	29.0764	29.4753	28.3677	28.1553	28.3791	29.3497	28.3007	1.049	1.38882	-0.339817	1.2656
CK2-2	PITA_42370	29.5105	29.8357	30.1608	28.0081	27.7252	28.0679	29.8357	27.9337	1.90193	1.38882	0.513106	0.700712
CK2-3	PITA_42370	29.3795	29.3445	29.5936	28.0695	28.2929	28.3086	29.4392	28.2237	1.21553	1.38882	-0.173289	1.12763
Eth-1	PITA_42370	28.6415	28.6052	28.4814	28.794	28.7307	28.1797	28.576	28.5682	0.00785724	1.38882	-1.38096	2.60442
Eth-2	PITA_42370	27.858	27.9273	28.0653	28.9424	29.0872	28.6809	27.9502	28.9035	-0.9533	1.38882	-2.34212	5.07047
Eth-3	PITA_42370	27.6297	27.8893	27.7889	28.1387	28.0877	27.6843	27.7693	27.9702	-0.200893	1.38882	-1.58971	3.00989
CK3-1	PITA_42370	29.1531	29.1989	29.0295	27.7219	27.5571	27.8168	29.1272	27.6986	1.42861	1.20414	0.22447	0.85591
CK3-2	PITA_42370	27.9042	27.9431	28.0725	26.9761	27.3174	27.407	27.9733	27.2335	0.739767	1.20414	-0.464373	1.37972
CK3-3	PITA_42370	29.3518	29.0417	28.995	27.6274	27.765	27.6639	29.1295	27.6854	1.44404	1.20414	0.239903	0.846802
MeJA-1	PITA_42370	28.2643	28.2789	28.3614	27.0884	27.3441	27.4081	28.3015	27.2802	1.02132	1.20414	-0.18282	1.1351
MeJA-2	PITA_42370	26.786	26.8431	26.6934	27.1031	27.2084	27.1795	26.7742	27.1637	-0.38952	1.20414	-1.59366	3.01814
MeJA-3	PITA_42370	27.6703	27.5079	27.7285	27.5215	27.3796	27.3453	27.6356	27.4154	0.220147	1.20414	-0.983993	1.97793
CK1-1	PITA_45859	23.5275	23.2789	23.2866	24.2092	24.6405	24.8406	23.3643	24.5634	-1.19911	-0.978503	-0.220603	1.16522
CK1-2	PITA_45859	24.1371	23.9307	24.1788	25.0278	25.0333	25.2667	24.0822	25.1093	-1.02711	-0.978503	-0.0486046	1.03426
CK1-3	PITA_45859	23.4425	23.8529	23.4287	24.2767	24.2815	24.2937	23.5747	24.284	-0.709295	-0.978503	0.269208	0.829775
Injury-1	PITA_45859	27.2589	27.4844	27.4605	27.2643	27.2434	27.4436	27.4013	27.3171	0.0842054	-0.978503	1.06271	0.478733
Injury-2	PITA_45859	26.9877	26.869	26.9136	27.1266	27.175	27.0977	26.9234	27.1331	-0.209676	-0.978503	0.768826	0.586895
Injury-3	PITA_45859	27.1934	27.1978	27.1843	27.8123	28.0281	27.9943	27.1918	27.9449	-0.753069	-0.978503	0.225433	0.855338
CK2-1	PITA_45859	26.0023	26.0048	25.8459	27.7107	28.0743	27.7049	25.951	27.8299	-1.87893	-1.87753	-0.00139703	1.00097
CK2-2	PITA_45859	25.2898	25.4648	25.3465	27.2663	27.4549	27.4915	25.367	27.4042	-2.03722	-1.87753	-0.159691	1.11705
CK2-3	PITA_45859	26.0447	26.1663	26.3997	27.9486	27.7787	28.0327	26.2036	27.92	-1.71644	-1.87753	0.161088	0.89435
Eth-1	PITA_45859	25.5926	25.7347	25.5861	28.3223	28.5556	28.1914	25.6378	28.3564	-2.71864	-1.87753	-0.841111	1.79143
Eth-2	PITA_45859	24.8021	24.8248	24.6973	28.0359	28.2143	28.0085	24.7747	28.0862	-3.31153	-1.87753	-1.434	2.70195
Eth-3	PITA_45859	24.1562	24.105	24.2529	28.1525	28.0256	27.8988	24.1714	28.0256	-3.85429	-1.87753	-1.97676	3.93608
CK3-1	PITA_45859	25.3468	25.3936	25.4503	26.6176	26.7445	27.0886	25.3969	26.8169	-1.41999	-1.59463	0.174635	0.885992
CK3-2	PITA_45859	24.6207	24.7482	25.0019	26.5744	26.7989	26.7109	24.7903	26.6947	-1.90444	-1.59463	-0.309815	1.23955
CK3-3	PITA_45859	25.4495	25.3508	25.349	26.7969	26.6029	27.128	25.3831	26.8426	-1.45945	-1.59463	0.13518	0.910556
MeJA-1	PITA_45859	27.5761	27.5821	27.9776	26.8586	26.6464	26.9152	27.7119	26.8067	0.905212	-1.59463	2.49984	0.176796
MeJA-2	PITA_45859	25.8158	25.6476	25.7786	26.0489	25.941	25.9531	25.7473	25.981	-0.233695	-1.59463	1.36093	0.38933
MeJA-3	PITA_45859	25.5006	26.1052	25.4412	25.5863	25.5907	25.9524	25.6823	25.7098	-0.0274467	-1.59463	1.56718	0.337467
