# Supplementary material for: Genome-wide identification and characterization of the AP2/ERF gene family in loblolly pine (Pinus taeda L.)
Source: PeerJ. 2024 May 21;12:e17388. doi: 10.7717/peerj.17388 (PMC11122039; doi:10.7717/peerj.17388)
Supplement: Supplemental Information 8 [file peerj-12-17388-s008.xls]

## Sheet: Sheet1
ITEM TO CHECK	IMPORTANCE	CHECKLIST
EXPERIMENTAL DESIGN
Definition of experimental and control groups	E	See line 198-203.
Number within each group	E	See line 222.
Assay carried out by core lab or investigator's lab?	D
Acknowledgement of authors' contributions	D
SAMPLE
Description	E	See line 195-197 .
Volume/mass of sample processed	D
Microdissection or macrodissection	E	Not applicable
Processing procedure	E	See line 203-205.
If frozen - how and how quickly?	E	See line 203-205.
If fixed - with what, how quickly?	E	Not applicable
Sample storage conditions and duration (especially for FFPE samples)	E	Stored at -80℃ for 1-5 days
NUCLEIC ACID EXTRACTION
Procedure and/or instrumentation	E	See line 206-209.
Name of kit and details of any modifications	E	See line 206-207.
Source of additional reagents used	D
Details of DNase or RNAse treatment. no RNase treatment.	E	RNA resuspended in Rnase-Free ddH2o and reverse transcriptase reactions were treated with DNase. No treatment with Rnase.
Contamination assessment (DNA or RNA)	E	Done by OD 260/280 determination.
Nucleic acid quantification	E	See line 207-209.
Instrument and method	E	Biochrom Bio Drop Duo
Purity (A260/A280)	D
Yield	D
RNA integrity method/instrument	E	See line 209.
RIN/RQI or Cq of 3' and 5' transcripts	E	Not performed.
Electrophoresis traces	D
Inhibition testing (Cq dilutions, spike or other)	E	Not performed.
REVERSE TRANSCRIPTION
Complete reaction conditions	E
Amount of RNA and reaction volume	E	See line 209.
Priming oligonucleotide (if using GSP) and concentration	E	Not applicable
Reverse transcriptase and concentration	E	See line 210.
Temperature and time	E	See line 210.
Manufacturer of reagents and catalogue numbers	D
Cqs with and without RT	D*
Storage conditions of cDNA	D
qPCR TARGET INFORMATION
If multiplex, efficiency and LOD of each assay.	E	Not applicable
Sequence accession number	E	See TableS1.
Location of amplicon	D
Amplicon length	E	150-250nt
In silico specificity screen (BLAST, etc)	E	Yes, Blast analysis performed.
Pseudogenes, retropseudogenes or other homologs?	D
Sequence alignment	D
Secondary structure analysis of amplicon	D
Location of each primer by exon or intron (if applicable)	E	Not applicable
What splice variants are targeted?	E	None
qPCR OLIGONUCLEOTIDES
Primer sequences	E	See Table1.
RTPrimerDB Identification Number	D
Probe sequences	D**
Location and identity of any modifications	E	None
Manufacturer of oligonucleotides	D
Purification method	D
qPCR PROTOCOL
Complete reaction conditions	E	See line 213-216 .
Reaction volume and amount of cDNA/DNA	E	See line 213.
Primer, (probe), Mg++ and dNTP concentrations	E	See line 214.
Polymerase identity and concentration	E	See line 212.
Buffer/kit identity and manufacturer	E	See line 212.
Exact chemical constitution of the buffer	D
Additives (SYBR Green I, DMSO, etc.)	E	See line 212.
Manufacturer of plates/tubes and catalog number	D	0.2 ml Real-time PCR Plates(BBI, F603103-0001)
Complete thermocycling parameters	E	See line 215-216.
Reaction setup (manual/robotic)	D
Manufacturer of qPCR instrument	E	Bio-rad
qPCR VALIDATION
Evidence of optimisation (from gradients)	D
Specificity (gel, sequence, melt, or digest)	E	Agarose gel to see single band for GAPDH control.
For SYBR Green I, Cq of the NTC	E	Not performed
Standard curves with slope and y-intercept	E	Not performed
PCR efficiency calculated from slope	E	Not performed
Confidence interval for PCR efficiency or standard error	D
r2 of standard curve	E	Not performed
Linear dynamic range	E	Not performed
Cq variation at lower limit	E	Not performed
Confidence intervals throughout range	D
Evidence for limit of detection	E	Not performed
If multiplex, efficiency and LOD of each assay.	E	Not applicable
DATA ANALYSIS
qPCR analysis program (source, version)	E	Microsoft Excel 2021
Cq method determination	E	Determined and analyzed byBio-Rad CFX Maestro 1.0 software
Outlier identification and disposition	E	Not performed
Results of NTCs	E	Not performed
Justification of number and choice of reference genes	E	1
Description of normalisation method	E	See line 218.
Number and concordance of biological replicates	D
Number and stage (RT or qPCR) of technical replicates	E	3
Repeatability (intra-assay variation)	E	SD< 0.2
Reproducibility (inter-assay variation, %CV)	D
Power analysis	D
Statistical methods for result significance	E	ANOVA
Software (source, version)	E	SPSS 26
Cq or raw data submission using RDML	D
Table 1. MIQE checklist for authors, reviewers and editors. All essential information (E) must be submitted with the manuscript. Desirable
information (D) should be submitted if available. If using primers obtained from RTPrimerDB, information on qPCR target, oligonucleotides,
protocols and validation is available from that source.
*: Assessing the absence of DNA using a no RT assay is essential when first extracting RNA. Once the sample has been validated as
RDNA-free, inclusion of a no-RT control is desirable, but no longer essential.
**: Disclosure of the probe sequence is highly desirable and strongly encouraged. However, since not all commercial pre-designed assay
vendors provide this information, it cannot be an essential requirement. Use of such assays is advised against.
